# Supplementary material for: Entomological signatures in honey: an environmental DNA metabarcoding approach can disclose information on plant-sucking insects in agricultural and forest landscapes
Source: Sci Rep. 2018 Jul 3;8:9996. doi: 10.1038/s41598-018-27933-w (PMC6030050; doi:10.1038/s41598-018-27933-w)
Supplement: Supplementary file 2 — Dataset 1 [file 41598_2018_27933_MOESM2_ESM.xlsx]

## Sheet: Forward primer matched sequence
Sequences producing significant alignments:									Primer forward sequence alignments
Select for downloading or viewing reports	Description	Max score	Total score	Query cover	E value	Identity	Accession number	First nucleotide position match	TGGAWCAGGAACAGGATGAAC	Last nucleotide position match
1Select seq gb|KY613942.1|	Rhopalosiphum rufiabdominalis isolate Jalandhar A6 cytochrome c oxidase subunit 1 (COI) gene, partial cds; mitochondrial	39.4	39.4	1	0.004	0.95	KY613942.1	303	....A................	323
2Select seq gb|KY613941.1|	Rhopalosiphum rufiabdominalis isolate Patna A57 cytochrome c oxidase subunit 1 (COI) gene, partial cds; mitochondrial	39.4	39.4	1	0.004	0.95	KY613941.1	303	....A................	323
3Select seq gb|KY613938.1|	Macrosiphum euphorbiae isolate Shimla A7 cytochrome c oxidase subunit 1 (COI) gene, partial cds; mitochondrial	39.4	39.4	1	0.004	0.95	KY613938.1	312	....A................	332
4Select seq gb|KY613937.1|	Lipaphis erysimi isolate Kankar A1 cytochrome c oxidase subunit 1 (COI) gene, partial cds; mitochondrial	39.4	39.4	1	0.004	0.95	KY613937.1	312	....A................	332
5Select seq gb|KY613934.1|	Hyadaphis coriandri isolate Modipuram_A45 cytochrome c oxidase subunit 1 (COI) gene, partial cds; mitochondrial	39.4	39.4	1	0.004	0.95	KY613934.1	303	....A................	323
6Select seq gb|KY613933.1|	Hyadaphis coriandri isolate Modipuram_A41 cytochrome c oxidase subunit 1 (COI) gene, partial cds; mitochondrial	39.4	39.4	1	0.004	0.95	KY613933.1	303	....A................	323
7Select seq gb|KY606280.1|	Aulacorthum solani isolate Jalandhar_A4 cytochrome c oxidase subunit 1 (COI) gene, partial cds; mitochondrial	39.4	39.4	1	0.004	0.95	KY606280.1	306	....A................	326
8Select seq gb|KY606279.1|	Aulacorthum solani isolate Jalandhar_A3.1 cytochrome c oxidase subunit 1 (COI) gene, partial cds; mitochondrial	39.4	39.4	1	0.004	0.95	KY606279.1	306	....A................	326
9Select seq gb|KY606278.1|	Aulacorthum solani isolate Jalandhar_A3 cytochrome c oxidase subunit 1 (COI) gene, partial cds; mitochondrial	39.4	39.4	1	0.004	0.95	KY606278.1	306	....A................	326
10Select seq gb|KY606277.1|	Aulacorthum solani isolate Sml_A61 cytochrome c oxidase subunit 1 (COI) gene, partial cds; mitochondrial	39.4	39.4	1	0.004	0.95	KY606277.1	306	....A................	326
11Select seq gb|KY606276.1|	Aulacorthum solani isolate Gwalior_A59 cytochrome c oxidase subunit 1 (COI) gene, partial cds; mitochondrial	39.4	39.4	1	0.004	0.95	KY606276.1	306	....A................	326
12Select seq gb|KY606275.1|	Aulacorthum solani isolate Modipuram_CA4 cytochrome c oxidase subunit 1 (COI) gene, partial cds; mitochondrial	39.4	39.4	1	0.004	0.95	KY606275.1	306	....A................	326
13Select seq gb|KY843443.1|	Hyperomyzus lactucae voucher BIOUG02533-B03 cytochrome oxidase subunit 1 (COI) gene, partial cds; mitochondrial	39.4	39.4	1	0.004	0.95	KY843443.1	313	....A................	333
14Select seq gb|KY843391.1|	Hysteroneura setariae voucher BIOUG17840-E07 cytochrome oxidase subunit 1 (COI) gene, partial cds; mitochondrial	39.4	39.4	1	0.004	0.95	KY843391.1	312	....A................	332
15Select seq gb|KY843172.1|	Aphis sp. BIOUG17832-F07 cytochrome oxidase subunit 1 (COI) gene, partial cds; mitochondrial	39.4	39.4	1	0.004	0.95	KY843172.1	312	....A................	332
16Select seq gb|KY842881.1|	Hysteroneura setariae voucher BIOUG15298-D03 cytochrome oxidase subunit 1 (COI) gene, partial cds; mitochondrial	39.4	39.4	1	0.004	0.95	KY842881.1	271	....A................	291
17Select seq gb|KY842853.1|	Acyrthosiphon pisum voucher BIOUG02527-B10 cytochrome oxidase subunit 1 (COI) gene, partial cds; mitochondrial	39.4	39.4	1	0.004	0.95	KY842853.1	313	....A................	333
18Select seq gb|KY842435.1|	Aphis spiraecola voucher BIOUG02439-F06 cytochrome oxidase subunit 1 (COI) gene, partial cds; mitochondrial	39.4	39.4	1	0.004	0.95	KY842435.1	313	....A................	333
19Select seq gb|KY842424.1|	Aphis craccivora voucher BIOUG02439-G04 cytochrome oxidase subunit 1 (COI) gene, partial cds; mitochondrial	39.4	39.4	1	0.004	0.95	KY842424.1	313	....A................	333
20Select seq gb|KY842344.1|	Acyrthosiphon pisum voucher BIOUG02579-B08 cytochrome oxidase subunit 1 (COI) gene, partial cds; mitochondrial	39.4	39.4	1	0.004	0.95	KY842344.1	313	....A................	333
21Select seq gb|KY842196.1|	Aphis spiraecola voucher BIOUG02439-G09 cytochrome oxidase subunit 1 (COI) gene, partial cds; mitochondrial	39.4	39.4	1	0.004	0.95	KY842196.1	313	....A................	333
22Select seq gb|KY842009.1|	Aphis spiraecola voucher BIOUG02527-B07 cytochrome oxidase subunit 1 (COI) gene, partial cds; mitochondrial	39.4	39.4	1	0.004	0.95	KY842009.1	313	....A................	333
23Select seq gb|KY841985.1|	Aphis spiraecola voucher BIOUG02439-B04 cytochrome oxidase subunit 1 (COI) gene, partial cds; mitochondrial	39.4	39.4	1	0.004	0.95	KY841985.1	313	....A................	333
24Select seq gb|KY841725.1|	Acyrthosiphon pisum voucher BIOUG02527-B11 cytochrome oxidase subunit 1 (COI) gene, partial cds; mitochondrial	39.4	39.4	1	0.004	0.95	KY841725.1	97	....A................	117
25Select seq gb|KY841633.1|	Aphis craccivora voucher BIOUG04903-C12 cytochrome oxidase subunit 1 (COI) gene, partial cds; mitochondrial	39.4	39.4	1	0.004	0.95	KY841633.1	226	....A................	246
26Select seq gb|KY841618.1|	Aphis spiraecola voucher BIOUG02439-C06 cytochrome oxidase subunit 1 (COI) gene, partial cds; mitochondrial	39.4	39.4	1	0.004	0.95	KY841618.1	313	....A................	333
27Select seq gb|KY841003.1|	Aphis spiraecola voucher BIOUG02439-F07 cytochrome oxidase subunit 1 (COI) gene, partial cds; mitochondrial	39.4	39.4	1	0.004	0.95	KY841003.1	313	....A................	333
28Select seq gb|KY840930.1|	Aphis craccivora voucher BIOUG02527-B03 cytochrome oxidase subunit 1 (COI) gene, partial cds; mitochondrial	39.4	39.4	1	0.004	0.95	KY840930.1	313	....A................	333
29Select seq gb|KY840405.1|	Hysteroneura setariae voucher BIOUG15298-C05 cytochrome oxidase subunit 1 (COI) gene, partial cds; mitochondrial	39.4	39.4	1	0.004	0.95	KY840405.1	303	....A................	323
30Select seq gb|KY840243.1|	Aphis sp. BIOUG02579-B12 cytochrome oxidase subunit 1 (COI) gene, partial cds; mitochondrial	39.4	39.4	1	0.004	0.95	KY840243.1	313	....A................	333
31Select seq gb|KY839618.1|	Acyrthosiphon pisum voucher BIOUG02579-B07 cytochrome oxidase subunit 1 (COI) gene, partial cds; mitochondrial	39.4	39.4	1	0.004	0.95	KY839618.1	313	....A................	333
32Select seq gb|KY838627.1|	Aphis spiraecola voucher BIOUG17840-F05 cytochrome oxidase subunit 1 (COI) gene, partial cds; mitochondrial	39.4	39.4	1	0.004	0.95	KY838627.1	303	....A................	323
33Select seq gb|KY838556.1|	Aphis sp. voucher BIOUG02533-B11 cytochrome oxidase subunit 1 (COI) gene, partial cds; mitochondrial	39.4	39.4	1	0.004	0.95	KY838556.1	313	....A................	333
34Select seq gb|KY838533.1|	Aphis spiraecola voucher BIOUG02533-F01 cytochrome oxidase subunit 1 (COI) gene, partial cds; mitochondrial	39.4	39.4	1	0.004	0.95	KY838533.1	296	....A................	316
35Select seq gb|KY838209.1|	Rhopalosiphum rufiabdominalis voucher BIOUG02439-C08 cytochrome oxidase subunit 1 (COI) gene, partial cds; mitochondrial	39.4	39.4	1	0.004	0.95	KY838209.1	313	....A................	333
36Select seq gb|KY838020.1|	Aphis craccivora voucher BIOUG02134-F03 cytochrome oxidase subunit 1 (COI) gene, partial cds; mitochondrial	39.4	39.4	1	0.004	0.95	KY838020.1	313	....A................	333
37Select seq gb|KY837976.1|	Acyrthosiphon pisum voucher BIOUG02579-B05 cytochrome oxidase subunit 1 (COI) gene, partial cds; mitochondrial	39.4	39.4	1	0.004	0.95	KY837976.1	313	....A................	333
38Select seq gb|KY837642.1|	Acyrthosiphon pisum voucher BIOUG02533-A12 cytochrome oxidase subunit 1 (COI) gene, partial cds; mitochondrial	39.4	39.4	1	0.004	0.95	KY837642.1	313	....A................	333
39Select seq gb|KY837424.1|	Aphis spiraecola voucher BIOUG02527-A03 cytochrome oxidase subunit 1 (COI) gene, partial cds; mitochondrial	39.4	39.4	1	0.004	0.95	KY837424.1	313	....A................	333
40Select seq gb|KY837406.1|	Hyperomyzus lactucae voucher BIOUG02439-D11 cytochrome oxidase subunit 1 (COI) gene, partial cds; mitochondrial	39.4	39.4	1	0.004	0.95	KY837406.1	313	....A................	333
41Select seq gb|KY837367.1|	Aphis craccivora voucher BIOUG02439-C05 cytochrome oxidase subunit 1 (COI) gene, partial cds; mitochondrial	39.4	39.4	1	0.004	0.95	KY837367.1	313	....A................	333
42Select seq gb|KY837024.1|	Hyperomyzus lactucae voucher BIOUG02527-C06 cytochrome oxidase subunit 1 (COI) gene, partial cds; mitochondrial	39.4	39.4	1	0.004	0.95	KY837024.1	313	....A................	333
43Select seq gb|KY837014.1|	Rhodobium porosum voucher BIOUG02439-G07 cytochrome oxidase subunit 1 (COI) gene, partial cds; mitochondrial	39.4	39.4	1	0.004	0.95	KY837014.1	313	....A................	333
44Select seq gb|KY836855.1|	Acyrthosiphon pisum voucher BIOUG02533-B06 cytochrome oxidase subunit 1 (COI) gene, partial cds; mitochondrial	39.4	39.4	1	0.004	0.95	KY836855.1	231	....A................	251
45Select seq gb|KY836830.1|	Aphis craccivora voucher BIOUG02439-E02 cytochrome oxidase subunit 1 (COI) gene, partial cds; mitochondrial	39.4	39.4	1	0.004	0.95	KY836830.1	313	....A................	333
46Select seq gb|KY836813.1|	Aphis craccivora voucher BIOUG02439-D02 cytochrome oxidase subunit 1 (COI) gene, partial cds; mitochondrial	39.4	39.4	1	0.004	0.95	KY836813.1	313	....A................	333
47Select seq gb|KY836784.1|	Aphis spiraecola voucher BIOUG17840-D05 cytochrome oxidase subunit 1 (COI) gene, partial cds; mitochondrial	39.4	39.4	1	0.004	0.95	KY836784.1	291	....A................	311
48Select seq gb|KY836697.1|	Aphis spiraecola voucher BIOUG02527-E09 cytochrome oxidase subunit 1 (COI) gene, partial cds; mitochondrial	39.4	39.4	1	0.004	0.95	KY836697.1	313	....A................	333
49Select seq gb|KY836584.1|	Acyrthosiphon pisum voucher BIOUG02439-F02 cytochrome oxidase subunit 1 (COI) gene, partial cds; mitochondrial	39.4	39.4	1	0.004	0.95	KY836584.1	313	....A................	333
50Select seq gb|KY836217.1|	Aphis craccivora voucher BIOUG02439-H06 cytochrome oxidase subunit 1 (COI) gene, partial cds; mitochondrial	39.4	39.4	1	0.004	0.95	KY836217.1	313	....A................	333
51Select seq gb|KX014609.1|	Aphis craccivora voucher APWKCHB4 cytochrome oxidase subunit I (COI) gene, partial cds; mitochondrial	39.4	39.4	1	0.004	0.95	KX014609.1	246	....A................	266
52Select seq gb|KX014608.1|	Aphis craccivora voucher APWKCHB2 cytochrome oxidase subunit I (COI) gene, partial cds; mitochondrial	39.4	39.4	1	0.004	0.95	KX014608.1	246	....A................	266
53Select seq gb|KX014604.1|	Aphis craccivora voucher APWSS1 cytochrome oxidase subunit I (COI) gene, partial cds; mitochondrial	39.4	39.4	1	0.004	0.95	KX014604.1	246	....A................	266
54Select seq gb|KX014603.1|	Aphis craccivora voucher APCNS3 cytochrome oxidase subunit I (COI) gene, partial cds; mitochondrial	39.4	39.4	1	0.004	0.95	KX014603.1	246	....A................	266
55Select seq gb|KX014602.1|	Aphis craccivora voucher APCPL5 cytochrome oxidase subunit I (COI) gene, partial cds; mitochondrial	39.4	39.4	1	0.004	0.95	KX014602.1	246	....A................	266
56Select seq gb|KX014595.1|	Aphis craccivora voucher APNCM10 cytochrome oxidase subunit I (COI) gene, partial cds; mitochondrial	39.4	39.4	1	0.004	0.95	KX014595.1	246	....A................	266
57Select seq gb|KX014593.1|	Aphis craccivora voucher APNCM6 cytochrome oxidase subunit I (COI) gene, partial cds; mitochondrial	39.4	39.4	1	0.004	0.95	KX014593.1	246	....A................	266
58Select seq gb|KY788347.1|	Diuraphis noxia cytochrome oxidase subunit I (COI) gene, partial cds; mitochondrial	39.4	39.4	1	0.004	0.95	KY788347.1	289	....A................	309
59Select seq gb|KY307243.1|	Tuberculatus fangi isolate Q69 cytochrome oxidase subunit 1 (COI) gene, partial cds; mitochondrial	39.4	39.4	1	0.004	0.95	KY307243.1	315	....A................	335
60Select seq gb|KY307242.1|	Tuberculatus fangi isolate Q47-2 cytochrome oxidase subunit 1 (COI) gene, partial cds; mitochondrial	39.4	39.4	1	0.004	0.95	KY307242.1	315	....A................	335
61Select seq gb|KY307241.1|	Tuberculatus fangi isolate Q43 cytochrome oxidase subunit 1 (COI) gene, partial cds; mitochondrial	39.4	39.4	1	0.004	0.95	KY307241.1	315	....A................	335
62Select seq gb|KY307240.1|	Tuberculatus fangi isolate Q37 cytochrome oxidase subunit 1 (COI) gene, partial cds; mitochondrial	39.4	39.4	1	0.004	0.95	KY307240.1	315	....A................	335
63Select seq gb|KY307239.1|	Tuberculatus fangi isolate Q36 cytochrome oxidase subunit 1 (COI) gene, partial cds; mitochondrial	39.4	39.4	1	0.004	0.95	KY307239.1	315	....A................	335
64Select seq gb|KY307238.1|	Tuberculatus fangi isolate Q20 cytochrome oxidase subunit 1 (COI) gene, partial cds; mitochondrial	39.4	39.4	1	0.004	0.95	KY307238.1	315	....A................	335
65Select seq gb|KY307237.1|	Tuberculatus fangi isolate Q19 cytochrome oxidase subunit 1 (COI) gene, partial cds; mitochondrial	39.4	39.4	1	0.004	0.95	KY307237.1	315	....A................	335
66Select seq gb|KY307236.1|	Tuberculatus fangi isolate Q15 cytochrome oxidase subunit 1 (COI) gene, partial cds; mitochondrial	39.4	39.4	1	0.004	0.95	KY307236.1	315	....A................	335
67Select seq gb|KY307235.1|	Tuberculatus capitatus isolate TC2-2 cytochrome oxidase subunit 1 (COI) gene, partial cds; mitochondrial	39.4	39.4	1	0.004	0.95	KY307235.1	315	....A................	335
68Select seq gb|KY307234.1|	Tuberculatus capitatus isolate TC1 cytochrome oxidase subunit 1 (COI) gene, partial cds; mitochondrial	39.4	39.4	1	0.004	0.95	KY307234.1	315	....A................	335
69Select seq gb|KY307233.1|	Tuberculatus capitatus isolate Q22 cytochrome oxidase subunit 1 (COI) gene, partial cds; mitochondrial	39.4	39.4	1	0.004	0.95	KY307233.1	315	....A................	335
70Select seq gb|KY307232.1|	Tuberculatus kuricola isolate Q82-6 cytochrome oxidase subunit 1 (COI) gene, partial cds; mitochondrial	39.4	39.4	1	0.004	0.95	KY307232.1	315	....A................	335
71Select seq gb|KY307231.1|	Tuberculatus kuricola isolate Q82-5 cytochrome oxidase subunit 1 (COI) gene, partial cds; mitochondrial	39.4	39.4	1	0.004	0.95	KY307231.1	315	....A................	335
72Select seq gb|KY307230.1|	Tuberculatus kuricola isolate Q82-4 cytochrome oxidase subunit 1 (COI) gene, partial cds; mitochondrial	39.4	39.4	1	0.004	0.95	KY307230.1	315	....A................	335
73Select seq gb|KY307229.1|	Tuberculatus kuricola isolate Q82-3 cytochrome oxidase subunit 1 (COI) gene, partial cds; mitochondrial	39.4	39.4	1	0.004	0.95	KY307229.1	315	....A................	335
74Select seq gb|KY307228.1|	Tuberculatus kuricola isolate Q82-2 cytochrome oxidase subunit 1 (COI) gene, partial cds; mitochondrial	39.4	39.4	1	0.004	0.95	KY307228.1	315	....A................	335
75Select seq gb|KY307227.1|	Tuberculatus kuricola isolate Q82-1 cytochrome oxidase subunit 1 (COI) gene, partial cds; mitochondrial	39.4	39.4	1	0.004	0.95	KY307227.1	315	....A................	335
76Select seq gb|KY307226.1|	Tuberculatus kuricola isolate Q81 cytochrome oxidase subunit 1 (COI) gene, partial cds; mitochondrial	39.4	39.4	1	0.004	0.95	KY307226.1	315	....A................	335
77Select seq gb|KY307225.1|	Tuberculatus kuricola isolate Q51 cytochrome oxidase subunit 1 (COI) gene, partial cds; mitochondrial	39.4	39.4	1	0.004	0.95	KY307225.1	315	....A................	335
78Select seq gb|KY307224.1|	Tuberculatus kuricola isolate Q42 cytochrome oxidase subunit 1 (COI) gene, partial cds; mitochondrial	39.4	39.4	1	0.004	0.95	KY307224.1	315	....A................	335
79Select seq gb|KY307223.1|	Tuberculatus kuricola isolate Q25 cytochrome oxidase subunit 1 (COI) gene, partial cds; mitochondrial	39.4	39.4	1	0.004	0.95	KY307223.1	315	....A................	335
80Select seq gb|KY307222.1|	Tuberculatus kuricola isolate NK5-n3 cytochrome oxidase subunit 1 (COI) gene, partial cds; mitochondrial	39.4	39.4	1	0.004	0.95	KY307222.1	315	....A................	335
81Select seq gb|KY307221.1|	Tuberculatus kuricola isolate NK5-n2 cytochrome oxidase subunit 1 (COI) gene, partial cds; mitochondrial	39.4	39.4	1	0.004	0.95	KY307221.1	315	....A................	335
82Select seq gb|KY307220.1|	Tuberculatus kuricola isolate NK5-n1 cytochrome oxidase subunit 1 (COI) gene, partial cds; mitochondrial	39.4	39.4	1	0.004	0.95	KY307220.1	315	....A................	335
83Select seq gb|KY307219.1|	Tuberculatus kuricola isolate NK5-2 cytochrome oxidase subunit 1 (COI) gene, partial cds; mitochondrial	39.4	39.4	1	0.004	0.95	KY307219.1	315	....A................	335
84Select seq gb|KY307218.1|	Tuberculatus kuricola isolate NK5-1 cytochrome oxidase subunit 1 (COI) gene, partial cds; mitochondrial	39.4	39.4	1	0.004	0.95	KY307218.1	315	....A................	335
85Select seq gb|KY307217.1|	Tuberculatus kuricola isolate NK4-2 cytochrome oxidase subunit 1 (COI) gene, partial cds; mitochondrial	39.4	39.4	1	0.004	0.95	KY307217.1	315	....A................	335
86Select seq gb|KY307216.1|	Tuberculatus kuricola isolate NK4-1 cytochrome oxidase subunit 1 (COI) gene, partial cds; mitochondrial	39.4	39.4	1	0.004	0.95	KY307216.1	315	....A................	335
87Select seq gb|KY307215.1|	Tuberculatus kuricola isolate NK3-n1 cytochrome oxidase subunit 1 (COI) gene, partial cds; mitochondrial	39.4	39.4	1	0.004	0.95	KY307215.1	315	....A................	335
88Select seq gb|KY307214.1|	Tuberculatus kuricola isolate NK3-7 cytochrome oxidase subunit 1 (COI) gene, partial cds; mitochondrial	39.4	39.4	1	0.004	0.95	KY307214.1	315	....A................	335
89Select seq gb|KY307213.1|	Tuberculatus kuricola isolate NK3-6 cytochrome oxidase subunit 1 (COI) gene, partial cds; mitochondrial	39.4	39.4	1	0.004	0.95	KY307213.1	315	....A................	335
90Select seq gb|KY307212.1|	Tuberculatus kuricola isolate NK3-5 cytochrome oxidase subunit 1 (COI) gene, partial cds; mitochondrial	39.4	39.4	1	0.004	0.95	KY307212.1	315	....A................	335
91Select seq gb|KY307211.1|	Tuberculatus kuricola isolate NK3-4 cytochrome oxidase subunit 1 (COI) gene, partial cds; mitochondrial	39.4	39.4	1	0.004	0.95	KY307211.1	315	....A................	335
92Select seq gb|KY307210.1|	Tuberculatus kuricola isolate NK3-3 cytochrome oxidase subunit 1 (COI) gene, partial cds; mitochondrial	39.4	39.4	1	0.004	0.95	KY307210.1	315	....A................	335
93Select seq gb|KY307209.1|	Tuberculatus kuricola isolate NK3-2 cytochrome oxidase subunit 1 (COI) gene, partial cds; mitochondrial	39.4	39.4	1	0.004	0.95	KY307209.1	315	....A................	335
94Select seq gb|KY307208.1|	Tuberculatus kuricola isolate NK3-1 cytochrome oxidase subunit 1 (COI) gene, partial cds; mitochondrial	39.4	39.4	1	0.004	0.95	KY307208.1	315	....A................	335
95Select seq gb|KY307207.1|	Tuberculatus kuricola isolate NK2-2 cytochrome oxidase subunit 1 (COI) gene, partial cds; mitochondrial	39.4	39.4	1	0.004	0.95	KY307207.1	315	....A................	335
96Select seq gb|KY307206.1|	Tuberculatus kuricola isolate NK2-1 cytochrome oxidase subunit 1 (COI) gene, partial cds; mitochondrial	39.4	39.4	1	0.004	0.95	KY307206.1	315	....A................	335
97Select seq gb|KY307205.1|	Tuberculatus kuricola isolate NK1-8 cytochrome oxidase subunit 1 (COI) gene, partial cds; mitochondrial	39.4	39.4	1	0.004	0.95	KY307205.1	315	....A................	335
98Select seq gb|KY307204.1|	Tuberculatus kuricola isolate NK1-7 cytochrome oxidase subunit 1 (COI) gene, partial cds; mitochondrial	39.4	39.4	1	0.004	0.95	KY307204.1	315	....A................	335
99Select seq gb|KY307203.1|	Tuberculatus kuricola isolate NK1-5 cytochrome oxidase subunit 1 (COI) gene, partial cds; mitochondrial	39.4	39.4	1	0.004	0.95	KY307203.1	315	....A................	335
100Select seq gb|KY307202.1|	Tuberculatus kuricola isolate NK1-4 cytochrome oxidase subunit 1 (COI) gene, partial cds; mitochondrial	39.4	39.4	1	0.004	0.95	KY307202.1	315	....A................	335
101Select seq gb|KY307201.1|	Tuberculatus kuricola isolate NK1-2 cytochrome oxidase subunit 1 (COI) gene, partial cds; mitochondrial	39.4	39.4	1	0.004	0.95	KY307201.1	315	....A................	335
102Select seq gb|KY307200.1|	Tuberculatus kuricola isolate NK1-1 cytochrome oxidase subunit 1 (COI) gene, partial cds; mitochondrial	39.4	39.4	1	0.004	0.95	KY307200.1	315	....A................	335
103Select seq gb|KY307199.1|	Tuberculatus kuricola isolate JP2-3 cytochrome oxidase subunit 1 (COI) gene, partial cds; mitochondrial	39.4	39.4	1	0.004	0.95	KY307199.1	315	....A................	335
104Select seq gb|KY307198.1|	Tuberculatus kuricola isolate JP2-2 cytochrome oxidase subunit 1 (COI) gene, partial cds; mitochondrial	39.4	39.4	1	0.004	0.95	KY307198.1	315	....A................	335
105Select seq gb|KY307197.1|	Tuberculatus kuricola isolate JP2-1 cytochrome oxidase subunit 1 (COI) gene, partial cds; mitochondrial	39.4	39.4	1	0.004	0.95	KY307197.1	315	....A................	335
106Select seq gb|KY307183.1|	Tuberculatus japonicus isolate Q47-1 cytochrome oxidase subunit 1 (COI) gene, partial cds; mitochondrial	39.4	39.4	1	0.004	0.95	KY307183.1	315	....A................	335
107Select seq gb|KY307153.1|	Tuberculatus quercicola isolate Q17-3 cytochrome oxidase subunit 1 (COI) gene, partial cds; mitochondrial	39.4	39.4	1	0.004	0.95	KY307153.1	315	....A................	335
108Select seq gb|KY307152.1|	Tuberculatus quercicola isolate Q17-2 cytochrome oxidase subunit 1 (COI) gene, partial cds; mitochondrial	39.4	39.4	1	0.004	0.95	KY307152.1	315	....A................	335
109Select seq gb|KY307142.1|	Tuberculatus annulatus isolate Pol9-3 cytochrome oxidase subunit 1 (COI) gene, partial cds; mitochondrial	39.4	39.4	1	0.004	0.95	KY307142.1	315	....A................	335
110Select seq gb|KY307141.1|	Tuberculatus annulatus isolate Pol9-2 cytochrome oxidase subunit 1 (COI) gene, partial cds; mitochondrial	39.4	39.4	1	0.004	0.95	KY307141.1	315	....A................	335
111Select seq gb|KY307140.1|	Tuberculatus annulatus isolate Pol9-1 cytochrome oxidase subunit 1 (COI) gene, partial cds; mitochondrial	39.4	39.4	1	0.004	0.95	KY307140.1	315	....A................	335
112Select seq gb|KY307139.1|	Tuberculatus annulatus isolate Pol3-2 cytochrome oxidase subunit 1 (COI) gene, partial cds; mitochondrial	39.4	39.4	1	0.004	0.95	KY307139.1	315	....A................	335
113Select seq gb|KY307138.1|	Tuberculatus annulatus isolate Pol3-1 cytochrome oxidase subunit 1 (COI) gene, partial cds; mitochondrial	39.4	39.4	1	0.004	0.95	KY307138.1	315	....A................	335
114Select seq gb|KY307086.1|	Tiliaphis shinae isolate T9-2 cytochrome oxidase subunit 1 (COI) gene, partial cds; mitochondrial	39.4	39.4	1	0.004	0.95	KY307086.1	315	....A................	335
115Select seq gb|KY307085.1|	Tiliaphis shinae isolate T6-1 cytochrome oxidase subunit 1 (COI) gene, partial cds; mitochondrial	39.4	39.4	1	0.004	0.95	KY307085.1	315	....A................	335
116Select seq gb|KY307084.1|	Tiliaphis shinae isolate T5-1 cytochrome oxidase subunit 1 (COI) gene, partial cds; mitochondrial	39.4	39.4	1	0.004	0.95	KY307084.1	315	....A................	335
117Select seq gb|KY307077.1|	Tiliaphis coreana isolate T16 cytochrome oxidase subunit 1 (COI) gene, partial cds; mitochondrial	39.4	39.4	1	0.004	0.95	KY307077.1	315	....A................	335
118Select seq gb|KY307076.1|	Tiliaphis coreana isolate T13 cytochrome oxidase subunit 1 (COI) gene, partial cds; mitochondrial	39.4	39.4	1	0.004	0.95	KY307076.1	315	....A................	335
119Select seq gb|KY307055.1|	Takecallis arundinariae isolate S18 cytochrome oxidase subunit 1 (COI) gene, partial cds; mitochondrial	39.4	39.4	1	0.004	0.95	KY307055.1	315	....A................	335
120Select seq gb|KY307054.1|	Takecallis arundinariae isolate S17 cytochrome oxidase subunit 1 (COI) gene, partial cds; mitochondrial	39.4	39.4	1	0.004	0.95	KY307054.1	315	....A................	335
121Select seq gb|KY307052.1|	Takecallis arundicolens isolate Take1-1 cytochrome oxidase subunit 1 (COI) gene, partial cds; mitochondrial	39.4	39.4	1	0.004	0.95	KY307052.1	315	....A................	335
122Select seq gb|KY307046.1|	Takecallis arundicolens isolate S7-3 cytochrome oxidase subunit 1 (COI) gene, partial cds; mitochondrial	39.4	39.4	1	0.004	0.95	KY307046.1	315	....A................	335
123Select seq gb|KY307045.1|	Takecallis arundicolens isolate S7-2 cytochrome oxidase subunit 1 (COI) gene, partial cds; mitochondrial	39.4	39.4	1	0.004	0.95	KY307045.1	315	....A................	335
124Select seq gb|KY307044.1|	Takecallis arundicolens isolate S7-1 cytochrome oxidase subunit 1 (COI) gene, partial cds; mitochondrial	39.4	39.4	1	0.004	0.95	KY307044.1	315	....A................	335
125Select seq gb|KY307042.1|	Takecallis arundicolens isolate S5 cytochrome oxidase subunit 1 (COI) gene, partial cds; mitochondrial	39.4	39.4	1	0.004	0.95	KY307042.1	315	....A................	335
126Select seq gb|KY307041.1|	Takecallis arundicolens isolate S4 cytochrome oxidase subunit 1 (COI) gene, partial cds; mitochondrial	39.4	39.4	1	0.004	0.95	KY307041.1	315	....A................	335
127Select seq gb|KY307040.1|	Takecallis arundicolens isolate S2 cytochrome oxidase subunit 1 (COI) gene, partial cds; mitochondrial	39.4	39.4	1	0.004	0.95	KY307040.1	315	....A................	335
128Select seq gb|KY307027.1|	Takecallis arundicolens isolate S1 cytochrome oxidase subunit 1 (COI) gene, partial cds; mitochondrial	39.4	39.4	1	0.004	0.95	KY307027.1	315	....A................	335
129Select seq gb|KY307026.1|	Takecallis arundicolens isolate CZ9-5 cytochrome oxidase subunit 1 (COI) gene, partial cds; mitochondrial	39.4	39.4	1	0.004	0.95	KY307026.1	315	....A................	335
130Select seq gb|KY307025.1|	Takecallis arundicolens isolate CZ9-4 cytochrome oxidase subunit 1 (COI) gene, partial cds; mitochondrial	39.4	39.4	1	0.004	0.95	KY307025.1	315	....A................	335
131Select seq gb|KY307024.1|	Takecallis arundicolens isolate CZ9-3 cytochrome oxidase subunit 1 (COI) gene, partial cds; mitochondrial	39.4	39.4	1	0.004	0.95	KY307024.1	315	....A................	335
132Select seq gb|KY307023.1|	Takecallis arundicolens isolate CZ9-2 cytochrome oxidase subunit 1 (COI) gene, partial cds; mitochondrial	39.4	39.4	1	0.004	0.95	KY307023.1	315	....A................	335
133Select seq gb|KY307022.1|	Takecallis arundicolens isolate CZ9-1 cytochrome oxidase subunit 1 (COI) gene, partial cds; mitochondrial	39.4	39.4	1	0.004	0.95	KY307022.1	315	....A................	335
134Select seq gb|KY307011.1|	Shivaphis tilisucta isolate Shi4-1 cytochrome oxidase subunit 1 (COI) gene, partial cds; mitochondrial	39.4	39.4	1	0.004	0.95	KY307011.1	315	....A................	335
135Select seq gb|KY307010.1|	Shivaphis tilisucta isolate Shi2 cytochrome oxidase subunit 1 (COI) gene, partial cds; mitochondrial	39.4	39.4	1	0.004	0.95	KY307010.1	315	....A................	335
136Select seq gb|KY307009.1|	Shivaphis tilisucta isolate Shi1 cytochrome oxidase subunit 1 (COI) gene, partial cds; mitochondrial	39.4	39.4	1	0.004	0.95	KY307009.1	315	....A................	335
137Select seq gb|KY307008.1|	Shivaphis tilisucta isolate Ce11 cytochrome oxidase subunit 1 (COI) gene, partial cds; mitochondrial	39.4	39.4	1	0.004	0.95	KY307008.1	315	....A................	335
138Select seq gb|KY307007.1|	Shivaphis szelegiewiczi isolate Ce7-6 cytochrome oxidase subunit 1 (COI) gene, partial cds; mitochondrial	39.4	39.4	1	0.004	0.95	KY307007.1	315	....A................	335
139Select seq gb|KY307006.1|	Shivaphis szelegiewiczi isolate Ce7-5 cytochrome oxidase subunit 1 (COI) gene, partial cds; mitochondrial	39.4	39.4	1	0.004	0.95	KY307006.1	315	....A................	335
140Select seq gb|KY307005.1|	Shivaphis szelegiewiczi isolate Ce7-4 cytochrome oxidase subunit 1 (COI) gene, partial cds; mitochondrial	39.4	39.4	1	0.004	0.95	KY307005.1	315	....A................	335
141Select seq gb|KY307004.1|	Shivaphis szelegiewiczi isolate Ce7-3 cytochrome oxidase subunit 1 (COI) gene, partial cds; mitochondrial	39.4	39.4	1	0.004	0.95	KY307004.1	315	....A................	335
142Select seq gb|KY307003.1|	Shivaphis szelegiewiczi isolate Ce7-2 cytochrome oxidase subunit 1 (COI) gene, partial cds; mitochondrial	39.4	39.4	1	0.004	0.95	KY307003.1	315	....A................	335
143Select seq gb|KY307002.1|	Shivaphis szelegiewiczi isolate Ce7-1 cytochrome oxidase subunit 1 (COI) gene, partial cds; mitochondrial	39.4	39.4	1	0.004	0.95	KY307002.1	315	....A................	335
144Select seq gb|KY306962.1|	Myzocallis occidentalis isolate US1-2 cytochrome oxidase subunit 1 (COI) gene, partial cds; mitochondrial	39.4	39.4	1	0.004	0.95	KY306962.1	315	....A................	335
145Select seq gb|KY306961.1|	Myzocallis occidentalis isolate US1-1 cytochrome oxidase subunit 1 (COI) gene, partial cds; mitochondrial	39.4	39.4	1	0.004	0.95	KY306961.1	315	....A................	335
146Select seq gb|KY306960.1|	Myzocallis carpini isolate Z15-2 cytochrome oxidase subunit 1 (COI) gene, partial cds; mitochondrial	39.4	39.4	1	0.004	0.95	KY306960.1	315	....A................	335
147Select seq gb|KY306959.1|	Myzocallis carpini isolate Z15-1 cytochrome oxidase subunit 1 (COI) gene, partial cds; mitochondrial	39.4	39.4	1	0.004	0.95	KY306959.1	315	....A................	335
148Select seq gb|KY306958.1|	Myzocallis carpini isolate Pol6-2 cytochrome oxidase subunit 1 (COI) gene, partial cds; mitochondrial	39.4	39.4	1	0.004	0.95	KY306958.1	315	....A................	335
149Select seq gb|KY306957.1|	Myzocallis carpini isolate Pol6-1 cytochrome oxidase subunit 1 (COI) gene, partial cds; mitochondrial	39.4	39.4	1	0.004	0.95	KY306957.1	315	....A................	335
150Select seq gb|KY306956.1|	Myzocallis carpini isolate CZ6 cytochrome oxidase subunit 1 (COI) gene, partial cds; mitochondrial	39.4	39.4	1	0.004	0.95	KY306956.1	315	....A................	335
151Select seq gb|KY306838.1|	Callipterinella sp. B82-2 cytochrome oxidase subunit 1 (COI) gene, partial cds; mitochondrial	39.4	39.4	1	0.004	0.95	KY306838.1	315	....A................	335
152Select seq gb|KY306837.1|	Callipterinella sp. B82-1 cytochrome oxidase subunit 1 (COI) gene, partial cds; mitochondrial	39.4	39.4	1	0.004	0.95	KY306837.1	315	....A................	335
153Select seq gb|KY306836.1|	Callipterinella calliptera isolate US3-3 cytochrome oxidase subunit 1 (COI) gene, partial cds; mitochondrial	39.4	39.4	1	0.004	0.95	KY306836.1	315	....A................	335
154Select seq gb|KY306835.1|	Callipterinella calliptera isolate B61 cytochrome oxidase subunit 1 (COI) gene, partial cds; mitochondrial	39.4	39.4	1	0.004	0.95	KY306835.1	315	....A................	335
155Select seq gb|KY306834.1|	Callipterinella calliptera isolate B60 cytochrome oxidase subunit 1 (COI) gene, partial cds; mitochondrial	39.4	39.4	1	0.004	0.95	KY306834.1	315	....A................	335
156Select seq gb|KY306833.1|	Callipterinella calliptera isolate B51 cytochrome oxidase subunit 1 (COI) gene, partial cds; mitochondrial	39.4	39.4	1	0.004	0.95	KY306833.1	315	....A................	335
157Select seq gb|KY306832.1|	Callipterinella calliptera isolate B47-4 cytochrome oxidase subunit 1 (COI) gene, partial cds; mitochondrial	39.4	39.4	1	0.004	0.95	KY306832.1	315	....A................	335
158Select seq gb|KY306831.1|	Callipterinella calliptera isolate B47-3 cytochrome oxidase subunit 1 (COI) gene, partial cds; mitochondrial	39.4	39.4	1	0.004	0.95	KY306831.1	315	....A................	335
159Select seq gb|KY306830.1|	Callipterinella calliptera isolate B47-2 cytochrome oxidase subunit 1 (COI) gene, partial cds; mitochondrial	39.4	39.4	1	0.004	0.95	KY306830.1	315	....A................	335
160Select seq gb|KY306829.1|	Callipterinella calliptera isolate B47-1 cytochrome oxidase subunit 1 (COI) gene, partial cds; mitochondrial	39.4	39.4	1	0.004	0.95	KY306829.1	315	....A................	335
161Select seq gb|KY306825.1|	Calaphis similis isolate B54 cytochrome oxidase subunit 1 (COI) gene, partial cds; mitochondrial	39.4	39.4	1	0.004	0.95	KY306825.1	315	....A................	335
162Select seq gb|KY306822.1|	Calaphis similis isolate B37 cytochrome oxidase subunit 1 (COI) gene, partial cds; mitochondrial	39.4	39.4	1	0.004	0.95	KY306822.1	315	....A................	335
163Select seq gb|KY306814.1|	Calaphis flava isolate US3-4 cytochrome oxidase subunit 1 (COI) gene, partial cds; mitochondrial	39.4	39.4	1	0.004	0.95	KY306814.1	315	....A................	335
164Select seq gb|KY306813.1|	Calaphis flava isolate US3-2 cytochrome oxidase subunit 1 (COI) gene, partial cds; mitochondrial	39.4	39.4	1	0.004	0.95	KY306813.1	315	....A................	335
165Select seq gb|KY306812.1|	Calaphis flava isolate US3-1 cytochrome oxidase subunit 1 (COI) gene, partial cds; mitochondrial	39.4	39.4	1	0.004	0.95	KY306812.1	315	....A................	335
166Select seq gb|KX371822.1|	Aphis aurantii voucher ROToxopaura1-16 cytochrome c oxidase subunit 1 (COX1) gene, partial cds; mitochondrial	39.4	39.4	1	0.004	0.95	KX371822.1	313	....A................	333
167Select seq gb|KX371821.1|	Aphis craccivora voucher ROApcracc2-16 cytochrome c oxidase subunit 1 (COX1) gene, partial cds; mitochondrial	39.4	39.4	1	0.004	0.95	KX371821.1	313	....A................	333
168Select seq gb|KX371819.1|	Aphis punicae voucher ROAppun1-16 cytochrome c oxidase subunit 1 (COX1) gene, partial cds; mitochondrial	39.4	39.4	1	0.004	0.95	KX371819.1	313	....A................	333
169Select seq gb|KX371817.1|	Acyrthosiphon pisum voucher ROAcypis1-16 cytochrome c oxidase subunit 1 (COX1) gene, partial cds; mitochondrial	39.4	39.4	1	0.004	0.95	KX371817.1	313	....A................	333
170Select seq gb|KY000676.1|	Aphis craccivora voucher Apcrac-2016 cytochrome c oxidase subunit 1 (COX1) gene, partial cds; mitochondrial	39.4	39.4	1	0.004	0.95	KY000676.1	313	....A................	333
171Select seq gb|KY000675.1|	Aphis spiraecola voucher Apspir-2016 cytochrome c oxidase subunit 1 (COX1) gene, partial cds; mitochondrial	39.4	39.4	1	0.004	0.95	KY000675.1	313	....A................	333
172Select seq gb|KX054006.1|	Myzus persicae voucher sc_01151 cytochrome oxidase subunit 1 (COI) gene, partial cds; mitochondrial	39.4	39.4	1	0.004	0.95	KX054006.1	309	....A................	329
173Select seq gb|KX053502.1|	Hysteroneura setariae voucher sc_02292 cytochrome oxidase subunit 1 (COI) gene, partial cds; mitochondrial	39.4	39.4	1	0.004	0.95	KX053502.1	176	....A................	196
174Select seq gb|KX053501.1|	Hysteroneura setariae voucher sc_07995 cytochrome oxidase subunit 1 (COI) gene, partial cds; mitochondrial	39.4	39.4	1	0.004	0.95	KX053501.1	174	....A................	194
175Select seq gb|KX051668.1|	Aphis craccivora voucher sc_07789 cytochrome oxidase subunit 1 (COI) gene, partial cds; mitochondrial	39.4	39.4	1	0.004	0.95	KX051668.1	313	....A................	333
176Select seq gb|KX051665.1|	Aphis craccivora voucher sc_04908 cytochrome oxidase subunit 1 (COI) gene, partial cds; mitochondrial	39.4	39.4	1	0.004	0.95	KX051665.1	264	....A................	284
177Select seq gb|KX051663.1|	Aphis craccivora voucher sc_06811 cytochrome oxidase subunit 1 (COI) gene, partial cds; mitochondrial	39.4	39.4	1	0.004	0.95	KX051663.1	93	....A................	113
178Select seq gb|KX051662.1|	Aphis craccivora voucher sc_07264 cytochrome oxidase subunit 1 (COI) gene, partial cds; mitochondrial	39.4	39.4	1	0.004	0.95	KX051662.1	251	....A................	271
179Select seq gb|KX051661.1|	Aphis craccivora voucher sc_07292 cytochrome oxidase subunit 1 (COI) gene, partial cds; mitochondrial	39.4	39.4	1	0.004	0.95	KX051661.1	260	....A................	280
180Select seq gb|KX051659.1|	Aphididae sp. sc_05872 cytochrome oxidase subunit 1 (COI) gene, partial cds; mitochondrial	39.4	39.4	1	0.004	0.95	KX051659.1	313	....A................	333
181Select seq gb|KX051658.1|	Aphididae sp. sc_08230 cytochrome oxidase subunit 1 (COI) gene, partial cds; mitochondrial	39.4	39.4	1	0.004	0.95	KX051658.1	229	....A................	249
182Select seq gb|KX051652.1|	Aphididae sp. sc_05964 cytochrome oxidase subunit 1 (COI) gene, partial cds; mitochondrial	39.4	39.4	1	0.004	0.95	KX051652.1	303	....A................	323
183Select seq gb|KX051651.1|	Aphididae sp. sc_08491 cytochrome oxidase subunit 1 (COI) gene, partial cds; mitochondrial	39.4	39.4	1	0.004	0.95	KX051651.1	313	....A................	333
184Select seq gb|KX051649.1|	Aphididae sp. sc_08490 cytochrome oxidase subunit 1 (COI) gene, partial cds; mitochondrial	39.4	39.4	1	0.004	0.95	KX051649.1	303	....A................	323
185Select seq gb|KX051648.1|	Aphididae sp. sc_04843 cytochrome oxidase subunit 1 (COI) gene, partial cds; mitochondrial	39.4	39.4	1	0.004	0.95	KX051648.1	248	....A................	268
186Select seq gb|KX051646.1|	Aphididae sp. sc_08231 cytochrome oxidase subunit 1 (COI) gene, partial cds; mitochondrial	39.4	39.4	1	0.004	0.95	KX051646.1	313	....A................	333
187Select seq gb|KX051645.1|	Aphididae sp. sc_07378 cytochrome oxidase subunit 1 (COI) gene, partial cds; mitochondrial	39.4	39.4	1	0.004	0.95	KX051645.1	313	....A................	333
188Select seq gb|KX051644.1|	Aphididae sp. sc_07379 cytochrome oxidase subunit 1 (COI) gene, partial cds; mitochondrial	39.4	39.4	1	0.004	0.95	KX051644.1	248	....A................	268
189Select seq gb|KX051642.1|	Aphididae sp. sc_07381 cytochrome oxidase subunit 1 (COI) gene, partial cds; mitochondrial	39.4	39.4	1	0.004	0.95	KX051642.1	313	....A................	333
190Select seq gb|KX051641.1|	Aphididae sp. sc_07394 cytochrome oxidase subunit 1 (COI) gene, partial cds; mitochondrial	39.4	39.4	1	0.004	0.95	KX051641.1	271	....A................	291
191Select seq gb|KX051640.1|	Aphididae sp. sc_08423 cytochrome oxidase subunit 1 (COI) gene, partial cds; mitochondrial	39.4	39.4	1	0.004	0.95	KX051640.1	313	....A................	333
192Select seq gb|KX051639.1|	Aphididae sp. sc_08422 cytochrome oxidase subunit 1 (COI) gene, partial cds; mitochondrial	39.4	39.4	1	0.004	0.95	KX051639.1	246	....A................	266
193Select seq gb|KX051638.1|	Aphididae sp. sc_08421 cytochrome oxidase subunit 1 (COI) gene, partial cds; mitochondrial	39.4	39.4	1	0.004	0.95	KX051638.1	303	....A................	323
194Select seq gb|KX051637.1|	Aphididae sp. sc_10495 cytochrome oxidase subunit 1 (COI) gene, partial cds; mitochondrial	39.4	39.4	1	0.004	0.95	KX051637.1	258	....A................	278
195Select seq gb|KX051635.1|	Aphididae sp. sc_08191 cytochrome oxidase subunit 1 (COI) gene, partial cds; mitochondrial	39.4	39.4	1	0.004	0.95	KX051635.1	245	....A................	265
196Select seq gb|KX051634.1|	Aphididae sp. sc_08192 cytochrome oxidase subunit 1 (COI) gene, partial cds; mitochondrial	39.4	39.4	1	0.004	0.95	KX051634.1	223	....A................	243
197Select seq gb|KX051633.1|	Aphididae sp. sc_08193 cytochrome oxidase subunit 1 (COI) gene, partial cds; mitochondrial	39.4	39.4	1	0.004	0.95	KX051633.1	267	....A................	287
198Select seq gb|KX051632.1|	Aphididae sp. sc_08198 cytochrome oxidase subunit 1 (COI) gene, partial cds; mitochondrial	39.4	39.4	1	0.004	0.95	KX051632.1	305	....A................	325
199Select seq gb|KX051631.1|	Aphididae sp. sc_08200 cytochrome oxidase subunit 1 (COI) gene, partial cds; mitochondrial	39.4	39.4	1	0.004	0.95	KX051631.1	313	....A................	333
200Select seq gb|KX051630.1|	Aphididae sp. sc_06188 cytochrome oxidase subunit 1 (COI) gene, partial cds; mitochondrial	39.4	39.4	1	0.004	0.95	KX051630.1	246	....A................	266
201Select seq gb|KX051629.1|	Aphididae sp. sc_06234 cytochrome oxidase subunit 1 (COI) gene, partial cds; mitochondrial	39.4	39.4	1	0.004	0.95	KX051629.1	313	....A................	333
202Select seq gb|KU754492.1|	Cinara cedri isolate CINC2 cytochrome c oxidase subunit 1 (COI) gene, partial cds; mitochondrial	39.4	39.4	1	0.004	0.95	KU754492.1	313	....A................	333
203Select seq gb|KU754491.1|	Cinara cedri isolate CINC1 cytochrome c oxidase subunit 1 (COI) gene, partial cds; mitochondrial	39.4	39.4	1	0.004	0.95	KU754491.1	305	....A................	325
204Select seq gb|KU567970.1|	Wahlgreniella vaccinii voucher BIOUG07986-D02 cytochrome oxidase subunit 1 (COI) gene, partial cds; mitochondrial	39.4	39.4	1	0.004	0.95	KU567970.1	303	....A................	323
205Select seq gb|KU567969.1|	Macrosiphum euphorbiae voucher BIOUG07984-H11 cytochrome oxidase subunit 1 (COI) gene, partial cds; mitochondrial	39.4	39.4	1	0.004	0.95	KU567969.1	309	....A................	329
206Select seq gb|KU567968.1|	Wahlgreniella vaccinii voucher BIOUG07986-D01 cytochrome oxidase subunit 1 (COI) gene, partial cds; mitochondrial	39.4	39.4	1	0.004	0.95	KU567968.1	303	....A................	323
207Select seq gb|KU567967.1|	Hemiptera sp. BIOUG07983-C11 cytochrome oxidase subunit 1 (COI) gene, partial cds; mitochondrial	39.4	39.4	1	0.004	0.95	KU567967.1	303	....A................	323
208Select seq gb|KU567964.1|	Aphis varians voucher BIOUG07984-F03 cytochrome oxidase subunit 1 (COI) gene, partial cds; mitochondrial	39.4	39.4	1	0.004	0.95	KU567964.1	297	....A................	317
209Select seq gb|KU567962.1|	Aphis varians voucher BIOUG07985-G06 cytochrome oxidase subunit 1 (COI) gene, partial cds; mitochondrial	39.4	39.4	1	0.004	0.95	KU567962.1	313	....A................	333
210Select seq gb|KU567961.1|	Hemiptera sp. BIOUG07983-F09 cytochrome oxidase subunit 1 (COI) gene, partial cds; mitochondrial	39.4	39.4	1	0.004	0.95	KU567961.1	303	....A................	323
211Select seq gb|KU567959.1|	Wahlgreniella vaccinii voucher BIOUG07985-G08 cytochrome oxidase subunit 1 (COI) gene, partial cds; mitochondrial	39.4	39.4	1	0.004	0.95	KU567959.1	303	....A................	323
212Select seq gb|KU567955.1|	Wahlgreniella nervata voucher BIOUG07984-B10 cytochrome oxidase subunit 1 (COI) gene, partial cds; mitochondrial	39.4	39.4	1	0.004	0.95	KU567955.1	303	....A................	323
213Select seq gb|KU567954.1|	Wahlgreniella sp. BIOUG07983-F11 cytochrome oxidase subunit 1 (COI) gene, partial cds; mitochondrial	39.4	39.4	1	0.004	0.95	KU567954.1	303	....A................	323
214Select seq gb|KU567951.1|	Calaphis flava voucher BIOUG07986-H05 cytochrome oxidase subunit 1 (COI) gene, partial cds; mitochondrial	39.4	39.4	1	0.004	0.95	KU567951.1	303	....A................	323
215Select seq gb|KU567941.1|	Wahlgreniella sp. BIOUG07984-H05 cytochrome oxidase subunit 1 (COI) gene, partial cds; mitochondrial	39.4	39.4	1	0.004	0.95	KU567941.1	303	....A................	323
216Select seq gb|KU567939.1|	Macrosiphum euphorbiae voucher BIOUG07984-A08 cytochrome oxidase subunit 1 (COI) gene, partial cds; mitochondrial	39.4	39.4	1	0.004	0.95	KU567939.1	303	....A................	323
217Select seq gb|KU567936.1|	Aphidinae sp. BIOUG07985-A04 cytochrome oxidase subunit 1 (COI) gene, partial cds; mitochondrial	39.4	39.4	1	0.004	0.95	KU567936.1	303	....A................	323
218Select seq gb|KU567934.1|	Cinara laricifex voucher BIOUG07985-B12 cytochrome oxidase subunit 1 (COI) gene, partial cds; mitochondrial	39.4	39.4	1	0.004	0.95	KU567934.1	300	....A................	320
219Select seq gb|KU567930.1|	Illinoia sp. BIOUG07985-E09 cytochrome oxidase subunit 1 (COI) gene, partial cds; mitochondrial	39.4	39.4	1	0.004	0.95	KU567930.1	300	....A................	320
220Select seq gb|KU567929.1|	Macrosiphum sp. BIOUG07985-F01 cytochrome oxidase subunit 1 (COI) gene, partial cds; mitochondrial	39.4	39.4	1	0.004	0.95	KU567929.1	309	....A................	329
221Select seq gb|KU567924.1|	Macrosiphum euphorbiae voucher BIOUG07983-C12 cytochrome oxidase subunit 1 (COI) gene, partial cds; mitochondrial	39.4	39.4	1	0.004	0.95	KU567924.1	313	....A................	333
222Select seq gb|KU567918.1|	Hemiptera sp. BIOUG07984-C04 cytochrome oxidase subunit 1 (COI) gene, partial cds; mitochondrial	39.4	39.4	1	0.004	0.95	KU567918.1	303	....A................	323
223Select seq gb|KU567913.1|	Wahlgreniella vaccinii voucher BIOUG07984-G07 cytochrome oxidase subunit 1 (COI) gene, partial cds; mitochondrial	39.4	39.4	1	0.004	0.95	KU567913.1	303	....A................	323
224Select seq gb|KU567907.1|	Hemiptera sp. BIOUG07985-F03 cytochrome oxidase subunit 1 (COI) gene, partial cds; mitochondrial	39.4	39.4	1	0.004	0.95	KU567907.1	303	....A................	323
225Select seq gb|KU567902.1|	Calaphis flava voucher BIOUG07983-H02 cytochrome oxidase subunit 1 (COI) gene, partial cds; mitochondrial	39.4	39.4	1	0.004	0.95	KU567902.1	300	....A................	320
226Select seq gb|KU567899.1|	Aphis varians voucher BIOUG07985-B02 cytochrome oxidase subunit 1 (COI) gene, partial cds; mitochondrial	39.4	39.4	1	0.004	0.95	KU567899.1	300	....A................	320
227Select seq gb|KU567897.1|	Wahlgreniella vaccinii voucher BIOUG07985-E10 cytochrome oxidase subunit 1 (COI) gene, partial cds; mitochondrial	39.4	39.4	1	0.004	0.95	KU567897.1	303	....A................	323
228Select seq gb|KU567895.1|	Calaphis flava voucher BIOUG07983-D10 cytochrome oxidase subunit 1 (COI) gene, partial cds; mitochondrial	39.4	39.4	1	0.004	0.95	KU567895.1	303	....A................	323
229Select seq gb|KU567889.1|	Wahlgreniella vaccinii voucher BIOUG07983-B01 cytochrome oxidase subunit 1 (COI) gene, partial cds; mitochondrial	39.4	39.4	1	0.004	0.95	KU567889.1	303	....A................	323
230Select seq gb|KU567882.1|	Hemiptera sp. BIOUG07985-E05 cytochrome oxidase subunit 1 (COI) gene, partial cds; mitochondrial	39.4	39.4	1	0.004	0.95	KU567882.1	303	....A................	323
231Select seq gb|KU567875.1|	Macrosiphum euphorbiae voucher BIOUG07983-F07 cytochrome oxidase subunit 1 (COI) gene, partial cds; mitochondrial	39.4	39.4	1	0.004	0.95	KU567875.1	303	....A................	323
232Select seq gb|KU567873.1|	Chaitophorus sp. BIOUG07986-A10 cytochrome oxidase subunit 1 (COI) gene, partial cds; mitochondrial	39.4	39.4	1	0.004	0.95	KU567873.1	249	....A................	269
233Select seq gb|KU567872.1|	Hemiptera sp. BIOUG07984-B02 cytochrome oxidase subunit 1 (COI) gene, partial cds; mitochondrial	39.4	39.4	1	0.004	0.95	KU567872.1	303	....A................	323
234Select seq gb|KU567871.1|	Wahlgreniella sp. BIOUG07983-B03 cytochrome oxidase subunit 1 (COI) gene, partial cds; mitochondrial	39.4	39.4	1	0.004	0.95	KU567871.1	303	....A................	323
235Select seq gb|KU567870.1|	Wahlgreniella nervata voucher BIOUG07983-E01 cytochrome oxidase subunit 1 (COI) gene, partial cds; mitochondrial	39.4	39.4	1	0.004	0.95	KU567870.1	300	....A................	320
236Select seq gb|KU567868.1|	Chaitophorus nigrae voucher BIOUG07986-A11 cytochrome oxidase subunit 1 (COI) gene, partial cds; mitochondrial	39.4	39.4	1	0.004	0.95	KU567868.1	297	....A................	317
237Select seq gb|KU567860.1|	Wahlgreniella vaccinii voucher BIOUG07986-C07 cytochrome oxidase subunit 1 (COI) gene, partial cds; mitochondrial	39.4	39.4	1	0.004	0.95	KU567860.1	303	....A................	323
238Select seq gb|KU567859.1|	Aphis varians voucher BIOUG07985-A05 cytochrome oxidase subunit 1 (COI) gene, partial cds; mitochondrial	39.4	39.4	1	0.004	0.95	KU567859.1	303	....A................	323
239Select seq gb|KU567855.1|	Macrosiphum euphorbiae voucher BIOUG07984-G12 cytochrome oxidase subunit 1 (COI) gene, partial cds; mitochondrial	39.4	39.4	1	0.004	0.95	KU567855.1	309	....A................	329
240Select seq gb|KU567850.1|	Macrosiphum valerianae voucher BIOUG07984-E10 cytochrome oxidase subunit 1 (COI) gene, partial cds; mitochondrial	39.4	39.4	1	0.004	0.95	KU567850.1	303	....A................	323
241Select seq gb|KU567848.1|	Hemiptera sp. BIOUG07985-D10 cytochrome oxidase subunit 1 (COI) gene, partial cds; mitochondrial	39.4	39.4	1	0.004	0.95	KU567848.1	303	....A................	323
242Select seq gb|KU567846.1|	Calaphis flava voucher BIOUG07983-D08 cytochrome oxidase subunit 1 (COI) gene, partial cds; mitochondrial	39.4	39.4	1	0.004	0.95	KU567846.1	313	....A................	333
243Select seq gb|KU567845.1|	Macrosiphum euphorbiae voucher BIOUG07983-G02 cytochrome oxidase subunit 1 (COI) gene, partial cds; mitochondrial	39.4	39.4	1	0.004	0.95	KU567845.1	303	....A................	323
244Select seq gb|KU567844.1|	Cinara laricifex voucher BIOUG07985-F02 cytochrome oxidase subunit 1 (COI) gene, partial cds; mitochondrial	39.4	39.4	1	0.004	0.95	KU567844.1	303	....A................	323
245Select seq gb|KU567843.1|	Hemiptera sp. BIOUG07984-H09 cytochrome oxidase subunit 1 (COI) gene, partial cds; mitochondrial	39.4	39.4	1	0.004	0.95	KU567843.1	303	....A................	323
246Select seq gb|KU567837.1|	Hemiptera sp. BIOUG07986-G10 cytochrome oxidase subunit 1 (COI) gene, partial cds; mitochondrial	39.4	39.4	1	0.004	0.95	KU567837.1	303	....A................	323
247Select seq gb|KU567836.1|	Hemiptera sp. BIOUG07984-B04 cytochrome oxidase subunit 1 (COI) gene, partial cds; mitochondrial	39.4	39.4	1	0.004	0.95	KU567836.1	303	....A................	323
248Select seq gb|KU567835.1|	Chaitophorus nigrae voucher BIOUG07986-A09 cytochrome oxidase subunit 1 (COI) gene, partial cds; mitochondrial	39.4	39.4	1	0.004	0.95	KU567835.1	303	....A................	323
249Select seq gb|KU567833.1|	Wahlgreniella sp. BIOUG07983-H01 cytochrome oxidase subunit 1 (COI) gene, partial cds; mitochondrial	39.4	39.4	1	0.004	0.95	KU567833.1	303	....A................	323
250Select seq gb|KU567831.1|	Aphidinae sp. BIOUG07984-G06 cytochrome oxidase subunit 1 (COI) gene, partial cds; mitochondrial	39.4	39.4	1	0.004	0.95	KU567831.1	303	....A................	323
251Select seq gb|KU567830.1|	Wahlgreniella nervata voucher BIOUG07984-B03 cytochrome oxidase subunit 1 (COI) gene, partial cds; mitochondrial	39.4	39.4	1	0.004	0.95	KU567830.1	300	....A................	320
252Select seq gb|KU567829.1|	Wahlgreniella sp. BIOUG07984-H10 cytochrome oxidase subunit 1 (COI) gene, partial cds; mitochondrial	39.4	39.4	1	0.004	0.95	KU567829.1	303	....A................	323
253Select seq gb|KU567828.1|	Wahlgreniella vaccinii voucher BIOUG07983-G10 cytochrome oxidase subunit 1 (COI) gene, partial cds; mitochondrial	39.4	39.4	1	0.004	0.95	KU567828.1	313	....A................	333
254Select seq gb|KU567825.1|	Wahlgreniella sp. BIOUG07984-D11 cytochrome oxidase subunit 1 (COI) gene, partial cds; mitochondrial	39.4	39.4	1	0.004	0.95	KU567825.1	303	....A................	323
255Select seq gb|KU567824.1|	Acyrthosiphon churchillense voucher BIOUG07985-F05 cytochrome oxidase subunit 1 (COI) gene, partial cds; mitochondrial	39.4	39.4	1	0.004	0.95	KU567824.1	303	....A................	323
256Select seq gb|KU567817.1|	Calaphis flava voucher BIOUG07985-E12 cytochrome oxidase subunit 1 (COI) gene, partial cds; mitochondrial	39.4	39.4	1	0.004	0.95	KU567817.1	303	....A................	323
257Select seq gb|KU567814.1|	Chaitophorus nigrae voucher BIOUG07985-C11 cytochrome oxidase subunit 1 (COI) gene, partial cds; mitochondrial	39.4	39.4	1	0.004	0.95	KU567814.1	309	....A................	329
258Select seq gb|KU567812.1|	Wahlgreniella nervata voucher BIOUG07983-B07 cytochrome oxidase subunit 1 (COI) gene, partial cds; mitochondrial	39.4	39.4	1	0.004	0.95	KU567812.1	303	....A................	323
259Select seq gb|KU567808.1|	Wahlgreniella nervata voucher BIOUG07983-D02 cytochrome oxidase subunit 1 (COI) gene, partial cds; mitochondrial	39.4	39.4	1	0.004	0.95	KU567808.1	303	....A................	323
260Select seq gb|KU567806.1|	Aphidinae sp. BIOUG07984-C05 cytochrome oxidase subunit 1 (COI) gene, partial cds; mitochondrial	39.4	39.4	1	0.004	0.95	KU567806.1	309	....A................	329
261Select seq gb|KU567800.1|	Wahlgreniella sp. BIOUG07983-G08 cytochrome oxidase subunit 1 (COI) gene, partial cds; mitochondrial	39.4	39.4	1	0.004	0.95	KU567800.1	313	....A................	333
262Select seq gb|KU567797.1|	Chaitophorus pusillus voucher BIOUG07985-E02 cytochrome oxidase subunit 1 (COI) gene, partial cds; mitochondrial	39.4	39.4	1	0.004	0.95	KU567797.1	291	....A................	311
263Select seq gb|KU567796.1|	Aphidinae sp. BIOUG07983-B04 cytochrome oxidase subunit 1 (COI) gene, partial cds; mitochondrial	39.4	39.4	1	0.004	0.95	KU567796.1	303	....A................	323
264Select seq gb|KU567791.1|	Calaphis flava voucher BIOUG07985-D11 cytochrome oxidase subunit 1 (COI) gene, partial cds; mitochondrial	39.4	39.4	1	0.004	0.95	KU567791.1	309	....A................	329
265Select seq gb|KU567789.1|	Wahlgreniella vaccinii voucher BIOUG07983-A12 cytochrome oxidase subunit 1 (COI) gene, partial cds; mitochondrial	39.4	39.4	1	0.004	0.95	KU567789.1	291	....A................	311
266Select seq gb|KU567783.1|	Aphidinae sp. BIOUG07983-D06 cytochrome oxidase subunit 1 (COI) gene, partial cds; mitochondrial	39.4	39.4	1	0.004	0.95	KU567783.1	303	....A................	323
267Select seq gb|KU567782.1|	Wahlgreniella sp. BIOUG07983-D03 cytochrome oxidase subunit 1 (COI) gene, partial cds; mitochondrial	39.4	39.4	1	0.004	0.95	KU567782.1	300	....A................	320
268Select seq gb|KU567780.1|	Macrosiphum euphorbiae voucher BIOUG07984-B06 cytochrome oxidase subunit 1 (COI) gene, partial cds; mitochondrial	39.4	39.4	1	0.004	0.95	KU567780.1	303	....A................	323
269Select seq gb|KU567779.1|	Hemiptera sp. BIOUG07983-H06 cytochrome oxidase subunit 1 (COI) gene, partial cds; mitochondrial	39.4	39.4	1	0.004	0.95	KU567779.1	303	....A................	323
270Select seq gb|KU567773.1|	Macrosiphum euphorbiae voucher BIOUG07984-G09 cytochrome oxidase subunit 1 (COI) gene, partial cds; mitochondrial	39.4	39.4	1	0.004	0.95	KU567773.1	309	....A................	329
271Select seq gb|KU567769.1|	Macrosiphum euphorbiae voucher BIOUG07985-D09 cytochrome oxidase subunit 1 (COI) gene, partial cds; mitochondrial	39.4	39.4	1	0.004	0.95	KU567769.1	303	....A................	323
272Select seq gb|KU567767.1|	Wahlgreniella sp. BIOUG07983-D07 cytochrome oxidase subunit 1 (COI) gene, partial cds; mitochondrial	39.4	39.4	1	0.004	0.95	KU567767.1	303	....A................	323
273Select seq gb|KU567766.1|	Wahlgreniella sp. BIOUG07983-B05 cytochrome oxidase subunit 1 (COI) gene, partial cds; mitochondrial	39.4	39.4	1	0.004	0.95	KU567766.1	303	....A................	323
274Select seq gb|KU567765.1|	Hemiptera sp. BIOUG07983-A09 cytochrome oxidase subunit 1 (COI) gene, partial cds; mitochondrial	39.4	39.4	1	0.004	0.95	KU567765.1	313	....A................	333
275Select seq gb|KU567763.1|	Aphis varians voucher BIOUG07986-E08 cytochrome oxidase subunit 1 (COI) gene, partial cds; mitochondrial	39.4	39.4	1	0.004	0.95	KU567763.1	303	....A................	323
276Select seq gb|KU567760.1|	Calaphis flava voucher BIOUG07986-G11 cytochrome oxidase subunit 1 (COI) gene, partial cds; mitochondrial	39.4	39.4	1	0.004	0.95	KU567760.1	303	....A................	323
277Select seq gb|KU567758.1|	Calaphis flava voucher BIOUG07985-D12 cytochrome oxidase subunit 1 (COI) gene, partial cds; mitochondrial	39.4	39.4	1	0.004	0.95	KU567758.1	309	....A................	329
278Select seq gb|KU567757.1|	Wahlgreniella sp. BIOUG07985-C05 cytochrome oxidase subunit 1 (COI) gene, partial cds; mitochondrial	39.4	39.4	1	0.004	0.95	KU567757.1	276	....A................	296
279Select seq gb|KU567755.1|	Calaphis flava voucher BIOUG07983-A06 cytochrome oxidase subunit 1 (COI) gene, partial cds; mitochondrial	39.4	39.4	1	0.004	0.95	KU567755.1	303	....A................	323
280Select seq gb|KU567754.1|	Macrosiphum euphorbiae voucher BIOUG07985-H01 cytochrome oxidase subunit 1 (COI) gene, partial cds; mitochondrial	39.4	39.4	1	0.004	0.95	KU567754.1	313	....A................	333
281Select seq gb|KU567746.1|	Hemiptera sp. BIOUG07984-A06 cytochrome oxidase subunit 1 (COI) gene, partial cds; mitochondrial	39.4	39.4	1	0.004	0.95	KU567746.1	303	....A................	323
282Select seq gb|KU567745.1|	Macrosiphum euphorbiae voucher BIOUG07985-E01 cytochrome oxidase subunit 1 (COI) gene, partial cds; mitochondrial	39.4	39.4	1	0.004	0.95	KU567745.1	303	....A................	323
283Select seq gb|KU567740.1|	Macrosiphum euphorbiae voucher BIOUG07985-H06 cytochrome oxidase subunit 1 (COI) gene, partial cds; mitochondrial	39.4	39.4	1	0.004	0.95	KU567740.1	303	....A................	323
284Select seq gb|KU567739.1|	Calaphis flava voucher BIOUG07983-C06 cytochrome oxidase subunit 1 (COI) gene, partial cds; mitochondrial	39.4	39.4	1	0.004	0.95	KU567739.1	310	....A................	330
285Select seq gb|KU567731.1|	Calaphis flava voucher BIOUG07985-H05 cytochrome oxidase subunit 1 (COI) gene, partial cds; mitochondrial	39.4	39.4	1	0.004	0.95	KU567731.1	303	....A................	323
286Select seq gb|KU567727.1|	Aphis astragalina voucher BIOUG07986-H11 cytochrome oxidase subunit 1 (COI) gene, partial cds; mitochondrial	39.4	39.4	1	0.004	0.95	KU567727.1	303	....A................	323
287Select seq gb|KU567726.1|	Macrosiphum euphorbiae voucher BIOUG07985-H03 cytochrome oxidase subunit 1 (COI) gene, partial cds; mitochondrial	39.4	39.4	1	0.004	0.95	KU567726.1	303	....A................	323
288Select seq gb|KU567724.1|	Wahlgreniella vaccinii voucher BIOUG07983-G05 cytochrome oxidase subunit 1 (COI) gene, partial cds; mitochondrial	39.4	39.4	1	0.004	0.95	KU567724.1	303	....A................	323
289Select seq gb|KU567723.1|	Macrosiphum euphorbiae voucher BIOUG07985-E08 cytochrome oxidase subunit 1 (COI) gene, partial cds; mitochondrial	39.4	39.4	1	0.004	0.95	KU567723.1	303	....A................	323
290Select seq gb|KU567720.1|	Hemiptera sp. BIOUG07983-C03 cytochrome oxidase subunit 1 (COI) gene, partial cds; mitochondrial	39.4	39.4	1	0.004	0.95	KU567720.1	303	....A................	323
291Select seq gb|KU567719.1|	Calaphis flava voucher BIOUG07983-E08 cytochrome oxidase subunit 1 (COI) gene, partial cds; mitochondrial	39.4	39.4	1	0.004	0.95	KU567719.1	303	....A................	323
292Select seq gb|KU567717.1|	Macrosiphum euphorbiae voucher BIOUG07986-C09 cytochrome oxidase subunit 1 (COI) gene, partial cds; mitochondrial	39.4	39.4	1	0.004	0.95	KU567717.1	303	....A................	323
293Select seq gb|KU567716.1|	Calaphis flava voucher BIOUG07986-C05 cytochrome oxidase subunit 1 (COI) gene, partial cds; mitochondrial	39.4	39.4	1	0.004	0.95	KU567716.1	303	....A................	323
294Select seq gb|KU567715.1|	Aphis varians voucher BIOUG07985-G10 cytochrome oxidase subunit 1 (COI) gene, partial cds; mitochondrial	39.4	39.4	1	0.004	0.95	KU567715.1	303	....A................	323
295Select seq gb|KU567712.1|	Wahlgreniella nervata voucher BIOUG07983-F06 cytochrome oxidase subunit 1 (COI) gene, partial cds; mitochondrial	39.4	39.4	1	0.004	0.95	KU567712.1	303	....A................	323
296Select seq gb|KU567711.1|	Macrosiphum valerianae voucher BIOUG07986-E09 cytochrome oxidase subunit 1 (COI) gene, partial cds; mitochondrial	39.4	39.4	1	0.004	0.95	KU567711.1	303	....A................	323
297Select seq gb|KU567710.1|	Calaphis flava voucher BIOUG07984-C12 cytochrome oxidase subunit 1 (COI) gene, partial cds; mitochondrial	39.4	39.4	1	0.004	0.95	KU567710.1	303	....A................	323
298Select seq gb|KU567709.1|	Calaphis flava voucher BIOUG07984-B11 cytochrome oxidase subunit 1 (COI) gene, partial cds; mitochondrial	39.4	39.4	1	0.004	0.95	KU567709.1	303	....A................	323
299Select seq gb|KU567707.1|	Hemiptera sp. BIOUG07986-B03 cytochrome oxidase subunit 1 (COI) gene, partial cds; mitochondrial	39.4	39.4	1	0.004	0.95	KU567707.1	303	....A................	323
300Select seq gb|KU567705.1|	Aphis varians voucher BIOUG07985-A06 cytochrome oxidase subunit 1 (COI) gene, partial cds; mitochondrial	39.4	39.4	1	0.004	0.95	KU567705.1	300	....A................	320
301Select seq gb|KU567704.1|	Aphidinae sp. BIOUG07985-H04 cytochrome oxidase subunit 1 (COI) gene, partial cds; mitochondrial	39.4	39.4	1	0.004	0.95	KU567704.1	303	....A................	323
302Select seq gb|KU567703.1|	Cinara laricifex voucher BIOUG07985-B11 cytochrome oxidase subunit 1 (COI) gene, partial cds; mitochondrial	39.4	39.4	1	0.004	0.95	KU567703.1	303	....A................	323
303Select seq gb|KU567701.1|	Macrosiphum euphorbiae voucher BIOUG07983-F08 cytochrome oxidase subunit 1 (COI) gene, partial cds; mitochondrial	39.4	39.4	1	0.004	0.95	KU567701.1	303	....A................	323
304Select seq gb|KU567700.1|	Illinoia sp. BIOUG07985-E11 cytochrome oxidase subunit 1 (COI) gene, partial cds; mitochondrial	39.4	39.4	1	0.004	0.95	KU567700.1	303	....A................	323
305Select seq gb|KU567697.1|	Macrosiphum euphorbiae voucher BIOUG07985-E03 cytochrome oxidase subunit 1 (COI) gene, partial cds; mitochondrial	39.4	39.4	1	0.004	0.95	KU567697.1	303	....A................	323
306Select seq gb|KU567695.1|	Calaphis flava voucher BIOUG07984-F09 cytochrome oxidase subunit 1 (COI) gene, partial cds; mitochondrial	39.4	39.4	1	0.004	0.95	KU567695.1	303	....A................	323
307Select seq gb|KU567694.1|	Calaphis flava voucher BIOUG07984-C08 cytochrome oxidase subunit 1 (COI) gene, partial cds; mitochondrial	39.4	39.4	1	0.004	0.95	KU567694.1	303	....A................	323
308Select seq gb|KU567692.1|	Illinoia sp. BIOUG07985-B10 cytochrome oxidase subunit 1 (COI) gene, partial cds; mitochondrial	39.4	39.4	1	0.004	0.95	KU567692.1	303	....A................	323
309Select seq gb|KU567691.1|	Calaphis flava voucher BIOUG07983-B08 cytochrome oxidase subunit 1 (COI) gene, partial cds; mitochondrial	39.4	39.4	1	0.004	0.95	KU567691.1	303	....A................	323
310Select seq gb|KU567690.1|	Calaphis flava voucher BIOUG07986-G07 cytochrome oxidase subunit 1 (COI) gene, partial cds; mitochondrial	39.4	39.4	1	0.004	0.95	KU567690.1	303	....A................	323
311Select seq gb|KU321598.1|	Cinara cedri isolate FB092015 cytochrome oxidase subunit I (COI) gene, partial cds; mitochondrial	39.4	39.4	1	0.004	0.95	KU321598.1	313	....A................	333
312Select seq gb|KP722582.1|	Eriosoma lanigerum voucher ZMIOZ15411 mitochondrion, complete genome	39.4	39.4	1	0.004	0.95	KP722582.1	351	....A................	371
313Select seq gb|KP722576.1|	Mindarus keteleerifoliae voucher ZMIOZ23591 mitochondrion, complete genome	39.4	39.4	1	0.004	0.95	KP722576.1	351	....A................	371
314Select seq gb|KP722590.1|	Aiceona himalaica voucher ZMIOZ16271 mitochondrion, partial genome	39.4	39.4	1	0.004	0.95	KP722590.1	351	....A................	371
315Select seq gb|KP722584.1|	Chaitophorus saliniger voucher ZMIOZ23572 mitochondrion, partial genome	39.4	39.4	1	0.004	0.95	KP722584.1	351	....A................	371
316Select seq gb|KP722580.1|	Greenidea kuwanai voucher ZMIOZ20488 mitochondrion, partial genome	39.4	39.4	1	0.004	0.95	KP722580.1	351	....A................	371
317Select seq gb|KP722578.1|	Kurisakia onigurumii voucher ZMIOZ13303 mitochondrion, partial genome	39.4	39.4	1	0.004	0.95	KP722578.1	351	....A................	371
318Select seq gb|KP722577.1|	Macropodaphis sp. YW-2015 mitochondrion, partial genome	39.4	39.4	1	0.004	0.95	KP722577.1	351	....A................	371
319Select seq gb|KP722575.1|	Myzus persicae voucher ZMIOZ24385 mitochondrion, partial genome	39.4	39.4	1	0.004	0.95	KP722575.1	351	....A................	371
320Select seq gb|KP722574.1|	Neothoracaphis yanonis voucher ZMIOZY8970 mitochondrion, partial genome	39.4	39.4	1	0.004	0.95	KP722574.1	351	....A................	371
321Select seq gb|KP722571.1|	Phloeomyzus passerinii voucher ZMIOZ14260 mitochondrion, partial genome	39.4	39.4	1	0.004	0.95	KP722571.1	351	....A................	371
322Select seq gb|KP722569.1|	Saltusaphis sp. YW-2015 mitochondrion, partial genome	39.4	39.4	1	0.004	0.95	KP722569.1	351	....A................	371
323Select seq gb|KP722568.1|	Takecallis arundinariae voucher ZMIOZ27398 mitochondrion, partial genome	39.4	39.4	1	0.004	0.95	KP722568.1	351	....A................	371
324Select seq gb|KY064246.1|	Cinara nr. spiculosa 3417 cytochrome oxidase subunit I (COI) gene, partial cds; mitochondrial	39.4	39.4	1	0.004	0.95	KY064246.1	315	....A................	335
325Select seq gb|KY064245.1|	Cinara pseudotaxifoliae voucher 3416 cytochrome oxidase subunit I (COI) gene, partial cds; mitochondrial	39.4	39.4	1	0.004	0.95	KY064245.1	289	....A................	309
326Select seq gb|KY064242.1|	Cinara laricifoliae voucher 3411 cytochrome oxidase subunit I (COI) gene, partial cds; mitochondrial	39.4	39.4	1	0.004	0.95	KY064242.1	315	....A................	335
327Select seq gb|KY064240.1|	Cinara contortae voucher 3409 cytochrome oxidase subunit I (COI) gene, partial cds; mitochondrial	39.4	39.4	1	0.004	0.95	KY064240.1	315	....A................	335
328Select seq gb|KY064238.1|	Cinara pseudotaxifoliae voucher 3407 cytochrome oxidase subunit I (COI) gene, partial cds; mitochondrial	39.4	39.4	1	0.004	0.95	KY064238.1	315	....A................	335
329Select seq gb|KY064237.1|	Cinara cf. splendens/pseudotsugae 3406 cytochrome oxidase subunit I (COI) gene, partial cds; mitochondrial	39.4	39.4	1	0.004	0.95	KY064237.1	315	....A................	335
330Select seq gb|KY064236.1|	Cinara cf. laricifoliae/lyallii 3405 cytochrome oxidase subunit I (COI) gene, partial cds; mitochondrial	39.4	39.4	1	0.004	0.95	KY064236.1	315	....A................	335
331Select seq gb|KY064232.1|	Cinara cf. laricifoliae/lyallii 3401 cytochrome oxidase subunit I (COI) gene, partial cds; mitochondrial	39.4	39.4	1	0.004	0.95	KY064232.1	315	....A................	335
332Select seq gb|KY064230.1|	Cinara brevispinosa voucher 3397 cytochrome oxidase subunit I (COI) gene, partial cds; mitochondrial	39.4	39.4	1	0.004	0.95	KY064230.1	315	....A................	335
333Select seq gb|KY064229.1|	Cinara nigra voucher 3393 cytochrome oxidase subunit I (COI) gene, partial cds; mitochondrial	39.4	39.4	1	0.004	0.95	KY064229.1	315	....A................	335
334Select seq gb|KY064227.1|	Cinara pseudotaxifoliae voucher 3391 cytochrome oxidase subunit I (COI) gene, partial cds; mitochondrial	39.4	39.4	1	0.004	0.95	KY064227.1	315	....A................	335
335Select seq gb|KY064226.1|	Cinara cf. splendens/pseudotsugae 3390 cytochrome oxidase subunit I (COI) gene, partial cds; mitochondrial	39.4	39.4	1	0.004	0.95	KY064226.1	315	....A................	335
336Select seq gb|KY064225.1|	Cinara pergandei voucher 3389 cytochrome oxidase subunit I (COI) gene, partial cds; mitochondrial	39.4	39.4	1	0.004	0.95	KY064225.1	315	....A................	335
337Select seq gb|KY064224.1|	Cinara brevispinosa voucher 3388 cytochrome oxidase subunit I (COI) gene, partial cds; mitochondrial	39.4	39.4	1	0.004	0.95	KY064224.1	310	....A................	330
338Select seq gb|KY064223.1|	Cinara cf. kuchea/hirsuta 3387 cytochrome oxidase subunit I (COI) gene, partial cds; mitochondrial	39.4	39.4	1	0.004	0.95	KY064223.1	315	....A................	335
339Select seq gb|KY064222.1|	Cinara cf. splendens/pseudotsugae 3386 cytochrome oxidase subunit I (COI) gene, partial cds; mitochondrial	39.4	39.4	1	0.004	0.95	KY064222.1	315	....A................	335
340Select seq gb|KY064221.1|	Cinara pseudotaxifoliae voucher 3385 cytochrome oxidase subunit I (COI) gene, partial cds; mitochondrial	39.4	39.4	1	0.004	0.95	KY064221.1	315	....A................	335
341Select seq gb|KY064220.1|	Cinara pseudotaxifoliae voucher 3384 cytochrome oxidase subunit I (COI) gene, partial cds; mitochondrial	39.4	39.4	1	0.004	0.95	KY064220.1	315	....A................	335
342Select seq gb|KY064219.1|	Cinara cf. obscura/pallidipes 3382 cytochrome oxidase subunit I (COI) gene, partial cds; mitochondrial	39.4	39.4	1	0.004	0.95	KY064219.1	315	....A................	335
343Select seq gb|KY064217.1|	Cinara nigra voucher 3380 cytochrome oxidase subunit I (COI) gene, partial cds; mitochondrial	39.4	39.4	1	0.004	0.95	KY064217.1	284	....A................	304
344Select seq gb|KY064215.1|	Cinara cf. splendens/pseudotsugae 3378 cytochrome oxidase subunit I (COI) gene, partial cds; mitochondrial	39.4	39.4	1	0.004	0.95	KY064215.1	315	....A................	335
345Select seq gb|KY064214.1|	Cinara pinea voucher 3377 cytochrome oxidase subunit I (COI) gene, partial cds; mitochondrial	39.4	39.4	1	0.004	0.95	KY064214.1	315	....A................	335
346Select seq gb|KY064212.1|	Cinara contortae voucher 3375 cytochrome oxidase subunit I (COI) gene, partial cds; mitochondrial	39.4	39.4	1	0.004	0.95	KY064212.1	315	....A................	335
347Select seq gb|KY064210.1|	Cinara thatcheri voucher 3373 cytochrome oxidase subunit I (COI) gene, partial cds; mitochondrial	39.4	39.4	1	0.004	0.95	KY064210.1	315	....A................	335
348Select seq gb|KY064209.1|	Cinara sp. 3371 cytochrome oxidase subunit I (COI) gene, partial cds; mitochondrial	39.4	39.4	1	0.004	0.95	KY064209.1	314	....A................	334
349Select seq gb|KY064207.1|	Cinara oregonensis voucher 3369 cytochrome oxidase subunit I (COI) gene, partial cds; mitochondrial	39.4	39.4	1	0.004	0.95	KY064207.1	315	....A................	335
350Select seq gb|KY064206.1|	Cinara brevispinosa voucher 3368 cytochrome oxidase subunit I (COI) gene, partial cds; mitochondrial	39.4	39.4	1	0.004	0.95	KY064206.1	315	....A................	335
351Select seq gb|KY064205.1|	Cinara pseudotaxifoliae voucher 3366 cytochrome oxidase subunit I (COI) gene, partial cds; mitochondrial	39.4	39.4	1	0.004	0.95	KY064205.1	315	....A................	335
352Select seq gb|KY064204.1|	Cinara medispinosa voucher 3365 cytochrome oxidase subunit I (COI) gene, partial cds; mitochondrial	39.4	39.4	1	0.004	0.95	KY064204.1	315	....A................	335
353Select seq gb|KY064203.1|	Cinara medispinosa voucher 3364 cytochrome oxidase subunit I (COI) gene, partial cds; mitochondrial	39.4	39.4	1	0.004	0.95	KY064203.1	315	....A................	335
354Select seq gb|KY064202.1|	Cinara pseudotaxifoliae voucher 3363 cytochrome oxidase subunit I (COI) gene, partial cds; mitochondrial	39.4	39.4	1	0.004	0.95	KY064202.1	315	....A................	335
355Select seq gb|KY064200.1|	Cinara contortae voucher 3360 cytochrome oxidase subunit I (COI) gene, partial cds; mitochondrial	39.4	39.4	1	0.004	0.95	KY064200.1	315	....A................	335
356Select seq gb|KY064197.1|	Cinara oregonensis voucher 3355 cytochrome oxidase subunit I (COI) gene, partial cds; mitochondrial	39.4	39.4	1	0.004	0.95	KY064197.1	284	....A................	304
357Select seq gb|KY064196.1|	Cinara brevispinosa voucher 3353 cytochrome oxidase subunit I (COI) gene, partial cds; mitochondrial	39.4	39.4	1	0.004	0.95	KY064196.1	315	....A................	335
358Select seq gb|KY064195.1|	Cinara nigra voucher 3352 cytochrome oxidase subunit I (COI) gene, partial cds; mitochondrial	39.4	39.4	1	0.004	0.95	KY064195.1	315	....A................	335
359Select seq gb|KY064194.1|	Cinara sp. 3348 cytochrome oxidase subunit I (COI) gene, partial cds; mitochondrial	39.4	39.4	1	0.004	0.95	KY064194.1	284	....A................	304
360Select seq gb|KY064191.1|	Cinara pseudotaxifoliae voucher 3343 cytochrome oxidase subunit I (COI) gene, partial cds; mitochondrial	39.4	39.4	1	0.004	0.95	KY064191.1	315	....A................	335
361Select seq gb|KY064189.1|	Cinara edulis voucher 3341 cytochrome oxidase subunit I (COI) gene, partial cds; mitochondrial	39.4	39.4	1	0.004	0.95	KY064189.1	315	....A................	335
362Select seq gb|KY064188.1|	Cinara wahtolca voucher 3340 cytochrome oxidase subunit I (COI) gene, partial cds; mitochondrial	39.4	39.4	1	0.004	0.95	KY064188.1	315	....A................	335
363Select seq gb|KY064187.1|	Cinara edulis voucher 3339 cytochrome oxidase subunit I (COI) gene, partial cds; mitochondrial	39.4	39.4	1	0.004	0.95	KY064187.1	315	....A................	335
364Select seq gb|KY064185.1|	Cinara edulis voucher 3335 cytochrome oxidase subunit I (COI) gene, partial cds; mitochondrial	39.4	39.4	1	0.004	0.95	KY064185.1	315	....A................	335
365Select seq gb|KY064184.1|	Cinara terminalis voucher 3334 cytochrome oxidase subunit I (COI) gene, partial cds; mitochondrial	39.4	39.4	1	0.004	0.95	KY064184.1	315	....A................	335
366Select seq gb|KX381977.1|	Brachycaudus helichrysi voucher Bh680 cytochrome oxidase subunit I (COI) gene, partial cds; mitochondrial	39.4	39.4	1	0.004	0.95	KX381977.1	280	....A................	300
367Select seq gb|KX381975.1|	Brachycaudus helichrysi voucher Bh676 cytochrome oxidase subunit I (COI) gene, partial cds; mitochondrial	39.4	39.4	1	0.004	0.95	KX381975.1	280	....A................	300
368Select seq gb|KX381964.1|	Brachycaudus helichrysi voucher Bh660 cytochrome oxidase subunit I (COI) gene, partial cds; mitochondrial	39.4	39.4	1	0.004	0.95	KX381964.1	280	....A................	300
369Select seq gb|KX381957.1|	Brachycaudus helichrysi voucher Bh608 cytochrome oxidase subunit I (COI) gene, partial cds; mitochondrial	39.4	39.4	1	0.004	0.95	KX381957.1	280	....A................	300
370Select seq gb|KX381953.1|	Brachycaudus helichrysi voucher Bh603 cytochrome oxidase subunit I (COI) gene, partial cds; mitochondrial	39.4	39.4	1	0.004	0.95	KX381953.1	280	....A................	300
371Select seq gb|KX381945.1|	Brachycaudus helichrysi voucher Bh568 cytochrome oxidase subunit I (COI) gene, partial cds; mitochondrial	39.4	39.4	1	0.004	0.95	KX381945.1	280	....A................	300
372Select seq gb|KX381944.1|	Brachycaudus helichrysi voucher Bh568 cytochrome oxidase subunit I (COI) gene, partial cds; mitochondrial	39.4	39.4	1	0.004	0.95	KX381944.1	280	....A................	300
373Select seq gb|KX381935.1|	Brachycaudus helichrysi voucher Bh563 cytochrome oxidase subunit I (COI) gene, partial cds; mitochondrial	39.4	39.4	1	0.004	0.95	KX381935.1	280	....A................	300
374Select seq gb|KX381934.1|	Brachycaudus helichrysi voucher Bh563 cytochrome oxidase subunit I (COI) gene, partial cds; mitochondrial	39.4	39.4	1	0.004	0.95	KX381934.1	280	....A................	300
375Select seq gb|KX381913.1|	Brachycaudus helichrysi voucher Bh349 cytochrome oxidase subunit I (COI) gene, partial cds; mitochondrial	39.4	39.4	1	0.004	0.95	KX381913.1	280	....A................	300
376Select seq gb|KX381894.1|	Brachycaudus helichrysi voucher Bh144 cytochrome oxidase subunit I (COI) gene, partial cds; mitochondrial	39.4	39.4	1	0.004	0.95	KX381894.1	280	....A................	300
377Select seq gb|KX381890.1|	Brachycaudus helichrysi voucher Bh135 cytochrome oxidase subunit I (COI) gene, partial cds; mitochondrial	39.4	39.4	1	0.004	0.95	KX381890.1	280	....A................	300
378Select seq gb|KX381886.1|	Brachycaudus helichrysi voucher Bh109 cytochrome oxidase subunit I (COI) gene, partial cds; mitochondrial	39.4	39.4	1	0.004	0.95	KX381886.1	280	....A................	300
379Select seq gb|KX381885.1|	Brachycaudus helichrysi voucher Bh103 cytochrome oxidase subunit I (COI) gene, partial cds; mitochondrial	39.4	39.4	1	0.004	0.95	KX381885.1	280	....A................	300
380Select seq gb|KX381883.1|	Brachycaudus helichrysi voucher Bh100 cytochrome oxidase subunit I (COI) gene, partial cds; mitochondrial	39.4	39.4	1	0.004	0.95	KX381883.1	280	....A................	300
381Select seq gb|KX381881.1|	Brachycaudus helichrysi voucher 761 cytochrome oxidase subunit I (COI) gene, partial cds; mitochondrial	39.4	39.4	1	0.004	0.95	KX381881.1	280	....A................	300
382Select seq gb|KX381880.1|	Brachycaudus helichrysi voucher 705 cytochrome oxidase subunit I (COI) gene, partial cds; mitochondrial	39.4	39.4	1	0.004	0.95	KX381880.1	280	....A................	300
383Select seq gb|KX381878.1|	Brachycaudus helichrysi voucher 3102 cytochrome oxidase subunit I (COI) gene, partial cds; mitochondrial	39.4	39.4	1	0.004	0.95	KX381878.1	280	....A................	300
384Select seq gb|KX381877.1|	Brachycaudus helichrysi voucher 3102 cytochrome oxidase subunit I (COI) gene, partial cds; mitochondrial	39.4	39.4	1	0.004	0.95	KX381877.1	280	....A................	300
385Select seq gb|KX381872.1|	Brachycaudus helichrysi voucher 2598 cytochrome oxidase subunit I (COI) gene, partial cds; mitochondrial	39.4	39.4	1	0.004	0.95	KX381872.1	280	....A................	300
386Select seq gb|KX381870.1|	Brachycaudus spiraeae voucher 2586 cytochrome oxidase subunit I (COI) gene, partial cds; mitochondrial	39.4	39.4	1	0.004	0.95	KX381870.1	280	....A................	300
387Select seq gb|KX381869.1|	Brachycaudus helichrysi voucher 2583N3 cytochrome oxidase subunit I (COI) gene, partial cds; mitochondrial	39.4	39.4	1	0.004	0.95	KX381869.1	280	....A................	300
388Select seq gb|KX381868.1|	Brachycaudus spiraeae voucher 2555 cytochrome oxidase subunit I (COI) gene, partial cds; mitochondrial	39.4	39.4	1	0.004	0.95	KX381868.1	280	....A................	300
389Select seq gb|KX381861.1|	Brachycaudus helichrysi voucher 2464 cytochrome oxidase subunit I (COI) gene, partial cds; mitochondrial	39.4	39.4	1	0.004	0.95	KX381861.1	280	....A................	300
390Select seq gb|KX381855.1|	Brachycaudus helichrysi voucher 2422 cytochrome oxidase subunit I (COI) gene, partial cds; mitochondrial	39.4	39.4	1	0.004	0.95	KX381855.1	280	....A................	300
391Select seq gb|KX381852.1|	Brachycaudus helichrysi voucher 2391 cytochrome oxidase subunit I (COI) gene, partial cds; mitochondrial	39.4	39.4	1	0.004	0.95	KX381852.1	280	....A................	300
392Select seq gb|KX381851.1|	Brachycaudus tragopogonis voucher 2281N1 cytochrome oxidase subunit I (COI) gene, partial cds; mitochondrial	39.4	39.4	1	0.004	0.95	KX381851.1	280	....A................	300
393Select seq gb|KX381850.1|	Brachycaudus spiraeae voucher 2240 cytochrome oxidase subunit I (COI) gene, partial cds; mitochondrial	39.4	39.4	1	0.004	0.95	KX381850.1	280	....A................	300
394Select seq gb|KX381849.1|	Brachycaudus spiraeae voucher 2226 cytochrome oxidase subunit I (COI) gene, partial cds; mitochondrial	39.4	39.4	1	0.004	0.95	KX381849.1	280	....A................	300
395Select seq gb|KX381845.1|	Brachycaudus helichrysi voucher 2170 cytochrome oxidase subunit I (COI) gene, partial cds; mitochondrial	39.4	39.4	1	0.004	0.95	KX381845.1	280	....A................	300
396Select seq gb|KX381844.1|	Brachycaudus spiraeae voucher 2143 cytochrome oxidase subunit I (COI) gene, partial cds; mitochondrial	39.4	39.4	1	0.004	0.95	KX381844.1	280	....A................	300
397Select seq gb|KX381843.1|	Brachycaudus helichrysi voucher 2142 cytochrome oxidase subunit I (COI) gene, partial cds; mitochondrial	39.4	39.4	1	0.004	0.95	KX381843.1	280	....A................	300
398Select seq gb|KX381841.1|	Brachycaudus helichrysi voucher 1987 cytochrome oxidase subunit I (COI) gene, partial cds; mitochondrial	39.4	39.4	1	0.004	0.95	KX381841.1	280	....A................	300
399Select seq gb|KX381840.1|	Brachycaudus helichrysi voucher 1946 cytochrome oxidase subunit I (COI) gene, partial cds; mitochondrial	39.4	39.4	1	0.004	0.95	KX381840.1	280	....A................	300
400Select seq gb|KX381838.1|	Brachycaudus helichrysi voucher 1937 cytochrome oxidase subunit I (COI) gene, partial cds; mitochondrial	39.4	39.4	1	0.004	0.95	KX381838.1	276	....A................	296
401Select seq gb|KX381835.1|	Brachycaudus helichrysi voucher 1828 cytochrome oxidase subunit I (COI) gene, partial cds; mitochondrial	39.4	39.4	1	0.004	0.95	KX381835.1	280	....A................	300
402Select seq gb|KX381833.1|	Brachycaudus helichrysi voucher 1805 cytochrome oxidase subunit I (COI) gene, partial cds; mitochondrial	39.4	39.4	1	0.004	0.95	KX381833.1	280	....A................	300
403Select seq gb|KX381832.1|	Brachycaudus spiraeae voucher 1775 cytochrome oxidase subunit I (COI) gene, partial cds; mitochondrial	39.4	39.4	1	0.004	0.95	KX381832.1	280	....A................	300
404Select seq gb|KX381831.1|	Brachycaudus helichrysi voucher 1749 cytochrome oxidase subunit I (COI) gene, partial cds; mitochondrial	39.4	39.4	1	0.004	0.95	KX381831.1	280	....A................	300
405Select seq gb|KX381827.1|	Brachycaudus helichrysi voucher 1149 cytochrome oxidase subunit I (COI) gene, partial cds; mitochondrial	39.4	39.4	1	0.004	0.95	KX381827.1	280	....A................	300
406Select seq gb|KT877996.1|	Brevicoryne brassicae cytochrome oxidase subunit I (COI) gene, partial cds; mitochondrial	39.4	39.4	1	0.004	0.95	KT877996.1	290	....A................	310
407Select seq gb|JN989543.1|	Stenopirates sp. NKU01 mitochondrion, complete genome	39.4	39.4	1	0.004	0.95	JN989543.1	13529	..A................ 13	13549
408Select seq gb|KU530570.1|	Hybothoracaphis laevigata voucher NZMC_aphid 25731 cytochrome oxidase subunit I (COI) gene, partial cds; mitochondrial	39.4	39.4	1	0.004	0.95	KU530570.1	313	....A................	333
409Select seq gb|KT382718.1|	Metcalfa pruinosa voucher 14-WV-12 cytochrome oxidase subunit I (COI) gene, partial cds; mitochondrial	39.4	39.4	1	0.004	0.95	KT382718.1	168	....T................	188
410Select seq gb|KT382716.1|	Metcalfa pruinosa voucher 14-WV-10 cytochrome oxidase subunit I (COI) gene, partial cds; mitochondrial	39.4	39.4	1	0.004	0.95	KT382716.1	168	....T................	188
411Select seq gb|KT382715.1|	Metcalfa pruinosa voucher 14-WV-09 cytochrome oxidase subunit I (COI) gene, partial cds; mitochondrial	39.4	39.4	1	0.004	0.95	KT382715.1	168	....T................	188
412Select seq gb|KT382709.1|	Metcalfa pruinosa voucher 14-WV-03 cytochrome oxidase subunit I (COI) gene, partial cds; mitochondrial	39.4	39.4	1	0.004	0.95	KT382709.1	168	....T................	188
413Select seq gb|KT382708.1|	Metcalfa pruinosa voucher 14-WV-02 cytochrome oxidase subunit I (COI) gene, partial cds; mitochondrial	39.4	39.4	1	0.004	0.95	KT382708.1	168	....T................	188
414Select seq gb|KX447142.1|	Aphis craccivora isolate New_world mitochondrion, complete genome	39.4	39.4	1	0.004	0.95	KX447142.1	381	....A................	401
415Select seq gb|KX447141.1|	Aphis craccivora isolate Old_world mitochondrion, complete genome	39.4	39.4	1	0.004	0.95	KX447141.1	381	....A................	401
416Select seq gb|KR576426.1|	Illinoia sp. BOLD-2016 voucher BIOUG07501-H06 cytochrome oxidase subunit 1 (COI) gene, partial cds; mitochondrial	39.4	39.4	1	0.004	0.95	KR576426.1	313	....A................	333
417Select seq gb|KR576399.1|	Macrosiphum sp. BOLD-2016 voucher BIOUG05821-F08 cytochrome oxidase subunit 1 (COI) gene, partial cds; mitochondrial	39.4	39.4	1	0.004	0.95	KR576399.1	305	....A................	325
418Select seq gb|KR576393.1|	Macrosiphoniella millefolii voucher BIOUG14661-C06 cytochrome oxidase subunit 1 (COI) gene, partial cds; mitochondrial	39.4	39.4	1	0.004	0.95	KR576393.1	303	....A................	323
419Select seq gb|KR576387.1|	Uroleucon sp. BOLD-2016 voucher BIOUG09177-B12 cytochrome oxidase subunit 1 (COI) gene, partial cds; mitochondrial	39.4	39.4	1	0.004	0.95	KR576387.1	283	....A................	303
420Select seq gb|KR576344.1|	Uroleucon sp. BOLD-2016 voucher BIOUG05821-H07 cytochrome oxidase subunit 1 (COI) gene, partial cds; mitochondrial	39.4	39.4	1	0.004	0.95	KR576344.1	305	....A................	325
421Select seq gb|KR576321.1|	Cavariella konoi voucher BIOUG06311-E03 cytochrome oxidase subunit 1 (COI) gene, partial cds; mitochondrial	39.4	39.4	1	0.004	0.95	KR576321.1	305	....A................	325
422Select seq gb|KR576311.1|	Macrosiphum sp. BOLD-2016 voucher BIOUG16130-B08 cytochrome oxidase subunit 1 (COI) gene, partial cds; mitochondrial	39.4	39.4	1	0.004	0.95	KR576311.1	303	....A................	323
423Select seq gb|KR576294.1|	Aphis sp. BOLD-2016 voucher BIOUG07935-A06 cytochrome oxidase subunit 1 (COI) gene, partial cds; mitochondrial	39.4	39.4	1	0.004	0.95	KR576294.1	312	....A................	332
424Select seq gb|KR576290.1|	Aphidinae sp. BOLD-2016 voucher BIOUG09367-D11 cytochrome oxidase subunit 1 (COI) gene, partial cds; mitochondrial	39.4	39.4	1	0.004	0.95	KR576290.1	305	....A................	325
425Select seq gb|KR576254.1|	Aphidinae sp. BOLD-2016 voucher BIOUG14005-C05 cytochrome oxidase subunit 1 (COI) gene, partial cds; mitochondrial	39.4	39.4	1	0.004	0.95	KR576254.1	292	....A................	312
426Select seq gb|KR576248.1|	Macrosiphum sp. BOLD-2016 voucher 10BBCHEM-0970 cytochrome oxidase subunit 1 (COI) gene, partial cds; mitochondrial	39.4	39.4	1	0.004	0.95	KR576248.1	313	....A................	333
427Select seq gb|KR576235.1|	Nearctaphis bakeri voucher BIOUG16129-A01 cytochrome oxidase subunit 1 (COI) gene, partial cds; mitochondrial	39.4	39.4	1	0.004	0.95	KR576235.1	312	....A................	332
428Select seq gb|KR576234.1|	Metcalfa pruinosa voucher BIOUG08598-D07 cytochrome oxidase subunit 1 (COI) gene, partial cds; mitochondrial	39.4	39.4	1	0.004	0.95	KR576234.1	313	....T................	333
429Select seq gb|KR576195.1|	Uroleucon sp. BOLD-2016 voucher BIOUG09174-F09 cytochrome oxidase subunit 1 (COI) gene, partial cds; mitochondrial	39.4	39.4	1	0.004	0.95	KR576195.1	303	....A................	323
430Select seq gb|KR576159.1|	Saltusaphidinae sp. BOLD-2016 voucher BIOUG06859-C06 cytochrome oxidase subunit 1 (COI) gene, partial cds; mitochondrial	39.4	39.4	1	0.004	0.95	KR576159.1	303	....A................	323
431Select seq gb|KR576138.1|	Metcalfa pruinosa voucher BIOUG02749-C04 cytochrome oxidase subunit 1 (COI) gene, partial cds; mitochondrial	39.4	39.4	1	0.004	0.95	KR576138.1	67	....T................	87
432Select seq gb|KR576118.1|	Nearctaphis sp. BOLD-2016 voucher BIOUG03633-F05 cytochrome oxidase subunit 1 (COI) gene, partial cds; mitochondrial	39.4	39.4	1	0.004	0.95	KR576118.1	313	....A................	333
433Select seq gb|KR576117.1|	Calaphidinae sp. BOLD-2016 voucher BIOUG04197-G03 cytochrome oxidase subunit 1 (COI) gene, partial cds; mitochondrial	39.4	39.4	1	0.004	0.95	KR576117.1	313	....A................	333
434Select seq gb|KR576108.1|	Rhopalomyzus lonicerae voucher BIOUG13985-G11 cytochrome oxidase subunit 1 (COI) gene, partial cds; mitochondrial	39.4	39.4	1	0.004	0.95	KR576108.1	303	....A................	323
435Select seq gb|KR576093.1|	Utamphorophora humboldti voucher BIOUG16016-E01 cytochrome oxidase subunit 1 (COI) gene, partial cds; mitochondrial	39.4	39.4	1	0.004	0.95	KR576093.1	313	....A................	333
436Select seq gb|KR576076.1|	Illinoia azaleae voucher BIOUG13563-B05 cytochrome oxidase subunit 1 (COI) gene, partial cds; mitochondrial	39.4	39.4	1	0.004	0.95	KR576076.1	303	....A................	323
437Select seq gb|KR576066.1|	Utamphorophora humboldti voucher BIOUG16016-A03 cytochrome oxidase subunit 1 (COI) gene, partial cds; mitochondrial	39.4	39.4	1	0.004	0.95	KR576066.1	303	....A................	323
438Select seq gb|KR576064.1|	Callipterinella sp. BOLD-2016 voucher BIOUG16129-C10 cytochrome oxidase subunit 1 (COI) gene, partial cds; mitochondrial	39.4	39.4	1	0.004	0.95	KR576064.1	313	....A................	333
439Select seq gb|KR576050.1|	Nearctaphis bakeri voucher BIOUG16130-C07 cytochrome oxidase subunit 1 (COI) gene, partial cds; mitochondrial	39.4	39.4	1	0.004	0.95	KR576050.1	300	....A................	320
440Select seq gb|KR576024.1|	Metopolophium dirhodum voucher BIOUG16162-H05 cytochrome oxidase subunit 1 (COI) gene, partial cds; mitochondrial	39.4	39.4	1	0.004	0.95	KR576024.1	312	....A................	332
441Select seq gb|KR575997.1|	Calaphidinae sp. BOLD-2016 voucher BIOUG03696-H07 cytochrome oxidase subunit 1 (COI) gene, partial cds; mitochondrial	39.4	39.4	1	0.004	0.95	KR575997.1	313	....A................	333
442Select seq gb|KR575887.1|	Macrosiphum sp. BOLD-2016 voucher BIOUG09180-G07 cytochrome oxidase subunit 1 (COI) gene, partial cds; mitochondrial	39.4	39.4	1	0.004	0.95	KR575887.1	305	....A................	325
443Select seq gb|KR575864.1|	Macrosiphum sp. BOLD-2016 voucher BIOUG06641-A05 cytochrome oxidase subunit 1 (COI) gene, partial cds; mitochondrial	39.4	39.4	1	0.004	0.95	KR575864.1	300	....A................	320
444Select seq gb|KR575850.1|	Aphis glycines voucher BIOUG16071-E12 cytochrome oxidase subunit 1 (COI) gene, partial cds; mitochondrial	39.4	39.4	1	0.004	0.95	KR575850.1	313	....A................	333
445Select seq gb|KR575833.1|	Schizaphis sp. BOLD-2016 voucher BIOUG06234-D11 cytochrome oxidase subunit 1 (COI) gene, partial cds; mitochondrial	39.4	39.4	1	0.004	0.95	KR575833.1	313	....A................	333
446Select seq gb|KR575812.1|	Calaphidinae sp. BOLD-2016 voucher BIOUG03852-H01 cytochrome oxidase subunit 1 (COI) gene, partial cds; mitochondrial	39.4	39.4	1	0.004	0.95	KR575812.1	313	....A................	333
447Select seq gb|KR575793.1|	Macrosiphum sp. BOLD-2016 voucher BIOUG05405-G05 cytochrome oxidase subunit 1 (COI) gene, partial cds; mitochondrial	39.4	39.4	1	0.004	0.95	KR575793.1	303	....A................	323
448Select seq gb|KR575747.1|	Calaphidinae sp. BOLD-2016 voucher BIOUG03852-G12 cytochrome oxidase subunit 1 (COI) gene, partial cds; mitochondrial	39.4	39.4	1	0.004	0.95	KR575747.1	313	....A................	333
449Select seq gb|KR575699.1|	Calaphidinae sp. BOLD-2016 voucher BIOUG04225-D11 cytochrome oxidase subunit 1 (COI) gene, partial cds; mitochondrial	39.4	39.4	1	0.004	0.95	KR575699.1	313	....A................	333
450Select seq gb|KR575694.1|	Aphis glycines voucher BIOUG16028-A03 cytochrome oxidase subunit 1 (COI) gene, partial cds; mitochondrial	39.4	39.4	1	0.004	0.95	KR575694.1	303	....A................	323
451Select seq gb|KR575673.1|	Rhopalosiphum rufiabdominalis voucher BIOUG16021-D08 cytochrome oxidase subunit 1 (COI) gene, partial cds; mitochondrial	39.4	39.4	1	0.004	0.95	KR575673.1	312	....A................	332
452Select seq gb|KR575669.1|	Anoecia sp. BOLD-2016 voucher BIOUG16008-C09 cytochrome oxidase subunit 1 (COI) gene, partial cds; mitochondrial	39.4	39.4	1	0.004	0.95	KR575669.1	313	....A................	333
453Select seq gb|KR575637.1|	Tetraneura ulmi voucher BIOUG09137-F12 cytochrome oxidase subunit 1 (COI) gene, partial cds; mitochondrial	39.4	39.4	1	0.004	0.95	KR575637.1	305	....A................	325
454Select seq gb|KR575632.1|	Uroleucon sp. BOLD-2016 voucher BIOUG07312-B02 cytochrome oxidase subunit 1 (COI) gene, partial cds; mitochondrial	39.4	39.4	1	0.004	0.95	KR575632.1	305	....A................	325
455Select seq gb|KR575606.1|	Illinoia sp. BOLD-2016 voucher BIOUG07601-B04 cytochrome oxidase subunit 1 (COI) gene, partial cds; mitochondrial	39.4	39.4	1	0.004	0.95	KR575606.1	313	....A................	333
456Select seq gb|KR575588.1|	Calaphidinae sp. BOLD-2016 voucher BIOUG04196-D11 cytochrome oxidase subunit 1 (COI) gene, partial cds; mitochondrial	39.4	39.4	1	0.004	0.95	KR575588.1	313	....A................	333
457Select seq gb|KR575582.1|	Macrosiphum sp. BOLD-2016 voucher BIOUG09179-D12 cytochrome oxidase subunit 1 (COI) gene, partial cds; mitochondrial	39.4	39.4	1	0.004	0.95	KR575582.1	286	....A................	306
458Select seq gb|KR575422.1|	Drepanaphis acerifoliae voucher BIOUG08371-F09 cytochrome oxidase subunit 1 (COI) gene, partial cds; mitochondrial	39.4	39.4	1	0.004	0.95	KR575422.1	312	....A................	332
459Select seq gb|KR575358.1|	Metopolophium sp. BOLD-2016 voucher 10BBCHEM-0532 cytochrome oxidase subunit 1 (COI) gene, partial cds; mitochondrial	39.4	39.4	1	0.004	0.95	KR575358.1	313	....A................	333
460Select seq gb|KR575354.1|	Thripsaphis cyperi voucher CHU06-APH-097 cytochrome oxidase subunit 1 (COI) gene, partial cds; mitochondrial	39.4	39.4	1	0.004	0.95	KR575354.1	297	....A................	317
461Select seq gb|KR575344.1|	Aphis sp. BOLD-2016 voucher BIOUG06929-E11 cytochrome oxidase subunit 1 (COI) gene, partial cds; mitochondrial	39.4	39.4	1	0.004	0.95	KR575344.1	305	....A................	325
462Select seq gb|KR575297.1|	Calaphidinae sp. BOLD-2016 voucher BIOUG08438-A10 cytochrome oxidase subunit 1 (COI) gene, partial cds; mitochondrial	39.4	39.4	1	0.004	0.95	KR575297.1	312	....A................	332
463Select seq gb|KR575276.1|	Uroleucon sp. BOLD-2016 voucher BIOUG09180-E01 cytochrome oxidase subunit 1 (COI) gene, partial cds; mitochondrial	39.4	39.4	1	0.004	0.95	KR575276.1	309	....A................	329
464Select seq gb|KR575262.1|	Macrosiphum sp. BOLD-2016 voucher BIOUG06314-G10 cytochrome oxidase subunit 1 (COI) gene, partial cds; mitochondrial	39.4	39.4	1	0.004	0.95	KR575262.1	304	....A................	324
465Select seq gb|KR575233.1|	Takecallis arundicolens voucher BIOUG16050-E09 cytochrome oxidase subunit 1 (COI) gene, partial cds; mitochondrial	39.4	39.4	1	0.004	0.95	KR575233.1	312	....A................	332
466Select seq gb|KR575230.1|	Acyrthosiphon pisum voucher BIOUG03140-H02 cytochrome oxidase subunit 1 (COI) gene, partial cds; mitochondrial	39.4	39.4	1	0.004	0.95	KR575230.1	313	....A................	333
467Select seq gb|KR575198.1|	Aphis craccivora voucher BIOUG13346-H11 cytochrome oxidase subunit 1 (COI) gene, partial cds; mitochondrial	39.4	39.4	1	0.004	0.95	KR575198.1	309	....A................	329
468Select seq gb|KR575190.1|	Aphis pentstemonicola voucher BIOUG06939-E10 cytochrome oxidase subunit 1 (COI) gene, partial cds; mitochondrial	39.4	39.4	1	0.004	0.95	KR575190.1	313	....A................	333
469Select seq gb|KR575179.1|	Saltusaphidinae sp. BOLD-2016 voucher BIOUG06659-B09 cytochrome oxidase subunit 1 (COI) gene, partial cds; mitochondrial	39.4	39.4	1	0.004	0.95	KR575179.1	303	....A................	323
470Select seq gb|KR575138.1|	Myzus persicae voucher BIOUG16018-H01 cytochrome oxidase subunit 1 (COI) gene, partial cds; mitochondrial	39.4	39.4	1	0.004	0.95	KR575138.1	303	....A................	323
471Select seq gb|KR575115.1|	Illinoia azaleae voucher BIOUG13563-A01 cytochrome oxidase subunit 1 (COI) gene, partial cds; mitochondrial	39.4	39.4	1	0.004	0.95	KR575115.1	303	....A................	323
472Select seq gb|KR575095.1|	Illinoia sp. BOLD-2016 voucher BIOUG09623-F08 cytochrome oxidase subunit 1 (COI) gene, partial cds; mitochondrial	39.4	39.4	1	0.004	0.95	KR575095.1	309	....A................	329
473Select seq gb|KR575094.1|	Macrosiphum sp. BOLD-2016 voucher BIOUG08884-D05 cytochrome oxidase subunit 1 (COI) gene, partial cds; mitochondrial	39.4	39.4	1	0.004	0.95	KR575094.1	305	....A................	325
474Select seq gb|KR575068.1|	Cinara mariana voucher BIOUG07158-E02 cytochrome oxidase subunit 1 (COI) gene, partial cds; mitochondrial	39.4	39.4	1	0.004	0.95	KR575068.1	313	....A................	333
475Select seq gb|KR575064.1|	Chaitophorus pusillus voucher BIOUG14661-C01 cytochrome oxidase subunit 1 (COI) gene, partial cds; mitochondrial	39.4	39.4	1	0.004	0.95	KR575064.1	303	....A................	323
476Select seq gb|KR574989.1|	Cavariella konoi voucher BIOUG05961-C07 cytochrome oxidase subunit 1 (COI) gene, partial cds; mitochondrial	39.4	39.4	1	0.004	0.95	KR574989.1	313	....A................	333
477Select seq gb|KR574983.1|	Uroleucon sp. BOLD-2016 voucher BIOUG08040-B03 cytochrome oxidase subunit 1 (COI) gene, partial cds; mitochondrial	39.4	39.4	1	0.004	0.95	KR574983.1	313	....A................	333
478Select seq gb|KR574967.1|	Macrosiphum sp. BOLD-2016 voucher BIOUG07601-B11 cytochrome oxidase subunit 1 (COI) gene, partial cds; mitochondrial	39.4	39.4	1	0.004	0.95	KR574967.1	313	....A................	333
479Select seq gb|KR574931.1|	Uroleucon sp. BOLD-2016 voucher BIOUG09177-H03 cytochrome oxidase subunit 1 (COI) gene, partial cds; mitochondrial	39.4	39.4	1	0.004	0.95	KR574931.1	313	....A................	333
480Select seq gb|KR574911.1|	Schizaphis sp. BOLD-2016 voucher BIOUG06240-A02 cytochrome oxidase subunit 1 (COI) gene, partial cds; mitochondrial	39.4	39.4	1	0.004	0.95	KR574911.1	302	....A................	322
481Select seq gb|KR574880.1|	Macrosiphum sp. BOLD-2016 voucher BIOUG06252-C08 cytochrome oxidase subunit 1 (COI) gene, partial cds; mitochondrial	39.4	39.4	1	0.004	0.95	KR574880.1	313	....A................	333
482Select seq gb|KR574862.1|	Aphis craccivora voucher BIOUG10616-G09 cytochrome oxidase subunit 1 (COI) gene, partial cds; mitochondrial	39.4	39.4	1	0.004	0.95	KR574862.1	313	....A................	333
483Select seq gb|KR574814.1|	Macrosiphum sp. BOLD-2016 voucher BIOUG16008-C04 cytochrome oxidase subunit 1 (COI) gene, partial cds; mitochondrial	39.4	39.4	1	0.004	0.95	KR574814.1	252	....A................	272
484Select seq gb|KR574808.1|	Macrosiphum sp. BOLD-2016 voucher BIOUG09179-B10 cytochrome oxidase subunit 1 (COI) gene, partial cds; mitochondrial	39.4	39.4	1	0.004	0.95	KR574808.1	305	....A................	325
485Select seq gb|KR574806.1|	Uroleucon taraxaci voucher BIOUG16158-F06 cytochrome oxidase subunit 1 (COI) gene, partial cds; mitochondrial	39.4	39.4	1	0.004	0.95	KR574806.1	312	....A................	332
486Select seq gb|KR574776.1|	Macrosiphum sp. BOLD-2016 voucher BIOUG08862-B08 cytochrome oxidase subunit 1 (COI) gene, partial cds; mitochondrial	39.4	39.4	1	0.004	0.95	KR574776.1	305	....A................	325
487Select seq gb|KR574773.1|	Uroleucon sp. BOLD-2016 voucher BIOUG09177-G12 cytochrome oxidase subunit 1 (COI) gene, partial cds; mitochondrial	39.4	39.4	1	0.004	0.95	KR574773.1	313	....A................	333
488Select seq gb|KR574747.1|	Calaphidinae sp. BOLD-2016 voucher BIOUG04097-B05 cytochrome oxidase subunit 1 (COI) gene, partial cds; mitochondrial	39.4	39.4	1	0.004	0.95	KR574747.1	313	....A................	333
489Select seq gb|KR574746.1|	Macrosiphum sp. BOLD-2016 voucher BIOUG09176-E11 cytochrome oxidase subunit 1 (COI) gene, partial cds; mitochondrial	39.4	39.4	1	0.004	0.95	KR574746.1	313	....A................	333
490Select seq gb|KR574730.1|	Macrosiphum sp. BOLD-2016 voucher BIOUG09236-B08 cytochrome oxidase subunit 1 (COI) gene, partial cds; mitochondrial	39.4	39.4	1	0.004	0.95	KR574730.1	313	....A................	333
491Select seq gb|KR574674.1|	Schizolachnus obscurus voucher BIOUG16134-H10 cytochrome oxidase subunit 1 (COI) gene, partial cds; mitochondrial	39.4	39.4	1	0.004	0.95	KR574674.1	313	....A................	333
492Select seq gb|KR574667.1|	Calaphis betulaecolens voucher BIOUG08438-B03 cytochrome oxidase subunit 1 (COI) gene, partial cds; mitochondrial	39.4	39.4	1	0.004	0.95	KR574667.1	312	....A................	332
493Select seq gb|KR574628.1|	Calaphidinae sp. BOLD-2016 voucher BIOUG04097-G07 cytochrome oxidase subunit 1 (COI) gene, partial cds; mitochondrial	39.4	39.4	1	0.004	0.95	KR574628.1	313	....A................	333
494Select seq gb|KR574614.1|	Aphis oenotherae voucher BIOUG06688-F08 cytochrome oxidase subunit 1 (COI) gene, partial cds; mitochondrial	39.4	39.4	1	0.004	0.95	KR574614.1	305	....A................	325
495Select seq gb|KR574604.1|	Amphorophora ampullata voucher BIOUG06525-E10 cytochrome oxidase subunit 1 (COI) gene, partial cds; mitochondrial	39.4	39.4	1	0.004	0.95	KR574604.1	288	....A................	308
496Select seq gb|KR574556.1|	Macrosiphum sp. BOLD-2016 voucher BIOUG08284-G02 cytochrome oxidase subunit 1 (COI) gene, partial cds; mitochondrial	39.4	39.4	1	0.004	0.95	KR574556.1	303	....A................	323
497Select seq gb|KR574552.1|	Illinoia azaleae voucher BIOUG13563-A04 cytochrome oxidase subunit 1 (COI) gene, partial cds; mitochondrial	39.4	39.4	1	0.004	0.95	KR574552.1	303	....A................	323
498Select seq gb|KR574523.1|	Aphidinae sp. BOLD-2016 voucher BIOUG16087-B06 cytochrome oxidase subunit 1 (COI) gene, partial cds; mitochondrial	39.4	39.4	1	0.004	0.95	KR574523.1	276	....A................	296
499Select seq gb|KR574517.1|	Aphidinae sp. BOLD-2016 voucher 10BBCHEM-0808 cytochrome oxidase subunit 1 (COI) gene, partial cds; mitochondrial	39.4	39.4	1	0.004	0.95	KR574517.1	258	....A................	278
500Select seq gb|KR574516.1|	Aphis varians voucher BIOUG06391-F03 cytochrome oxidase subunit 1 (COI) gene, partial cds; mitochondrial	39.4	39.4	1	0.004	0.95	KR574516.1	304	....A................	324
501Select seq gb|KR574491.1|	Illinoia sp. BOLD-2016 voucher BIOUG09175-F01 cytochrome oxidase subunit 1 (COI) gene, partial cds; mitochondrial	39.4	39.4	1	0.004	0.95	KR574491.1	305	....A................	325
502Select seq gb|KR574484.1|	Nearctaphis crataegifoliae voucher BIOUG16058-D08 cytochrome oxidase subunit 1 (COI) gene, partial cds; mitochondrial	39.4	39.4	1	0.004	0.95	KR574484.1	303	....A................	323
503Select seq gb|KR574458.1|	Aphis spiraecola voucher BIOUG08805-C11 cytochrome oxidase subunit 1 (COI) gene, partial cds; mitochondrial	39.4	39.4	1	0.004	0.95	KR574458.1	293	....A................	313
504Select seq gb|KR574450.1|	Calaphidinae sp. BOLD-2016 voucher BIOUG03696-A02 cytochrome oxidase subunit 1 (COI) gene, partial cds; mitochondrial	39.4	39.4	1	0.004	0.95	KR574450.1	313	....A................	333
505Select seq gb|KR574437.1|	Aphis craccivora voucher BIOUG10473-E04 cytochrome oxidase subunit 1 (COI) gene, partial cds; mitochondrial	39.4	39.4	1	0.004	0.95	KR574437.1	313	....A................	333
506Select seq gb|KR574427.1|	Macrosiphum sp. BOLD-2016 voucher BIOUG04445-A04 cytochrome oxidase subunit 1 (COI) gene, partial cds; mitochondrial	39.4	39.4	1	0.004	0.95	KR574427.1	312	....A................	332
507Select seq gb|KR574378.1|	Macrosiphum sp. BOLD-2016 voucher BIOUG05100-A02 cytochrome oxidase subunit 1 (COI) gene, partial cds; mitochondrial	39.4	39.4	1	0.004	0.95	KR574378.1	312	....A................	332
508Select seq gb|KR574362.1|	Macrosiphum sp. BOLD-2016 voucher BIOUG09174-F08 cytochrome oxidase subunit 1 (COI) gene, partial cds; mitochondrial	39.4	39.4	1	0.004	0.95	KR574362.1	305	....A................	325
509Select seq gb|KR574329.1|	Tetraneura ulmi voucher BIOUG16094-H02 cytochrome oxidase subunit 1 (COI) gene, partial cds; mitochondrial	39.4	39.4	1	0.004	0.95	KR574329.1	312	....A................	332
510Select seq gb|KR574319.1|	Tetraneura ulmi voucher BIOUG13985-B03 cytochrome oxidase subunit 1 (COI) gene, partial cds; mitochondrial	39.4	39.4	1	0.004	0.95	KR574319.1	303	....A................	323
511Select seq gb|KR574308.1|	Macrosiphum sp. BOLD-2016 voucher BIOUG08284-G04 cytochrome oxidase subunit 1 (COI) gene, partial cds; mitochondrial	39.4	39.4	1	0.004	0.95	KR574308.1	303	....A................	323
512Select seq gb|KR574271.1|	Illinoia azaleae voucher BIOUG13141-H09 cytochrome oxidase subunit 1 (COI) gene, partial cds; mitochondrial	39.4	39.4	1	0.004	0.95	KR574271.1	313	....A................	333
513Select seq gb|KR574256.1|	Aphidinae sp. BOLD-2016 voucher BIOUG03938-D09 cytochrome oxidase subunit 1 (COI) gene, partial cds; mitochondrial	39.4	39.4	1	0.004	0.95	KR574256.1	313	....A................	333
514Select seq gb|KR574248.1|	Macrosiphum sp. BOLD-2016 voucher BIOUG06311-B12 cytochrome oxidase subunit 1 (COI) gene, partial cds; mitochondrial	39.4	39.4	1	0.004	0.95	KR574248.1	313	....A................	333
515Select seq gb|KR574218.1|	Aphidinae sp. BOLD-2016 voucher BIOUG09367-D08 cytochrome oxidase subunit 1 (COI) gene, partial cds; mitochondrial	39.4	39.4	1	0.004	0.95	KR574218.1	311	....A................	331
516Select seq gb|KR574195.1|	Nearctaphis bakeri voucher BIOUG13349-H06 cytochrome oxidase subunit 1 (COI) gene, partial cds; mitochondrial	39.4	39.4	1	0.004	0.95	KR574195.1	312	....A................	332
517Select seq gb|KR574191.1|	Macrosiphum sp. BOLD-2016 voucher BIOUG05091-F01 cytochrome oxidase subunit 1 (COI) gene, partial cds; mitochondrial	39.4	39.4	1	0.004	0.95	KR574191.1	303	....A................	323
518Select seq gb|KR574170.1|	Aphidinae sp. BOLD-2016 voucher BIOUG01308-F09 cytochrome oxidase subunit 1 (COI) gene, partial cds; mitochondrial	39.4	39.4	1	0.004	0.95	KR574170.1	313	....A................	333
519Select seq gb|KR574163.1|	Uroleucon breviscriptum voucher BIOUG07962-F08 cytochrome oxidase subunit 1 (COI) gene, partial cds; mitochondrial	39.4	39.4	1	0.004	0.95	KR574163.1	303	....A................	323
520Select seq gb|KR574132.1|	Macrosiphum sp. BOLD-2016 voucher BIOUG06245-G08 cytochrome oxidase subunit 1 (COI) gene, partial cds; mitochondrial	39.4	39.4	1	0.004	0.95	KR574132.1	305	....A................	325
521Select seq gb|KR574121.1|	Rhopalomyzus lonicerae voucher BIOUG16138-E12 cytochrome oxidase subunit 1 (COI) gene, partial cds; mitochondrial	39.4	39.4	1	0.004	0.95	KR574121.1	312	....A................	332
522Select seq gb|KR574119.1|	Calaphidinae sp. BOLD-2016 voucher BIOUG04196-F02 cytochrome oxidase subunit 1 (COI) gene, partial cds; mitochondrial	39.4	39.4	1	0.004	0.95	KR574119.1	313	....A................	333
523Select seq gb|KR574114.1|	Illinoia sp. BOLD-2016 voucher BIOUG08403-C05 cytochrome oxidase subunit 1 (COI) gene, partial cds; mitochondrial	39.4	39.4	1	0.004	0.95	KR574114.1	313	....A................	333
524Select seq gb|KR574107.1|	Metopolophium dirhodum voucher BIOUG16161-B11 cytochrome oxidase subunit 1 (COI) gene, partial cds; mitochondrial	39.4	39.4	1	0.004	0.95	KR574107.1	312	....A................	332
525Select seq gb|KR574099.1|	Metcalfa pruinosa voucher BIOUG08311-H06 cytochrome oxidase subunit 1 (COI) gene, partial cds; mitochondrial	39.4	39.4	1	0.004	0.95	KR574099.1	235	....T................	255
526Select seq gb|KR574090.1|	Macrosiphum sp. BOLD-2016 voucher BIOUG09237-E11 cytochrome oxidase subunit 1 (COI) gene, partial cds; mitochondrial	39.4	39.4	1	0.004	0.95	KR574090.1	313	....A................	333
527Select seq gb|KR574076.1|	Calaphidinae sp. BOLD-2016 voucher BIOUG04225-C09 cytochrome oxidase subunit 1 (COI) gene, partial cds; mitochondrial	39.4	39.4	1	0.004	0.95	KR574076.1	313	....A................	333
528Select seq gb|KR574070.1|	Metcalfa pruinosa voucher BIOUG08378-H04 cytochrome oxidase subunit 1 (COI) gene, partial cds; mitochondrial	39.4	39.4	1	0.004	0.95	KR574070.1	313	....T................	333
529Select seq gb|KR574058.1|	Macrosiphum sp. BOLD-2016 voucher BIOUG06358-D04 cytochrome oxidase subunit 1 (COI) gene, partial cds; mitochondrial	39.4	39.4	1	0.004	0.95	KR574058.1	305	....A................	325
530Select seq gb|KR574021.1|	Aphidinae sp. BOLD-2016 voucher BIOUG14005-A08 cytochrome oxidase subunit 1 (COI) gene, partial cds; mitochondrial	39.4	39.4	1	0.004	0.95	KR574021.1	292	....A................	312
531Select seq gb|KR574011.1|	Chaitophorus sp. BOLD-2016 voucher BIOUG13486-G07 cytochrome oxidase subunit 1 (COI) gene, partial cds; mitochondrial	39.4	39.4	1	0.004	0.95	KR574011.1	239	....A................	259
532Select seq gb|KR574009.1|	Calaphidinae sp. BOLD-2016 voucher BIOUG03852-G08 cytochrome oxidase subunit 1 (COI) gene, partial cds; mitochondrial	39.4	39.4	1	0.004	0.95	KR574009.1	313	....A................	333
533Select seq gb|KR574007.1|	Hyperomyzus lactucae voucher BIOUG16161-C11 cytochrome oxidase subunit 1 (COI) gene, partial cds; mitochondrial	39.4	39.4	1	0.004	0.95	KR574007.1	312	....A................	332
534Select seq gb|KR573991.1|	Calaphidinae sp. BOLD-2016 voucher BIOUG04097-F09 cytochrome oxidase subunit 1 (COI) gene, partial cds; mitochondrial	39.4	39.4	1	0.004	0.95	KR573991.1	313	....A................	333
535Select seq gb|KR573985.1|	Macrosiphum sp. BOLD-2016 voucher BIOUG09174-B01 cytochrome oxidase subunit 1 (COI) gene, partial cds; mitochondrial	39.4	39.4	1	0.004	0.95	KR573985.1	313	....A................	333
536Select seq gb|KR573979.1|	Uroleucon sp. BOLD-2016 voucher 10BBCHEM-1141 cytochrome oxidase subunit 1 (COI) gene, partial cds; mitochondrial	39.4	39.4	1	0.004	0.95	KR573979.1	245	....A................	265
537Select seq gb|KR573954.1|	Macrosiphum sp. BOLD-2016 voucher BIOUG07932-H07 cytochrome oxidase subunit 1 (COI) gene, partial cds; mitochondrial	39.4	39.4	1	0.004	0.95	KR573954.1	303	....A................	323
538Select seq gb|KR573951.1|	Macrosiphum sp. BOLD-2016 voucher BIOUG08642-G08 cytochrome oxidase subunit 1 (COI) gene, partial cds; mitochondrial	39.4	39.4	1	0.004	0.95	KR573951.1	313	....A................	333
539Select seq gb|KR573911.1|	Illinoia sp. BOLD-2016 voucher BIOUG07201-B12 cytochrome oxidase subunit 1 (COI) gene, partial cds; mitochondrial	39.4	39.4	1	0.004	0.95	KR573911.1	313	....A................	333
540Select seq gb|KR573907.1|	Saltusaphidinae sp. BOLD-2016 voucher BIOUG07501-B12 cytochrome oxidase subunit 1 (COI) gene, partial cds; mitochondrial	39.4	39.4	1	0.004	0.95	KR573907.1	313	....A................	333
541Select seq gb|KR573905.1|	Macrosiphum sp. BOLD-2016 voucher BIOUG05090-E04 cytochrome oxidase subunit 1 (COI) gene, partial cds; mitochondrial	39.4	39.4	1	0.004	0.95	KR573905.1	303	....A................	323
542Select seq gb|KR573854.1|	Calaphidinae sp. BOLD-2016 voucher BIOUG04197-F11 cytochrome oxidase subunit 1 (COI) gene, partial cds; mitochondrial	39.4	39.4	1	0.004	0.95	KR573854.1	313	....A................	333
543Select seq gb|KR573814.1|	Cavariella konoi voucher BIOUG05961-E04 cytochrome oxidase subunit 1 (COI) gene, partial cds; mitochondrial	39.4	39.4	1	0.004	0.95	KR573814.1	313	....A................	333
544Select seq gb|KR573806.1|	Calaphidinae sp. BOLD-2016 voucher BIOUG04196-G05 cytochrome oxidase subunit 1 (COI) gene, partial cds; mitochondrial	39.4	39.4	1	0.004	0.95	KR573806.1	313	....A................	333
545Select seq gb|KR573778.1|	Diuraphis sp. BOLD-2016 voucher BIOUG08503-A08 cytochrome oxidase subunit 1 (COI) gene, partial cds; mitochondrial	39.4	39.4	1	0.004	0.95	KR573778.1	304	....A................	324
546Select seq gb|KR573774.1|	Aphidinae sp. BOLD-2016 voucher BIOUG04874-D10 cytochrome oxidase subunit 1 (COI) gene, partial cds; mitochondrial	39.4	39.4	1	0.004	0.95	KR573774.1	313	....A................	333
547Select seq gb|KR573772.1|	Mindarus obliquus voucher BIOUG17682-G01 cytochrome oxidase subunit 1 (COI) gene, partial cds; mitochondrial	39.4	39.4	1	0.004	0.95	KR573772.1	303	....A................	323
548Select seq gb|KR573714.1|	Saltusaphidinae sp. BOLD-2016 voucher BIOUG06859-C03 cytochrome oxidase subunit 1 (COI) gene, partial cds; mitochondrial	39.4	39.4	1	0.004	0.95	KR573714.1	303	....A................	323
549Select seq gb|KR573713.1|	Hyperomyzus picridis voucher BIOUG16008-B06 cytochrome oxidase subunit 1 (COI) gene, partial cds; mitochondrial	39.4	39.4	1	0.004	0.95	KR573713.1	313	....A................	333
550Select seq gb|KR573712.1|	Macrosiphum sp. BOLD-2016 voucher BIOUG05111-F03 cytochrome oxidase subunit 1 (COI) gene, partial cds; mitochondrial	39.4	39.4	1	0.004	0.95	KR573712.1	303	....A................	323
551Select seq gb|KR573689.1|	Metopolophium sp. BOLD-2016 voucher 10BBCHEM-1040 cytochrome oxidase subunit 1 (COI) gene, partial cds; mitochondrial	39.4	39.4	1	0.004	0.95	KR573689.1	313	....A................	333
552Select seq gb|KR573647.1|	Aphis spiraecola voucher BIOUG16066-G04 cytochrome oxidase subunit 1 (COI) gene, partial cds; mitochondrial	39.4	39.4	1	0.004	0.95	KR573647.1	309	....A................	329
553Select seq gb|KR573596.1|	Aphis varians voucher BIOUG04646-A08 cytochrome oxidase subunit 1 (COI) gene, partial cds; mitochondrial	39.4	39.4	1	0.004	0.95	KR573596.1	313	....A................	333
554Select seq gb|KR573588.1|	Hyperomyzus picridis voucher BIOUG16087-A11 cytochrome oxidase subunit 1 (COI) gene, partial cds; mitochondrial	39.4	39.4	1	0.004	0.95	KR573588.1	300	....A................	320
555Select seq gb|KR573583.1|	Uroleucon sp. BOLD-2016 voucher BIOUG05152-F10 cytochrome oxidase subunit 1 (COI) gene, partial cds; mitochondrial	39.4	39.4	1	0.004	0.95	KR573583.1	313	....A................	333
556Select seq gb|KR573566.1|	Uroleucon sp. BOLD-2016 voucher BIOUG07937-F09 cytochrome oxidase subunit 1 (COI) gene, partial cds; mitochondrial	39.4	39.4	1	0.004	0.95	KR573566.1	312	....A................	332
557Select seq gb|KR573562.1|	Calaphidinae sp. BOLD-2016 voucher BIOUG03852-E12 cytochrome oxidase subunit 1 (COI) gene, partial cds; mitochondrial	39.4	39.4	1	0.004	0.95	KR573562.1	313	....A................	333
558Select seq gb|KR573532.1|	Calaphidinae sp. BOLD-2016 voucher BIOUG04197-G04 cytochrome oxidase subunit 1 (COI) gene, partial cds; mitochondrial	39.4	39.4	1	0.004	0.95	KR573532.1	313	....A................	333
559Select seq gb|KR573517.1|	Uroleucon sp. BOLD-2016 voucher BIOUG06705-D01 cytochrome oxidase subunit 1 (COI) gene, partial cds; mitochondrial	39.4	39.4	1	0.004	0.95	KR573517.1	303	....A................	323
560Select seq gb|KR573507.1|	Calaphis betulaecolens voucher BIOUG10861-D11 cytochrome oxidase subunit 1 (COI) gene, partial cds; mitochondrial	39.4	39.4	1	0.004	0.95	KR573507.1	313	....A................	333
561Select seq gb|KR573495.1|	Aphis spiraecola voucher BIOUG08421-H11 cytochrome oxidase subunit 1 (COI) gene, partial cds; mitochondrial	39.4	39.4	1	0.004	0.95	KR573495.1	312	....A................	332
562Select seq gb|KR573490.1|	Nearctaphis sp. BOLD-2016 voucher BIOUG03726-E03 cytochrome oxidase subunit 1 (COI) gene, partial cds; mitochondrial	39.4	39.4	1	0.004	0.95	KR573490.1	313	....A................	333
563Select seq gb|KR573473.1|	Uroleucon sp. BOLD-2016 voucher BIOUG07658-E02 cytochrome oxidase subunit 1 (COI) gene, partial cds; mitochondrial	39.4	39.4	1	0.004	0.95	KR573473.1	313	....A................	333
564Select seq gb|KR573466.1|	Rhopalosiphum oxyacanthae voucher BIOUG04325-G12 cytochrome oxidase subunit 1 (COI) gene, partial cds; mitochondrial	39.4	39.4	1	0.004	0.95	KR573466.1	313	....A................	333
565Select seq gb|KR573449.1|	Calaphidinae sp. BOLD-2016 voucher BIOUG06901-A09 cytochrome oxidase subunit 1 (COI) gene, partial cds; mitochondrial	39.4	39.4	1	0.004	0.95	KR573449.1	313	....A................	333
566Select seq gb|KR573441.1|	Nearctaphis bakeri voucher BIOUG16115-B01 cytochrome oxidase subunit 1 (COI) gene, partial cds; mitochondrial	39.4	39.4	1	0.004	0.95	KR573441.1	243	....A................	263
567Select seq gb|KR573375.1|	Callipterinella sp. BOLD-2016 voucher BIOUG16041-E02 cytochrome oxidase subunit 1 (COI) gene, partial cds; mitochondrial	39.4	39.4	1	0.004	0.95	KR573375.1	313	....A................	333
568Select seq gb|KR573371.1|	Macrosiphum sp. BOLD-2016 voucher BIOUG06422-F06 cytochrome oxidase subunit 1 (COI) gene, partial cds; mitochondrial	39.4	39.4	1	0.004	0.95	KR573371.1	304	....A................	324
569Select seq gb|KR573354.1|	Calaphidinae sp. BOLD-2016 voucher BIOUG04196-A03 cytochrome oxidase subunit 1 (COI) gene, partial cds; mitochondrial	39.4	39.4	1	0.004	0.95	KR573354.1	313	....A................	333
570Select seq gb|KR573332.1|	Macrosiphum sp. BOLD-2016 voucher BIOUG09180-E03 cytochrome oxidase subunit 1 (COI) gene, partial cds; mitochondrial	39.4	39.4	1	0.004	0.95	KR573332.1	293	....A................	313
571Select seq gb|KR573304.1|	Rhopalosiphoninus sp. BOLD-2016 voucher BIOUG05931-E01 cytochrome oxidase subunit 1 (COI) gene, partial cds; mitochondrial	39.4	39.4	1	0.004	0.95	KR573304.1	313	....A................	333
572Select seq gb|KR573265.1|	Saltusaphidinae sp. BOLD-2016 voucher BIOUG06707-B08 cytochrome oxidase subunit 1 (COI) gene, partial cds; mitochondrial	39.4	39.4	1	0.004	0.95	KR573265.1	313	....A................	333
573Select seq gb|KR573245.1|	Hyperomyzus pallidus voucher BIOUG16129-C11 cytochrome oxidase subunit 1 (COI) gene, partial cds; mitochondrial	39.4	39.4	1	0.004	0.95	KR573245.1	312	....A................	332
574Select seq gb|KR573235.1|	Aphis rubicola voucher BIOUG04653-D03 cytochrome oxidase subunit 1 (COI) gene, partial cds; mitochondrial	39.4	39.4	1	0.004	0.95	KR573235.1	39	....A................	59
575Select seq gb|KR573224.1|	Aphis spiraecola voucher BIOUG07898-D06 cytochrome oxidase subunit 1 (COI) gene, partial cds; mitochondrial	39.4	39.4	1	0.004	0.95	KR573224.1	303	....A................	323
576Select seq gb|KR573195.1|	Amphorophora ampullata voucher BIOUG06739-C11 cytochrome oxidase subunit 1 (COI) gene, partial cds; mitochondrial	39.4	39.4	1	0.004	0.95	KR573195.1	304	....A................	324
577Select seq gb|KR573184.1|	Macrosiphum sp. BOLD-2016 voucher BIOUG09177-A08 cytochrome oxidase subunit 1 (COI) gene, partial cds; mitochondrial	39.4	39.4	1	0.004	0.95	KR573184.1	313	....A................	333
578Select seq gb|KR573182.1|	Brachycaudus cardui voucher BIOUG12856-C10 cytochrome oxidase subunit 1 (COI) gene, partial cds; mitochondrial	39.4	39.4	1	0.004	0.95	KR573182.1	312	....A................	332
579Select seq gb|KR573105.1|	Illinoia sp. BOLD-2016 voucher BIOUG04739-A02 cytochrome oxidase subunit 1 (COI) gene, partial cds; mitochondrial	39.4	39.4	1	0.004	0.95	KR573105.1	313	....A................	333
580Select seq gb|KR573078.1|	Macrosiphum pseudocoryli voucher BIOUG05090-B05 cytochrome oxidase subunit 1 (COI) gene, partial cds; mitochondrial	39.4	39.4	1	0.004	0.95	KR573078.1	60	....A................	80
581Select seq gb|KR573072.1|	Aphis sp. BOLD-2016 voucher BIOUG16054-A09 cytochrome oxidase subunit 1 (COI) gene, partial cds; mitochondrial	39.4	39.4	1	0.004	0.95	KR573072.1	303	....A................	323
582Select seq gb|KR573041.1|	Macrosiphum sp. BOLD-2016 voucher BIOUG09175-A12 cytochrome oxidase subunit 1 (COI) gene, partial cds; mitochondrial	39.4	39.4	1	0.004	0.95	KR573041.1	304	....A................	324
583Select seq gb|KR573028.1|	Chaetosiphon sp. BOLD-2016 voucher BIOUG07321-F07 cytochrome oxidase subunit 1 (COI) gene, partial cds; mitochondrial	39.4	39.4	1	0.004	0.95	KR573028.1	313	....A................	333
584Select seq gb|KR572997.1|	Rhopalomyzus sp. BOLD-2016 voucher BIOUG16146-A04 cytochrome oxidase subunit 1 (COI) gene, partial cds; mitochondrial	39.4	39.4	1	0.004	0.95	KR572997.1	300	....A................	320
585Select seq gb|KR572990.1|	Acyrthosiphon pisum voucher BIOUG10473-D01 cytochrome oxidase subunit 1 (COI) gene, partial cds; mitochondrial	39.4	39.4	1	0.004	0.95	KR572990.1	313	....A................	333
586Select seq gb|KR572971.1|	Chaitophorus sp. BOLD-2016 voucher BIOUG13487-A11 cytochrome oxidase subunit 1 (COI) gene, partial cds; mitochondrial	39.4	39.4	1	0.004	0.95	KR572971.1	303	....A................	323
587Select seq gb|KR572949.1|	Hyperomyzus picridis voucher BIOUG16008-B02 cytochrome oxidase subunit 1 (COI) gene, partial cds; mitochondrial	39.4	39.4	1	0.004	0.95	KR572949.1	261	....A................	281
588Select seq gb|KR572931.1|	Metcalfa pruinosa voucher BIOUG08378-A09 cytochrome oxidase subunit 1 (COI) gene, partial cds; mitochondrial	39.4	39.4	1	0.004	0.95	KR572931.1	171	....T................	191
589Select seq gb|KR572928.1|	Illinoia sp. BOLD-2016 voucher BIOUG09173-C02 cytochrome oxidase subunit 1 (COI) gene, partial cds; mitochondrial	39.4	39.4	1	0.004	0.95	KR572928.1	304	....A................	324
590Select seq gb|KR572927.1|	Aphis craccivora voucher BIOUG10391-H05 cytochrome oxidase subunit 1 (COI) gene, partial cds; mitochondrial	39.4	39.4	1	0.004	0.95	KR572927.1	314	....A................	334
591Select seq gb|KR572906.1|	Acyrthosiphon pisum voucher BIOUG08564-C06 cytochrome oxidase subunit 1 (COI) gene, partial cds; mitochondrial	39.4	39.4	1	0.004	0.95	KR572906.1	312	....A................	332
592Select seq gb|KR572877.1|	Uroleucon sp. BOLD-2016 voucher BIOUG06351-F10 cytochrome oxidase subunit 1 (COI) gene, partial cds; mitochondrial	39.4	39.4	1	0.004	0.95	KR572877.1	313	....A................	333
593Select seq gb|KR572844.1|	Amphorophora ampullata voucher BIOUG06525-B12 cytochrome oxidase subunit 1 (COI) gene, partial cds; mitochondrial	39.4	39.4	1	0.004	0.95	KR572844.1	305	....A................	325
594Select seq gb|KR572829.1|	Cinara mariana voucher BIOUG07159-G08 cytochrome oxidase subunit 1 (COI) gene, partial cds; mitochondrial	39.4	39.4	1	0.004	0.95	KR572829.1	313	....A................	333
595Select seq gb|KR572782.1|	Aphidinae sp. BOLD-2016 voucher BIOUG06314-C06 cytochrome oxidase subunit 1 (COI) gene, partial cds; mitochondrial	39.4	39.4	1	0.004	0.95	KR572782.1	313	....A................	333
596Select seq gb|KR572760.1|	Phorodon humuli voucher BIOUG16079-A08 cytochrome oxidase subunit 1 (COI) gene, partial cds; mitochondrial	39.4	39.4	1	0.004	0.95	KR572760.1	313	....A................	333
597Select seq gb|KR572742.1|	Calaphidinae sp. BOLD-2016 voucher BIOUG04197-F06 cytochrome oxidase subunit 1 (COI) gene, partial cds; mitochondrial	39.4	39.4	1	0.004	0.95	KR572742.1	313	....A................	333
598Select seq gb|KR572740.1|	Callipterinella sp. BOLD-2016 voucher BIOUG16131-E05 cytochrome oxidase subunit 1 (COI) gene, partial cds; mitochondrial	39.4	39.4	1	0.004	0.95	KR572740.1	300	....A................	320
599Select seq gb|KR572708.1|	Calaphidinae sp. BOLD-2016 voucher BIOUG04359-F09 cytochrome oxidase subunit 1 (COI) gene, partial cds; mitochondrial	39.4	39.4	1	0.004	0.95	KR572708.1	313	....A................	333
600Select seq gb|KR572669.1|	Macrosiphum sp. BOLD-2016 voucher BIOUG06358-C01 cytochrome oxidase subunit 1 (COI) gene, partial cds; mitochondrial	39.4	39.4	1	0.004	0.95	KR572669.1	305	....A................	325
601Select seq gb|KR572664.1|	Hyperomyzus lactucae voucher BIOUG04470-F12 cytochrome oxidase subunit 1 (COI) gene, partial cds; mitochondrial	39.4	39.4	1	0.004	0.95	KR572664.1	313	....A................	333
602Select seq gb|KR572634.1|	Monellia sp. BOLD-2016 voucher BIOUG07002-A09 cytochrome oxidase subunit 1 (COI) gene, partial cds; mitochondrial	39.4	39.4	1	0.004	0.95	KR572634.1	305	....A................	325
603Select seq gb|KR572627.1|	Hyperomyzus picridis voucher BIOUG16087-A09 cytochrome oxidase subunit 1 (COI) gene, partial cds; mitochondrial	39.4	39.4	1	0.004	0.95	KR572627.1	303	....A................	323
604Select seq gb|KR572605.1|	Macrosiphum sp. BOLD-2016 voucher 10BBCHEM-0260 cytochrome oxidase subunit 1 (COI) gene, partial cds; mitochondrial	39.4	39.4	1	0.004	0.95	KR572605.1	313	....A................	333
605Select seq gb|KR572577.1|	Tetraneura ulmi voucher BIOUG08337-G01 cytochrome oxidase subunit 1 (COI) gene, partial cds; mitochondrial	39.4	39.4	1	0.004	0.95	KR572577.1	303	....A................	323
606Select seq gb|KR572567.1|	Macrosiphum sp. BOLD-2016 voucher BIOUG09237-A03 cytochrome oxidase subunit 1 (COI) gene, partial cds; mitochondrial	39.4	39.4	1	0.004	0.95	KR572567.1	286	....A................	306
607Select seq gb|KR572540.1|	Macrosiphum sp. BOLD-2016 voucher BIOUG06641-C11 cytochrome oxidase subunit 1 (COI) gene, partial cds; mitochondrial	39.4	39.4	1	0.004	0.95	KR572540.1	313	....A................	333
608Select seq gb|KR572539.1|	Nearctaphis bakeri voucher BIOUG16129-A02 cytochrome oxidase subunit 1 (COI) gene, partial cds; mitochondrial	39.4	39.4	1	0.004	0.95	KR572539.1	312	....A................	332
609Select seq gb|KR572509.1|	Calaphidinae sp. BOLD-2016 voucher BIOUG03716-B08 cytochrome oxidase subunit 1 (COI) gene, partial cds; mitochondrial	39.4	39.4	1	0.004	0.95	KR572509.1	313	....A................	333
610Select seq gb|KR572503.1|	Uroleucon sp. BOLD-2016 voucher BIOUG09177-A04 cytochrome oxidase subunit 1 (COI) gene, partial cds; mitochondrial	39.4	39.4	1	0.004	0.95	KR572503.1	313	....A................	333
611Select seq gb|KR572488.1|	Metopolophium dirhodum voucher BIOUG16130-F08 cytochrome oxidase subunit 1 (COI) gene, partial cds; mitochondrial	39.4	39.4	1	0.004	0.95	KR572488.1	312	....A................	332
612Select seq gb|KR572463.1|	Macrosiphum sp. BOLD-2016 voucher BIOUG09175-C06 cytochrome oxidase subunit 1 (COI) gene, partial cds; mitochondrial	39.4	39.4	1	0.004	0.95	KR572463.1	297	....A................	317
613Select seq gb|KR572444.1|	Brachycaudus helichrysi voucher BIOUG13349-H09 cytochrome oxidase subunit 1 (COI) gene, partial cds; mitochondrial	39.4	39.4	1	0.004	0.95	KR572444.1	309	....A................	329
614Select seq gb|KR572419.1|	Illinoia sp. BOLD-2016 voucher BIOUG09177-H10 cytochrome oxidase subunit 1 (COI) gene, partial cds; mitochondrial	39.4	39.4	1	0.004	0.95	KR572419.1	298	....A................	318
615Select seq gb|KR572378.1|	Hyperomyzus pallidus voucher BIOUG10362-B12 cytochrome oxidase subunit 1 (COI) gene, partial cds; mitochondrial	39.4	39.4	1	0.004	0.95	KR572378.1	305	....A................	325
616Select seq gb|KR572374.1|	Macrosiphum sp. BOLD-2016 voucher BIOUG09177-B05 cytochrome oxidase subunit 1 (COI) gene, partial cds; mitochondrial	39.4	39.4	1	0.004	0.95	KR572374.1	313	....A................	333
617Select seq gb|KR918786.1|	Cinara mariana voucher BIOUG17666-A02 cytochrome oxidase subunit 1 (COI) gene, partial cds; mitochondrial	39.4	39.4	1	0.004	0.95	KR918786.1	312	....A................	332
618Select seq gb|KR918588.1|	Mindarus obliquus voucher BIOUG14375-D06 cytochrome oxidase subunit 1 (COI) gene, partial cds; mitochondrial	39.4	39.4	1	0.004	0.95	KR918588.1	309	....A................	329
619Select seq gb|KR918546.1|	Cinara nimbata voucher BIOUG18435-A05 cytochrome oxidase subunit 1 (COI) gene, partial cds; mitochondrial	39.4	39.4	1	0.004	0.95	KR918546.1	300	....A................	320
620Select seq gb|KR918435.1|	Macrosiphum sp. BOLD-2016 voucher BIOUG15988-A12 cytochrome oxidase subunit 1 (COI) gene, partial cds; mitochondrial	39.4	39.4	1	0.004	0.95	KR918435.1	285	....A................	305
621Select seq gb|KR918421.1|	Cinara sp. BOLD-2016 voucher BIOUG18435-E05 cytochrome oxidase subunit 1 (COI) gene, partial cds; mitochondrial	39.4	39.4	1	0.004	0.95	KR918421.1	303	....A................	323
622Select seq gb|KR918358.1|	Macrosiphum sp. BOLD-2016 voucher BIOUG17143-E10 cytochrome oxidase subunit 1 (COI) gene, partial cds; mitochondrial	39.4	39.4	1	0.004	0.95	KR918358.1	303	....A................	323
623Select seq gb|KR918353.1|	Protaphis middletonii voucher BIOUG15988-F03 cytochrome oxidase subunit 1 (COI) gene, partial cds; mitochondrial	39.4	39.4	1	0.004	0.95	KR918353.1	303	....A................	323
624Select seq gb|KR918267.1|	Macrosiphum sp. BOLD-2016 voucher BIOUG17697-B03 cytochrome oxidase subunit 1 (COI) gene, partial cds; mitochondrial	39.4	39.4	1	0.004	0.95	KR918267.1	303	....A................	323
625Select seq gb|KR918255.1|	Illinoia azaleae voucher BIOUG17666-A04 cytochrome oxidase subunit 1 (COI) gene, partial cds; mitochondrial	39.4	39.4	1	0.004	0.95	KR918255.1	312	....A................	332
626Select seq gb|KR918241.1|	Protaphis middletonii voucher BIOUG19490-A11 cytochrome oxidase subunit 1 (COI) gene, partial cds; mitochondrial	39.4	39.4	1	0.004	0.95	KR918241.1	312	....A................	332
627Select seq gb|KR918226.1|	Aulacorthum pterinigrum voucher BIOUG17922-E04 cytochrome oxidase subunit 1 (COI) gene, partial cds; mitochondrial	39.4	39.4	1	0.004	0.95	KR918226.1	303	....A................	323
628Select seq gb|KR918216.1|	Protaphis middletonii voucher BIOUG19490-B03 cytochrome oxidase subunit 1 (COI) gene, partial cds; mitochondrial	39.4	39.4	1	0.004	0.95	KR918216.1	312	....A................	332
629Select seq gb|KR918213.1|	Cinara nimbata voucher BIOUG18435-A06 cytochrome oxidase subunit 1 (COI) gene, partial cds; mitochondrial	39.4	39.4	1	0.004	0.95	KR918213.1	258	....A................	278
630Select seq gb|KR918182.1|	Aphidinae sp. BOLD-2016 voucher BIOUG19490-C07 cytochrome oxidase subunit 1 (COI) gene, partial cds; mitochondrial	39.4	39.4	1	0.004	0.95	KR918182.1	312	....A................	332
631Select seq gb|KR918089.1|	Macrosiphum sp. BOLD-2016 voucher BIOUG15988-A09 cytochrome oxidase subunit 1 (COI) gene, partial cds; mitochondrial	39.4	39.4	1	0.004	0.95	KR918089.1	261	....A................	281
632Select seq gb|KR918053.1|	Cinara mariana voucher BIOUG15988-B12 cytochrome oxidase subunit 1 (COI) gene, partial cds; mitochondrial	39.4	39.4	1	0.004	0.95	KR918053.1	303	....A................	323
633Select seq gb|KR917994.1|	Protaphis middletonii voucher BIOUG15995-A06 cytochrome oxidase subunit 1 (COI) gene, partial cds; mitochondrial	39.4	39.4	1	0.004	0.95	KR917994.1	303	....A................	323
634Select seq gb|KR917989.1|	Aphidinae sp. BOLD-2016 voucher BIOUG12701-H05 cytochrome oxidase subunit 1 (COI) gene, partial cds; mitochondrial	39.4	39.4	1	0.004	0.95	KR917989.1	312	....A................	332
635Select seq gb|KR917983.1|	Aphidinae sp. BOLD-2016 voucher BIOUG18858-H11 cytochrome oxidase subunit 1 (COI) gene, partial cds; mitochondrial	39.4	39.4	1	0.004	0.95	KR917983.1	312	....A................	332
636Select seq gb|KR917967.1|	Tetraneura ulmi voucher BIOUG18858-E06 cytochrome oxidase subunit 1 (COI) gene, partial cds; mitochondrial	39.4	39.4	1	0.004	0.95	KR917967.1	303	....A................	323
637Select seq gb|KR917910.1|	Mindarus obliquus voucher BIOUG15988-B11 cytochrome oxidase subunit 1 (COI) gene, partial cds; mitochondrial	39.4	39.4	1	0.004	0.95	KR917910.1	303	....A................	323
638Select seq gb|KR917853.1|	Illinoia azaleae voucher BIOUG17666-D12 cytochrome oxidase subunit 1 (COI) gene, partial cds; mitochondrial	39.4	39.4	1	0.004	0.95	KR917853.1	303	....A................	323
639Select seq gb|KR917845.1|	Aphidinae sp. BOLD-2016 voucher BIOUG18362-B02 cytochrome oxidase subunit 1 (COI) gene, partial cds; mitochondrial	39.4	39.4	1	0.004	0.95	KR917845.1	303	....A................	323
640Select seq gb|KR917818.1|	Protaphis middletonii voucher BIOUG15988-E10 cytochrome oxidase subunit 1 (COI) gene, partial cds; mitochondrial	39.4	39.4	1	0.004	0.95	KR917818.1	300	....A................	320
641Select seq gb|KR917762.1|	Uroleucon sp. BOLD-2016 voucher BIOUG15988-G02 cytochrome oxidase subunit 1 (COI) gene, partial cds; mitochondrial	39.4	39.4	1	0.004	0.95	KR917762.1	303	....A................	323
642Select seq gb|KR917754.1|	Illinoia sp. BOLD-2016 voucher BIOUG19346-B02 cytochrome oxidase subunit 1 (COI) gene, partial cds; mitochondrial	39.4	39.4	1	0.004	0.95	KR917754.1	303	....A................	323
643Select seq gb|KR917707.1|	Aphidinae sp. BOLD-2016 voucher BIOUG19490-G12 cytochrome oxidase subunit 1 (COI) gene, partial cds; mitochondrial	39.4	39.4	1	0.004	0.95	KR917707.1	303	....A................	323
644Select seq gb|KR917693.1|	Cinara nimbata voucher BIOUG18435-B05 cytochrome oxidase subunit 1 (COI) gene, partial cds; mitochondrial	39.4	39.4	1	0.004	0.95	KR917693.1	303	....A................	323
645Select seq gb|KR917682.1|	Illinoia sp. BOLD-2016 voucher BIOUG17922-B08 cytochrome oxidase subunit 1 (COI) gene, partial cds; mitochondrial	39.4	39.4	1	0.004	0.95	KR917682.1	208	....A................	228
646Select seq gb|KR917613.1|	Illinoia azaleae voucher BIOUG17666-E01 cytochrome oxidase subunit 1 (COI) gene, partial cds; mitochondrial	39.4	39.4	1	0.004	0.95	KR917613.1	300	....A................	320
647Select seq gb|KR917611.1|	Cinara nimbata voucher BIOUG18435-A04 cytochrome oxidase subunit 1 (COI) gene, partial cds; mitochondrial	39.4	39.4	1	0.004	0.95	KR917611.1	303	....A................	323
648Select seq gb|KR917598.1|	Chaitophorus pallipes voucher BIOUG10028-D08 cytochrome oxidase subunit 1 (COI) gene, partial cds; mitochondrial	39.4	39.4	1	0.004	0.95	KR917598.1	314	....A................	334
649Select seq gb|KR917574.1|	Protaphis middletonii voucher BIOUG15995-A04 cytochrome oxidase subunit 1 (COI) gene, partial cds; mitochondrial	39.4	39.4	1	0.004	0.95	KR917574.1	303	....A................	323
650Select seq gb|KR917554.1|	Cinara mariana voucher BIOUG14375-E01 cytochrome oxidase subunit 1 (COI) gene, partial cds; mitochondrial	39.4	39.4	1	0.004	0.95	KR917554.1	303	....A................	323
651Select seq gb|KR917477.1|	Illinoia azaleae voucher BIOUG18858-E01 cytochrome oxidase subunit 1 (COI) gene, partial cds; mitochondrial	39.4	39.4	1	0.004	0.95	KR917477.1	303	....A................	323
652Select seq gb|KR917443.1|	Aphidinae sp. BOLD-2016 voucher BIOUG19490-A05 cytochrome oxidase subunit 1 (COI) gene, partial cds; mitochondrial	39.4	39.4	1	0.004	0.95	KR917443.1	312	....A................	332
653Select seq gb|KR917419.1|	Aphidinae sp. BOLD-2016 voucher BIOUG19490-G11 cytochrome oxidase subunit 1 (COI) gene, partial cds; mitochondrial	39.4	39.4	1	0.004	0.95	KR917419.1	303	....A................	323
654Select seq gb|KR917344.1|	Tamalia coweni voucher BIOUG18435-G10 cytochrome oxidase subunit 1 (COI) gene, partial cds; mitochondrial	39.4	39.4	1	0.004	0.95	KR917344.1	303	....A................	323
655Select seq gb|KR917331.1|	Cinara mariana voucher BIOUG11315-G02 cytochrome oxidase subunit 1 (COI) gene, partial cds; mitochondrial	39.4	39.4	1	0.004	0.95	KR917331.1	305	....A................	325
656Select seq gb|KR917324.1|	Aphidinae sp. BOLD-2016 voucher BIOUG19490-F09 cytochrome oxidase subunit 1 (COI) gene, partial cds; mitochondrial	39.4	39.4	1	0.004	0.95	KR917324.1	312	....A................	332
657Select seq gb|KR917265.1|	Mindarus obliquus voucher BIOUG14375-C12 cytochrome oxidase subunit 1 (COI) gene, partial cds; mitochondrial	39.4	39.4	1	0.004	0.95	KR917265.1	303	....A................	323
658Select seq gb|KR917256.1|	Illinoia azaleae voucher BIOUG18858-G07 cytochrome oxidase subunit 1 (COI) gene, partial cds; mitochondrial	39.4	39.4	1	0.004	0.95	KR917256.1	303	....A................	323
659Select seq gb|KR917199.1|	Aphidinae sp. BOLD-2016 voucher BIOUG19490-H01 cytochrome oxidase subunit 1 (COI) gene, partial cds; mitochondrial	39.4	39.4	1	0.004	0.95	KR917199.1	303	....A................	323
660Select seq gb|KR917169.1|	Myzus lythri voucher BIOUG19490-F08 cytochrome oxidase subunit 1 (COI) gene, partial cds; mitochondrial	39.4	39.4	1	0.004	0.95	KR917169.1	303	....A................	323
661Select seq gb|KR917132.1|	Illinoia azaleae voucher BIOUG18858-F12 cytochrome oxidase subunit 1 (COI) gene, partial cds; mitochondrial	39.4	39.4	1	0.004	0.95	KR917132.1	303	....A................	323
662Select seq gb|KR917121.1|	Uroleucon achilleae voucher BIOUG19346-F01 cytochrome oxidase subunit 1 (COI) gene, partial cds; mitochondrial	39.4	39.4	1	0.004	0.95	KR917121.1	303	....A................	323
663Select seq gb|KR917116.1|	Aphidinae sp. BOLD-2016 voucher BIOUG18435-H09 cytochrome oxidase subunit 1 (COI) gene, partial cds; mitochondrial	39.4	39.4	1	0.004	0.95	KR917116.1	303	....A................	323
664Select seq gb|KR917086.1|	Illinoia azaleae voucher BIOUG17666-H09 cytochrome oxidase subunit 1 (COI) gene, partial cds; mitochondrial	39.4	39.4	1	0.004	0.95	KR917086.1	303	....A................	323
665Select seq gb|KR917078.1|	Illinoia azaleae voucher BIOUG14375-C11 cytochrome oxidase subunit 1 (COI) gene, partial cds; mitochondrial	39.4	39.4	1	0.004	0.95	KR917078.1	303	....A................	323
666Select seq gb|KR917062.1|	Illinoia azaleae voucher BIOUG18858-G05 cytochrome oxidase subunit 1 (COI) gene, partial cds; mitochondrial	39.4	39.4	1	0.004	0.95	KR917062.1	303	....A................	323
667Select seq gb|KR917046.1|	Schizaphis graminum voucher BIOUG18362-B05 cytochrome oxidase subunit 1 (COI) gene, partial cds; mitochondrial	39.4	39.4	1	0.004	0.95	KR917046.1	303	....A................	323
668Select seq gb|KR917042.1|	Macrosiphum sp. BOLD-2016 voucher BIOUG14375-H09 cytochrome oxidase subunit 1 (COI) gene, partial cds; mitochondrial	39.4	39.4	1	0.004	0.95	KR917042.1	303	....A................	323
669Select seq gb|KR917019.1|	Illinoia sp. BOLD-2016 voucher BIOUG17922-B06 cytochrome oxidase subunit 1 (COI) gene, partial cds; mitochondrial	39.4	39.4	1	0.004	0.95	KR917019.1	303	....A................	323
670Select seq gb|KR584621.1|	Uroleucon sp. BOLD-2016 voucher BIOUG06513-A05 cytochrome oxidase subunit 1 (COI) gene, partial cds; mitochondrial	39.4	39.4	1	0.004	0.95	KR584621.1	304	....A................	324
671Select seq gb|KR584599.1|	Saltusaphidinae sp. BOLD-2016 voucher BIOUG05961-E11 cytochrome oxidase subunit 1 (COI) gene, partial cds; mitochondrial	39.4	39.4	1	0.004	0.95	KR584599.1	313	....A................	333
672Select seq gb|KR584582.1|	Schizolachnus obscurus voucher BIOUG07700-D05 cytochrome oxidase subunit 1 (COI) gene, partial cds; mitochondrial	39.4	39.4	1	0.004	0.95	KR584582.1	312	....A................	332
673Select seq gb|KR584579.1|	Cavariella konoi voucher BIOUG06769-B04 cytochrome oxidase subunit 1 (COI) gene, partial cds; mitochondrial	39.4	39.4	1	0.004	0.95	KR584579.1	305	....A................	325
674Select seq gb|KR584550.1|	Macrosiphum sp. BOLD-2016 voucher BIOUG04572-G03 cytochrome oxidase subunit 1 (COI) gene, partial cds; mitochondrial	39.4	39.4	1	0.004	0.95	KR584550.1	313	....A................	333
675Select seq gb|KR584489.1|	Aphidinae sp. BOLD-2016 voucher BIOUG16130-G05 cytochrome oxidase subunit 1 (COI) gene, partial cds; mitochondrial	39.4	39.4	1	0.004	0.95	KR584489.1	312	....A................	332
676Select seq gb|KR584479.1|	Calaphidinae sp. BOLD-2016 voucher BIOUG03716-C12 cytochrome oxidase subunit 1 (COI) gene, partial cds; mitochondrial	39.4	39.4	1	0.004	0.95	KR584479.1	313	....A................	333
677Select seq gb|KR584476.1|	Macrosiphum sp. BOLD-2016 voucher BIOUG06358-F08 cytochrome oxidase subunit 1 (COI) gene, partial cds; mitochondrial	39.4	39.4	1	0.004	0.95	KR584476.1	304	....A................	324
678Select seq gb|KR584466.1|	Calaphidinae sp. BOLD-2016 voucher BIOUG03541-A07 cytochrome oxidase subunit 1 (COI) gene, partial cds; mitochondrial	39.4	39.4	1	0.004	0.95	KR584466.1	313	....A................	333
679Select seq gb|KR584455.1|	Chaitophorus populicola voucher BIOUG16152-B10 cytochrome oxidase subunit 1 (COI) gene, partial cds; mitochondrial	39.4	39.4	1	0.004	0.95	KR584455.1	312	....A................	332
680Select seq gb|KR584443.1|	Calaphidinae sp. BOLD-2016 voucher BIOUG04097-F06 cytochrome oxidase subunit 1 (COI) gene, partial cds; mitochondrial	39.4	39.4	1	0.004	0.95	KR584443.1	313	....A................	333
681Select seq gb|KR584427.1|	Aphis glycines voucher BIOUG09934-H01 cytochrome oxidase subunit 1 (COI) gene, partial cds; mitochondrial	39.4	39.4	1	0.004	0.95	KR584427.1	315	....A................	335
682Select seq gb|KR584423.1|	Aulacorthum solani voucher BIOUG08005-D07 cytochrome oxidase subunit 1 (COI) gene, partial cds; mitochondrial	39.4	39.4	1	0.004	0.95	KR584423.1	312	....A................	332
683Select seq gb|KR584412.1|	Myzus persicae voucher BIOUG08415-A09 cytochrome oxidase subunit 1 (COI) gene, partial cds; mitochondrial	39.4	39.4	1	0.004	0.95	KR584412.1	303	....A................	323
684Select seq gb|KR584407.1|	Metopolophium dirhodum voucher BIOUG16018-C06 cytochrome oxidase subunit 1 (COI) gene, partial cds; mitochondrial	39.4	39.4	1	0.004	0.95	KR584407.1	313	....A................	333
685Select seq gb|KR584396.1|	Illinoia sp. BOLD-2016 voucher BIOUG09175-E10 cytochrome oxidase subunit 1 (COI) gene, partial cds; mitochondrial	39.4	39.4	1	0.004	0.95	KR584396.1	300	....A................	320
686Select seq gb|KR584384.1|	Aphidinae sp. BOLD-2016 voucher BIOUG05473-F09 cytochrome oxidase subunit 1 (COI) gene, partial cds; mitochondrial	39.4	39.4	1	0.004	0.95	KR584384.1	303	....A................	323
687Select seq gb|KR584383.1|	Macrosiphum sp. BOLD-2016 voucher BIOUG08284-F08 cytochrome oxidase subunit 1 (COI) gene, partial cds; mitochondrial	39.4	39.4	1	0.004	0.95	KR584383.1	303	....A................	323
688Select seq gb|KR584357.1|	Phorodon humuli voucher BIOUG16125-C08 cytochrome oxidase subunit 1 (COI) gene, partial cds; mitochondrial	39.4	39.4	1	0.004	0.95	KR584357.1	288	....A................	308
689Select seq gb|KR584355.1|	Macrosiphum sp. BOLD-2016 voucher BIOUG09237-E09 cytochrome oxidase subunit 1 (COI) gene, partial cds; mitochondrial	39.4	39.4	1	0.004	0.95	KR584355.1	302	....A................	322
690Select seq gb|KR584309.1|	Illinoia sp. BOLD-2016 voucher BIOUG09623-H01 cytochrome oxidase subunit 1 (COI) gene, partial cds; mitochondrial	39.4	39.4	1	0.004	0.95	KR584309.1	297	....A................	317
691Select seq gb|KR584286.1|	Uroleucon sp. BOLD-2016 voucher BIOUG05961-B02 cytochrome oxidase subunit 1 (COI) gene, partial cds; mitochondrial	39.4	39.4	1	0.004	0.95	KR584286.1	313	....A................	333
692Select seq gb|KR584254.1|	Macrosiphum sp. BOLD-2016 voucher BIOUG06252-D02 cytochrome oxidase subunit 1 (COI) gene, partial cds; mitochondrial	39.4	39.4	1	0.004	0.95	KR584254.1	313	....A................	333
693Select seq gb|KR584222.1|	Acyrthosiphon pisum voucher BIOUG14258-G06 cytochrome oxidase subunit 1 (COI) gene, partial cds; mitochondrial	39.4	39.4	1	0.004	0.95	KR584222.1	303	....A................	323
694Select seq gb|KR584215.1|	Metcalfa pruinosa voucher BIOUG08321-C03 cytochrome oxidase subunit 1 (COI) gene, partial cds; mitochondrial	39.4	39.4	1	0.004	0.95	KR584215.1	305	....T................	325
695Select seq gb|KR584206.1|	Metopolophium dirhodum voucher BIOUG16130-B11 cytochrome oxidase subunit 1 (COI) gene, partial cds; mitochondrial	39.4	39.4	1	0.004	0.95	KR584206.1	216	....A................	236
696Select seq gb|KR584192.1|	Lipaphis pseudobrassicae voucher BIOUG03140-H07 cytochrome oxidase subunit 1 (COI) gene, partial cds; mitochondrial	39.4	39.4	1	0.004	0.95	KR584192.1	313	....A................	333
697Select seq gb|KR584136.1|	Macrosiphoniella sp. BOLD-2016 voucher BIOUG01663-C10 cytochrome oxidase subunit 1 (COI) gene, partial cds; mitochondrial	39.4	39.4	1	0.004	0.95	KR584136.1	313	....A................	333
698Select seq gb|KR584085.1|	Cinara mariana voucher BIOUG13141-B01 cytochrome oxidase subunit 1 (COI) gene, partial cds; mitochondrial	39.4	39.4	1	0.004	0.95	KR584085.1	313	....A................	333
699Select seq gb|KR584082.1|	Calaphidinae sp. BOLD-2016 voucher BIOUG07771-G10 cytochrome oxidase subunit 1 (COI) gene, partial cds; mitochondrial	39.4	39.4	1	0.004	0.95	KR584082.1	303	....A................	323
700Select seq gb|KR584068.1|	Calaphidinae sp. BOLD-2016 voucher BIOUG04197-C04 cytochrome oxidase subunit 1 (COI) gene, partial cds; mitochondrial	39.4	39.4	1	0.004	0.95	KR584068.1	313	....A................	333
701Select seq gb|KR584063.1|	Calaphidinae sp. BOLD-2016 voucher BIOUG03696-C06 cytochrome oxidase subunit 1 (COI) gene, partial cds; mitochondrial	39.4	39.4	1	0.004	0.95	KR584063.1	313	....A................	333
702Select seq gb|KR584053.1|	Myzus hemerocallis voucher BIOUG16045-C08 cytochrome oxidase subunit 1 (COI) gene, partial cds; mitochondrial	39.4	39.4	1	0.004	0.95	KR584053.1	303	....A................	323
703Select seq gb|KR584047.1|	Calaphidinae sp. BOLD-2016 voucher BIOUG03852-E03 cytochrome oxidase subunit 1 (COI) gene, partial cds; mitochondrial	39.4	39.4	1	0.004	0.95	KR584047.1	313	....A................	333
704Select seq gb|KR584036.1|	Chaetosiphon sp. BOLD-2016 voucher BIOUG05090-B07 cytochrome oxidase subunit 1 (COI) gene, partial cds; mitochondrial	39.4	39.4	1	0.004	0.95	KR584036.1	312	....A................	332
705Select seq gb|KR584035.1|	Gypsoaphis sp. BOLD-2016 voucher BIOUG04874-F11 cytochrome oxidase subunit 1 (COI) gene, partial cds; mitochondrial	39.4	39.4	1	0.004	0.95	KR584035.1	313	....A................	333
706Select seq gb|KR584029.1|	Calaphidinae sp. BOLD-2016 voucher BIOUG06799-H11 cytochrome oxidase subunit 1 (COI) gene, partial cds; mitochondrial	39.4	39.4	1	0.004	0.95	KR584029.1	313	....A................	333
707Select seq gb|KR584028.1|	Saltusaphidinae sp. BOLD-2016 voucher BIOUG06661-G01 cytochrome oxidase subunit 1 (COI) gene, partial cds; mitochondrial	39.4	39.4	1	0.004	0.95	KR584028.1	313	....A................	333
708Select seq gb|KR584027.1|	Myzus cerasi voucher BIOUG16130-B03 cytochrome oxidase subunit 1 (COI) gene, partial cds; mitochondrial	39.4	39.4	1	0.004	0.95	KR584027.1	312	....A................	332
709Select seq gb|KR583973.1|	Macrosiphum sp. BOLD-2016 voucher BIOUG05100-C08 cytochrome oxidase subunit 1 (COI) gene, partial cds; mitochondrial	39.4	39.4	1	0.004	0.95	KR583973.1	231	....A................	251
710Select seq gb|KR583968.1|	Macrosiphum sp. BOLD-2016 voucher BIOUG09177-D03 cytochrome oxidase subunit 1 (COI) gene, partial cds; mitochondrial	39.4	39.4	1	0.004	0.95	KR583968.1	313	....A................	333
711Select seq gb|KR583952.1|	Saltusaphidinae sp. BOLD-2016 voucher BIOUG06859-D09 cytochrome oxidase subunit 1 (COI) gene, partial cds; mitochondrial	39.4	39.4	1	0.004	0.95	KR583952.1	300	....A................	320
712Select seq gb|KR583928.1|	Calaphidinae sp. BOLD-2016 voucher BIOUG03696-E07 cytochrome oxidase subunit 1 (COI) gene, partial cds; mitochondrial	39.4	39.4	1	0.004	0.95	KR583928.1	313	....A................	333
713Select seq gb|KR583926.1|	Illinoia sp. BOLD-2016 voucher BIOUG09177-E03 cytochrome oxidase subunit 1 (COI) gene, partial cds; mitochondrial	39.4	39.4	1	0.004	0.95	KR583926.1	304	....A................	324
714Select seq gb|KR583918.1|	Metcalfa pruinosa voucher BIOUG08500-E09 cytochrome oxidase subunit 1 (COI) gene, partial cds; mitochondrial	39.4	39.4	1	0.004	0.95	KR583918.1	303	....T................	323
715Select seq gb|KR583887.1|	Macrosiphum sp. BOLD-2016 voucher BIOUG09180-C05 cytochrome oxidase subunit 1 (COI) gene, partial cds; mitochondrial	39.4	39.4	1	0.004	0.95	KR583887.1	313	....A................	333
716Select seq gb|KR583873.1|	Calaphidinae sp. BOLD-2016 voucher BIOUG03360-C02 cytochrome oxidase subunit 1 (COI) gene, partial cds; mitochondrial	39.4	39.4	1	0.004	0.95	KR583873.1	313	....A................	333
717Select seq gb|KR583864.1|	Lipaphis pseudobrassicae voucher BIOUG03140-H04 cytochrome oxidase subunit 1 (COI) gene, partial cds; mitochondrial	39.4	39.4	1	0.004	0.95	KR583864.1	313	....A................	333
718Select seq gb|KR583829.1|	Macrosiphum sp. BOLD-2016 voucher BIOUG07966-E03 cytochrome oxidase subunit 1 (COI) gene, partial cds; mitochondrial	39.4	39.4	1	0.004	0.95	KR583829.1	312	....A................	332
719Select seq gb|KR583813.1|	Macrosiphum sp. BOLD-2016 voucher BIOUG04874-H02 cytochrome oxidase subunit 1 (COI) gene, partial cds; mitochondrial	39.4	39.4	1	0.004	0.95	KR583813.1	303	....A................	323
720Select seq gb|KR583810.1|	Aphidinae sp. BOLD-2016 voucher 10BBCHEM-0585 cytochrome oxidase subunit 1 (COI) gene, partial cds; mitochondrial	39.4	39.4	1	0.004	0.95	KR583810.1	263	....A................	283
721Select seq gb|KR583804.1|	Callipterinella sp. BOLD-2016 voucher BIOUG16097-B03 cytochrome oxidase subunit 1 (COI) gene, partial cds; mitochondrial	39.4	39.4	1	0.004	0.95	KR583804.1	303	....A................	323
722Select seq gb|KR583801.1|	Acyrthosiphon pisum voucher BIOUG14258-D08 cytochrome oxidase subunit 1 (COI) gene, partial cds; mitochondrial	39.4	39.4	1	0.004	0.95	KR583801.1	303	....A................	323
723Select seq gb|KR583758.1|	Periphyllus testudinaceus voucher BIOUG12028-G03 cytochrome oxidase subunit 1 (COI) gene, partial cds; mitochondrial	39.4	39.4	1	0.004	0.95	KR583758.1	303	....A................	323
724Select seq gb|KR583754.1|	Calaphidinae sp. BOLD-2016 voucher BIOUG04196-G02 cytochrome oxidase subunit 1 (COI) gene, partial cds; mitochondrial	39.4	39.4	1	0.004	0.95	KR583754.1	313	....A................	333
725Select seq gb|KR583697.1|	Macrosiphum sp. BOLD-2016 voucher BIOUG05111-E04 cytochrome oxidase subunit 1 (COI) gene, partial cds; mitochondrial	39.4	39.4	1	0.004	0.95	KR583697.1	300	....A................	320
726Select seq gb|KR583695.1|	Calaphis flava voucher BIOUG01236-A01 cytochrome oxidase subunit 1 (COI) gene, partial cds; mitochondrial	39.4	39.4	1	0.004	0.95	KR583695.1	313	....A................	333
727Select seq gb|KR583685.1|	Cinara mariana voucher BIOUG09461-C04 cytochrome oxidase subunit 1 (COI) gene, partial cds; mitochondrial	39.4	39.4	1	0.004	0.95	KR583685.1	303	....A................	323
728Select seq gb|KR583679.1|	Cinara sp. BOLD-2016 voucher BIOUG06155-A01 cytochrome oxidase subunit 1 (COI) gene, partial cds; mitochondrial	39.4	39.4	1	0.004	0.95	KR583679.1	313	....A................	333
729Select seq gb|KR583569.1|	Periphyllus negundinis voucher BIOUG13927-B04 cytochrome oxidase subunit 1 (COI) gene, partial cds; mitochondrial	39.4	39.4	1	0.004	0.95	KR583569.1	303	....A................	323
730Select seq gb|KR583545.1|	Metopolophium sp. BOLD-2016 voucher BIOUG09028-G04 cytochrome oxidase subunit 1 (COI) gene, partial cds; mitochondrial	39.4	39.4	1	0.004	0.95	KR583545.1	300	....A................	320
731Select seq gb|KR583528.1|	Aphis craccivora voucher BIOUG03140-D09 cytochrome oxidase subunit 1 (COI) gene, partial cds; mitochondrial	39.4	39.4	1	0.004	0.95	KR583528.1	313	....A................	333
732Select seq gb|KR583519.1|	Uroleucon sonchi voucher BIOUG08001-A06 cytochrome oxidase subunit 1 (COI) gene, partial cds; mitochondrial	39.4	39.4	1	0.004	0.95	KR583519.1	312	....A................	332
733Select seq gb|KR583515.1|	Rhopalosiphum oxyacanthae voucher BIOUG16133-F06 cytochrome oxidase subunit 1 (COI) gene, partial cds; mitochondrial	39.4	39.4	1	0.004	0.95	KR583515.1	312	....A................	332
734Select seq gb|KR583503.1|	Aphis pentstemonicola voucher BIOUG06939-D03 cytochrome oxidase subunit 1 (COI) gene, partial cds; mitochondrial	39.4	39.4	1	0.004	0.95	KR583503.1	305	....A................	325
735Select seq gb|KR583501.1|	Aphis glycines voucher BIOUG16021-E05 cytochrome oxidase subunit 1 (COI) gene, partial cds; mitochondrial	39.4	39.4	1	0.004	0.95	KR583501.1	300	....A................	320
736Select seq gb|KR583489.1|	Aphis spiraecola voucher BIOUG08805-B05 cytochrome oxidase subunit 1 (COI) gene, partial cds; mitochondrial	39.4	39.4	1	0.004	0.95	KR583489.1	305	....A................	325
737Select seq gb|KR583468.1|	Metopolophium dirhodum voucher BIOUG06637-E10 cytochrome oxidase subunit 1 (COI) gene, partial cds; mitochondrial	39.4	39.4	1	0.004	0.95	KR583468.1	313	....A................	333
738Select seq gb|KR583414.1|	Illinoia azaleae voucher BIOUG13141-B08 cytochrome oxidase subunit 1 (COI) gene, partial cds; mitochondrial	39.4	39.4	1	0.004	0.95	KR583414.1	313	....A................	333
739Select seq gb|KR583387.1|	Protaphis middletonii voucher BIOUG05062-C09 cytochrome oxidase subunit 1 (COI) gene, partial cds; mitochondrial	39.4	39.4	1	0.004	0.95	KR583387.1	219	....A................	239
740Select seq gb|KR583353.1|	Aphis spiraecola voucher BIOUG07903-F11 cytochrome oxidase subunit 1 (COI) gene, partial cds; mitochondrial	39.4	39.4	1	0.004	0.95	KR583353.1	294	....A................	314
741Select seq gb|KR583342.1|	Macrosiphum sp. BOLD-2016 voucher BIOUG08862-H01 cytochrome oxidase subunit 1 (COI) gene, partial cds; mitochondrial	39.4	39.4	1	0.004	0.95	KR583342.1	238	....A................	258
742Select seq gb|KR583279.1|	Macrosiphum sp. BOLD-2016 voucher BIOUG08791-G11 cytochrome oxidase subunit 1 (COI) gene, partial cds; mitochondrial	39.4	39.4	1	0.004	0.95	KR583279.1	300	....A................	320
743Select seq gb|KR583267.1|	Metcalfa pruinosa voucher BIOUG09281-C05 cytochrome oxidase subunit 1 (COI) gene, partial cds; mitochondrial	39.4	39.4	1	0.004	0.95	KR583267.1	225	....T................	245
744Select seq gb|KR583250.1|	Cavariella konoi voucher BIOUG05961-A07 cytochrome oxidase subunit 1 (COI) gene, partial cds; mitochondrial	39.4	39.4	1	0.004	0.95	KR583250.1	313	....A................	333
745Select seq gb|KR583249.1|	Lipaphis pseudobrassicae voucher BIOUG08044-G12 cytochrome oxidase subunit 1 (COI) gene, partial cds; mitochondrial	39.4	39.4	1	0.004	0.95	KR583249.1	313	....A................	333
746Select seq gb|KR583230.1|	Metopolophium dirhodum voucher BIOUG16088-E05 cytochrome oxidase subunit 1 (COI) gene, partial cds; mitochondrial	39.4	39.4	1	0.004	0.95	KR583230.1	297	....A................	317
747Select seq gb|KR583229.1|	Chaitophorus sp. BOLD-2016 voucher BIOUG16125-C03 cytochrome oxidase subunit 1 (COI) gene, partial cds; mitochondrial	39.4	39.4	1	0.004	0.95	KR583229.1	282	....A................	302
748Select seq gb|KR583210.1|	Calaphidinae sp. BOLD-2016 voucher BIOUG03852-H04 cytochrome oxidase subunit 1 (COI) gene, partial cds; mitochondrial	39.4	39.4	1	0.004	0.95	KR583210.1	313	....A................	333
749Select seq gb|KR583178.1|	Aphidinae sp. BOLD-2016 voucher BIOUG06659-E05 cytochrome oxidase subunit 1 (COI) gene, partial cds; mitochondrial	39.4	39.4	1	0.004	0.95	KR583178.1	303	....A................	323
750Select seq gb|KR583134.1|	Macrosiphum sp. BOLD-2016 voucher BIOUG09179-A08 cytochrome oxidase subunit 1 (COI) gene, partial cds; mitochondrial	39.4	39.4	1	0.004	0.95	KR583134.1	313	....A................	333
751Select seq gb|KR583060.1|	Macrosiphum sp. BOLD-2016 voucher BIOUG09175-D10 cytochrome oxidase subunit 1 (COI) gene, partial cds; mitochondrial	39.4	39.4	1	0.004	0.95	KR583060.1	305	....A................	325
752Select seq gb|KR583034.1|	Hyperomyzus lactucae voucher BIOUG04646-B04 cytochrome oxidase subunit 1 (COI) gene, partial cds; mitochondrial	39.4	39.4	1	0.004	0.95	KR583034.1	313	....A................	333
753Select seq gb|KR583033.1|	Macrosiphum sp. BOLD-2016 voucher 10BBCHEM-0342 cytochrome oxidase subunit 1 (COI) gene, partial cds; mitochondrial	39.4	39.4	1	0.004	0.95	KR583033.1	313	....A................	333
754Select seq gb|KR583024.1|	Metopolophium dirhodum voucher BIOUG16130-A12 cytochrome oxidase subunit 1 (COI) gene, partial cds; mitochondrial	39.4	39.4	1	0.004	0.95	KR583024.1	312	....A................	332
755Select seq gb|KR583023.1|	Uroleucon sp. BOLD-2016 voucher BIOUG04874-B07 cytochrome oxidase subunit 1 (COI) gene, partial cds; mitochondrial	39.4	39.4	1	0.004	0.95	KR583023.1	303	....A................	323
756Select seq gb|KR583006.1|	Calaphidinae sp. BOLD-2016 voucher BIOUG03360-A11 cytochrome oxidase subunit 1 (COI) gene, partial cds; mitochondrial	39.4	39.4	1	0.004	0.95	KR583006.1	313	....A................	333
757Select seq gb|KR582993.1|	Cinara mariana voucher BIOUG06850-A06 cytochrome oxidase subunit 1 (COI) gene, partial cds; mitochondrial	39.4	39.4	1	0.004	0.95	KR582993.1	304	....A................	324
758Select seq gb|KR582966.1|	Uroleucon sp. BOLD-2016 voucher BIOUG08187-G06 cytochrome oxidase subunit 1 (COI) gene, partial cds; mitochondrial	39.4	39.4	1	0.004	0.95	KR582966.1	303	....A................	323
759Select seq gb|KR582964.1|	Utamphorophora humboldti voucher BIOUG08639-E02 cytochrome oxidase subunit 1 (COI) gene, partial cds; mitochondrial	39.4	39.4	1	0.004	0.95	KR582964.1	313	....A................	333
760Select seq gb|KR582949.1|	Macrosiphum sp. BOLD-2016 voucher BIOUG09179-B11 cytochrome oxidase subunit 1 (COI) gene, partial cds; mitochondrial	39.4	39.4	1	0.004	0.95	KR582949.1	313	....A................	333
761Select seq gb|KR582934.1|	Macrosiphum sp. BOLD-2016 voucher BIOUG09174-D12 cytochrome oxidase subunit 1 (COI) gene, partial cds; mitochondrial	39.4	39.4	1	0.004	0.95	KR582934.1	293	....A................	313
762Select seq gb|KR582926.1|	Gypsoaphis sp. BOLD-2016 voucher BIOUG04874-G08 cytochrome oxidase subunit 1 (COI) gene, partial cds; mitochondrial	39.4	39.4	1	0.004	0.95	KR582926.1	313	....A................	333
763Select seq gb|KR582917.1|	Calaphidinae sp. BOLD-2016 voucher BIOUG03541-G10 cytochrome oxidase subunit 1 (COI) gene, partial cds; mitochondrial	39.4	39.4	1	0.004	0.95	KR582917.1	313	....A................	333
764Select seq gb|KR582845.1|	Macrosiphum sp. BOLD-2016 voucher BIOUG06640-C09 cytochrome oxidase subunit 1 (COI) gene, partial cds; mitochondrial	39.4	39.4	1	0.004	0.95	KR582845.1	305	....A................	325
765Select seq gb|KR582844.1|	Brachycaudus helichrysi voucher BIOUG16063-E04 cytochrome oxidase subunit 1 (COI) gene, partial cds; mitochondrial	39.4	39.4	1	0.004	0.95	KR582844.1	312	....A................	332
766Select seq gb|KR582841.1|	Macrosiphum sp. BOLD-2016 voucher BIOUG09179-A05 cytochrome oxidase subunit 1 (COI) gene, partial cds; mitochondrial	39.4	39.4	1	0.004	0.95	KR582841.1	305	....A................	325
767Select seq gb|KR582839.1|	Macrosiphum sp. BOLD-2016 voucher BIOUG09174-B03 cytochrome oxidase subunit 1 (COI) gene, partial cds; mitochondrial	39.4	39.4	1	0.004	0.95	KR582839.1	292	....A................	312
768Select seq gb|KR582811.1|	Macrosiphum sp. BOLD-2016 voucher BIOUG09180-E12 cytochrome oxidase subunit 1 (COI) gene, partial cds; mitochondrial	39.4	39.4	1	0.004	0.95	KR582811.1	298	....A................	318
769Select seq gb|KR582807.1|	Macrosiphum sp. BOLD-2016 voucher BIOUG06688-C08 cytochrome oxidase subunit 1 (COI) gene, partial cds; mitochondrial	39.4	39.4	1	0.004	0.95	KR582807.1	313	....A................	333
770Select seq gb|KR582757.1|	Uroleucon sp. BOLD-2016 voucher BIOUG03360-H03 cytochrome oxidase subunit 1 (COI) gene, partial cds; mitochondrial	39.4	39.4	1	0.004	0.95	KR582757.1	313	....A................	333
771Select seq gb|KR582736.1|	Abstrusomyzus phloxae voucher BIOUG07213-B06 cytochrome oxidase subunit 1 (COI) gene, partial cds; mitochondrial	39.4	39.4	1	0.004	0.95	KR582736.1	313	....A................	333
772Select seq gb|KR582648.1|	Nearctaphis clydesmithi voucher BIOUG16129-C06 cytochrome oxidase subunit 1 (COI) gene, partial cds; mitochondrial	39.4	39.4	1	0.004	0.95	KR582648.1	303	....A................	323
773Select seq gb|KR582560.1|	Cavariella konoi voucher BIOUG06709-F09 cytochrome oxidase subunit 1 (COI) gene, partial cds; mitochondrial	39.4	39.4	1	0.004	0.95	KR582560.1	313	....A................	333
774Select seq gb|KR582558.1|	Lipaphis pseudobrassicae voucher BIOUG08044-G10 cytochrome oxidase subunit 1 (COI) gene, partial cds; mitochondrial	39.4	39.4	1	0.004	0.95	KR582558.1	313	....A................	333
775Select seq gb|KR582544.1|	Macrosiphum sp. BOLD-2016 voucher BIOUG09300-G02 cytochrome oxidase subunit 1 (COI) gene, partial cds; mitochondrial	39.4	39.4	1	0.004	0.95	KR582544.1	313	....A................	333
776Select seq gb|KR582542.1|	Macrosiphum sp. BOLD-2016 voucher BIOUG16018-A12 cytochrome oxidase subunit 1 (COI) gene, partial cds; mitochondrial	39.4	39.4	1	0.004	0.95	KR582542.1	270	....A................	290
777Select seq gb|KR582512.1|	Macrosiphum sp. BOLD-2016 voucher BIOUG09237-D02 cytochrome oxidase subunit 1 (COI) gene, partial cds; mitochondrial	39.4	39.4	1	0.004	0.95	KR582512.1	305	....A................	325
778Select seq gb|KR582468.1|	Macrosiphum sp. BOLD-2016 voucher BIOUG06358-D07 cytochrome oxidase subunit 1 (COI) gene, partial cds; mitochondrial	39.4	39.4	1	0.004	0.95	KR582468.1	305	....A................	325
779Select seq gb|KR582449.1|	Illinoia sp. BOLD-2016 voucher BIOUG09178-H04 cytochrome oxidase subunit 1 (COI) gene, partial cds; mitochondrial	39.4	39.4	1	0.004	0.95	KR582449.1	303	....A................	323
780Select seq gb|KR582435.1|	Illinoia sp. BOLD-2016 voucher BIOUG08388-H03 cytochrome oxidase subunit 1 (COI) gene, partial cds; mitochondrial	39.4	39.4	1	0.004	0.95	KR582435.1	303	....A................	323
781Select seq gb|KR582428.1|	Monellia sp. BOLD-2016 voucher BIOUG07002-C03 cytochrome oxidase subunit 1 (COI) gene, partial cds; mitochondrial	39.4	39.4	1	0.004	0.95	KR582428.1	305	....A................	325
782Select seq gb|KR582416.1|	Macrosiphum sp. BOLD-2016 voucher BIOUG09173-A10 cytochrome oxidase subunit 1 (COI) gene, partial cds; mitochondrial	39.4	39.4	1	0.004	0.95	KR582416.1	313	....A................	333
783Select seq gb|KR582405.1|	Calaphidinae sp. BOLD-2016 voucher BIOUG03541-A03 cytochrome oxidase subunit 1 (COI) gene, partial cds; mitochondrial	39.4	39.4	1	0.004	0.95	KR582405.1	313	....A................	333
784Select seq gb|KR582381.1|	Metopolophium dirhodum voucher BIOUG06666-A03 cytochrome oxidase subunit 1 (COI) gene, partial cds; mitochondrial	39.4	39.4	1	0.004	0.95	KR582381.1	313	....A................	333
785Select seq gb|KR582361.1|	Myzus cerasi voucher BIOUG16050-E04 cytochrome oxidase subunit 1 (COI) gene, partial cds; mitochondrial	39.4	39.4	1	0.004	0.95	KR582361.1	300	....A................	320
786Select seq gb|KR582320.1|	Uroleucon sp. BOLD-2016 voucher BIOUG05152-H11 cytochrome oxidase subunit 1 (COI) gene, partial cds; mitochondrial	39.4	39.4	1	0.004	0.95	KR582320.1	313	....A................	333
787Select seq gb|KR582308.1|	Aphis pentstemonicola voucher BIOUG03700-D12 cytochrome oxidase subunit 1 (COI) gene, partial cds; mitochondrial	39.4	39.4	1	0.004	0.95	KR582308.1	313	....A................	333
788Select seq gb|KR582295.1|	Aphidinae sp. BOLD-2016 voucher BIOUG17682-D12 cytochrome oxidase subunit 1 (COI) gene, partial cds; mitochondrial	39.4	39.4	1	0.004	0.95	KR582295.1	312	....A................	332
789Select seq gb|KR582192.1|	Tetraneura ulmi voucher BIOUG08671-H06 cytochrome oxidase subunit 1 (COI) gene, partial cds; mitochondrial	39.4	39.4	1	0.004	0.95	KR582192.1	305	....A................	325
790Select seq gb|KR582178.1|	Aulacorthum solani voucher 10PHMAL-1944 cytochrome oxidase subunit 1 (COI) gene, partial cds; mitochondrial	39.4	39.4	1	0.004	0.95	KR582178.1	313	....A................	333
791Select seq gb|KR582140.1|	Calaphidinae sp. BOLD-2016 voucher BIOUG04097-B08 cytochrome oxidase subunit 1 (COI) gene, partial cds; mitochondrial	39.4	39.4	1	0.004	0.95	KR582140.1	313	....A................	333
792Select seq gb|KR582087.1|	Metopolophium sp. BOLD-2016 voucher BIOUG06252-B03 cytochrome oxidase subunit 1 (COI) gene, partial cds; mitochondrial	39.4	39.4	1	0.004	0.95	KR582087.1	305	....A................	325
793Select seq gb|KR582040.1|	Thripsaphis cyperi voucher CHU06-APH-112 cytochrome oxidase subunit 1 (COI) gene, partial cds; mitochondrial	39.4	39.4	1	0.004	0.95	KR582040.1	300	....A................	320
794Select seq gb|KR582010.1|	Rhodobium sp. BOLD-2016 voucher 10BBCHEM-0130 cytochrome oxidase subunit 1 (COI) gene, partial cds; mitochondrial	39.4	39.4	1	0.004	0.95	KR582010.1	313	....A................	333
795Select seq gb|KR581999.1|	Macrosiphum sp. BOLD-2016 voucher BIOUG09179-F03 cytochrome oxidase subunit 1 (COI) gene, partial cds; mitochondrial	39.4	39.4	1	0.004	0.95	KR581999.1	293	....A................	313
796Select seq gb|KR581971.1|	Macrosiphum sp. BOLD-2016 voucher BIOUG06358-C12 cytochrome oxidase subunit 1 (COI) gene, partial cds; mitochondrial	39.4	39.4	1	0.004	0.95	KR581971.1	305	....A................	325
797Select seq gb|KR581959.1|	Hyperomyzus picridis voucher BIOUG16008-A04 cytochrome oxidase subunit 1 (COI) gene, partial cds; mitochondrial	39.4	39.4	1	0.004	0.95	KR581959.1	300	....A................	320
798Select seq gb|KR581947.1|	Macrosiphum sp. BOLD-2016 voucher BIOUG05834-G11 cytochrome oxidase subunit 1 (COI) gene, partial cds; mitochondrial	39.4	39.4	1	0.004	0.95	KR581947.1	303	....A................	323
799Select seq gb|KR581939.1|	Calaphidinae sp. BOLD-2016 voucher BIOUG04197-B09 cytochrome oxidase subunit 1 (COI) gene, partial cds; mitochondrial	39.4	39.4	1	0.004	0.95	KR581939.1	313	....A................	333
800Select seq gb|KR581863.1|	Metopolophium dirhodum voucher BIOUG16029-A08 cytochrome oxidase subunit 1 (COI) gene, partial cds; mitochondrial	39.4	39.4	1	0.004	0.95	KR581863.1	313	....A................	333
801Select seq gb|KR581852.1|	Ceruraphis sp. BOLD-2016 voucher BIOUG07935-A08 cytochrome oxidase subunit 1 (COI) gene, partial cds; mitochondrial	39.4	39.4	1	0.004	0.95	KR581852.1	303	....A................	323
802Select seq gb|KR581845.1|	Aulacorthum solani voucher BIOUG08044-H02 cytochrome oxidase subunit 1 (COI) gene, partial cds; mitochondrial	39.4	39.4	1	0.004	0.95	KR581845.1	312	....A................	332
803Select seq gb|KR581824.1|	Macrosiphum sp. BOLD-2016 voucher BIOUG06251-C12 cytochrome oxidase subunit 1 (COI) gene, partial cds; mitochondrial	39.4	39.4	1	0.004	0.95	KR581824.1	304	....A................	324
804Select seq gb|KR581818.1|	Calaphidinae sp. BOLD-2016 voucher BIOUG03360-D10 cytochrome oxidase subunit 1 (COI) gene, partial cds; mitochondrial	39.4	39.4	1	0.004	0.95	KR581818.1	313	....A................	333
805Select seq gb|KR581805.1|	Uroleucon sp. BOLD-2016 voucher BIOUG09177-B04 cytochrome oxidase subunit 1 (COI) gene, partial cds; mitochondrial	39.4	39.4	1	0.004	0.95	KR581805.1	305	....A................	325
806Select seq gb|KR581786.1|	Macrosiphum sp. BOLD-2016 voucher BIOUG16058-C11 cytochrome oxidase subunit 1 (COI) gene, partial cds; mitochondrial	39.4	39.4	1	0.004	0.95	KR581786.1	312	....A................	332
807Select seq gb|KR581782.1|	Macrosiphum sp. BOLD-2016 voucher 10BBCHEM-0587 cytochrome oxidase subunit 1 (COI) gene, partial cds; mitochondrial	39.4	39.4	1	0.004	0.95	KR581782.1	313	....A................	333
808Select seq gb|KR581763.1|	Hyperomyzus lactucae voucher BIOUG16129-C08 cytochrome oxidase subunit 1 (COI) gene, partial cds; mitochondrial	39.4	39.4	1	0.004	0.95	KR581763.1	303	....A................	323
809Select seq gb|KR581756.1|	Aphidinae sp. BOLD-2016 voucher BIOUG05473-H04 cytochrome oxidase subunit 1 (COI) gene, partial cds; mitochondrial	39.4	39.4	1	0.004	0.95	KR581756.1	305	....A................	325
810Select seq gb|KR581717.1|	Myzus cerasi voucher BIOUG13926-A09 cytochrome oxidase subunit 1 (COI) gene, partial cds; mitochondrial	39.4	39.4	1	0.004	0.95	KR581717.1	303	....A................	323
811Select seq gb|KR581710.1|	Metcalfa pruinosa voucher BIOUG08805-D08 cytochrome oxidase subunit 1 (COI) gene, partial cds; mitochondrial	39.4	39.4	1	0.004	0.95	KR581710.1	263	....T................	283
812Select seq gb|KR581706.1|	Illinoia sp. BOLD-2016 voucher BIOUG16561-F09 cytochrome oxidase subunit 1 (COI) gene, partial cds; mitochondrial	39.4	39.4	1	0.004	0.95	KR581706.1	291	....A................	311
813Select seq gb|KR581655.1|	Uroleucon luteolum voucher BIOUG07939-H06 cytochrome oxidase subunit 1 (COI) gene, partial cds; mitochondrial	39.4	39.4	1	0.004	0.95	KR581655.1	313	....A................	333
814Select seq gb|KR581651.1|	Cinara laricifex voucher BIOUG16018-E05 cytochrome oxidase subunit 1 (COI) gene, partial cds; mitochondrial	39.4	39.4	1	0.004	0.95	KR581651.1	288	....A................	308
815Select seq gb|KR581627.1|	Calaphidinae sp. BOLD-2016 voucher BIOUG04225-E01 cytochrome oxidase subunit 1 (COI) gene, partial cds; mitochondrial	39.4	39.4	1	0.004	0.95	KR581627.1	313	....A................	333
816Select seq gb|KR581622.1|	Calaphidinae sp. BOLD-2016 voucher BIOUG04197-B08 cytochrome oxidase subunit 1 (COI) gene, partial cds; mitochondrial	39.4	39.4	1	0.004	0.95	KR581622.1	313	....A................	333
817Select seq gb|KR581540.1|	Mindarus obliquus voucher BIOUG13563-A03 cytochrome oxidase subunit 1 (COI) gene, partial cds; mitochondrial	39.4	39.4	1	0.004	0.95	KR581540.1	300	....A................	320
818Select seq gb|KR581507.1|	Macrosiphum sp. BOLD-2016 voucher BIOUG06252-D11 cytochrome oxidase subunit 1 (COI) gene, partial cds; mitochondrial	39.4	39.4	1	0.004	0.95	KR581507.1	305	....A................	325
819Select seq gb|KR581506.1|	Uroleucon sp. BOLD-2016 voucher BIOUG09175-E12 cytochrome oxidase subunit 1 (COI) gene, partial cds; mitochondrial	39.4	39.4	1	0.004	0.95	KR581506.1	305	....A................	325
820Select seq gb|KR581469.1|	Macrosiphum sp. BOLD-2016 voucher BIOUG05116-H03 cytochrome oxidase subunit 1 (COI) gene, partial cds; mitochondrial	39.4	39.4	1	0.004	0.95	KR581469.1	312	....A................	332
821Select seq gb|KR581453.1|	Aphis rubicola voucher BIOUG07212-D01 cytochrome oxidase subunit 1 (COI) gene, partial cds; mitochondrial	39.4	39.4	1	0.004	0.95	KR581453.1	313	....A................	333
822Select seq gb|KR581447.1|	Macrosiphum sp. BOLD-2016 voucher BIOUG05111-A07 cytochrome oxidase subunit 1 (COI) gene, partial cds; mitochondrial	39.4	39.4	1	0.004	0.95	KR581447.1	273	....A................	293
823Select seq gb|KR581428.1|	Hyperomyzus lactucae voucher BIOUG16129-A09 cytochrome oxidase subunit 1 (COI) gene, partial cds; mitochondrial	39.4	39.4	1	0.004	0.95	KR581428.1	312	....A................	332
824Select seq gb|KR581425.1|	Macrosiphum sp. BOLD-2016 voucher BIOUG09300-D04 cytochrome oxidase subunit 1 (COI) gene, partial cds; mitochondrial	39.4	39.4	1	0.004	0.95	KR581425.1	313	....A................	333
825Select seq gb|KR581401.1|	Aphis varians voucher BIOUG06391-F02 cytochrome oxidase subunit 1 (COI) gene, partial cds; mitochondrial	39.4	39.4	1	0.004	0.95	KR581401.1	305	....A................	325
826Select seq gb|KR581398.1|	Calaphidinae sp. BOLD-2016 voucher BIOUG08425-E10 cytochrome oxidase subunit 1 (COI) gene, partial cds; mitochondrial	39.4	39.4	1	0.004	0.95	KR581398.1	312	....A................	332
827Select seq gb|KR581374.1|	Rhopalosiphum nymphaeae voucher BIOUG16048-G09 cytochrome oxidase subunit 1 (COI) gene, partial cds; mitochondrial	39.4	39.4	1	0.004	0.95	KR581374.1	303	....A................	323
828Select seq gb|KR581371.1|	Macrosiphum sp. BOLD-2016 voucher BIOUG06251-F03 cytochrome oxidase subunit 1 (COI) gene, partial cds; mitochondrial	39.4	39.4	1	0.004	0.95	KR581371.1	304	....A................	324
829Select seq gb|KR581351.1|	Calaphidinae sp. BOLD-2016 voucher BIOUG04197-B04 cytochrome oxidase subunit 1 (COI) gene, partial cds; mitochondrial	39.4	39.4	1	0.004	0.95	KR581351.1	313	....A................	333
830Select seq gb|KR581346.1|	Aphis glycines voucher BIOUG16025-D09 cytochrome oxidase subunit 1 (COI) gene, partial cds; mitochondrial	39.4	39.4	1	0.004	0.95	KR581346.1	312	....A................	332
831Select seq gb|KR581323.1|	Macrosiphum sp. BOLD-2016 voucher BIOUG13141-B11 cytochrome oxidase subunit 1 (COI) gene, partial cds; mitochondrial	39.4	39.4	1	0.004	0.95	KR581323.1	313	....A................	333
832Select seq gb|KR581257.1|	Hyadaphis passerinii voucher BIOUG08040-C12 cytochrome oxidase subunit 1 (COI) gene, partial cds; mitochondrial	39.4	39.4	1	0.004	0.95	KR581257.1	313	....A................	333
833Select seq gb|KR581180.1|	Aphis glycines voucher BIOUG09681-H11 cytochrome oxidase subunit 1 (COI) gene, partial cds; mitochondrial	39.4	39.4	1	0.004	0.95	KR581180.1	293	....A................	313
834Select seq gb|KR581151.1|	Macrosiphum sp. BOLD-2016 voucher BIOUG09177-C12 cytochrome oxidase subunit 1 (COI) gene, partial cds; mitochondrial	39.4	39.4	1	0.004	0.95	KR581151.1	305	....A................	325
835Select seq gb|KR581078.1|	Cavariella konoi voucher BIOUG05961-C10 cytochrome oxidase subunit 1 (COI) gene, partial cds; mitochondrial	39.4	39.4	1	0.004	0.95	KR581078.1	313	....A................	333
836Select seq gb|KR581035.1|	Uroleucon sp. BOLD-2016 voucher BIOUG16086-H07 cytochrome oxidase subunit 1 (COI) gene, partial cds; mitochondrial	39.4	39.4	1	0.004	0.95	KR581035.1	303	....A................	323
837Select seq gb|KR581030.1|	Brachycaudus sp. BOLD-2016 voucher BIOUG11283-E06 cytochrome oxidase subunit 1 (COI) gene, partial cds; mitochondrial	39.4	39.4	1	0.004	0.95	KR581030.1	314	....A................	334
838Select seq gb|KR581014.1|	Diuraphis sp. BOLD-2016 voucher BIOUG07292-H11 cytochrome oxidase subunit 1 (COI) gene, partial cds; mitochondrial	39.4	39.4	1	0.004	0.95	KR581014.1	313	....A................	333
839Select seq gb|KR581005.1|	Macrosiphum sp. BOLD-2016 voucher BIOUG08884-B09 cytochrome oxidase subunit 1 (COI) gene, partial cds; mitochondrial	39.4	39.4	1	0.004	0.95	KR581005.1	313	....A................	333
840Select seq gb|KR580995.1|	Brachycaudus helichrysi voucher BIOUG16063-D07 cytochrome oxidase subunit 1 (COI) gene, partial cds; mitochondrial	39.4	39.4	1	0.004	0.95	KR580995.1	312	....A................	332
841Select seq gb|KR580953.1|	Uroleucon sp. BOLD-2016 voucher BIOUG04653-B05 cytochrome oxidase subunit 1 (COI) gene, partial cds; mitochondrial	39.4	39.4	1	0.004	0.95	KR580953.1	285	....A................	305
842Select seq gb|KR580948.1|	Macrosiphum pseudocoryli voucher BIOUG05111-D09 cytochrome oxidase subunit 1 (COI) gene, partial cds; mitochondrial	39.4	39.4	1	0.004	0.95	KR580948.1	30	....A................	50
843Select seq gb|KR580852.1|	Ovatus crataegarius voucher BIOUG16133-G08 cytochrome oxidase subunit 1 (COI) gene, partial cds; mitochondrial	39.4	39.4	1	0.004	0.95	KR580852.1	312	....A................	332
844Select seq gb|KR580845.1|	Macrosiphum sp. BOLD-2016 voucher BIOUG09173-G12 cytochrome oxidase subunit 1 (COI) gene, partial cds; mitochondrial	39.4	39.4	1	0.004	0.95	KR580845.1	304	....A................	324
845Select seq gb|KR580839.1|	Cinara hottesi voucher BIOUG07525-C02 cytochrome oxidase subunit 1 (COI) gene, partial cds; mitochondrial	39.4	39.4	1	0.004	0.95	KR580839.1	305	....A................	325
846Select seq gb|KR580814.1|	Hyperomyzus lactucae voucher BIOUG16161-B06 cytochrome oxidase subunit 1 (COI) gene, partial cds; mitochondrial	39.4	39.4	1	0.004	0.95	KR580814.1	309	....A................	329
847Select seq gb|KR580793.1|	Aphis varians voucher BIOUG06391-E12 cytochrome oxidase subunit 1 (COI) gene, partial cds; mitochondrial	39.4	39.4	1	0.004	0.95	KR580793.1	299	....A................	319
848Select seq gb|KR580744.1|	Macrosiphum sp. BOLD-2016 voucher BIOUG09173-C10 cytochrome oxidase subunit 1 (COI) gene, partial cds; mitochondrial	39.4	39.4	1	0.004	0.95	KR580744.1	305	....A................	325
849Select seq gb|KR580741.1|	Aphis pentstemonicola voucher BIOUG06939-B08 cytochrome oxidase subunit 1 (COI) gene, partial cds; mitochondrial	39.4	39.4	1	0.004	0.95	KR580741.1	305	....A................	325
850Select seq gb|KR580724.1|	Aulacorthum solani voucher BIOUG08005-D04 cytochrome oxidase subunit 1 (COI) gene, partial cds; mitochondrial	39.4	39.4	1	0.004	0.95	KR580724.1	303	....A................	323
851Select seq gb|KR580697.1|	Aphis varians voucher BIOUG06391-F01 cytochrome oxidase subunit 1 (COI) gene, partial cds; mitochondrial	39.4	39.4	1	0.004	0.95	KR580697.1	304	....A................	324
852Select seq gb|KR580694.1|	Macrosiphum sp. BOLD-2016 voucher BIOUG04874-H09 cytochrome oxidase subunit 1 (COI) gene, partial cds; mitochondrial	39.4	39.4	1	0.004	0.95	KR580694.1	282	....A................	302
853Select seq gb|KR580687.1|	Calaphidinae sp. BOLD-2016 voucher BIOUG04196-H10 cytochrome oxidase subunit 1 (COI) gene, partial cds; mitochondrial	39.4	39.4	1	0.004	0.95	KR580687.1	313	....A................	333
854Select seq gb|KR580685.1|	Metopolophium dirhodum voucher BIOUG16129-B05 cytochrome oxidase subunit 1 (COI) gene, partial cds; mitochondrial	39.4	39.4	1	0.004	0.95	KR580685.1	297	....A................	317
855Select seq gb|KR580646.1|	Uroleucon sp. BOLD-2016 voucher BIOUG03541-A05 cytochrome oxidase subunit 1 (COI) gene, partial cds; mitochondrial	39.4	39.4	1	0.004	0.95	KR580646.1	313	....A................	333
856Select seq gb|KR580641.1|	Aphis varians voucher BIOUG06391-E01 cytochrome oxidase subunit 1 (COI) gene, partial cds; mitochondrial	39.4	39.4	1	0.004	0.95	KR580641.1	305	....A................	325
857Select seq gb|KR580618.1|	Calaphidinae sp. BOLD-2016 voucher BIOUG04196-E04 cytochrome oxidase subunit 1 (COI) gene, partial cds; mitochondrial	39.4	39.4	1	0.004	0.95	KR580618.1	313	....A................	333
858Select seq gb|KR580615.1|	Cavariella konoi voucher BIOUG05152-H09 cytochrome oxidase subunit 1 (COI) gene, partial cds; mitochondrial	39.4	39.4	1	0.004	0.95	KR580615.1	313	....A................	333
859Select seq gb|KT753300.1|	Illinoia liriodendri isolate ILLCO cytochrome oxidase subunit 1 (COI) gene, partial cds; mitochondrial	39.4	39.4	1	0.004	0.95	KT753300.1	272	....A................	292
860Select seq gb|KU570450.1|	Atheroides serrulatus cytochrome c oxidase subunit I (COI) gene, partial cds; mitochondrial	39.4	39.4	1	0.004	0.95	KU570450.1	273	....A................	293
861Select seq gb|KU570448.1|	Drepanosiphum platanoidis cytochrome c oxidase subunit I (COI) gene, partial cds; mitochondrial	39.4	39.4	1	0.004	0.95	KU570448.1	273	....A................	293
862Select seq gb|KU570447.1|	Drepanaphis acerifoliae cytochrome c oxidase subunit I (COI) gene, partial cds; mitochondrial	39.4	39.4	1	0.004	0.95	KU570447.1	273	....A................	293
863Select seq gb|KU570446.1|	Yamatocallis tokyoensis cytochrome c oxidase subunit I (COI) gene, partial cds; mitochondrial	39.4	39.4	1	0.004	0.95	KU570446.1	273	....A................	293
864Select seq gb|KU570442.1|	Periphyllus testudinaceus cytochrome c oxidase subunit I (COI) gene, partial cds; mitochondrial	39.4	39.4	1	0.004	0.95	KU570442.1	273	....A................	293
865Select seq gb|KU570441.1|	Atheroides hirtellus cytochrome c oxidase subunit I (COI) gene, partial cds; mitochondrial	39.4	39.4	1	0.004	0.95	KU570441.1	273	....A................	293
866Select seq gb|KU570438.1|	Laingia psammae cytochrome c oxidase subunit I (COI) gene, partial cds; mitochondrial	39.4	39.4	1	0.004	0.95	KU570438.1	273	....A................	293
867Select seq gb|KU570436.1|	Drepanosiphum oregonense cytochrome c oxidase subunit I (COI) gene, partial cds; mitochondrial	39.4	39.4	1	0.004	0.95	KU570436.1	273	....A................	293
868Select seq gb|KU570435.1|	Drepanosiphum aceris cytochrome c oxidase subunit I (COI) gene, partial cds; mitochondrial	39.4	39.4	1	0.004	0.95	KU570435.1	273	....A................	293
869Select seq gb|KU570433.1|	Chaitophorus tremulae cytochrome c oxidase subunit I (COI) gene, partial cds; mitochondrial	39.4	39.4	1	0.004	0.95	KU570433.1	273	....A................	293
870Select seq gb|KU570431.1|	Chaitophorus salicti cytochrome c oxidase subunit I (COI) gene, partial cds; mitochondrial	39.4	39.4	1	0.004	0.95	KU570431.1	273	....A................	293
871Select seq gb|KU570428.1|	Chaitophorus truncatus cytochrome c oxidase subunit I (COI) gene, partial cds; mitochondrial	39.4	39.4	1	0.004	0.95	KU570428.1	273	....A................	293
872Select seq emb|LT600417.1|	Schizolachnus obscurus mitochondrial partial COI gene for cytochrome oxidase subunit 1, strain 14ES	39.4	39.4	1	0.004	0.95	LT600417.1	313	....A................	333
873Select seq emb|LT600415.1|	Schizolachnus obscurus mitochondrial partial COI gene for cytochrome oxidase subunit 1, strain 10FR	39.4	39.4	1	0.004	0.95	LT600415.1	262	....A................	282
874Select seq emb|LT600414.1|	Schizolachnus obscurus mitochondrial partial COI gene for cytochrome oxidase subunit 1, strain 5FR	39.4	39.4	1	0.004	0.95	LT600414.1	262	....A................	282
875Select seq emb|LT600413.1|	Schizolachnus obscurus mitochondrial partial COI gene for cytochrome oxidase subunit 1, strain 2FR	39.4	39.4	1	0.004	0.95	LT600413.1	263	....A................	283
876Select seq emb|LT600412.1|	Cinara cf. guadarramae 6WIEN mitochondrial partial COI gene for cytochrome oxidase subunit 1, strain 6WIEN	39.4	39.4	1	0.004	0.95	LT600412.1	282	....A................	302
877Select seq emb|LT600411.1|	Cinara brauni mitochondrial partial COI gene for cytochrome oxidase subunit 1, strain 5WIEN	39.4	39.4	1	0.004	0.95	LT600411.1	281	....A................	301
878Select seq emb|LT600410.1|	Cinara pruinosa mitochondrial partial COI gene for cytochrome oxidase subunit 1, strain 8FR	39.4	39.4	1	0.004	0.95	LT600410.1	264	....A................	284
879Select seq emb|LT600409.1|	Cinara cf. pinea 11FR mitochondrial partial COI gene for cytochrome oxidase subunit 1, strain 11FR	39.4	39.4	1	0.004	0.95	LT600409.1	260	....A................	280
880Select seq emb|LT600403.1|	Eulachnus mediterraneus mitochondrial partial COI gene for cytochrome oxidase subunit 1, strain 2ES	39.4	39.4	1	0.004	0.95	LT600403.1	277	....A................	297
881Select seq emb|LT600394.1|	Lachnus roboris mitochondrial partial COI gene for cytochrome oxidase subunit 1, strain 9ES	39.4	39.4	1	0.004	0.95	LT600394.1	300	....A................	320
882Select seq emb|LT600393.1|	Lachnus roboris mitochondrial partial COI gene for cytochrome oxidase subunit 1, strain 8ES	39.4	39.4	1	0.004	0.95	LT600393.1	313	....A................	333
883Select seq gb|KR580551.1|	Calaphidinae sp. BOLD-2016 voucher BIOUG03716-A05 cytochrome oxidase subunit 1 (COI) gene, partial cds; mitochondrial	39.4	39.4	1	0.004	0.95	KR580551.1	313	....A................	333
884Select seq gb|KR580486.1|	Uroleucon sp. BOLD-2016 voucher BIOUG06884-E10 cytochrome oxidase subunit 1 (COI) gene, partial cds; mitochondrial	39.4	39.4	1	0.004	0.95	KR580486.1	304	....A................	324
885Select seq gb|KR580408.1|	Uroleucon sp. BOLD-2016 voucher BIOUG09180-B11 cytochrome oxidase subunit 1 (COI) gene, partial cds; mitochondrial	39.4	39.4	1	0.004	0.95	KR580408.1	300	....A................	320
886Select seq gb|KR580383.1|	Calaphidinae sp. BOLD-2016 voucher BIOUG03696-C02 cytochrome oxidase subunit 1 (COI) gene, partial cds; mitochondrial	39.4	39.4	1	0.004	0.95	KR580383.1	215	....A................	235
887Select seq gb|KR580378.1|	Calaphidinae sp. BOLD-2016 voucher BIOUG03541-D11 cytochrome oxidase subunit 1 (COI) gene, partial cds; mitochondrial	39.4	39.4	1	0.004	0.95	KR580378.1	313	....A................	333
888Select seq gb|KR580369.1|	Aphis pomi voucher BIOUG08425-E02 cytochrome oxidase subunit 1 (COI) gene, partial cds; mitochondrial	39.4	39.4	1	0.004	0.95	KR580369.1	312	....A................	332
889Select seq gb|KR580354.1|	Chaitophorus sp. BOLD-2016 voucher BIOUG16152-B02 cytochrome oxidase subunit 1 (COI) gene, partial cds; mitochondrial	39.4	39.4	1	0.004	0.95	KR580354.1	303	....A................	323
890Select seq gb|KR580334.1|	Monellia sp. BOLD-2016 voucher BIOUG03852-A05 cytochrome oxidase subunit 1 (COI) gene, partial cds; mitochondrial	39.4	39.4	1	0.004	0.95	KR580334.1	313	....A................	333
891Select seq gb|KR580313.1|	Chaitophorus sp. BOLD-2016 voucher BIOUG16152-B11 cytochrome oxidase subunit 1 (COI) gene, partial cds; mitochondrial	39.4	39.4	1	0.004	0.95	KR580313.1	303	....A................	323
892Select seq gb|KR580297.1|	Macrosiphum sp. BOLD-2016 voucher BIOUG08464-B08 cytochrome oxidase subunit 1 (COI) gene, partial cds; mitochondrial	39.4	39.4	1	0.004	0.95	KR580297.1	303	....A................	323
893Select seq gb|KR580286.1|	Callipterinella sp. BOLD-2016 voucher BIOUG16099-B01 cytochrome oxidase subunit 1 (COI) gene, partial cds; mitochondrial	39.4	39.4	1	0.004	0.95	KR580286.1	312	....A................	332
894Select seq gb|KR580283.1|	Cinara hottesi voucher BIOUG07527-B02 cytochrome oxidase subunit 1 (COI) gene, partial cds; mitochondrial	39.4	39.4	1	0.004	0.95	KR580283.1	305	....A................	325
895Select seq gb|KR580280.1|	Aphidinae sp. BOLD-2016 voucher BIOUG14006-D01 cytochrome oxidase subunit 1 (COI) gene, partial cds; mitochondrial	39.4	39.4	1	0.004	0.95	KR580280.1	292	....A................	312
896Select seq gb|KR580279.1|	Calaphidinae sp. BOLD-2016 voucher BIOUG03716-G02 cytochrome oxidase subunit 1 (COI) gene, partial cds; mitochondrial	39.4	39.4	1	0.004	0.95	KR580279.1	313	....A................	333
897Select seq gb|KR580267.1|	Ceruraphis sp. BOLD-2016 voucher BIOUG16129-B10 cytochrome oxidase subunit 1 (COI) gene, partial cds; mitochondrial	39.4	39.4	1	0.004	0.95	KR580267.1	312	....A................	332
898Select seq gb|KR580261.1|	Macrosiphum sp. BOLD-2016 voucher BIOUG05956-G09 cytochrome oxidase subunit 1 (COI) gene, partial cds; mitochondrial	39.4	39.4	1	0.004	0.95	KR580261.1	304	....A................	324
899Select seq gb|KR580260.1|	Macrosiphum sp. BOLD-2016 voucher BIOUG06358-B12 cytochrome oxidase subunit 1 (COI) gene, partial cds; mitochondrial	39.4	39.4	1	0.004	0.95	KR580260.1	305	....A................	325
900Select seq gb|KR580257.1|	Aphis caliginosa voucher BIOUG00999-B11 cytochrome oxidase subunit 1 (COI) gene, partial cds; mitochondrial	39.4	39.4	1	0.004	0.95	KR580257.1	313	....A................	333
901Select seq gb|KR580223.1|	Aphidinae sp. BOLD:AAD9153 voucher BIOUG08041-B11 cytochrome oxidase subunit 1 (COI) gene, partial cds; mitochondrial	39.4	39.4	1	0.004	0.95	KR580223.1	312	....A................	332
902Select seq gb|KR580205.1|	Tetraneura sp. BOLD:AAG3894 voucher BIOUG12376-B02 cytochrome oxidase subunit 1 (COI) gene, partial cds; mitochondrial	39.4	39.4	1	0.004	0.95	KR580205.1	312	....A................	332
903Select seq gb|KR580193.1|	Metopolophium sp. BOLD:AAE7796 voucher BIOUG16018-E01 cytochrome oxidase subunit 1 (COI) gene, partial cds; mitochondrial	39.4	39.4	1	0.004	0.95	KR580193.1	303	....A................	323
904Select seq gb|KR580192.1|	Uroleucon sp. BOLD-2016 voucher BIOUG07900-F12 cytochrome oxidase subunit 1 (COI) gene, partial cds; mitochondrial	39.4	39.4	1	0.004	0.95	KR580192.1	312	....A................	332
905Select seq gb|KR580177.1|	Aphis sp. BOLD:AAC7705 voucher BIOUG13381-A09 cytochrome oxidase subunit 1 (COI) gene, partial cds; mitochondrial	39.4	39.4	1	0.004	0.95	KR580177.1	312	....A................	332
906Select seq gb|KR580175.1|	Aphidinae sp. BOLD-2016 voucher BIOUG04874-C12 cytochrome oxidase subunit 1 (COI) gene, partial cds; mitochondrial	39.4	39.4	1	0.004	0.95	KR580175.1	313	....A................	333
907Select seq gb|KR580170.1|	Calaphidinae sp. BOLD-2016 voucher BIOUG04196-E06 cytochrome oxidase subunit 1 (COI) gene, partial cds; mitochondrial	39.4	39.4	1	0.004	0.95	KR580170.1	313	....A................	333
908Select seq gb|KR580137.1|	Hyperomyzus sp. BOLD:AAB8566 voucher BIOUG16161-E03 cytochrome oxidase subunit 1 (COI) gene, partial cds; mitochondrial	39.4	39.4	1	0.004	0.95	KR580137.1	312	....A................	332
909Select seq gb|KR580135.1|	Aphis sp. BOLD:AAC7705 voucher BIOUG05821-G11 cytochrome oxidase subunit 1 (COI) gene, partial cds; mitochondrial	39.4	39.4	1	0.004	0.95	KR580135.1	305	....A................	325
910Select seq gb|KR580037.1|	Aphis glycines voucher BIOUG16071-E10 cytochrome oxidase subunit 1 (COI) gene, partial cds; mitochondrial	39.4	39.4	1	0.004	0.95	KR580037.1	287	....A................	307
911Select seq gb|KR580025.1|	Nasonovia sp. BOLD-2016 voucher BIOUG08709-D04 cytochrome oxidase subunit 1 (COI) gene, partial cds; mitochondrial	39.4	39.4	1	0.004	0.95	KR580025.1	303	....A................	323
912Select seq gb|KR579992.1|	Hyperomyzus picridis voucher BIOUG16008-D12 cytochrome oxidase subunit 1 (COI) gene, partial cds; mitochondrial	39.4	39.4	1	0.004	0.95	KR579992.1	300	....A................	320
913Select seq gb|KR579991.1|	Aphidinae sp. BOLD-2016 voucher BIOUG18091-F05 cytochrome oxidase subunit 1 (COI) gene, partial cds; mitochondrial	39.4	39.4	1	0.004	0.95	KR579991.1	303	....A................	323
914Select seq gb|KR579981.1|	Calaphidinae sp. BOLD-2016 voucher BIOUG04359-H06 cytochrome oxidase subunit 1 (COI) gene, partial cds; mitochondrial	39.4	39.4	1	0.004	0.95	KR579981.1	313	....A................	333
915Select seq gb|KR579980.1|	Macrosiphum sp. BOLD-2016 voucher BIOUG06251-E06 cytochrome oxidase subunit 1 (COI) gene, partial cds; mitochondrial	39.4	39.4	1	0.004	0.95	KR579980.1	305	....A................	325
916Select seq gb|KR579971.1|	Calaphidinae sp. BOLD-2016 voucher BIOUG03672-G02 cytochrome oxidase subunit 1 (COI) gene, partial cds; mitochondrial	39.4	39.4	1	0.004	0.95	KR579971.1	313	....A................	333
917Select seq gb|KR579933.1|	Calaphidinae sp. BOLD-2016 voucher BIOUG03852-G09 cytochrome oxidase subunit 1 (COI) gene, partial cds; mitochondrial	39.4	39.4	1	0.004	0.95	KR579933.1	313	....A................	333
918Select seq gb|KR579906.1|	Cinara sp. BOLD:AAI3997 voucher BIOUG07130-H03 cytochrome oxidase subunit 1 (COI) gene, partial cds; mitochondrial	39.4	39.4	1	0.004	0.95	KR579906.1	312	....A................	332
919Select seq gb|KR579887.1|	Illinoia sp. BOLD-2016 voucher BIOUG09173-G02 cytochrome oxidase subunit 1 (COI) gene, partial cds; mitochondrial	39.4	39.4	1	0.004	0.95	KR579887.1	304	....A................	324
920Select seq gb|KR579863.1|	Calaphidinae sp. BOLD-2016 voucher BIOUG08440-H09 cytochrome oxidase subunit 1 (COI) gene, partial cds; mitochondrial	39.4	39.4	1	0.004	0.95	KR579863.1	303	....A................	323
921Select seq gb|KR579845.1|	Uroleucon sp. BOLD-2016 voucher BIOUG03541-A01 cytochrome oxidase subunit 1 (COI) gene, partial cds; mitochondrial	39.4	39.4	1	0.004	0.95	KR579845.1	313	....A................	333
922Select seq gb|KR579815.1|	Aphidinae sp. BOLD-2016 voucher BIOUG14005-C04 cytochrome oxidase subunit 1 (COI) gene, partial cds; mitochondrial	39.4	39.4	1	0.004	0.95	KR579815.1	292	....A................	312
923Select seq gb|KR579801.1|	Illinoia sp. BOLD-2016 voucher BIOUG06011-H07 cytochrome oxidase subunit 1 (COI) gene, partial cds; mitochondrial	39.4	39.4	1	0.004	0.95	KR579801.1	305	....A................	325
924Select seq gb|KR579776.1|	Calaphidinae sp. BOLD-2016 voucher BIOUG03055-H10 cytochrome oxidase subunit 1 (COI) gene, partial cds; mitochondrial	39.4	39.4	1	0.004	0.95	KR579776.1	313	....A................	333
925Select seq gb|KR579690.1|	Macrosiphum sp. BOLD-2016 voucher BIOUG08403-C11 cytochrome oxidase subunit 1 (COI) gene, partial cds; mitochondrial	39.4	39.4	1	0.004	0.95	KR579690.1	313	....A................	333
926Select seq gb|KR579676.1|	Aphidinae sp. BOLD-2016 voucher BIOUG13985-F09 cytochrome oxidase subunit 1 (COI) gene, partial cds; mitochondrial	39.4	39.4	1	0.004	0.95	KR579676.1	303	....A................	323
927Select seq gb|KR579672.1|	Rhopalosiphum nymphaeae voucher BIOUG16096-C12 cytochrome oxidase subunit 1 (COI) gene, partial cds; mitochondrial	39.4	39.4	1	0.004	0.95	KR579672.1	312	....A................	332
928Select seq gb|KR579629.1|	Illinoia sp. BOLD-2016 voucher BIOUG09174-E12 cytochrome oxidase subunit 1 (COI) gene, partial cds; mitochondrial	39.4	39.4	1	0.004	0.95	KR579629.1	305	....A................	325
929Select seq gb|KR579622.1|	Illinoia sp. BOLD-2016 voucher BIOUG07601-C09 cytochrome oxidase subunit 1 (COI) gene, partial cds; mitochondrial	39.4	39.4	1	0.004	0.95	KR579622.1	313	....A................	333
930Select seq gb|KR579615.1|	Cinara hottesi voucher BIOUG07159-G03 cytochrome oxidase subunit 1 (COI) gene, partial cds; mitochondrial	39.4	39.4	1	0.004	0.95	KR579615.1	313	....A................	333
931Select seq gb|KR579600.1|	Macrosiphum sp. BOLD-2016 voucher BIOUG09173-E04 cytochrome oxidase subunit 1 (COI) gene, partial cds; mitochondrial	39.4	39.4	1	0.004	0.95	KR579600.1	245	....A................	265
932Select seq gb|KR579588.1|	Macrosiphum sp. BOLD-2016 voucher BIOUG04445-B03 cytochrome oxidase subunit 1 (COI) gene, partial cds; mitochondrial	39.4	39.4	1	0.004	0.95	KR579588.1	300	....A................	320
933Select seq gb|KR579571.1|	Uroleucon sp. BOLD:AAF8501 voucher BIOUG07937-F11 cytochrome oxidase subunit 1 (COI) gene, partial cds; mitochondrial	39.4	39.4	1	0.004	0.95	KR579571.1	303	....A................	323
934Select seq gb|KR579561.1|	Eriosoma sp. BOLD-2016 voucher 08BBHEM-395 cytochrome oxidase subunit 1 (COI) gene, partial cds; mitochondrial	39.4	39.4	1	0.004	0.95	KR579561.1	313	....A................	333
935Select seq gb|KR579555.1|	Aphididae sp. BOLD:AAG5616 voucher BIOUG13411-C01 cytochrome oxidase subunit 1 (COI) gene, partial cds; mitochondrial	39.4	39.4	1	0.004	0.95	KR579555.1	303	....A................	323
936Select seq gb|KR579546.1|	Acuticauda solidaginifoliae voucher BIOUG01139-E09 cytochrome oxidase subunit 1 (COI) gene, partial cds; mitochondrial	39.4	39.4	1	0.004	0.95	KR579546.1	313	....A................	333
937Select seq gb|KR579520.1|	Hyperomyzus pallidus voucher BIOUG16125-A09 cytochrome oxidase subunit 1 (COI) gene, partial cds; mitochondrial	39.4	39.4	1	0.004	0.95	KR579520.1	303	....A................	323
938Select seq gb|KR579492.1|	Aphididae sp. BOLD:ACE3923 voucher BIOUG09681-F09 cytochrome oxidase subunit 1 (COI) gene, partial cds; mitochondrial	39.4	39.4	1	0.004	0.95	KR579492.1	290	....A................	310
939Select seq gb|KR579489.1|	Aphididae sp. BOLD:AAB1787 voucher BIOUG13276-E02 cytochrome oxidase subunit 1 (COI) gene, partial cds; mitochondrial	39.4	39.4	1	0.004	0.95	KR579489.1	303	....A................	323
940Select seq gb|KR579485.1|	Aulacorthum sp. BOLD:AAB2572 voucher BIOUG05793-B06 cytochrome oxidase subunit 1 (COI) gene, partial cds; mitochondrial	39.4	39.4	1	0.004	0.95	KR579485.1	313	....A................	333
941Select seq gb|KR579454.1|	Aphidinae sp. BOLD-2016 voucher BIOUG06901-C01 cytochrome oxidase subunit 1 (COI) gene, partial cds; mitochondrial	39.4	39.4	1	0.004	0.95	KR579454.1	313	....A................	333
942Select seq gb|KR579446.1|	Cinara sp. BOLD:AAI3997 voucher BIOUG06422-C06 cytochrome oxidase subunit 1 (COI) gene, partial cds; mitochondrial	39.4	39.4	1	0.004	0.95	KR579446.1	313	....A................	333
943Select seq gb|KR579429.1|	Calaphidinae sp. BOLD-2016 voucher BIOUG04225-H07 cytochrome oxidase subunit 1 (COI) gene, partial cds; mitochondrial	39.4	39.4	1	0.004	0.95	KR579429.1	313	....A................	333
944Select seq gb|KR579419.1|	Metopolophium sp. BOLD-2016 voucher 10BBCHEM-0780 cytochrome oxidase subunit 1 (COI) gene, partial cds; mitochondrial	39.4	39.4	1	0.004	0.95	KR579419.1	313	....A................	333
945Select seq gb|KR579393.1|	Macrosiphum sp. BOLD-2016 voucher BIOUG03941-B06 cytochrome oxidase subunit 1 (COI) gene, partial cds; mitochondrial	39.4	39.4	1	0.004	0.95	KR579393.1	313	....A................	333
946Select seq gb|KR579356.1|	Calaphidinae sp. BOLD-2016 voucher BIOUG03696-D11 cytochrome oxidase subunit 1 (COI) gene, partial cds; mitochondrial	39.4	39.4	1	0.004	0.95	KR579356.1	313	....A................	333
947Select seq gb|KR579350.1|	Calaphidinae sp. BOLD-2016 voucher BIOUG03360-E03 cytochrome oxidase subunit 1 (COI) gene, partial cds; mitochondrial	39.4	39.4	1	0.004	0.95	KR579350.1	313	....A................	333
948Select seq gb|KR579339.1|	Callipterinella calliptera voucher BIOUG07800-H04 cytochrome oxidase subunit 1 (COI) gene, partial cds; mitochondrial	39.4	39.4	1	0.004	0.95	KR579339.1	314	....A................	334
949Select seq gb|KR579335.1|	Capitophorus sp. BOLD-2016 voucher BIOUG08567-G12 cytochrome oxidase subunit 1 (COI) gene, partial cds; mitochondrial	39.4	39.4	1	0.004	0.95	KR579335.1	312	....A................	332
950Select seq gb|KR579331.1|	Macrosiphum sp. BOLD-2016 voucher BIOUG06688-F05 cytochrome oxidase subunit 1 (COI) gene, partial cds; mitochondrial	39.4	39.4	1	0.004	0.95	KR579331.1	313	....A................	333
951Select seq gb|KR579313.1|	Metopolophium sp. BOLD:AAE7796 voucher BIOUG09177-C08 cytochrome oxidase subunit 1 (COI) gene, partial cds; mitochondrial	39.4	39.4	1	0.004	0.95	KR579313.1	283	....A................	303
952Select seq gb|KR579298.1|	Aphidinae sp. BOLD-2016 voucher BIOUG13898-D07 cytochrome oxidase subunit 1 (COI) gene, partial cds; mitochondrial	39.4	39.4	1	0.004	0.95	KR579298.1	313	....A................	333
953Select seq gb|KR579210.1|	Protaphis middletonii voucher BIOUG07811-C12 cytochrome oxidase subunit 1 (COI) gene, partial cds; mitochondrial	39.4	39.4	1	0.004	0.95	KR579210.1	314	....A................	334
954Select seq gb|KR579182.1|	Diuraphis sp. BOLD-2016 voucher BIOUG09237-E02 cytochrome oxidase subunit 1 (COI) gene, partial cds; mitochondrial	39.4	39.4	1	0.004	0.95	KR579182.1	304	....A................	324
955Select seq gb|KR579103.1|	Calaphidinae sp. BOLD-2016 voucher BIOUG04196-G01 cytochrome oxidase subunit 1 (COI) gene, partial cds; mitochondrial	39.4	39.4	1	0.004	0.95	KR579103.1	313	....A................	333
956Select seq gb|KR579095.1|	Callipterinella sp. BOLD-2016 voucher BIOUG16131-D08 cytochrome oxidase subunit 1 (COI) gene, partial cds; mitochondrial	39.4	39.4	1	0.004	0.95	KR579095.1	312	....A................	332
957Select seq gb|KR579091.1|	Macrosiphum sp. BOLD-2016 voucher BIOUG09175-A03 cytochrome oxidase subunit 1 (COI) gene, partial cds; mitochondrial	39.4	39.4	1	0.004	0.95	KR579091.1	305	....A................	325
958Select seq gb|KR579081.1|	Macrosiphum pseudocoryli voucher BIOUG05116-F04 cytochrome oxidase subunit 1 (COI) gene, partial cds; mitochondrial	39.4	39.4	1	0.004	0.95	KR579081.1	93	....A................	113
959Select seq gb|KR579064.1|	Illinoia sp. BOLD-2016 voucher BIOUG05116-F03 cytochrome oxidase subunit 1 (COI) gene, partial cds; mitochondrial	39.4	39.4	1	0.004	0.95	KR579064.1	282	....A................	302
960Select seq gb|KR579014.1|	Aphididae sp. BOLD:ACF4664 voucher BIOUG08671-D02 cytochrome oxidase subunit 1 (COI) gene, partial cds; mitochondrial	39.4	39.4	1	0.004	0.95	KR579014.1	304	....A................	324
961Select seq gb|KR579007.1|	Takecallis arundinariae voucher BIOUG16048-G12 cytochrome oxidase subunit 1 (COI) gene, partial cds; mitochondrial	39.4	39.4	1	0.004	0.95	KR579007.1	303	....A................	323
962Select seq gb|KR578936.1|	Schizolachnus sp. BOLD:AAE3796 voucher BIOUG16134-H09 cytochrome oxidase subunit 1 (COI) gene, partial cds; mitochondrial	39.4	39.4	1	0.004	0.95	KR578936.1	313	....A................	333
963Select seq gb|KR578866.1|	Illinoia sp. BOLD-2016 voucher BIOUG04745-E03 cytochrome oxidase subunit 1 (COI) gene, partial cds; mitochondrial	39.4	39.4	1	0.004	0.95	KR578866.1	300	....A................	320
964Select seq gb|KR578857.1|	Metopolophium sp. BOLD-2016 voucher 10BBCHEM-0531 cytochrome oxidase subunit 1 (COI) gene, partial cds; mitochondrial	39.4	39.4	1	0.004	0.95	KR578857.1	313	....A................	333
965Select seq gb|KR578854.1|	Callipterinella sp. BOLD-2016 voucher BIOUG08657-B12 cytochrome oxidase subunit 1 (COI) gene, partial cds; mitochondrial	39.4	39.4	1	0.004	0.95	KR578854.1	313	....A................	333
966Select seq gb|KR578850.1|	Aphis spiraecola voucher BIOUG07158-E05 cytochrome oxidase subunit 1 (COI) gene, partial cds; mitochondrial	39.4	39.4	1	0.004	0.95	KR578850.1	313	....A................	333
967Select seq gb|KR578841.1|	Aphididae sp. BOLD:AAC4637 voucher BIOUG13485-A08 cytochrome oxidase subunit 1 (COI) gene, partial cds; mitochondrial	39.4	39.4	1	0.004	0.95	KR578841.1	303	....A................	323
968Select seq gb|KR578840.1|	Macrosiphum sp. BOLD-2016 voucher BIOUG05111-G09 cytochrome oxidase subunit 1 (COI) gene, partial cds; mitochondrial	39.4	39.4	1	0.004	0.95	KR578840.1	309	....A................	329
969Select seq gb|KR578830.1|	Calaphidinae sp. BOLD-2016 voucher BIOUG03928-G10 cytochrome oxidase subunit 1 (COI) gene, partial cds; mitochondrial	39.4	39.4	1	0.004	0.95	KR578830.1	313	....A................	333
970Select seq gb|KR578818.1|	Macrosiphum sp. BOLD-2016 voucher BIOUG06637-A02 cytochrome oxidase subunit 1 (COI) gene, partial cds; mitochondrial	39.4	39.4	1	0.004	0.95	KR578818.1	313	....A................	333
971Select seq gb|KR578809.1|	Uroleucon sp. BOLD-2016 voucher BIOUG09175-E01 cytochrome oxidase subunit 1 (COI) gene, partial cds; mitochondrial	39.4	39.4	1	0.004	0.95	KR578809.1	304	....A................	324
972Select seq gb|KR578803.1|	Illinoia sp. BOLD-2016 voucher BIOUG07100-D02 cytochrome oxidase subunit 1 (COI) gene, partial cds; mitochondrial	39.4	39.4	1	0.004	0.95	KR578803.1	313	....A................	333
973Select seq gb|KR578792.1|	Macrosiphum sp. BOLD-2016 voucher BIOUG05956-F08 cytochrome oxidase subunit 1 (COI) gene, partial cds; mitochondrial	39.4	39.4	1	0.004	0.95	KR578792.1	305	....A................	325
974Select seq gb|KR578772.1|	Calaphidinae sp. BOLD-2016 voucher BIOUG03696-C12 cytochrome oxidase subunit 1 (COI) gene, partial cds; mitochondrial	39.4	39.4	1	0.004	0.95	KR578772.1	313	....A................	333
975Select seq gb|KR578767.1|	Macrosiphum sp. BOLD-2016 voucher BIOUG05445-C11 cytochrome oxidase subunit 1 (COI) gene, partial cds; mitochondrial	39.4	39.4	1	0.004	0.95	KR578767.1	312	....A................	332
976Select seq gb|KR578761.1|	Aulacorthum sp. BOLD:AAB2572 voucher BIOUG07966-D08 cytochrome oxidase subunit 1 (COI) gene, partial cds; mitochondrial	39.4	39.4	1	0.004	0.95	KR578761.1	303	....A................	323
977Select seq gb|KR578741.1|	Braggia sp. BOLD-2016 voucher BIOUG08284-A07 cytochrome oxidase subunit 1 (COI) gene, partial cds; mitochondrial	39.4	39.4	1	0.004	0.95	KR578741.1	303	....A................	323
978Select seq gb|KR578719.1|	Aphididae sp. BOLD:AAG3894 voucher BIOUG13985-B08 cytochrome oxidase subunit 1 (COI) gene, partial cds; mitochondrial	39.4	39.4	1	0.004	0.95	KR578719.1	303	....A................	323
979Select seq gb|KR578708.1|	Macrosiphum sp. BOLD-2016 voucher BIOUG09173-H02 cytochrome oxidase subunit 1 (COI) gene, partial cds; mitochondrial	39.4	39.4	1	0.004	0.95	KR578708.1	313	....A................	333
980Select seq gb|KR578700.1|	Rhopalosiphum cerasifoliae voucher BIOUG16130-G12 cytochrome oxidase subunit 1 (COI) gene, partial cds; mitochondrial	39.4	39.4	1	0.004	0.95	KR578700.1	312	....A................	332
981Select seq gb|KR578693.1|	Aphidinae sp. BOLD-2016 voucher BIOUG14005-E12 cytochrome oxidase subunit 1 (COI) gene, partial cds; mitochondrial	39.4	39.4	1	0.004	0.95	KR578693.1	292	....A................	312
982Select seq gb|KR578659.1|	Calaphidinae sp. BOLD-2016 voucher BIOUG03360-A02 cytochrome oxidase subunit 1 (COI) gene, partial cds; mitochondrial	39.4	39.4	1	0.004	0.95	KR578659.1	313	....A................	333
983Select seq gb|KR578654.1|	Metopolophium sp. BOLD:AAE7796 voucher BIOUG16130-C11 cytochrome oxidase subunit 1 (COI) gene, partial cds; mitochondrial	39.4	39.4	1	0.004	0.95	KR578654.1	243	....A................	263
984Select seq gb|KR578650.1|	Metopolophium sp. BOLD-2016 voucher BIOUG06155-E05 cytochrome oxidase subunit 1 (COI) gene, partial cds; mitochondrial	39.4	39.4	1	0.004	0.95	KR578650.1	304	....A................	324
985Select seq gb|KR578640.1|	Macrosiphum sp. BOLD-2016 voucher BIOUG15929-C12 cytochrome oxidase subunit 1 (COI) gene, partial cds; mitochondrial	39.4	39.4	1	0.004	0.95	KR578640.1	303	....A................	323
986Select seq gb|KR578630.1|	Aphididae sp. BOLD:ACE5126 voucher BIOUG13563-A10 cytochrome oxidase subunit 1 (COI) gene, partial cds; mitochondrial	39.4	39.4	1	0.004	0.95	KR578630.1	303	....A................	323
987Select seq gb|KR578618.1|	Uroleucon sp. BOLD-2016 voucher BIOUG05100-A03 cytochrome oxidase subunit 1 (COI) gene, partial cds; mitochondrial	39.4	39.4	1	0.004	0.95	KR578618.1	312	....A................	332
988Select seq gb|KR578586.1|	Macrosiphum sp. BOLD-2016 voucher BIOUG09179-H10 cytochrome oxidase subunit 1 (COI) gene, partial cds; mitochondrial	39.4	39.4	1	0.004	0.95	KR578586.1	306	....A................	326
989Select seq gb|KR578565.1|	Calaphidinae sp. BOLD-2016 voucher BIOUG03672-B12 cytochrome oxidase subunit 1 (COI) gene, partial cds; mitochondrial	39.4	39.4	1	0.004	0.95	KR578565.1	243	....A................	263
990Select seq gb|KR578555.1|	Macrosiphoniella sp. BOLD-2016 voucher BIOUG07791-H02 cytochrome oxidase subunit 1 (COI) gene, partial cds; mitochondrial	39.4	39.4	1	0.004	0.95	KR578555.1	313	....A................	333
991Select seq gb|KR578544.1|	Nearctaphis sp. BOLD-2016 voucher BIOUG03700-E09 cytochrome oxidase subunit 1 (COI) gene, partial cds; mitochondrial	39.4	39.4	1	0.004	0.95	KR578544.1	313	....A................	333
992Select seq gb|KR578541.1|	Cavariella sp. BOLD:AAC6115 voucher BIOUG06314-B02 cytochrome oxidase subunit 1 (COI) gene, partial cds; mitochondrial	39.4	39.4	1	0.004	0.95	KR578541.1	305	....A................	325
993Select seq gb|KR578537.1|	Aphidinae sp. BOLD:AAB1787 voucher BIOUG08112-D11 cytochrome oxidase subunit 1 (COI) gene, partial cds; mitochondrial	39.4	39.4	1	0.004	0.95	KR578537.1	303	....A................	323
994Select seq gb|KR578519.1|	Macrosiphum sp. BOLD-2016 voucher BIOUG09178-A11 cytochrome oxidase subunit 1 (COI) gene, partial cds; mitochondrial	39.4	39.4	1	0.004	0.95	KR578519.1	303	....A................	323
995Select seq gb|KR578470.1|	Flatidae sp. BOLD:AAG4399 voucher BIOUG10779-E12 cytochrome oxidase subunit 1 (COI) gene, partial cds; mitochondrial	39.4	39.4	1	0.004	0.95	KR578470.1	313	....T................	333
996Select seq gb|KR578436.1|	Calaphidinae sp. BOLD-2016 voucher BIOUG04196-B11 cytochrome oxidase subunit 1 (COI) gene, partial cds; mitochondrial	39.4	39.4	1	0.004	0.95	KR578436.1	313	....A................	333
997Select seq gb|KR578432.1|	Macrosiphum sp. BOLD-2016 voucher BIOUG16021-A02 cytochrome oxidase subunit 1 (COI) gene, partial cds; mitochondrial	39.4	39.4	1	0.004	0.95	KR578432.1	312	....A................	332
998Select seq gb|KR578431.1|	Aphis sp. BOLD:AAH2855 voucher BIOUG03222-B05 cytochrome oxidase subunit 1 (COI) gene, partial cds; mitochondrial	39.4	39.4	1	0.004	0.95	KR578431.1	313	....A................	333
999Select seq gb|KR578427.1|	Calaphidinae sp. BOLD-2016 voucher BIOUG04097-A05 cytochrome oxidase subunit 1 (COI) gene, partial cds; mitochondrial	39.4	39.4	1	0.004	0.95	KR578427.1	313	....A................	333
1000Select seq gb|KR578389.1|	Ceruraphis sp. BOLD-2016 voucher BIOUG13373-F03 cytochrome oxidase subunit 1 (COI) gene, partial cds; mitochondrial	39.4	39.4	1	0.004	0.95	KR578389.1	312	....A................	332
1001Select seq gb|KR578367.1|	Macrosiphum sp. BOLD-2016 voucher BIOUG09180-F12 cytochrome oxidase subunit 1 (COI) gene, partial cds; mitochondrial	39.4	39.4	1	0.004	0.95	KR578367.1	301	....A................	321
1002Select seq gb|KR578362.1|	Macrosiphum sp. BOLD-2016 voucher BIOUG09179-B07 cytochrome oxidase subunit 1 (COI) gene, partial cds; mitochondrial	39.4	39.4	1	0.004	0.95	KR578362.1	305	....A................	325
1003Select seq gb|KR578351.1|	Macrosiphum sp. BOLD-2016 voucher BIOUG05090-E11 cytochrome oxidase subunit 1 (COI) gene, partial cds; mitochondrial	39.4	39.4	1	0.004	0.95	KR578351.1	309	....A................	329
1004Select seq gb|KR578311.1|	Cinara sp. BOLD:AAI3997 voucher BIOUG09028-D07 cytochrome oxidase subunit 1 (COI) gene, partial cds; mitochondrial	39.4	39.4	1	0.004	0.95	KR578311.1	305	....A................	325
1005Select seq gb|KR578303.1|	Aphidinae sp. BOLD:AAB1787 voucher BIOUG03140-G08 cytochrome oxidase subunit 1 (COI) gene, partial cds; mitochondrial	39.4	39.4	1	0.004	0.95	KR578303.1	313	....A................	333
1006Select seq gb|KR578283.1|	Aphidinae sp. BOLD-2016 voucher BIOUG05793-G06 cytochrome oxidase subunit 1 (COI) gene, partial cds; mitochondrial	39.4	39.4	1	0.004	0.95	KR578283.1	313	....A................	333
1007Select seq gb|KR578274.1|	Aphidinae sp. BOLD-2016 voucher BIOUG07321-C05 cytochrome oxidase subunit 1 (COI) gene, partial cds; mitochondrial	39.4	39.4	1	0.004	0.95	KR578274.1	304	....A................	324
1008Select seq gb|KR578254.1|	Nasonovia sp. BOLD:AAB9332 voucher BIOUG08493-B12 cytochrome oxidase subunit 1 (COI) gene, partial cds; mitochondrial	39.4	39.4	1	0.004	0.95	KR578254.1	312	....A................	332
1009Select seq gb|KR578250.1|	Aphidinae sp. BOLD-2016 voucher BIOUG16087-B04 cytochrome oxidase subunit 1 (COI) gene, partial cds; mitochondrial	39.4	39.4	1	0.004	0.95	KR578250.1	288	....A................	308
1010Select seq gb|KR578244.1|	Macrosiphum sp. BOLD-2016 voucher BIOUG07937-F05 cytochrome oxidase subunit 1 (COI) gene, partial cds; mitochondrial	39.4	39.4	1	0.004	0.95	KR578244.1	312	....A................	332
1011Select seq gb|KR578187.1|	Aphis sp. BOLD:AAB7937 voucher BIOUG04445-C07 cytochrome oxidase subunit 1 (COI) gene, partial cds; mitochondrial	39.4	39.4	1	0.004	0.95	KR578187.1	306	....A................	326
1012Select seq gb|KR578175.1|	Calaphidinae sp. BOLD-2016 voucher BIOUG03716-F11 cytochrome oxidase subunit 1 (COI) gene, partial cds; mitochondrial	39.4	39.4	1	0.004	0.95	KR578175.1	313	....A................	333
1013Select seq gb|KR578052.1|	Aphididae sp. BOLD:ACE5126 voucher BIOUG13141-B05 cytochrome oxidase subunit 1 (COI) gene, partial cds; mitochondrial	39.4	39.4	1	0.004	0.95	KR578052.1	313	....A................	333
1014Select seq gb|KR578028.1|	Rhopalomyzus sp. BOLD-2016 voucher BIOUG16063-C06 cytochrome oxidase subunit 1 (COI) gene, partial cds; mitochondrial	39.4	39.4	1	0.004	0.95	KR578028.1	303	....A................	323
1015Select seq gb|KR577997.1|	Macrosiphum sp. BOLD-2016 voucher BIOUG09178-B12 cytochrome oxidase subunit 1 (COI) gene, partial cds; mitochondrial	39.4	39.4	1	0.004	0.95	KR577997.1	300	....A................	320
1016Select seq gb|KR577940.1|	Calaphidinae sp. BOLD-2016 voucher BIOUG03852-F07 cytochrome oxidase subunit 1 (COI) gene, partial cds; mitochondrial	39.4	39.4	1	0.004	0.95	KR577940.1	313	....A................	333
1017Select seq gb|KR577928.1|	Calaphidinae sp. BOLD-2016 voucher BIOUG03360-C10 cytochrome oxidase subunit 1 (COI) gene, partial cds; mitochondrial	39.4	39.4	1	0.004	0.95	KR577928.1	271	....A................	291
1018Select seq gb|KR577921.1|	Amphorophora sp. BOLD:AAF4380 voucher BIOUG06351-F04 cytochrome oxidase subunit 1 (COI) gene, partial cds; mitochondrial	39.4	39.4	1	0.004	0.95	KR577921.1	313	....A................	333
1019Select seq gb|KR577906.1|	Macrosiphum sp. BOLD-2016 voucher BIOUG09175-B08 cytochrome oxidase subunit 1 (COI) gene, partial cds; mitochondrial	39.4	39.4	1	0.004	0.95	KR577906.1	313	....A................	333
1020Select seq gb|KR577896.1|	Hyperomyzus pallidus voucher BIOUG16129-C03 cytochrome oxidase subunit 1 (COI) gene, partial cds; mitochondrial	39.4	39.4	1	0.004	0.95	KR577896.1	303	....A................	323
1021Select seq gb|KR577884.1|	Aphididae sp. BOLD:AAD6640 voucher BIOUG13754-G09 cytochrome oxidase subunit 1 (COI) gene, partial cds; mitochondrial	39.4	39.4	1	0.004	0.95	KR577884.1	309	....A................	329
1022Select seq gb|KR577881.1|	Macrosiphum sp. BOLD-2016 voucher BIOUG03160-F09 cytochrome oxidase subunit 1 (COI) gene, partial cds; mitochondrial	39.4	39.4	1	0.004	0.95	KR577881.1	313	....A................	333
1023Select seq gb|KR577870.1|	Aphis sp. BOLD:AAC7705 voucher BIOUG07800-G06 cytochrome oxidase subunit 1 (COI) gene, partial cds; mitochondrial	39.4	39.4	1	0.004	0.95	KR577870.1	314	....A................	334
1024Select seq gb|KR577845.1|	Tamalia sp. BOLD-2016 voucher BIOUG03026-H09 cytochrome oxidase subunit 1 (COI) gene, partial cds; mitochondrial	39.4	39.4	1	0.004	0.95	KR577845.1	313	....A................	333
1025Select seq gb|KR577842.1|	Aulacorthum sp. BOLD:AAB2572 voucher BIOUG07966-E01 cytochrome oxidase subunit 1 (COI) gene, partial cds; mitochondrial	39.4	39.4	1	0.004	0.95	KR577842.1	309	....A................	329
1026Select seq gb|KR577840.1|	Calaphidinae sp. BOLD-2016 voucher BIOUG03541-B04 cytochrome oxidase subunit 1 (COI) gene, partial cds; mitochondrial	39.4	39.4	1	0.004	0.95	KR577840.1	313	....A................	333
1027Select seq gb|KR577838.1|	Illinoia sp. BOLD-2016 voucher BIOUG09623-A07 cytochrome oxidase subunit 1 (COI) gene, partial cds; mitochondrial	39.4	39.4	1	0.004	0.95	KR577838.1	300	....A................	320
1028Select seq gb|KR577834.1|	Uroleucon sp. BOLD-2016 voucher BIOUG07530-H10 cytochrome oxidase subunit 1 (COI) gene, partial cds; mitochondrial	39.4	39.4	1	0.004	0.95	KR577834.1	300	....A................	320
1029Select seq gb|KR577830.1|	Tamalia sp. BOLD-2016 voucher BIOUG03971-B07 cytochrome oxidase subunit 1 (COI) gene, partial cds; mitochondrial	39.4	39.4	1	0.004	0.95	KR577830.1	313	....A................	333
1030Select seq gb|KR577762.1|	Macrosiphum sp. BOLD-2016 voucher BIOUG05100-A12 cytochrome oxidase subunit 1 (COI) gene, partial cds; mitochondrial	39.4	39.4	1	0.004	0.95	KR577762.1	303	....A................	323
1031Select seq gb|KR577761.1|	Macrosiphum sp. BOLD-2016 voucher BIOUG09179-D10 cytochrome oxidase subunit 1 (COI) gene, partial cds; mitochondrial	39.4	39.4	1	0.004	0.95	KR577761.1	313	....A................	333
1032Select seq gb|KR577749.1|	Aphididae sp. BOLD:AAD6293 voucher BIOUG13544-B12 cytochrome oxidase subunit 1 (COI) gene, partial cds; mitochondrial	39.4	39.4	1	0.004	0.95	KR577749.1	298	....A................	318
1033Select seq gb|KR577733.1|	Gypsoaphis sp. BOLD-2016 voucher BIOUG04874-A09 cytochrome oxidase subunit 1 (COI) gene, partial cds; mitochondrial	39.4	39.4	1	0.004	0.95	KR577733.1	313	....A................	333
1034Select seq gb|KR577724.1|	Aphidinae sp. BOLD-2016 voucher BIOUG13898-E06 cytochrome oxidase subunit 1 (COI) gene, partial cds; mitochondrial	39.4	39.4	1	0.004	0.95	KR577724.1	313	....A................	333
1035Select seq gb|KR577723.1|	Ceruraphis sp. BOLD-2016 voucher BIOUG01755-B05 cytochrome oxidase subunit 1 (COI) gene, partial cds; mitochondrial	39.4	39.4	1	0.004	0.95	KR577723.1	313	....A................	333
1036Select seq gb|KR577720.1|	Diuraphis sp. BOLD-2016 voucher BIOUG08284-F11 cytochrome oxidase subunit 1 (COI) gene, partial cds; mitochondrial	39.4	39.4	1	0.004	0.95	KR577720.1	303	....A................	323
1037Select seq gb|KR577711.1|	Macrosiphum sp. BOLD-2016 voucher BIOUG09178-F05 cytochrome oxidase subunit 1 (COI) gene, partial cds; mitochondrial	39.4	39.4	1	0.004	0.95	KR577711.1	303	....A................	323
1038Select seq gb|KR577697.1|	Metopolophium sp. BOLD:AAE7796 voucher BIOUG16008-D01 cytochrome oxidase subunit 1 (COI) gene, partial cds; mitochondrial	39.4	39.4	1	0.004	0.95	KR577697.1	288	....A................	308
1039Select seq gb|KR577690.1|	Braggia sp. BOLD-2016 voucher BIOUG04653-G04 cytochrome oxidase subunit 1 (COI) gene, partial cds; mitochondrial	39.4	39.4	1	0.004	0.95	KR577690.1	313	....A................	333
1040Select seq gb|KR577674.1|	Macrosiphum sp. BOLD-2016 voucher BIOUG05092-D07 cytochrome oxidase subunit 1 (COI) gene, partial cds; mitochondrial	39.4	39.4	1	0.004	0.95	KR577674.1	282	....A................	302
1041Select seq gb|KR577640.1|	Rhopalosiphum sp. BOLD:AAD1504 voucher BIOUG07903-C06 cytochrome oxidase subunit 1 (COI) gene, partial cds; mitochondrial	39.4	39.4	1	0.004	0.95	KR577640.1	312	....A................	332
1042Select seq gb|KR577639.1|	Capitophorus hippophaes voucher BIOUG16152-A09 cytochrome oxidase subunit 1 (COI) gene, partial cds; mitochondrial	39.4	39.4	1	0.004	0.95	KR577639.1	303	....A................	323
1043Select seq gb|KR577624.1|	Tetraneura sp. BOLD:AAG3894 voucher BIOUG08337-F09 cytochrome oxidase subunit 1 (COI) gene, partial cds; mitochondrial	39.4	39.4	1	0.004	0.95	KR577624.1	303	....A................	323
1044Select seq gb|KR577621.1|	Phorodon humuli voucher BIOUG08564-B07 cytochrome oxidase subunit 1 (COI) gene, partial cds; mitochondrial	39.4	39.4	1	0.004	0.95	KR577621.1	312	....A................	332
1045Select seq gb|KR577580.1|	Metopolophium sp. BOLD:AAE7796 voucher BIOUG09175-E09 cytochrome oxidase subunit 1 (COI) gene, partial cds; mitochondrial	39.4	39.4	1	0.004	0.95	KR577580.1	313	....A................	333
1046Select seq gb|KR577547.1|	Calaphidinae sp. BOLD-2016 voucher BIOUG16130-H04 cytochrome oxidase subunit 1 (COI) gene, partial cds; mitochondrial	39.4	39.4	1	0.004	0.95	KR577547.1	312	....A................	332
1047Select seq gb|KR577491.1|	Calaphidinae sp. BOLD-2016 voucher BIOUG04225-B10 cytochrome oxidase subunit 1 (COI) gene, partial cds; mitochondrial	39.4	39.4	1	0.004	0.95	KR577491.1	313	....A................	333
1048Select seq gb|KR577478.1|	Aphidinae sp. BOLD:AAB1787 voucher BIOUG02739-E08 cytochrome oxidase subunit 1 (COI) gene, partial cds; mitochondrial	39.4	39.4	1	0.004	0.95	KR577478.1	313	....A................	333
1049Select seq gb|KR577459.1|	Aphidinae sp. BOLD-2016 voucher BIOUG05473-E05 cytochrome oxidase subunit 1 (COI) gene, partial cds; mitochondrial	39.4	39.4	1	0.004	0.95	KR577459.1	305	....A................	325
1050Select seq gb|KR577404.1|	Aphidinae sp. BOLD-2016 voucher BIOUG12861-G09 cytochrome oxidase subunit 1 (COI) gene, partial cds; mitochondrial	39.4	39.4	1	0.004	0.95	KR577404.1	309	....A................	329
1051Select seq gb|KR577401.1|	Macrosiphum sp. BOLD-2016 voucher BIOUG09180-E04 cytochrome oxidase subunit 1 (COI) gene, partial cds; mitochondrial	39.4	39.4	1	0.004	0.95	KR577401.1	251	....A................	271
1052Select seq gb|KR577383.1|	Calaphidinae sp. BOLD-2016 voucher BIOUG03852-E11 cytochrome oxidase subunit 1 (COI) gene, partial cds; mitochondrial	39.4	39.4	1	0.004	0.95	KR577383.1	313	....A................	333
1053Select seq gb|KR577374.1|	Callipterinella sp. BOLD-2016 voucher BIOUG16115-B03 cytochrome oxidase subunit 1 (COI) gene, partial cds; mitochondrial	39.4	39.4	1	0.004	0.95	KR577374.1	303	....A................	323
1054Select seq gb|KR577354.1|	Aphis sp. BOLD:AAA6378 voucher BIOUG04653-C08 cytochrome oxidase subunit 1 (COI) gene, partial cds; mitochondrial	39.4	39.4	1	0.004	0.95	KR577354.1	276	....A................	296
1055Select seq gb|KR577335.1|	Aphis glycines voucher BIOUG01607-B10 cytochrome oxidase subunit 1 (COI) gene, partial cds; mitochondrial	39.4	39.4	1	0.004	0.95	KR577335.1	313	....A................	333
1056Select seq gb|KR577327.1|	Metcalfa pruinosa voucher BIOUG07033-B12 cytochrome oxidase subunit 1 (COI) gene, partial cds; mitochondrial	39.4	39.4	1	0.004	0.95	KR577327.1	189	....T................	209
1057Select seq gb|KR577310.1|	Acyrthosiphon sp. BOLD:AAB1787 voucher BIOUG16097-C08 cytochrome oxidase subunit 1 (COI) gene, partial cds; mitochondrial	39.4	39.4	1	0.004	0.95	KR577310.1	312	....A................	332
1058Select seq gb|KR577293.1|	Ceruraphis sp. BOLD-2016 voucher 10BBCHEM-1240 cytochrome oxidase subunit 1 (COI) gene, partial cds; mitochondrial	39.4	39.4	1	0.004	0.95	KR577293.1	313	....A................	333
1059Select seq gb|KR577269.1|	Uroleucon sp. BOLD-2016 voucher BIOUG09174-B02 cytochrome oxidase subunit 1 (COI) gene, partial cds; mitochondrial	39.4	39.4	1	0.004	0.95	KR577269.1	300	....A................	320
1060Select seq gb|KR577244.1|	Illinoia sp. BOLD-2016 voucher BIOUG03380-G01 cytochrome oxidase subunit 1 (COI) gene, partial cds; mitochondrial	39.4	39.4	1	0.004	0.95	KR577244.1	313	....A................	333
1061Select seq gb|KR577237.1|	Macrosiphum sp. BOLD-2016 voucher BIOUG06358-B11 cytochrome oxidase subunit 1 (COI) gene, partial cds; mitochondrial	39.4	39.4	1	0.004	0.95	KR577237.1	304	....A................	324
1062Select seq gb|KR577221.1|	Aulacorthum sp. BOLD:AAB2572 voucher BIOUG08044-H03 cytochrome oxidase subunit 1 (COI) gene, partial cds; mitochondrial	39.4	39.4	1	0.004	0.95	KR577221.1	294	....A................	314
1063Select seq gb|KR577185.1|	Metopolophium sp. BOLD-2016 voucher BIOUG06155-B03 cytochrome oxidase subunit 1 (COI) gene, partial cds; mitochondrial	39.4	39.4	1	0.004	0.95	KR577185.1	305	....A................	325
1064Select seq gb|KR577158.1|	Calaphidinae sp. BOLD-2016 voucher BIOUG04097-D10 cytochrome oxidase subunit 1 (COI) gene, partial cds; mitochondrial	39.4	39.4	1	0.004	0.95	KR577158.1	313	....A................	333
1065Select seq gb|KR577129.1|	Aphidinae sp. BOLD:AAB1787 voucher BIOUG07387-G04 cytochrome oxidase subunit 1 (COI) gene, partial cds; mitochondrial	39.4	39.4	1	0.004	0.95	KR577129.1	293	....A................	313
1066Select seq gb|KR577075.1|	Uroleucon sp. BOLD-2016 voucher BIOUG09180-A12 cytochrome oxidase subunit 1 (COI) gene, partial cds; mitochondrial	39.4	39.4	1	0.004	0.95	KR577075.1	284	....A................	304
1067Select seq gb|KR577055.1|	Aphididae sp. BOLD:ACE5126 voucher BIOUG13141-B12 cytochrome oxidase subunit 1 (COI) gene, partial cds; mitochondrial	39.4	39.4	1	0.004	0.95	KR577055.1	313	....A................	333
1068Select seq gb|KR577052.1|	Macrosiphum sp. BOLD-2016 voucher BIOUG09180-H06 cytochrome oxidase subunit 1 (COI) gene, partial cds; mitochondrial	39.4	39.4	1	0.004	0.95	KR577052.1	300	....A................	320
1069Select seq gb|KR577039.1|	Aphididae sp. BOLD:AAD9153 voucher BIOUG09137-G08 cytochrome oxidase subunit 1 (COI) gene, partial cds; mitochondrial	39.4	39.4	1	0.004	0.95	KR577039.1	305	....A................	325
1070Select seq gb|KR577026.1|	Aphis sp. BOLD:AAA4183 voucher BIOUG07811-F12 cytochrome oxidase subunit 1 (COI) gene, partial cds; mitochondrial	39.4	39.4	1	0.004	0.95	KR577026.1	314	....A................	334
1071Select seq gb|KR577013.1|	Calaphidinae sp. BOLD-2016 voucher BIOUG04197-A08 cytochrome oxidase subunit 1 (COI) gene, partial cds; mitochondrial	39.4	39.4	1	0.004	0.95	KR577013.1	313	....A................	333
1072Select seq gb|KR577005.1|	Macrosiphum sp. BOLD-2016 voucher BIOUG09179-H09 cytochrome oxidase subunit 1 (COI) gene, partial cds; mitochondrial	39.4	39.4	1	0.004	0.95	KR577005.1	300	....A................	320
1073Select seq gb|KR577004.1|	Calaphidinae sp. BOLD-2016 voucher BIOUG04225-D09 cytochrome oxidase subunit 1 (COI) gene, partial cds; mitochondrial	39.4	39.4	1	0.004	0.95	KR577004.1	313	....A................	333
1074Select seq gb|KR576983.1|	Aphididae sp. BOLD:ACE5126 voucher BIOUG13563-B11 cytochrome oxidase subunit 1 (COI) gene, partial cds; mitochondrial	39.4	39.4	1	0.004	0.95	KR576983.1	313	....A................	333
1075Select seq gb|KR576967.1|	Macrosiphum sp. BOLD-2016 voucher BIOUG06688-C01 cytochrome oxidase subunit 1 (COI) gene, partial cds; mitochondrial	39.4	39.4	1	0.004	0.95	KR576967.1	313	....A................	333
1076Select seq gb|KR576963.1|	Macrosiphum sp. BOLD-2016 voucher BIOUG09127-A05 cytochrome oxidase subunit 1 (COI) gene, partial cds; mitochondrial	39.4	39.4	1	0.004	0.95	KR576963.1	303	....A................	323
1077Select seq gb|KR576961.1|	Macrosiphum sp. BOLD-2016 voucher BIOUG04745-D03 cytochrome oxidase subunit 1 (COI) gene, partial cds; mitochondrial	39.4	39.4	1	0.004	0.95	KR576961.1	312	....A................	332
1078Select seq gb|KR576923.1|	Uroleucon sp. BOLD-2016 voucher BIOUG05100-A07 cytochrome oxidase subunit 1 (COI) gene, partial cds; mitochondrial	39.4	39.4	1	0.004	0.95	KR576923.1	282	....A................	302
1079Select seq gb|KR576913.1|	Aphis spiraecola voucher BIOUG07279-G02 cytochrome oxidase subunit 1 (COI) gene, partial cds; mitochondrial	39.4	39.4	1	0.004	0.95	KR576913.1	313	....A................	333
1080Select seq gb|KR576891.1|	Macrosiphum sp. BOLD-2016 voucher BIOUG06252-A04 cytochrome oxidase subunit 1 (COI) gene, partial cds; mitochondrial	39.4	39.4	1	0.004	0.95	KR576891.1	304	....A................	324
1081Select seq gb|KR576884.1|	Flatidae sp. BOLD:AAG4399 voucher BIOUG08321-C02 cytochrome oxidase subunit 1 (COI) gene, partial cds; mitochondrial	39.4	39.4	1	0.004	0.95	KR576884.1	313	....T................	333
1082Select seq gb|KR576877.1|	Macrosiphum sp. BOLD-2016 voucher BIOUG09178-C07 cytochrome oxidase subunit 1 (COI) gene, partial cds; mitochondrial	39.4	39.4	1	0.004	0.95	KR576877.1	305	....A................	325
1083Select seq gb|KR576831.1|	Macrosiphum sp. BOLD-2016 voucher BIOUG09208-D03 cytochrome oxidase subunit 1 (COI) gene, partial cds; mitochondrial	39.4	39.4	1	0.004	0.95	KR576831.1	305	....A................	325
1084Select seq gb|KR576826.1|	Ceruraphis sp. BOLD-2016 voucher BIOUG04359-G08 cytochrome oxidase subunit 1 (COI) gene, partial cds; mitochondrial	39.4	39.4	1	0.004	0.95	KR576826.1	313	....A................	333
1085Select seq gb|KR576795.1|	Calaphidinae sp. BOLD-2016 voucher BIOUG05152-H02 cytochrome oxidase subunit 1 (COI) gene, partial cds; mitochondrial	39.4	39.4	1	0.004	0.95	KR576795.1	313	....A................	333
1086Select seq gb|KR576773.1|	Capitophorus hudsonicus voucher BIOUG07800-H07 cytochrome oxidase subunit 1 (COI) gene, partial cds; mitochondrial	39.4	39.4	1	0.004	0.95	KR576773.1	314	....A................	334
1087Select seq gb|KR576761.1|	Metcalfa pruinosa voucher BIOUG08644-H08 cytochrome oxidase subunit 1 (COI) gene, partial cds; mitochondrial	39.4	39.4	1	0.004	0.95	KR576761.1	277	....T................	297
1088Select seq gb|KR576756.1|	Calaphidinae sp. BOLD-2016 voucher BIOUG03716-E09 cytochrome oxidase subunit 1 (COI) gene, partial cds; mitochondrial	39.4	39.4	1	0.004	0.95	KR576756.1	313	....A................	333
1089Select seq gb|KR576753.1|	Macrosiphum sp. BOLD-2016 voucher BIOUG06155-D06 cytochrome oxidase subunit 1 (COI) gene, partial cds; mitochondrial	39.4	39.4	1	0.004	0.95	KR576753.1	305	....A................	325
1090Select seq gb|KR576743.1|	Monellia sp. BOLD-2016 voucher BIOUG07002-E11 cytochrome oxidase subunit 1 (COI) gene, partial cds; mitochondrial	39.4	39.4	1	0.004	0.95	KR576743.1	305	....A................	325
1091Select seq gb|KR576742.1|	Illinoia sp. BOLD-2016 voucher BIOUG08403-D01 cytochrome oxidase subunit 1 (COI) gene, partial cds; mitochondrial	39.4	39.4	1	0.004	0.95	KR576742.1	313	....A................	333
1092Select seq gb|KR576733.1|	Amphorophora sp. BOLD:AAF4380 voucher BIOUG06525-A04 cytochrome oxidase subunit 1 (COI) gene, partial cds; mitochondrial	39.4	39.4	1	0.004	0.95	KR576733.1	313	....A................	333
1093Select seq gb|KR576731.1|	Aphis rubicola voucher BIOUG06314-B12 cytochrome oxidase subunit 1 (COI) gene, partial cds; mitochondrial	39.4	39.4	1	0.004	0.95	KR576731.1	156	....A................	176
1094Select seq gb|KR576726.1|	Aphis sp. BOLD:AAB7937 voucher BIOUG04445-H11 cytochrome oxidase subunit 1 (COI) gene, partial cds; mitochondrial	39.4	39.4	1	0.004	0.95	KR576726.1	303	....A................	323
1095Select seq gb|KR576663.1|	Metopolophium sp. BOLD:AAE7796 voucher BIOUG16130-G02 cytochrome oxidase subunit 1 (COI) gene, partial cds; mitochondrial	39.4	39.4	1	0.004	0.95	KR576663.1	312	....A................	332
1096Select seq gb|KR576652.1|	Illinoia sp. BOLD-2016 voucher BIOUG09208-C05 cytochrome oxidase subunit 1 (COI) gene, partial cds; mitochondrial	39.4	39.4	1	0.004	0.95	KR576652.1	296	....A................	316
1097Select seq gb|KR576647.1|	Aphis rubicola voucher BIOUG07130-H01 cytochrome oxidase subunit 1 (COI) gene, partial cds; mitochondrial	39.4	39.4	1	0.004	0.95	KR576647.1	313	....A................	333
1098Select seq gb|KR576625.1|	Aphidinae sp. BOLD-2016 voucher BIOUG14005-A07 cytochrome oxidase subunit 1 (COI) gene, partial cds; mitochondrial	39.4	39.4	1	0.004	0.95	KR576625.1	292	....A................	312
1099Select seq gb|KR576607.1|	Calaphidinae sp. BOLD-2016 voucher BIOUG03716-B07 cytochrome oxidase subunit 1 (COI) gene, partial cds; mitochondrial	39.4	39.4	1	0.004	0.95	KR576607.1	313	....A................	333
1100Select seq gb|KR576603.1|	Macrosiphum sp. BOLD-2016 voucher BIOUG08392-E01 cytochrome oxidase subunit 1 (COI) gene, partial cds; mitochondrial	39.4	39.4	1	0.004	0.95	KR576603.1	303	....A................	323
1101Select seq gb|KR576544.1|	Aphis sp. BOLD:AAA6378 voucher BIOUG06688-C02 cytochrome oxidase subunit 1 (COI) gene, partial cds; mitochondrial	39.4	39.4	1	0.004	0.95	KR576544.1	303	....A................	323
1102Select seq gb|KR576529.1|	Macrosiphum sp. BOLD-2016 voucher BIOUG09180-F09 cytochrome oxidase subunit 1 (COI) gene, partial cds; mitochondrial	39.4	39.4	1	0.004	0.95	KR576529.1	313	....A................	333
1103Select seq gb|KR576517.1|	Calaphidinae sp. BOLD-2016 voucher BIOUG03852-E02 cytochrome oxidase subunit 1 (COI) gene, partial cds; mitochondrial	39.4	39.4	1	0.004	0.95	KR576517.1	313	....A................	333
1104Select seq gb|KR576511.1|	Macrosiphum sp. BOLD-2016 voucher BIOUG09177-G07 cytochrome oxidase subunit 1 (COI) gene, partial cds; mitochondrial	39.4	39.4	1	0.004	0.95	KR576511.1	305	....A................	325
1105Select seq gb|KR576486.1|	Calaphidinae sp. BOLD-2016 voucher BIOUG04197-G09 cytochrome oxidase subunit 1 (COI) gene, partial cds; mitochondrial	39.4	39.4	1	0.004	0.95	KR576486.1	313	....A................	333
1106Select seq gb|KR576477.1|	Macrosiphum sp. BOLD-2016 voucher BIOUG05956-H11 cytochrome oxidase subunit 1 (COI) gene, partial cds; mitochondrial	39.4	39.4	1	0.004	0.95	KR576477.1	305	....A................	325
1107Select seq gb|KR576472.1|	Rhopalosiphum cerasifoliae voucher BIOUG12629-D07 cytochrome oxidase subunit 1 (COI) gene, partial cds; mitochondrial	39.4	39.4	1	0.004	0.95	KR576472.1	312	....A................	332
1108Select seq gb|KR564158.1|	Macrosiphum sp. BOLD-2016 voucher BIOUG07601-B01 cytochrome oxidase subunit 1 (COI) gene, partial cds; mitochondrial	39.4	39.4	1	0.004	0.95	KR564158.1	313	....A................	333
1109Select seq gb|KR564149.1|	Calaphidinae sp. BOLD-2016 voucher BIOUG03852-G10 cytochrome oxidase subunit 1 (COI) gene, partial cds; mitochondrial	39.4	39.4	1	0.004	0.95	KR564149.1	313	....A................	333
1110Select seq gb|KR564132.1|	Nearctaphis bakeri voucher BIOUG13349-H07 cytochrome oxidase subunit 1 (COI) gene, partial cds; mitochondrial	39.4	39.4	1	0.004	0.95	KR564132.1	300	....A................	320
1111Select seq gb|KR564123.1|	Metopolophium sp. BOLD:AAE7796 voucher BIOUG16018-F04 cytochrome oxidase subunit 1 (COI) gene, partial cds; mitochondrial	39.4	39.4	1	0.004	0.95	KR564123.1	313	....A................	333
1112Select seq gb|KR564087.1|	Flatidae sp. BOLD:AAG4399 voucher BIOUG08805-A08 cytochrome oxidase subunit 1 (COI) gene, partial cds; mitochondrial	39.4	39.4	1	0.004	0.95	KR564087.1	284	....T................	304
1113Select seq gb|KR564039.1|	Uroleucon (Uroleucon) sp. BOLD-2016 voucher BIOUG16087-B10 cytochrome oxidase subunit 1 (COI) gene, partial cds; mitochondrial	39.4	39.4	1	0.004	0.95	KR564039.1	303	....A................	323
1114Select seq gb|KR564032.1|	Macrosiphum sp. BOLD-2016 voucher BIOUG06252-H01 cytochrome oxidase subunit 1 (COI) gene, partial cds; mitochondrial	39.4	39.4	1	0.004	0.95	KR564032.1	302	....A................	322
1115Select seq gb|KR564018.1|	Aphididae sp. BOLD:AAF1937 voucher BIOUG09640-B11 cytochrome oxidase subunit 1 (COI) gene, partial cds; mitochondrial	39.4	39.4	1	0.004	0.95	KR564018.1	305	....A................	325
1116Select seq gb|KR564012.1|	Cryptomyzus sp. BOLD:ABX5354 voucher BIOUG16131-E09 cytochrome oxidase subunit 1 (COI) gene, partial cds; mitochondrial	39.4	39.4	1	0.004	0.95	KR564012.1	303	....A................	323
1117Select seq gb|KR564000.1|	Aphididae sp. BOLD:AAI3997 voucher BIOUG13141-A05 cytochrome oxidase subunit 1 (COI) gene, partial cds; mitochondrial	39.4	39.4	1	0.004	0.95	KR564000.1	313	....A................	333
1118Select seq gb|KR563983.1|	Metcalfa pruinosa voucher BIOUG08686-C12 cytochrome oxidase subunit 1 (COI) gene, partial cds; mitochondrial	39.4	39.4	1	0.004	0.95	KR563983.1	223	....T................	243
1119Select seq gb|KR563942.1|	Macrosiphum sp. BOLD-2016 voucher BIOUG06252-H11 cytochrome oxidase subunit 1 (COI) gene, partial cds; mitochondrial	39.4	39.4	1	0.004	0.95	KR563942.1	305	....A................	325
1120Select seq gb|KR563906.1|	Aphis sp. BOLD:AAB7937 voucher BIOUG16152-B04 cytochrome oxidase subunit 1 (COI) gene, partial cds; mitochondrial	39.4	39.4	1	0.004	0.95	KR563906.1	303	....A................	323
1121Select seq gb|KR563860.1|	Uroleucon sp. BOLD-2016 voucher BIOUG09178-B06 cytochrome oxidase subunit 1 (COI) gene, partial cds; mitochondrial	39.4	39.4	1	0.004	0.95	KR563860.1	305	....A................	325
1122Select seq gb|KR563836.1|	Illinoia sp. BOLD-2016 voucher BIOUG08284-F12 cytochrome oxidase subunit 1 (COI) gene, partial cds; mitochondrial	39.4	39.4	1	0.004	0.95	KR563836.1	303	....A................	323
1123Select seq gb|KR563823.1|	Macrosiphum sp. BOLD-2016 voucher BIOUG09175-E04 cytochrome oxidase subunit 1 (COI) gene, partial cds; mitochondrial	39.4	39.4	1	0.004	0.95	KR563823.1	305	....A................	325
1124Select seq gb|KR563815.1|	Aphis rubicola voucher BIOUG04653-G08 cytochrome oxidase subunit 1 (COI) gene, partial cds; mitochondrial	39.4	39.4	1	0.004	0.95	KR563815.1	141	....A................	161
1125Select seq gb|KR563757.1|	Uroleucon sp. BOLD-2016 voucher BIOUG09175-C11 cytochrome oxidase subunit 1 (COI) gene, partial cds; mitochondrial	39.4	39.4	1	0.004	0.95	KR563757.1	305	....A................	325
1126Select seq gb|KR563752.1|	Aphididae sp. BOLD:AAF8501 voucher BIOUG13412-D11 cytochrome oxidase subunit 1 (COI) gene, partial cds; mitochondrial	39.4	39.4	1	0.004	0.95	KR563752.1	303	....A................	323
1127Select seq gb|KR563721.1|	Cavariella sp. BOLD:AAC6115 voucher BIOUG06660-H01 cytochrome oxidase subunit 1 (COI) gene, partial cds; mitochondrial	39.4	39.4	1	0.004	0.95	KR563721.1	303	....A................	323
1128Select seq gb|KR563714.1|	Metcalfa pruinosa voucher BIOUG08500-E05 cytochrome oxidase subunit 1 (COI) gene, partial cds; mitochondrial	39.4	39.4	1	0.004	0.95	KR563714.1	282	....T................	302
1129Select seq gb|KR563688.1|	Calaphidinae sp. BOLD-2016 voucher BIOUG03716-A04 cytochrome oxidase subunit 1 (COI) gene, partial cds; mitochondrial	39.4	39.4	1	0.004	0.95	KR563688.1	313	....A................	333
1130Select seq gb|KR563684.1|	Wahlgreniella sp. BOLD-2016 voucher BIOUG04343-A07 cytochrome oxidase subunit 1 (COI) gene, partial cds; mitochondrial	39.4	39.4	1	0.004	0.95	KR563684.1	313	....A................	333
1131Select seq gb|KR563650.1|	Macrosiphum sp. BOLD-2016 voucher BIOUG08659-F09 cytochrome oxidase subunit 1 (COI) gene, partial cds; mitochondrial	39.4	39.4	1	0.004	0.95	KR563650.1	312	....A................	332
1132Select seq gb|KR563641.1|	Aphidinae sp. BOLD:AAB1787 voucher BIOUG06455-C02 cytochrome oxidase subunit 1 (COI) gene, partial cds; mitochondrial	39.4	39.4	1	0.004	0.95	KR563641.1	303	....A................	323
1133Select seq gb|KR563625.1|	Macrosiphum sp. BOLD-2016 voucher BIOUG09178-E10 cytochrome oxidase subunit 1 (COI) gene, partial cds; mitochondrial	39.4	39.4	1	0.004	0.95	KR563625.1	313	....A................	333
1134Select seq gb|KR563595.1|	Aphididae sp. BOLD:AAB1787 voucher BIOUG09640-E05 cytochrome oxidase subunit 1 (COI) gene, partial cds; mitochondrial	39.4	39.4	1	0.004	0.95	KR563595.1	305	....A................	325
1135Select seq gb|KR563591.1|	Macrosiphum sp. BOLD-2016 voucher BIOUG05116-E08 cytochrome oxidase subunit 1 (COI) gene, partial cds; mitochondrial	39.4	39.4	1	0.004	0.95	KR563591.1	291	....A................	311
1136Select seq gb|KR563582.1|	Aphis glycines voucher BIOUG16047-D11 cytochrome oxidase subunit 1 (COI) gene, partial cds; mitochondrial	39.4	39.4	1	0.004	0.95	KR563582.1	312	....A................	332
1137Select seq gb|KR563551.1|	Macrosiphum sp. BOLD-2016 voucher BIOUG09461-C06 cytochrome oxidase subunit 1 (COI) gene, partial cds; mitochondrial	39.4	39.4	1	0.004	0.95	KR563551.1	303	....A................	323
1138Select seq gb|KR563546.1|	Drepanaphis parva voucher BIOUG07033-A12 cytochrome oxidase subunit 1 (COI) gene, partial cds; mitochondrial	39.4	39.4	1	0.004	0.95	KR563546.1	303	....A................	323
1139Select seq gb|KR563528.1|	Drepanaphis sp. BOLD-2016 voucher BIOUG07916-D01 cytochrome oxidase subunit 1 (COI) gene, partial cds; mitochondrial	39.4	39.4	1	0.004	0.95	KR563528.1	303	....A................	323
1140Select seq gb|KR563482.1|	Cinara strobi voucher BIOUG07159-H01 cytochrome oxidase subunit 1 (COI) gene, partial cds; mitochondrial	39.4	39.4	1	0.004	0.95	KR563482.1	313	....A................	333
1141Select seq gb|KR563460.1|	Calaphidinae sp. BOLD-2016 voucher BIOUG04097-F04 cytochrome oxidase subunit 1 (COI) gene, partial cds; mitochondrial	39.4	39.4	1	0.004	0.95	KR563460.1	313	....A................	333
1142Select seq gb|KR563386.1|	Metcalfa pruinosa voucher BIOUG02749-C07 cytochrome oxidase subunit 1 (COI) gene, partial cds; mitochondrial	39.4	39.4	1	0.004	0.95	KR563386.1	19	....T................	39
1143Select seq gb|KR563384.1|	Myzus sp. BOLD:AAB2802 voucher BIOUG16188-H09 cytochrome oxidase subunit 1 (COI) gene, partial cds; mitochondrial	39.4	39.4	1	0.004	0.95	KR563384.1	303	....A................	323
1144Select seq gb|KR563383.1|	Ceruraphis sp. BOLD-2016 voucher BIOUG07931-C07 cytochrome oxidase subunit 1 (COI) gene, partial cds; mitochondrial	39.4	39.4	1	0.004	0.95	KR563383.1	312	....A................	332
1145Select seq gb|KR563360.1|	Uroleucon sp. BOLD-2016 voucher BIOUG09177-A10 cytochrome oxidase subunit 1 (COI) gene, partial cds; mitochondrial	39.4	39.4	1	0.004	0.95	KR563360.1	300	....A................	320
1146Select seq gb|KR563334.1|	Aphidinae sp. BOLD-2016 voucher BIOUG16008-B11 cytochrome oxidase subunit 1 (COI) gene, partial cds; mitochondrial	39.4	39.4	1	0.004	0.95	KR563334.1	313	....A................	333
1147Select seq gb|KR563331.1|	Hyperomyzus picridis voucher BIOUG16008-A12 cytochrome oxidase subunit 1 (COI) gene, partial cds; mitochondrial	39.4	39.4	1	0.004	0.95	KR563331.1	313	....A................	333
1148Select seq gb|KR563310.1|	Calaphidinae sp. BOLD-2016 voucher BIOUG04225-D05 cytochrome oxidase subunit 1 (COI) gene, partial cds; mitochondrial	39.4	39.4	1	0.004	0.95	KR563310.1	313	....A................	333
1149Select seq gb|KR563290.1|	Aphis sp. BOLD:AAA6378 voucher BIOUG06422-A03 cytochrome oxidase subunit 1 (COI) gene, partial cds; mitochondrial	39.4	39.4	1	0.004	0.95	KR563290.1	305	....A................	325
1150Select seq gb|KR563286.1|	Illinoia sp. BOLD-2016 voucher BIOUG03380-G04 cytochrome oxidase subunit 1 (COI) gene, partial cds; mitochondrial	39.4	39.4	1	0.004	0.95	KR563286.1	313	....A................	333
1151Select seq gb|KR563282.1|	Aphidinae sp. BOLD-2016 voucher BIOUG05473-E07 cytochrome oxidase subunit 1 (COI) gene, partial cds; mitochondrial	39.4	39.4	1	0.004	0.95	KR563282.1	304	....A................	324
1152Select seq gb|KR563271.1|	Myzocallis carpini voucher BIOUG16063-E06 cytochrome oxidase subunit 1 (COI) gene, partial cds; mitochondrial	39.4	39.4	1	0.004	0.95	KR563271.1	312	....A................	332
1153Select seq gb|KR563263.1|	Nearctaphis bakeri voucher BIOUG13349-H10 cytochrome oxidase subunit 1 (COI) gene, partial cds; mitochondrial	39.4	39.4	1	0.004	0.95	KR563263.1	303	....A................	323
1154Select seq gb|KR563252.1|	Calaphidinae sp. BOLD-2016 voucher BIOUG04196-C08 cytochrome oxidase subunit 1 (COI) gene, partial cds; mitochondrial	39.4	39.4	1	0.004	0.95	KR563252.1	313	....A................	333
1155Select seq gb|KR563234.1|	Cavariella sp. BOLD:AAC6115 voucher BIOUG05961-A03 cytochrome oxidase subunit 1 (COI) gene, partial cds; mitochondrial	39.4	39.4	1	0.004	0.95	KR563234.1	313	....A................	333
1156Select seq gb|KR563231.1|	Myzus hemerocallis voucher BIOUG16045-D06 cytochrome oxidase subunit 1 (COI) gene, partial cds; mitochondrial	39.4	39.4	1	0.004	0.95	KR563231.1	312	....A................	332
1157Select seq gb|KR563226.1|	Macrosiphum sp. BOLD-2016 voucher BIOUG06688-E09 cytochrome oxidase subunit 1 (COI) gene, partial cds; mitochondrial	39.4	39.4	1	0.004	0.95	KR563226.1	305	....A................	325
1158Select seq gb|KR563225.1|	Nearctaphis bakeri voucher BIOUG16130-B06 cytochrome oxidase subunit 1 (COI) gene, partial cds; mitochondrial	39.4	39.4	1	0.004	0.95	KR563225.1	312	....A................	332
1159Select seq gb|KR563206.1|	Uroleucon sp. BOLD-2016 voucher BIOUG07800-F04 cytochrome oxidase subunit 1 (COI) gene, partial cds; mitochondrial	39.4	39.4	1	0.004	0.95	KR563206.1	313	....A................	333
1160Select seq gb|KR563204.1|	Myzus hemerocallis voucher BIOUG16045-C03 cytochrome oxidase subunit 1 (COI) gene, partial cds; mitochondrial	39.4	39.4	1	0.004	0.95	KR563204.1	312	....A................	332
1161Select seq gb|KR563175.1|	Aphis glycines voucher BIOUG16008-D02 cytochrome oxidase subunit 1 (COI) gene, partial cds; mitochondrial	39.4	39.4	1	0.004	0.95	KR563175.1	297	....A................	317
1162Select seq gb|KR563168.1|	Calaphis betulaecolens voucher BIOUG08450-E12 cytochrome oxidase subunit 1 (COI) gene, partial cds; mitochondrial	39.4	39.4	1	0.004	0.95	KR563168.1	313	....A................	333
1163Select seq gb|KR563154.1|	Chaetosiphon sp. BOLD-2016 voucher BIOUG07321-B08 cytochrome oxidase subunit 1 (COI) gene, partial cds; mitochondrial	39.4	39.4	1	0.004	0.95	KR563154.1	305	....A................	325
1164Select seq gb|KR563143.1|	Macrosiphum sp. BOLD-2016 voucher BIOUG06251-H03 cytochrome oxidase subunit 1 (COI) gene, partial cds; mitochondrial	39.4	39.4	1	0.004	0.95	KR563143.1	304	....A................	324
1165Select seq gb|KR563124.1|	Uroleucon sp. BOLD-2016 voucher BIOUG09179-G02 cytochrome oxidase subunit 1 (COI) gene, partial cds; mitochondrial	39.4	39.4	1	0.004	0.95	KR563124.1	304	....A................	324
1166Select seq gb|KR563118.1|	Thripsaphis sp. BOLD:AAG3014 voucher CHU06-APH-114 cytochrome oxidase subunit 1 (COI) gene, partial cds; mitochondrial	39.4	39.4	1	0.004	0.95	KR563118.1	313	....A................	333
1167Select seq gb|KR563116.1|	Aphis canae voucher BIOUG07587-G11 cytochrome oxidase subunit 1 (COI) gene, partial cds; mitochondrial	39.4	39.4	1	0.004	0.95	KR563116.1	313	....A................	333
1168Select seq gb|KR563083.1|	Macrosiphum sp. BOLD-2016 voucher BIOUG05152-A05 cytochrome oxidase subunit 1 (COI) gene, partial cds; mitochondrial	39.4	39.4	1	0.004	0.95	KR563083.1	313	....A................	333
1169Select seq gb|KR563075.1|	Hyperomyzus picridis voucher BIOUG16008-A11 cytochrome oxidase subunit 1 (COI) gene, partial cds; mitochondrial	39.4	39.4	1	0.004	0.95	KR563075.1	291	....A................	311
1170Select seq gb|KR563011.1|	Illinoia sp. BOLD-2016 voucher BIOUG09180-E11 cytochrome oxidase subunit 1 (COI) gene, partial cds; mitochondrial	39.4	39.4	1	0.004	0.95	KR563011.1	305	....A................	325
1171Select seq gb|KR562975.1|	Aphididae sp. BOLD:AAC1080 voucher BIOUG13926-A03 cytochrome oxidase subunit 1 (COI) gene, partial cds; mitochondrial	39.4	39.4	1	0.004	0.95	KR562975.1	303	....A................	323
1172Select seq gb|KR562958.1|	Uroleucon sp. BOLD-2016 voucher BIOUG05152-C02 cytochrome oxidase subunit 1 (COI) gene, partial cds; mitochondrial	39.4	39.4	1	0.004	0.95	KR562958.1	313	....A................	333
1173Select seq gb|KR562957.1|	Nasonovia sp. BOLD:AAB9332 voucher BIOUG16101-H06 cytochrome oxidase subunit 1 (COI) gene, partial cds; mitochondrial	39.4	39.4	1	0.004	0.95	KR562957.1	313	....A................	333
1174Select seq gb|KR562951.1|	Protaphis middletonii voucher BIOUG07905-A02 cytochrome oxidase subunit 1 (COI) gene, partial cds; mitochondrial	39.4	39.4	1	0.004	0.95	KR562951.1	312	....A................	332
1175Select seq gb|KR562950.1|	Macrosiphum sp. BOLD-2016 voucher BIOUG16094-G05 cytochrome oxidase subunit 1 (COI) gene, partial cds; mitochondrial	39.4	39.4	1	0.004	0.95	KR562950.1	303	....A................	323
1176Select seq gb|KR562935.1|	Macrosiphum sp. BOLD-2016 voucher BIOUG09173-G10 cytochrome oxidase subunit 1 (COI) gene, partial cds; mitochondrial	39.4	39.4	1	0.004	0.95	KR562935.1	313	....A................	333
1177Select seq gb|KR562927.1|	Aphididae sp. BOLD:ACF4664 voucher BIOUG14258-A11 cytochrome oxidase subunit 1 (COI) gene, partial cds; mitochondrial	39.4	39.4	1	0.004	0.95	KR562927.1	303	....A................	323
1178Select seq gb|KR562926.1|	Calaphidinae sp. BOLD-2016 voucher BIOUG03541-G01 cytochrome oxidase subunit 1 (COI) gene, partial cds; mitochondrial	39.4	39.4	1	0.004	0.95	KR562926.1	313	....A................	333
1179Select seq gb|KR562925.1|	Macrosiphum sp. BOLD-2016 voucher BIOUG05821-F09 cytochrome oxidase subunit 1 (COI) gene, partial cds; mitochondrial	39.4	39.4	1	0.004	0.95	KR562925.1	313	....A................	333
1180Select seq gb|KR562911.1|	Callipterinella sp. BOLD-2016 voucher BIOUG16131-E07 cytochrome oxidase subunit 1 (COI) gene, partial cds; mitochondrial	39.4	39.4	1	0.004	0.95	KR562911.1	303	....A................	323
1181Select seq gb|KR562909.1|	Rhopalosiphum nymphaeae voucher BIOUG16025-C12 cytochrome oxidase subunit 1 (COI) gene, partial cds; mitochondrial	39.4	39.4	1	0.004	0.95	KR562909.1	313	....A................	333
1182Select seq gb|KR562880.1|	Macrosiphum sp. BOLD-2016 voucher BIOUG06252-H02 cytochrome oxidase subunit 1 (COI) gene, partial cds; mitochondrial	39.4	39.4	1	0.004	0.95	KR562880.1	305	....A................	325
1183Select seq gb|KR562864.1|	Macrosiphum sp. BOLD-2016 voucher BIOUG09179-C05 cytochrome oxidase subunit 1 (COI) gene, partial cds; mitochondrial	39.4	39.4	1	0.004	0.95	KR562864.1	305	....A................	325
1184Select seq gb|KR562841.1|	Illinoia sp. BOLD-2016 voucher BIOUG16041-C02 cytochrome oxidase subunit 1 (COI) gene, partial cds; mitochondrial	39.4	39.4	1	0.004	0.95	KR562841.1	312	....A................	332
1185Select seq gb|KR562821.1|	Calaphidinae sp. BOLD-2016 voucher BIOUG03696-F12 cytochrome oxidase subunit 1 (COI) gene, partial cds; mitochondrial	39.4	39.4	1	0.004	0.95	KR562821.1	273	....A................	293
1186Select seq gb|KR562801.1|	Illinoia sp. BOLD-2016 voucher BIOUG09177-F09 cytochrome oxidase subunit 1 (COI) gene, partial cds; mitochondrial	39.4	39.4	1	0.004	0.95	KR562801.1	305	....A................	325
1187Select seq gb|KR562788.1|	Calaphidinae sp. BOLD-2016 voucher BIOUG16131-F04 cytochrome oxidase subunit 1 (COI) gene, partial cds; mitochondrial	39.4	39.4	1	0.004	0.95	KR562788.1	312	....A................	332
1188Select seq gb|KR562775.1|	Macrosiphum sp. BOLD-2016 voucher BIOUG09177-D05 cytochrome oxidase subunit 1 (COI) gene, partial cds; mitochondrial	39.4	39.4	1	0.004	0.95	KR562775.1	305	....A................	325
1189Select seq gb|KR562758.1|	Acyrthosiphon sp. BOLD:AAB1787 voucher BIOUG16088-H03 cytochrome oxidase subunit 1 (COI) gene, partial cds; mitochondrial	39.4	39.4	1	0.004	0.95	KR562758.1	312	....A................	332
1190Select seq gb|KR562731.1|	Illinoia sp. BOLD-2016 voucher BIOUG09173-G04 cytochrome oxidase subunit 1 (COI) gene, partial cds; mitochondrial	39.4	39.4	1	0.004	0.95	KR562731.1	309	....A................	329
1191Select seq gb|KR562707.1|	Periphyllus testudinaceus voucher BIOUG07292-E05 cytochrome oxidase subunit 1 (COI) gene, partial cds; mitochondrial	39.4	39.4	1	0.004	0.95	KR562707.1	313	....A................	333
1192Select seq gb|KR562698.1|	Brachycaudus sp. BOLD:AAC1165 voucher BIOUG12132-B01 cytochrome oxidase subunit 1 (COI) gene, partial cds; mitochondrial	39.4	39.4	1	0.004	0.95	KR562698.1	312	....A................	332
1193Select seq gb|KR562656.1|	Macrosiphum zionense voucher BIOUG09237-D08 cytochrome oxidase subunit 1 (COI) gene, partial cds; mitochondrial	39.4	39.4	1	0.004	0.95	KR562656.1	303	....A................	323
1194Select seq gb|KR562636.1|	Hyadaphis sp. BOLD:ACE3923 voucher BIOUG16094-H10 cytochrome oxidase subunit 1 (COI) gene, partial cds; mitochondrial	39.4	39.4	1	0.004	0.95	KR562636.1	312	....A................	332
1195Select seq gb|KR562631.1|	Calaphidinae sp. BOLD-2016 voucher BIOUG03672-H10 cytochrome oxidase subunit 1 (COI) gene, partial cds; mitochondrial	39.4	39.4	1	0.004	0.95	KR562631.1	313	....A................	333
1196Select seq gb|KR562625.1|	Metopolophium sp. BOLD-2016 voucher BIOUG03941-B08 cytochrome oxidase subunit 1 (COI) gene, partial cds; mitochondrial	39.4	39.4	1	0.004	0.95	KR562625.1	313	....A................	333
1197Select seq gb|KR562621.1|	Calaphidinae sp. BOLD-2016 voucher BIOUG03672-F02 cytochrome oxidase subunit 1 (COI) gene, partial cds; mitochondrial	39.4	39.4	1	0.004	0.95	KR562621.1	287	....A................	307
1198Select seq gb|KR562610.1|	Aphidinae sp. BOLD-2016 voucher BIOUG03971-E03 cytochrome oxidase subunit 1 (COI) gene, partial cds; mitochondrial	39.4	39.4	1	0.004	0.95	KR562610.1	313	....A................	333
1199Select seq gb|KR562552.1|	Aphidinae sp. BOLD-2016 voucher BIOUG09214-H10 cytochrome oxidase subunit 1 (COI) gene, partial cds; mitochondrial	39.4	39.4	1	0.004	0.95	KR562552.1	305	....A................	325
1200Select seq gb|KR562525.1|	Macrosiphum sp. BOLD-2016 voucher BIOUG06688-F06 cytochrome oxidase subunit 1 (COI) gene, partial cds; mitochondrial	39.4	39.4	1	0.004	0.95	KR562525.1	275	....A................	295
1201Select seq gb|KR562523.1|	Chaitophorus sp. BOLD-2016 voucher BIOUG12525-G09 cytochrome oxidase subunit 1 (COI) gene, partial cds; mitochondrial	39.4	39.4	1	0.004	0.95	KR562523.1	282	....A................	302
1202Select seq gb|KR562516.1|	Cavariella sp. BOLD:AAC6115 voucher BIOUG06240-H11 cytochrome oxidase subunit 1 (COI) gene, partial cds; mitochondrial	39.4	39.4	1	0.004	0.95	KR562516.1	303	....A................	323
1203Select seq gb|KR562509.1|	Aphidinae sp. BOLD-2016 voucher BIOUG14005-B02 cytochrome oxidase subunit 1 (COI) gene, partial cds; mitochondrial	39.4	39.4	1	0.004	0.95	KR562509.1	292	....A................	312
1204Select seq gb|KR562493.1|	Myzus lythri voucher BIOUG07962-G08 cytochrome oxidase subunit 1 (COI) gene, partial cds; mitochondrial	39.4	39.4	1	0.004	0.95	KR562493.1	313	....A................	333
1205Select seq gb|KR562468.1|	Aphididae sp. BOLD:AAG3894 voucher BIOUG13927-H07 cytochrome oxidase subunit 1 (COI) gene, partial cds; mitochondrial	39.4	39.4	1	0.004	0.95	KR562468.1	303	....A................	323
1206Select seq gb|KR562429.1|	Calaphidinae sp. BOLD-2016 voucher BIOUG03716-B06 cytochrome oxidase subunit 1 (COI) gene, partial cds; mitochondrial	39.4	39.4	1	0.004	0.95	KR562429.1	313	....A................	333
1207Select seq gb|KR562408.1|	Aphis nerii voucher BIOUG08377-B05 cytochrome oxidase subunit 1 (COI) gene, partial cds; mitochondrial	39.4	39.4	1	0.004	0.95	KR562408.1	312	....A................	332
1208Select seq gb|KR562389.1|	Myzus sp. BOLD:AAA7683 voucher BIOUG16093-B08 cytochrome oxidase subunit 1 (COI) gene, partial cds; mitochondrial	39.4	39.4	1	0.004	0.95	KR562389.1	238	....A................	258
1209Select seq gb|KR562370.1|	Saltusaphidinae sp. BOLD-2016 voucher BIOUG06859-C08 cytochrome oxidase subunit 1 (COI) gene, partial cds; mitochondrial	39.4	39.4	1	0.004	0.95	KR562370.1	303	....A................	323
1210Select seq gb|KR562363.1|	Aphididae sp. BOLD:AAC1080 voucher BIOUG13212-C07 cytochrome oxidase subunit 1 (COI) gene, partial cds; mitochondrial	39.4	39.4	1	0.004	0.95	KR562363.1	303	....A................	323
1211Select seq gb|KR562361.1|	Rhopalomyzus lonicerae voucher BIOUG08639-F03 cytochrome oxidase subunit 1 (COI) gene, partial cds; mitochondrial	39.4	39.4	1	0.004	0.95	KR562361.1	312	....A................	332
1212Select seq gb|KR562342.1|	Ceruraphis eriophori voucher BIOUG13373-F02 cytochrome oxidase subunit 1 (COI) gene, partial cds; mitochondrial	39.4	39.4	1	0.004	0.95	KR562342.1	312	....A................	332
1213Select seq gb|KR562339.1|	Phylloxeridae sp. BOLD-2016 voucher BIOUG01643-C11 cytochrome oxidase subunit 1 (COI) gene, partial cds; mitochondrial	39.4	39.4	1	0.004	0.95	KR562339.1	313	....A................	333
1214Select seq gb|KR562338.1|	Calaphidinae sp. BOLD-2016 voucher BIOUG04572-A12 cytochrome oxidase subunit 1 (COI) gene, partial cds; mitochondrial	39.4	39.4	1	0.004	0.95	KR562338.1	313	....A................	333
1215Select seq gb|KR562309.1|	Macrosiphum sp. BOLD-2016 voucher BIOUG09179-F07 cytochrome oxidase subunit 1 (COI) gene, partial cds; mitochondrial	39.4	39.4	1	0.004	0.95	KR562309.1	306	....A................	326
1216Select seq gb|KR562300.1|	Aphididae sp. BOLD:AAG2059 voucher BIOUG14006-D03 cytochrome oxidase subunit 1 (COI) gene, partial cds; mitochondrial	39.4	39.4	1	0.004	0.95	KR562300.1	292	....A................	312
1217Select seq gb|KR562298.1|	Calaphis leonardi voucher BIOUG08435-G04 cytochrome oxidase subunit 1 (COI) gene, partial cds; mitochondrial	39.4	39.4	1	0.004	0.95	KR562298.1	312	....A................	332
1218Select seq gb|KR562290.1|	Schizaphis sp. BOLD-2016 voucher BIOUG12263-H06 cytochrome oxidase subunit 1 (COI) gene, partial cds; mitochondrial	39.4	39.4	1	0.004	0.95	KR562290.1	312	....A................	332
1219Select seq gb|KR562253.1|	Aphis sp. BOLD:AAA6378 voucher BIOUG12629-E10 cytochrome oxidase subunit 1 (COI) gene, partial cds; mitochondrial	39.4	39.4	1	0.004	0.95	KR562253.1	312	....A................	332
1220Select seq gb|KR562240.1|	Calaphidinae sp. BOLD-2016 voucher BIOUG04097-C04 cytochrome oxidase subunit 1 (COI) gene, partial cds; mitochondrial	39.4	39.4	1	0.004	0.95	KR562240.1	313	....A................	333
1221Select seq gb|KR562228.1|	Macrosiphum sp. BOLD-2016 voucher BIOUG05152-A03 cytochrome oxidase subunit 1 (COI) gene, partial cds; mitochondrial	39.4	39.4	1	0.004	0.95	KR562228.1	313	....A................	333
1222Select seq gb|KR562223.1|	Macrosiphum sp. BOLD-2016 voucher BIOUG06422-C10 cytochrome oxidase subunit 1 (COI) gene, partial cds; mitochondrial	39.4	39.4	1	0.004	0.95	KR562223.1	305	....A................	325
1223Select seq gb|KR562216.1|	Callipterinella sp. BOLD-2016 voucher BIOUG16041-D06 cytochrome oxidase subunit 1 (COI) gene, partial cds; mitochondrial	39.4	39.4	1	0.004	0.95	KR562216.1	303	....A................	323
1224Select seq gb|KR562213.1|	Macrosiphum sp. BOLD-2016 voucher BIOUG09177-A01 cytochrome oxidase subunit 1 (COI) gene, partial cds; mitochondrial	39.4	39.4	1	0.004	0.95	KR562213.1	313	....A................	333
1225Select seq gb|KR562174.1|	Aphidinae sp. BOLD-2016 voucher BIOUG07900-C04 cytochrome oxidase subunit 1 (COI) gene, partial cds; mitochondrial	39.4	39.4	1	0.004	0.95	KR562174.1	312	....A................	332
1226Select seq gb|KR562136.1|	Calaphidinae sp. BOLD-2016 voucher BIOUG06850-B04 cytochrome oxidase subunit 1 (COI) gene, partial cds; mitochondrial	39.4	39.4	1	0.004	0.95	KR562136.1	305	....A................	325
1227Select seq gb|KR562135.1|	Macrosiphum sp. BOLD-2016 voucher BIOUG09176-F02 cytochrome oxidase subunit 1 (COI) gene, partial cds; mitochondrial	39.4	39.4	1	0.004	0.95	KR562135.1	300	....A................	320
1228Select seq gb|KR562128.1|	Calaphidinae sp. BOLD-2016 voucher BIOUG03360-G10 cytochrome oxidase subunit 1 (COI) gene, partial cds; mitochondrial	39.4	39.4	1	0.004	0.95	KR562128.1	313	....A................	333
1229Select seq gb|KR562126.1|	Calaphidinae sp. BOLD-2016 voucher BIOUG04197-B03 cytochrome oxidase subunit 1 (COI) gene, partial cds; mitochondrial	39.4	39.4	1	0.004	0.95	KR562126.1	313	....A................	333
1230Select seq gb|KR562124.1|	Aphis glycines voucher BIOUG01607-D01 cytochrome oxidase subunit 1 (COI) gene, partial cds; mitochondrial	39.4	39.4	1	0.004	0.95	KR562124.1	313	....A................	333
1231Select seq gb|KR562113.1|	Aphidinae sp. BOLD-2016 voucher BIOUG14005-E08 cytochrome oxidase subunit 1 (COI) gene, partial cds; mitochondrial	39.4	39.4	1	0.004	0.95	KR562113.1	292	....A................	312
1232Select seq gb|KR562105.1|	Abstrusomyzus phloxae voucher BIOUG07388-C05 cytochrome oxidase subunit 1 (COI) gene, partial cds; mitochondrial	39.4	39.4	1	0.004	0.95	KR562105.1	313	....A................	333
1233Select seq gb|KR562091.1|	Aphis sp. BOLD:AAB7937 voucher BIOUG10486-F09 cytochrome oxidase subunit 1 (COI) gene, partial cds; mitochondrial	39.4	39.4	1	0.004	0.95	KR562091.1	313	....A................	333
1234Select seq gb|KR562087.1|	Calaphidinae sp. BOLD-2016 voucher BIOUG04196-H08 cytochrome oxidase subunit 1 (COI) gene, partial cds; mitochondrial	39.4	39.4	1	0.004	0.95	KR562087.1	313	....A................	333
1235Select seq gb|KR562082.1|	Aphis sp. BOLD:AAA6378 voucher BIOUG13373-F06 cytochrome oxidase subunit 1 (COI) gene, partial cds; mitochondrial	39.4	39.4	1	0.004	0.95	KR562082.1	312	....A................	332
1236Select seq gb|KR562056.1|	Nearctaphis sp. BOLD-2016 voucher BIOUG03523-C01 cytochrome oxidase subunit 1 (COI) gene, partial cds; mitochondrial	39.4	39.4	1	0.004	0.95	KR562056.1	313	....A................	333
1237Select seq gb|KR562052.1|	Metopolophium sp. BOLD:AAE7796 voucher BIOUG08642-G09 cytochrome oxidase subunit 1 (COI) gene, partial cds; mitochondrial	39.4	39.4	1	0.004	0.95	KR562052.1	303	....A................	323
1238Select seq gb|KR562022.1|	Uroleucon sp. BOLD-2016 voucher BIOUG05961-D08 cytochrome oxidase subunit 1 (COI) gene, partial cds; mitochondrial	39.4	39.4	1	0.004	0.95	KR562022.1	313	....A................	333
1239Select seq gb|KR562019.1|	Macrosiphum sp. BOLD-2016 voucher BIOUG09175-G09 cytochrome oxidase subunit 1 (COI) gene, partial cds; mitochondrial	39.4	39.4	1	0.004	0.95	KR562019.1	300	....A................	320
1240Select seq gb|KR562014.1|	Rhopalosiphum nymphaeae voucher BIOUG16016-D09 cytochrome oxidase subunit 1 (COI) gene, partial cds; mitochondrial	39.4	39.4	1	0.004	0.95	KR562014.1	303	....A................	323
1241Select seq gb|KR562006.1|	Macrosiphum zionense voucher BIOUG09237-A06 cytochrome oxidase subunit 1 (COI) gene, partial cds; mitochondrial	39.4	39.4	1	0.004	0.95	KR562006.1	305	....A................	325
1242Select seq gb|KR561986.1|	Chaetosiphon sp. BOLD-2016 voucher BIOUG05152-A09 cytochrome oxidase subunit 1 (COI) gene, partial cds; mitochondrial	39.4	39.4	1	0.004	0.95	KR561986.1	313	....A................	333
1243Select seq gb|KR561968.1|	Macrosiphum sp. BOLD-2016 voucher BIOUG06251-B01 cytochrome oxidase subunit 1 (COI) gene, partial cds; mitochondrial	39.4	39.4	1	0.004	0.95	KR561968.1	305	....A................	325
1244Select seq gb|KR561943.1|	Macrosiphum sp. BOLD-2016 voucher BIOUG08388-G03 cytochrome oxidase subunit 1 (COI) gene, partial cds; mitochondrial	39.4	39.4	1	0.004	0.95	KR561943.1	303	....A................	323
1245Select seq gb|KR561930.1|	Metopolophium sp. BOLD-2016 voucher 10BBCHEM-0867 cytochrome oxidase subunit 1 (COI) gene, partial cds; mitochondrial	39.4	39.4	1	0.004	0.95	KR561930.1	313	....A................	333
1246Select seq gb|KR561910.1|	Illinoia sp. BOLD-2016 voucher BIOUG03380-F12 cytochrome oxidase subunit 1 (COI) gene, partial cds; mitochondrial	39.4	39.4	1	0.004	0.95	KR561910.1	313	....A................	333
1247Select seq gb|KR561902.1|	Aphthargelia sp. BOLD-2016 voucher 10BBCHEM-0218 cytochrome oxidase subunit 1 (COI) gene, partial cds; mitochondrial	39.4	39.4	1	0.004	0.95	KR561902.1	313	....A................	333
1248Select seq gb|KR561899.1|	Metopolophium sp. BOLD:AAE7796 voucher BIOUG16129-A06 cytochrome oxidase subunit 1 (COI) gene, partial cds; mitochondrial	39.4	39.4	1	0.004	0.95	KR561899.1	312	....A................	332
1249Select seq gb|KR561881.1|	Saltusaphidinae sp. BOLD-2016 voucher BIOUG06659-H01 cytochrome oxidase subunit 1 (COI) gene, partial cds; mitochondrial	39.4	39.4	1	0.004	0.95	KR561881.1	303	....A................	323
1250Select seq gb|KR561872.1|	Macrosiphum sp. BOLD-2016 voucher BIOUG09178-A05 cytochrome oxidase subunit 1 (COI) gene, partial cds; mitochondrial	39.4	39.4	1	0.004	0.95	KR561872.1	244	....A................	264
1251Select seq gb|KR561858.1|	Metcalfa pruinosa voucher BIOUG07002-D12 cytochrome oxidase subunit 1 (COI) gene, partial cds; mitochondrial	39.4	39.4	1	0.004	0.95	KR561858.1	189	....T................	209
1252Select seq gb|KR561850.1|	Calaphidinae sp. BOLD-2016 voucher BIOUG03672-E06 cytochrome oxidase subunit 1 (COI) gene, partial cds; mitochondrial	39.4	39.4	1	0.004	0.95	KR561850.1	313	....A................	333
1253Select seq gb|KR561843.1|	Aphis sp. BOLD:AAE7309 voucher BIOUG07525-C04 cytochrome oxidase subunit 1 (COI) gene, partial cds; mitochondrial	39.4	39.4	1	0.004	0.95	KR561843.1	305	....A................	325
1254Select seq gb|KR561825.1|	Macrosiphum sp. BOLD-2016 voucher BIOUG06422-E03 cytochrome oxidase subunit 1 (COI) gene, partial cds; mitochondrial	39.4	39.4	1	0.004	0.95	KR561825.1	313	....A................	333
1255Select seq gb|KR561816.1|	Aulacorthum sp. BOLD:AAB2572 voucher BIOUG08005-D12 cytochrome oxidase subunit 1 (COI) gene, partial cds; mitochondrial	39.4	39.4	1	0.004	0.95	KR561816.1	313	....A................	333
1256Select seq gb|KR561814.1|	Cinara brevispinosa voucher BIOUG12725-A06 cytochrome oxidase subunit 1 (COI) gene, partial cds; mitochondrial	39.4	39.4	1	0.004	0.95	KR561814.1	312	....A................	332
1257Select seq gb|KR561812.1|	Aphis sp. BOLD:AAB7937 voucher BIOUG04446-G05 cytochrome oxidase subunit 1 (COI) gene, partial cds; mitochondrial	39.4	39.4	1	0.004	0.95	KR561812.1	303	....A................	323
1258Select seq gb|KR561804.1|	Uroleucon sp. BOLD-2016 voucher BIOUG07811-H02 cytochrome oxidase subunit 1 (COI) gene, partial cds; mitochondrial	39.4	39.4	1	0.004	0.95	KR561804.1	305	....A................	325
1259Select seq gb|KR561787.1|	Macrosiphum sp. BOLD-2016 voucher BIOUG05956-E05 cytochrome oxidase subunit 1 (COI) gene, partial cds; mitochondrial	39.4	39.4	1	0.004	0.95	KR561787.1	302	....A................	322
1260Select seq gb|KR561778.1|	Aphis sp. BOLD:AAA6378 voucher BIOUG09208-A04 cytochrome oxidase subunit 1 (COI) gene, partial cds; mitochondrial	39.4	39.4	1	0.004	0.95	KR561778.1	300	....A................	320
1261Select seq gb|KR561772.1|	Rhopalosiphum sp. BOLD:AAD1504 voucher BIOUG12628-H04 cytochrome oxidase subunit 1 (COI) gene, partial cds; mitochondrial	39.4	39.4	1	0.004	0.95	KR561772.1	312	....A................	332
1262Select seq gb|KR561767.1|	Macrosiphum sp. BOLD-2016 voucher BIOUG06155-A08 cytochrome oxidase subunit 1 (COI) gene, partial cds; mitochondrial	39.4	39.4	1	0.004	0.95	KR561767.1	313	....A................	333
1263Select seq gb|KR561766.1|	Uroleucon sp. BOLD-2016 voucher BIOUG09175-A08 cytochrome oxidase subunit 1 (COI) gene, partial cds; mitochondrial	39.4	39.4	1	0.004	0.95	KR561766.1	305	....A................	325
1264Select seq gb|KR561750.1|	Protaphis middletonii voucher BIOUG06455-D07 cytochrome oxidase subunit 1 (COI) gene, partial cds; mitochondrial	39.4	39.4	1	0.004	0.95	KR561750.1	313	....A................	333
1265Select seq gb|KR561743.1|	Macrosiphum sp. BOLD-2016 voucher BIOUG00806-C06 cytochrome oxidase subunit 1 (COI) gene, partial cds; mitochondrial	39.4	39.4	1	0.004	0.95	KR561743.1	313	....A................	333
1266Select seq gb|KR561739.1|	Aphis rubicola voucher BIOUG06314-C07 cytochrome oxidase subunit 1 (COI) gene, partial cds; mitochondrial	39.4	39.4	1	0.004	0.95	KR561739.1	313	....A................	333
1267Select seq gb|KR561727.1|	Aphis glycines voucher BIOUG01595-G03 cytochrome oxidase subunit 1 (COI) gene, partial cds; mitochondrial	39.4	39.4	1	0.004	0.95	KR561727.1	313	....A................	333
1268Select seq gb|KR561713.1|	Nearctaphis bakeri voucher BIOUG16115-A11 cytochrome oxidase subunit 1 (COI) gene, partial cds; mitochondrial	39.4	39.4	1	0.004	0.95	KR561713.1	303	....A................	323
1269Select seq gb|KR561708.1|	Aphis sp. BOLD-2016 voucher BIOUG13212-G10 cytochrome oxidase subunit 1 (COI) gene, partial cds; mitochondrial	39.4	39.4	1	0.004	0.95	KR561708.1	303	....A................	323
1270Select seq gb|KR561705.1|	Macrosiphum zionense voucher 10BBCHEM-0589 cytochrome oxidase subunit 1 (COI) gene, partial cds; mitochondrial	39.4	39.4	1	0.004	0.95	KR561705.1	313	....A................	333
1271Select seq gb|KR561684.1|	Hyperomyzus sp. BOLD:AAB8566 voucher BIOUG03541-G02 cytochrome oxidase subunit 1 (COI) gene, partial cds; mitochondrial	39.4	39.4	1	0.004	0.95	KR561684.1	313	....A................	333
1272Select seq gb|KR561646.1|	Metcalfa pruinosa voucher BIOUG07033-C09 cytochrome oxidase subunit 1 (COI) gene, partial cds; mitochondrial	39.4	39.4	1	0.004	0.95	KR561646.1	219	....T................	239
1273Select seq gb|KR561638.1|	Metopolophium sp. BOLD:AAE7796 voucher BIOUG16129-B09 cytochrome oxidase subunit 1 (COI) gene, partial cds; mitochondrial	39.4	39.4	1	0.004	0.95	KR561638.1	223	....A................	243
1274Select seq gb|KR561590.1|	Macrosiphum sp. BOLD-2016 voucher BIOUG05152-E01 cytochrome oxidase subunit 1 (COI) gene, partial cds; mitochondrial	39.4	39.4	1	0.004	0.95	KR561590.1	313	....A................	333
1275Select seq gb|KR561585.1|	Macrosiphum sp. BOLD-2016 voucher BIOUG16097-B05 cytochrome oxidase subunit 1 (COI) gene, partial cds; mitochondrial	39.4	39.4	1	0.004	0.95	KR561585.1	276	....A................	296
1276Select seq gb|KR561578.1|	Macrosiphum sp. BOLD-2016 voucher BIOUG06252-H10 cytochrome oxidase subunit 1 (COI) gene, partial cds; mitochondrial	39.4	39.4	1	0.004	0.95	KR561578.1	283	....A................	303
1277Select seq gb|KR561571.1|	Metopolophium sp. BOLD:AAE7796 voucher BIOUG08599-F09 cytochrome oxidase subunit 1 (COI) gene, partial cds; mitochondrial	39.4	39.4	1	0.004	0.95	KR561571.1	303	....A................	323
1278Select seq gb|KR561555.1|	Hyperomyzus sp. BOLD:AAB8566 voucher BIOUG16161-A12 cytochrome oxidase subunit 1 (COI) gene, partial cds; mitochondrial	39.4	39.4	1	0.004	0.95	KR561555.1	300	....A................	320
1279Select seq gb|KR561551.1|	Macrosiphum sp. BOLD-2016 voucher BIOUG09174-B06 cytochrome oxidase subunit 1 (COI) gene, partial cds; mitochondrial	39.4	39.4	1	0.004	0.95	KR561551.1	313	....A................	333
1280Select seq gb|KR561539.1|	Aphididae sp. BOLD:AAG3894 voucher BIOUG14251-A04 cytochrome oxidase subunit 1 (COI) gene, partial cds; mitochondrial	39.4	39.4	1	0.004	0.95	KR561539.1	303	....A................	323
1281Select seq gb|KR561493.1|	Calaphidinae sp. BOLD-2016 voucher BIOUG03696-A06 cytochrome oxidase subunit 1 (COI) gene, partial cds; mitochondrial	39.4	39.4	1	0.004	0.95	KR561493.1	313	....A................	333
1282Select seq gb|KR561462.1|	Aphidinae sp. BOLD:AAB1787 voucher BIOUG03140-H06 cytochrome oxidase subunit 1 (COI) gene, partial cds; mitochondrial	39.4	39.4	1	0.004	0.95	KR561462.1	313	....A................	333
1283Select seq gb|KR561447.1|	Calaphidinae sp. BOLD-2016 voucher BIOUG04197-E12 cytochrome oxidase subunit 1 (COI) gene, partial cds; mitochondrial	39.4	39.4	1	0.004	0.95	KR561447.1	313	....A................	333
1284Select seq gb|KR561445.1|	Macrosiphum sp. BOLD-2016 voucher BIOUG09180-C06 cytochrome oxidase subunit 1 (COI) gene, partial cds; mitochondrial	39.4	39.4	1	0.004	0.95	KR561445.1	305	....A................	325
1285Select seq gb|KR561424.1|	Macrosiphum sp. BOLD-2016 voucher BIOUG05091-C09 cytochrome oxidase subunit 1 (COI) gene, partial cds; mitochondrial	39.4	39.4	1	0.004	0.95	KR561424.1	282	....A................	302
1286Select seq gb|KR561413.1|	Flatidae sp. BOLD:AAG4399 voucher BIOUG08805-C02 cytochrome oxidase subunit 1 (COI) gene, partial cds; mitochondrial	39.4	39.4	1	0.004	0.95	KR561413.1	277	....T................	297
1287Select seq gb|KR561411.1|	Macrosiphum sp. BOLD-2016 voucher BIOUG09173-C03 cytochrome oxidase subunit 1 (COI) gene, partial cds; mitochondrial	39.4	39.4	1	0.004	0.95	KR561411.1	313	....A................	333
1288Select seq gb|KR561390.1|	Macrosiphum sp. BOLD-2016 voucher BIOUG04446-E01 cytochrome oxidase subunit 1 (COI) gene, partial cds; mitochondrial	39.4	39.4	1	0.004	0.95	KR561390.1	276	....A................	296
1289Select seq gb|KR561380.1|	Calaphidinae sp. BOLD-2016 voucher BIOUG03696-E11 cytochrome oxidase subunit 1 (COI) gene, partial cds; mitochondrial	39.4	39.4	1	0.004	0.95	KR561380.1	313	....A................	333
1290Select seq gb|KR561369.1|	Uroleucon sp. BOLD-2016 voucher BIOUG09174-F05 cytochrome oxidase subunit 1 (COI) gene, partial cds; mitochondrial	39.4	39.4	1	0.004	0.95	KR561369.1	256	....A................	276
1291Select seq gb|KR561350.1|	Schizolachnus sp. BOLD:AAE3796 voucher BIOUG16125-C12 cytochrome oxidase subunit 1 (COI) gene, partial cds; mitochondrial	39.4	39.4	1	0.004	0.95	KR561350.1	303	....A................	323
1292Select seq gb|KR561342.1|	Aphididae sp. BOLD:AAG3894 voucher BIOUG13985-B11 cytochrome oxidase subunit 1 (COI) gene, partial cds; mitochondrial	39.4	39.4	1	0.004	0.95	KR561342.1	303	....A................	323
1293Select seq gb|KR561329.1|	Aphis sp. BOLD:AAA4183 voucher BIOUG07800-G12 cytochrome oxidase subunit 1 (COI) gene, partial cds; mitochondrial	39.4	39.4	1	0.004	0.95	KR561329.1	311	....A................	331
1294Select seq gb|KR561313.1|	Macrosiphum sp. BOLD-2016 voucher BIOUG16010-G06 cytochrome oxidase subunit 1 (COI) gene, partial cds; mitochondrial	39.4	39.4	1	0.004	0.95	KR561313.1	258	....A................	278
1295Select seq gb|KR561291.1|	Calaphidinae sp. BOLD-2016 voucher BIOUG04196-F07 cytochrome oxidase subunit 1 (COI) gene, partial cds; mitochondrial	39.4	39.4	1	0.004	0.95	KR561291.1	313	....A................	333
1296Select seq gb|KR561274.1|	Flatidae sp. BOLD:AAG4399 voucher BIOUG08805-C01 cytochrome oxidase subunit 1 (COI) gene, partial cds; mitochondrial	39.4	39.4	1	0.004	0.95	KR561274.1	279	....T................	299
1297Select seq gb|KR561258.1|	Macrosiphum sp. BOLD-2016 voucher BIOUG06251-D07 cytochrome oxidase subunit 1 (COI) gene, partial cds; mitochondrial	39.4	39.4	1	0.004	0.95	KR561258.1	304	....A................	324
1298Select seq gb|KR561252.1|	Aphididae sp. BOLD:AAC1080 voucher BIOUG13141-F01 cytochrome oxidase subunit 1 (COI) gene, partial cds; mitochondrial	39.4	39.4	1	0.004	0.95	KR561252.1	313	....A................	333
1299Select seq gb|KR561239.1|	Myzus sp. BOLD:AAB2802 voucher BIOUG16033-D02 cytochrome oxidase subunit 1 (COI) gene, partial cds; mitochondrial	39.4	39.4	1	0.004	0.95	KR561239.1	312	....A................	332
1300Select seq gb|KR561213.1|	Nasonovia ribisnigri voucher 10BBCHEM-1103 cytochrome oxidase subunit 1 (COI) gene, partial cds; mitochondrial	39.4	39.4	1	0.004	0.95	KR561213.1	246	....A................	266
1301Select seq gb|KR561196.1|	Aphididae sp. BOLD:AAB8566 voucher BIOUG08671-E04 cytochrome oxidase subunit 1 (COI) gene, partial cds; mitochondrial	39.4	39.4	1	0.004	0.95	KR561196.1	305	....A................	325
1302Select seq gb|KR561186.1|	Calaphidinae sp. BOLD-2016 voucher BIOUG03541-F10 cytochrome oxidase subunit 1 (COI) gene, partial cds; mitochondrial	39.4	39.4	1	0.004	0.95	KR561186.1	313	....A................	333
1303Select seq gb|KR561178.1|	Aphididae sp. BOLD:AAE7796 voucher BIOUG09137-G05 cytochrome oxidase subunit 1 (COI) gene, partial cds; mitochondrial	39.4	39.4	1	0.004	0.95	KR561178.1	305	....A................	325
1304Select seq gb|KR561142.1|	Calaphidinae sp. BOLD-2016 voucher BIOUG04197-E03 cytochrome oxidase subunit 1 (COI) gene, partial cds; mitochondrial	39.4	39.4	1	0.004	0.95	KR561142.1	313	....A................	333
1305Select seq gb|KR561135.1|	Hyperomyzus pallidus voucher BIOUG16099-C03 cytochrome oxidase subunit 1 (COI) gene, partial cds; mitochondrial	39.4	39.4	1	0.004	0.95	KR561135.1	312	....A................	332
1306Select seq gb|KR561132.1|	Macrosiphum sp. BOLD-2016 voucher BIOUG16010-F06 cytochrome oxidase subunit 1 (COI) gene, partial cds; mitochondrial	39.4	39.4	1	0.004	0.95	KR561132.1	303	....A................	323
1307Select seq gb|KR561117.1|	Nasonovia sp. BOLD:AAB9332 voucher BIOUG08659-E07 cytochrome oxidase subunit 1 (COI) gene, partial cds; mitochondrial	39.4	39.4	1	0.004	0.95	KR561117.1	312	....A................	332
1308Select seq gb|KR561091.1|	Macrosiphum sp. BOLD-2016 voucher BIOUG06245-E02 cytochrome oxidase subunit 1 (COI) gene, partial cds; mitochondrial	39.4	39.4	1	0.004	0.95	KR561091.1	305	....A................	325
1309Select seq gb|KR561086.1|	Flatidae sp. BOLD:AAG4399 voucher BIOUG08415-H04 cytochrome oxidase subunit 1 (COI) gene, partial cds; mitochondrial	39.4	39.4	1	0.004	0.95	KR561086.1	250	....T................	270
1310Select seq gb|KR561083.1|	Calaphidinae sp. BOLD-2016 voucher BIOUG04097-B09 cytochrome oxidase subunit 1 (COI) gene, partial cds; mitochondrial	39.4	39.4	1	0.004	0.95	KR561083.1	313	....A................	333
1311Select seq gb|KR561075.1|	Calaphidinae sp. BOLD-2016 voucher BIOUG04097-A11 cytochrome oxidase subunit 1 (COI) gene, partial cds; mitochondrial	39.4	39.4	1	0.004	0.95	KR561075.1	313	....A................	333
1312Select seq gb|KR561049.1|	Metopolophium sp. BOLD:AAE7796 voucher BIOUG09236-A07 cytochrome oxidase subunit 1 (COI) gene, partial cds; mitochondrial	39.4	39.4	1	0.004	0.95	KR561049.1	239	....A................	259
1313Select seq gb|KR561024.1|	Macrosiphum pseudocoryli voucher BIOUG05092-B07 cytochrome oxidase subunit 1 (COI) gene, partial cds; mitochondrial	39.4	39.4	1	0.004	0.95	KR561024.1	99	....A................	119
1314Select seq gb|KR561015.1|	Macrosiphum sp. BOLD-2016 voucher BIOUG06422-H04 cytochrome oxidase subunit 1 (COI) gene, partial cds; mitochondrial	39.4	39.4	1	0.004	0.95	KR561015.1	313	....A................	333
1315Select seq gb|KR561012.1|	Aphis nerii voucher BIOUG16087-A07 cytochrome oxidase subunit 1 (COI) gene, partial cds; mitochondrial	39.4	39.4	1	0.004	0.95	KR561012.1	288	....A................	308
1316Select seq gb|KR561009.1|	Aphis pentstemonicola voucher BIOUG06939-F02 cytochrome oxidase subunit 1 (COI) gene, partial cds; mitochondrial	39.4	39.4	1	0.004	0.95	KR561009.1	311	....A................	331
1317Select seq gb|KR560996.1|	Macrosiphum sp. BOLD-2016 voucher BIOUG16056-F03 cytochrome oxidase subunit 1 (COI) gene, partial cds; mitochondrial	39.4	39.4	1	0.004	0.95	KR560996.1	303	....A................	323
1318Select seq gb|KR560988.1|	Uroleucon sp. BOLD:AAF8501 voucher BIOUG07898-D05 cytochrome oxidase subunit 1 (COI) gene, partial cds; mitochondrial	39.4	39.4	1	0.004	0.95	KR560988.1	303	....A................	323
1319Select seq gb|KR560974.1|	Aphis sp. BOLD:AAA6378 voucher BIOUG04470-E10 cytochrome oxidase subunit 1 (COI) gene, partial cds; mitochondrial	39.4	39.4	1	0.004	0.95	KR560974.1	313	....A................	333
1320Select seq gb|KR560961.1|	Calaphidinae sp. BOLD-2016 voucher BIOUG03158-H11 cytochrome oxidase subunit 1 (COI) gene, partial cds; mitochondrial	39.4	39.4	1	0.004	0.95	KR560961.1	313	....A................	333
1321Select seq gb|KR560943.1|	Macrosiphum sp. BOLD-2016 voucher BIOUG06641-B09 cytochrome oxidase subunit 1 (COI) gene, partial cds; mitochondrial	39.4	39.4	1	0.004	0.95	KR560943.1	305	....A................	325
1322Select seq gb|KR560921.1|	Macrosiphum sp. BOLD-2016 voucher BIOUG09180-C07 cytochrome oxidase subunit 1 (COI) gene, partial cds; mitochondrial	39.4	39.4	1	0.004	0.95	KR560921.1	296	....A................	316
1323Select seq gb|KR560913.1|	Schizaphis graminum voucher BIOUG07212-E02 cytochrome oxidase subunit 1 (COI) gene, partial cds; mitochondrial	39.4	39.4	1	0.004	0.95	KR560913.1	305	....A................	325
1324Select seq gb|KR560904.1|	Aphididae sp. BOLD:AAI3917 voucher BIOUG08323-G11 cytochrome oxidase subunit 1 (COI) gene, partial cds; mitochondrial	39.4	39.4	1	0.004	0.95	KR560904.1	313	....A................	333
1325Select seq gb|KR560880.1|	Rhopalosiphum nymphaeae voucher BIOUG16057-B07 cytochrome oxidase subunit 1 (COI) gene, partial cds; mitochondrial	39.4	39.4	1	0.004	0.95	KR560880.1	303	....A................	323
1326Select seq gb|KR560871.1|	Cavariella sp. BOLD:AAC6115 voucher BIOUG06660-H08 cytochrome oxidase subunit 1 (COI) gene, partial cds; mitochondrial	39.4	39.4	1	0.004	0.95	KR560871.1	303	....A................	323
1327Select seq gb|KR560870.1|	Macrosiphum sp. BOLD-2016 voucher BIOUG05090-G08 cytochrome oxidase subunit 1 (COI) gene, partial cds; mitochondrial	39.4	39.4	1	0.004	0.95	KR560870.1	261	....A................	281
1328Select seq gb|KR560840.1|	Uroleucon sp. BOLD-2016 voucher BIOUG07279-F02 cytochrome oxidase subunit 1 (COI) gene, partial cds; mitochondrial	39.4	39.4	1	0.004	0.95	KR560840.1	313	....A................	333
1329Select seq gb|KR560827.1|	Illinoia sp. BOLD-2016 voucher BIOUG09300-G12 cytochrome oxidase subunit 1 (COI) gene, partial cds; mitochondrial	39.4	39.4	1	0.004	0.95	KR560827.1	313	....A................	333
1330Select seq gb|KR560810.1|	Calaphidinae sp. BOLD-2016 voucher BIOUG03360-F09 cytochrome oxidase subunit 1 (COI) gene, partial cds; mitochondrial	39.4	39.4	1	0.004	0.95	KR560810.1	313	....A................	333
1331Select seq gb|KR560785.1|	Uroleucon sp. BOLD-2016 voucher BIOUG08862-G04 cytochrome oxidase subunit 1 (COI) gene, partial cds; mitochondrial	39.4	39.4	1	0.004	0.95	KR560785.1	305	....A................	325
1332Select seq gb|KR560769.1|	Uroleucon sp. BOLD-2016 voucher BIOUG09178-B01 cytochrome oxidase subunit 1 (COI) gene, partial cds; mitochondrial	39.4	39.4	1	0.004	0.95	KR560769.1	300	....A................	320
1333Select seq gb|KR560766.1|	Aphididae sp. BOLD:AAB1787 voucher BIOUG14258-H09 cytochrome oxidase subunit 1 (COI) gene, partial cds; mitochondrial	39.4	39.4	1	0.004	0.95	KR560766.1	303	....A................	323
1334Select seq gb|KR560763.1|	Chaetosiphon sp. BOLD-2016 voucher BIOUG07321-G02 cytochrome oxidase subunit 1 (COI) gene, partial cds; mitochondrial	39.4	39.4	1	0.004	0.95	KR560763.1	305	....A................	325
1335Select seq gb|KR560762.1|	Hyperomyzus picridis voucher BIOUG16008-C10 cytochrome oxidase subunit 1 (COI) gene, partial cds; mitochondrial	39.4	39.4	1	0.004	0.95	KR560762.1	303	....A................	323
1336Select seq gb|KR560756.1|	Myzus sp. BOLD:AAB2802 voucher BIOUG06661-B11 cytochrome oxidase subunit 1 (COI) gene, partial cds; mitochondrial	39.4	39.4	1	0.004	0.95	KR560756.1	303	....A................	323
1337Select seq gb|KR560729.1|	Hayhurstia atriplicis voucher BIOUG16094-D12 cytochrome oxidase subunit 1 (COI) gene, partial cds; mitochondrial	39.4	39.4	1	0.004	0.95	KR560729.1	300	....A................	320
1338Select seq gb|KR560718.1|	Calaphidinae sp. BOLD-2016 voucher BIOUG04097-A07 cytochrome oxidase subunit 1 (COI) gene, partial cds; mitochondrial	39.4	39.4	1	0.004	0.95	KR560718.1	313	....A................	333
1339Select seq gb|KR560669.1|	Calaphidinae sp. BOLD-2016 voucher BIOUG03696-B04 cytochrome oxidase subunit 1 (COI) gene, partial cds; mitochondrial	39.4	39.4	1	0.004	0.95	KR560669.1	189	....A................	209
1340Select seq gb|KR560659.1|	Aphididae sp. BOLD:AAA4183 voucher BIOUG08415-G07 cytochrome oxidase subunit 1 (COI) gene, partial cds; mitochondrial	39.4	39.4	1	0.004	0.95	KR560659.1	305	....A................	325
1341Select seq gb|KR560641.1|	Macrosiphum sp. BOLD-2016 voucher BIOUG09178-G03 cytochrome oxidase subunit 1 (COI) gene, partial cds; mitochondrial	39.4	39.4	1	0.004	0.95	KR560641.1	304	....A................	324
1342Select seq gb|KR560602.1|	Aphis nerii voucher BIOUG16150-B09 cytochrome oxidase subunit 1 (COI) gene, partial cds; mitochondrial	39.4	39.4	1	0.004	0.95	KR560602.1	312	....A................	332
1343Select seq gb|KR560599.1|	Aphididae sp. BOLD:AAD6640 voucher BIOUG13754-H02 cytochrome oxidase subunit 1 (COI) gene, partial cds; mitochondrial	39.4	39.4	1	0.004	0.95	KR560599.1	181	....A................	201
1344Select seq gb|KR560530.1|	Rhopalosiphum nymphaeae voucher BIOUG16133-H02 cytochrome oxidase subunit 1 (COI) gene, partial cds; mitochondrial	39.4	39.4	1	0.004	0.95	KR560530.1	312	....A................	332
1345Select seq gb|KR560528.1|	Chaitophorus nigrae voucher BIOUG07100-C10 cytochrome oxidase subunit 1 (COI) gene, partial cds; mitochondrial	39.4	39.4	1	0.004	0.95	KR560528.1	305	....A................	325
1346Select seq gb|KR560523.1|	Aphididae sp. BOLD:AAF4380 voucher BIOUG12622-H11 cytochrome oxidase subunit 1 (COI) gene, partial cds; mitochondrial	39.4	39.4	1	0.004	0.95	KR560523.1	303	....A................	323
1347Select seq gb|KR560519.1|	Macrosiphum sp. BOLD-2016 voucher BIOUG05090-D10 cytochrome oxidase subunit 1 (COI) gene, partial cds; mitochondrial	39.4	39.4	1	0.004	0.95	KR560519.1	303	....A................	323
1348Select seq gb|KR560496.1|	Myzus hemerocallis voucher BIOUG16045-B12 cytochrome oxidase subunit 1 (COI) gene, partial cds; mitochondrial	39.4	39.4	1	0.004	0.95	KR560496.1	313	....A................	333
1349Select seq gb|KR560457.1|	Aphis glycines voucher BIOUG16088-G10 cytochrome oxidase subunit 1 (COI) gene, partial cds; mitochondrial	39.4	39.4	1	0.004	0.95	KR560457.1	303	....A................	323
1350Select seq gb|KR560452.1|	Calaphidinae sp. BOLD-2016 voucher BIOUG04197-G12 cytochrome oxidase subunit 1 (COI) gene, partial cds; mitochondrial	39.4	39.4	1	0.004	0.95	KR560452.1	313	....A................	333
1351Select seq gb|KR560425.1|	Chaitophorus sp. BOLD-2016 voucher BIOUG13412-G11 cytochrome oxidase subunit 1 (COI) gene, partial cds; mitochondrial	39.4	39.4	1	0.004	0.95	KR560425.1	309	....A................	329
1352Select seq gb|KR560403.1|	Cinara pruinosa voucher BIOUG16125-B05 cytochrome oxidase subunit 1 (COI) gene, partial cds; mitochondrial	39.4	39.4	1	0.004	0.95	KR560403.1	303	....A................	323
1353Select seq gb|KR560353.1|	Calaphidinae sp. BOLD-2016 voucher BIOUG04197-E05 cytochrome oxidase subunit 1 (COI) gene, partial cds; mitochondrial	39.4	39.4	1	0.004	0.95	KR560353.1	313	....A................	333
1354Select seq gb|KR560352.1|	Macrosiphum sp. BOLD-2016 voucher BIOUG06358-D02 cytochrome oxidase subunit 1 (COI) gene, partial cds; mitochondrial	39.4	39.4	1	0.004	0.95	KR560352.1	305	....A................	325
1355Select seq gb|KR560345.1|	Calaphidinae sp. BOLD-2016 voucher BIOUG04197-B05 cytochrome oxidase subunit 1 (COI) gene, partial cds; mitochondrial	39.4	39.4	1	0.004	0.95	KR560345.1	313	....A................	333
1356Select seq gb|KR560302.1|	Callipterinella sp. BOLD-2016 voucher BIOUG16131-F12 cytochrome oxidase subunit 1 (COI) gene, partial cds; mitochondrial	39.4	39.4	1	0.004	0.95	KR560302.1	294	....A................	314
1357Select seq gb|KR560299.1|	Myzus sp. BOLD:AAB2802 voucher BIOUG04107-D02 cytochrome oxidase subunit 1 (COI) gene, partial cds; mitochondrial	39.4	39.4	1	0.004	0.95	KR560299.1	313	....A................	333
1358Select seq gb|KR560294.1|	Calaphidinae sp. BOLD-2016 voucher BIOUG08425-E03 cytochrome oxidase subunit 1 (COI) gene, partial cds; mitochondrial	39.4	39.4	1	0.004	0.95	KR560294.1	312	....A................	332
1359Select seq gb|KR560286.1|	Uroleucon sp. BOLD-2016 voucher BIOUG09177-A05 cytochrome oxidase subunit 1 (COI) gene, partial cds; mitochondrial	39.4	39.4	1	0.004	0.95	KR560286.1	296	....A................	316
1360Select seq gb|KR560280.1|	Calaphidinae sp. BOLD-2016 voucher BIOUG03852-H06 cytochrome oxidase subunit 1 (COI) gene, partial cds; mitochondrial	39.4	39.4	1	0.004	0.95	KR560280.1	313	....A................	333
1361Select seq gb|KR560253.1|	Macrosiphum sp. BOLD-2016 voucher BIOUG16129-C05 cytochrome oxidase subunit 1 (COI) gene, partial cds; mitochondrial	39.4	39.4	1	0.004	0.95	KR560253.1	312	....A................	332
1362Select seq gb|KR560243.1|	Macrosiphum sp. BOLD-2016 voucher BIOUG09177-A12 cytochrome oxidase subunit 1 (COI) gene, partial cds; mitochondrial	39.4	39.4	1	0.004	0.95	KR560243.1	313	....A................	333
1363Select seq gb|KR560205.1|	Calaphidinae sp. BOLD-2016 voucher BIOUG03852-F03 cytochrome oxidase subunit 1 (COI) gene, partial cds; mitochondrial	39.4	39.4	1	0.004	0.95	KR560205.1	313	....A................	333
1364Select seq gb|KR560204.1|	Metcalfa pruinosa voucher BIOUG08598-D06 cytochrome oxidase subunit 1 (COI) gene, partial cds; mitochondrial	39.4	39.4	1	0.004	0.95	KR560204.1	231	....T................	251
1365Select seq gb|KR560203.1|	Rhopalomyzus sp. BOLD-2016 voucher BIOUG16094-H06 cytochrome oxidase subunit 1 (COI) gene, partial cds; mitochondrial	39.4	39.4	1	0.004	0.95	KR560203.1	303	....A................	323
1366Select seq gb|KR560199.1|	Macrosiphum sp. BOLD-2016 voucher BIOUG09176-H03 cytochrome oxidase subunit 1 (COI) gene, partial cds; mitochondrial	39.4	39.4	1	0.004	0.95	KR560199.1	304	....A................	324
1367Select seq gb|KR560190.1|	Cavariella sp. BOLD:AAC6115 voucher BIOUG06311-F12 cytochrome oxidase subunit 1 (COI) gene, partial cds; mitochondrial	39.4	39.4	1	0.004	0.95	KR560190.1	305	....A................	325
1368Select seq gb|KR560172.1|	Macrosiphum sp. BOLD-2016 voucher BIOUG06155-A06 cytochrome oxidase subunit 1 (COI) gene, partial cds; mitochondrial	39.4	39.4	1	0.004	0.95	KR560172.1	313	....A................	333
1369Select seq gb|KR560163.1|	Callipterinella sp. BOLD-2016 voucher BIOUG16131-C10 cytochrome oxidase subunit 1 (COI) gene, partial cds; mitochondrial	39.4	39.4	1	0.004	0.95	KR560163.1	309	....A................	329
1370Select seq gb|KR560159.1|	Aphididae sp. BOLD:AAG3894 voucher BIOUG14251-C05 cytochrome oxidase subunit 1 (COI) gene, partial cds; mitochondrial	39.4	39.4	1	0.004	0.95	KR560159.1	303	....A................	323
1371Select seq gb|KR560155.1|	Nearctaphis bakeri voucher BIOUG16131-D06 cytochrome oxidase subunit 1 (COI) gene, partial cds; mitochondrial	39.4	39.4	1	0.004	0.95	KR560155.1	261	....A................	281
1372Select seq gb|KR560122.1|	Metopolophium sp. BOLD:AAE7796 voucher BIOUG16125-C10 cytochrome oxidase subunit 1 (COI) gene, partial cds; mitochondrial	39.4	39.4	1	0.004	0.95	KR560122.1	223	....A................	243
1373Select seq gb|KR560120.1|	Rhopalosiphum oxyacanthae voucher BIOUG05669-B09 cytochrome oxidase subunit 1 (COI) gene, partial cds; mitochondrial	39.4	39.4	1	0.004	0.95	KR560120.1	312	....A................	332
1374Select seq gb|KR560091.1|	Aphididae sp. BOLD:AAC3672 voucher BIOUG08325-E11 cytochrome oxidase subunit 1 (COI) gene, partial cds; mitochondrial	39.4	39.4	1	0.004	0.95	KR560091.1	313	....A................	333
1375Select seq gb|KR560080.1|	Rhopalosiphum sp. BOLD:AAD1504 voucher BIOUG16130-C01 cytochrome oxidase subunit 1 (COI) gene, partial cds; mitochondrial	39.4	39.4	1	0.004	0.95	KR560080.1	312	....A................	332
1376Select seq gb|KR560079.1|	Macrosiphum sp. BOLD-2016 voucher BIOUG08498-B11 cytochrome oxidase subunit 1 (COI) gene, partial cds; mitochondrial	39.4	39.4	1	0.004	0.95	KR560079.1	312	....A................	332
1377Select seq gb|KT175584.1|	Myzus persicae voucher GB744215 cytochrome oxidase subunit 1 (COI) gene, partial cds; mitochondrial	39.4	39.4	1	0.004	0.95	KT175584.1	302	....A................	322
1378Select seq gb|KR572355.1|	Metopolophium sp. BOLD:AAE7796 voucher BIOUG08709-E11 cytochrome oxidase subunit 1 (COI) gene, partial cds; mitochondrial	39.4	39.4	1	0.004	0.95	KR572355.1	303	....A................	323
1379Select seq gb|KR572343.1|	Acyrthosiphon sp. BOLD:AAB1787 voucher BIOUG16087-A04 cytochrome oxidase subunit 1 (COI) gene, partial cds; mitochondrial	39.4	39.4	1	0.004	0.95	KR572343.1	303	....A................	323
1380Select seq gb|KR572340.1|	Uroleucon sp. BOLD-2016 voucher BIOUG07661-H07 cytochrome oxidase subunit 1 (COI) gene, partial cds; mitochondrial	39.4	39.4	1	0.004	0.95	KR572340.1	312	....A................	332
1381Select seq gb|KR572316.1|	Hyperomyzus pallidus voucher BIOUG16129-A10 cytochrome oxidase subunit 1 (COI) gene, partial cds; mitochondrial	39.4	39.4	1	0.004	0.95	KR572316.1	312	....A................	332
1382Select seq gb|KR572303.1|	Nearctaphis sp. BOLD-2016 voucher BIOUG05956-E04 cytochrome oxidase subunit 1 (COI) gene, partial cds; mitochondrial	39.4	39.4	1	0.004	0.95	KR572303.1	305	....A................	325
1383Select seq gb|KR572284.1|	Macrosiphum sp. BOLD-2016 voucher BIOUG06155-C10 cytochrome oxidase subunit 1 (COI) gene, partial cds; mitochondrial	39.4	39.4	1	0.004	0.95	KR572284.1	305	....A................	325
1384Select seq gb|KR572281.1|	Calaphidinae sp. BOLD-2016 voucher BIOUG03360-F02 cytochrome oxidase subunit 1 (COI) gene, partial cds; mitochondrial	39.4	39.4	1	0.004	0.95	KR572281.1	313	....A................	333
1385Select seq gb|KR572280.1|	Macrosiphum sp. BOLD-2016 voucher BIOUG09236-C11 cytochrome oxidase subunit 1 (COI) gene, partial cds; mitochondrial	39.4	39.4	1	0.004	0.95	KR572280.1	305	....A................	325
1386Select seq gb|KR572276.1|	Macrosiphum sp. BOLD-2016 voucher BIOUG05834-G09 cytochrome oxidase subunit 1 (COI) gene, partial cds; mitochondrial	39.4	39.4	1	0.004	0.95	KR572276.1	303	....A................	323
1387Select seq gb|KR572251.1|	Hyperomyzus picridis voucher BIOUG16007-H11 cytochrome oxidase subunit 1 (COI) gene, partial cds; mitochondrial	39.4	39.4	1	0.004	0.95	KR572251.1	303	....A................	323
1388Select seq gb|KR572242.1|	Schizolachnus sp. BOLD:AAE3796 voucher BIOUG16134-H08 cytochrome oxidase subunit 1 (COI) gene, partial cds; mitochondrial	39.4	39.4	1	0.004	0.95	KR572242.1	300	....A................	320
1389Select seq gb|KR572229.1|	Uroleucon sp. BOLD-2016 voucher BIOUG09176-F01 cytochrome oxidase subunit 1 (COI) gene, partial cds; mitochondrial	39.4	39.4	1	0.004	0.95	KR572229.1	302	....A................	322
1390Select seq gb|KR572197.1|	Illinoia sp. BOLD-2016 voucher BIOUG17682-F09 cytochrome oxidase subunit 1 (COI) gene, partial cds; mitochondrial	39.4	39.4	1	0.004	0.95	KR572197.1	303	....A................	323
1391Select seq gb|KR572196.1|	Mindarus sp. 1 CF-2009 voucher BIOUG05872-E06 cytochrome oxidase subunit 1 (COI) gene, partial cds; mitochondrial	39.4	39.4	1	0.004	0.95	KR572196.1	313	....A................	333
1392Select seq gb|KR572184.1|	Macrosiphum sp. BOLD-2016 voucher BIOUG05956-E01 cytochrome oxidase subunit 1 (COI) gene, partial cds; mitochondrial	39.4	39.4	1	0.004	0.95	KR572184.1	304	....A................	324
1393Select seq gb|KR572162.1|	Schizaphis graminum voucher BIOUG01607-C09 cytochrome oxidase subunit 1 (COI) gene, partial cds; mitochondrial	39.4	39.4	1	0.004	0.95	KR572162.1	313	....A................	333
1394Select seq gb|KR572151.1|	Macrosiphum sp. BOLD-2016 voucher BIOUG06637-A07 cytochrome oxidase subunit 1 (COI) gene, partial cds; mitochondrial	39.4	39.4	1	0.004	0.95	KR572151.1	313	....A................	333
1395Select seq gb|KR572113.1|	Aphis sp. BOLD:AAC7705 voucher BIOUG08112-D05 cytochrome oxidase subunit 1 (COI) gene, partial cds; mitochondrial	39.4	39.4	1	0.004	0.95	KR572113.1	312	....A................	332
1396Select seq gb|KR572109.1|	Macrosiphum sp. BOLD-2016 voucher BIOUG09178-D10 cytochrome oxidase subunit 1 (COI) gene, partial cds; mitochondrial	39.4	39.4	1	0.004	0.95	KR572109.1	305	....A................	325
1397Select seq gb|KR572108.1|	Metopolophium sp. BOLD:AAE7796 voucher BIOUG16097-C03 cytochrome oxidase subunit 1 (COI) gene, partial cds; mitochondrial	39.4	39.4	1	0.004	0.95	KR572108.1	171	....A................	191
1398Select seq gb|KR572069.1|	Aphididae sp. BOLD:AAF4380 voucher BIOUG13141-A01 cytochrome oxidase subunit 1 (COI) gene, partial cds; mitochondrial	39.4	39.4	1	0.004	0.95	KR572069.1	313	....A................	333
1399Select seq gb|KR572038.1|	Monellia sp. BOLD-2016 voucher BIOUG02749-B09 cytochrome oxidase subunit 1 (COI) gene, partial cds; mitochondrial	39.4	39.4	1	0.004	0.95	KR572038.1	313	....A................	333
1400Select seq gb|KR572024.1|	Chaetosiphon sp. BOLD-2016 voucher BIOUG04616-B09 cytochrome oxidase subunit 1 (COI) gene, partial cds; mitochondrial	39.4	39.4	1	0.004	0.95	KR572024.1	313	....A................	333
1401Select seq gb|KR572005.1|	Macrosiphum zionense voucher BIOUG09237-F07 cytochrome oxidase subunit 1 (COI) gene, partial cds; mitochondrial	39.4	39.4	1	0.004	0.95	KR572005.1	305	....A................	325
1402Select seq gb|KR572000.1|	Flatidae sp. BOLD:AAG4399 voucher BIOUG08415-H05 cytochrome oxidase subunit 1 (COI) gene, partial cds; mitochondrial	39.4	39.4	1	0.004	0.95	KR572000.1	280	....T................	300
1403Select seq gb|KR571991.1|	Macrosiphum sp. BOLD-2016 voucher BIOUG06252-G12 cytochrome oxidase subunit 1 (COI) gene, partial cds; mitochondrial	39.4	39.4	1	0.004	0.95	KR571991.1	305	....A................	325
1404Select seq gb|KR571956.1|	Macrosiphum sp. BOLD-2016 voucher BIOUG09300-D05 cytochrome oxidase subunit 1 (COI) gene, partial cds; mitochondrial	39.4	39.4	1	0.004	0.95	KR571956.1	313	....A................	333
1405Select seq gb|KR571952.1|	Macrosiphum sp. BOLD-2016 voucher BIOUG09173-B10 cytochrome oxidase subunit 1 (COI) gene, partial cds; mitochondrial	39.4	39.4	1	0.004	0.95	KR571952.1	304	....A................	324
1406Select seq gb|KR571949.1|	Aphidinae sp. BOLD:AAB1787 voucher BIOUG02739-E12 cytochrome oxidase subunit 1 (COI) gene, partial cds; mitochondrial	39.4	39.4	1	0.004	0.95	KR571949.1	313	....A................	333
1407Select seq gb|KR571948.1|	Calaphidinae sp. BOLD-2016 voucher BIOUG04196-C03 cytochrome oxidase subunit 1 (COI) gene, partial cds; mitochondrial	39.4	39.4	1	0.004	0.95	KR571948.1	313	....A................	333
1408Select seq gb|KR571946.1|	Nearctaphis bakeri voucher BIOUG07130-G11 cytochrome oxidase subunit 1 (COI) gene, partial cds; mitochondrial	39.4	39.4	1	0.004	0.95	KR571946.1	313	....A................	333
1409Select seq gb|KR571940.1|	Macrosiphum sp. BOLD-2016 voucher BIOUG09178-C08 cytochrome oxidase subunit 1 (COI) gene, partial cds; mitochondrial	39.4	39.4	1	0.004	0.95	KR571940.1	313	....A................	333
1410Select seq gb|KR571918.1|	Myzus hemerocallis voucher BIOUG16045-F07 cytochrome oxidase subunit 1 (COI) gene, partial cds; mitochondrial	39.4	39.4	1	0.004	0.95	KR571918.1	312	....A................	332
1411Select seq gb|KR571851.1|	Calaphidinae sp. BOLD-2016 voucher BIOUG03696-G10 cytochrome oxidase subunit 1 (COI) gene, partial cds; mitochondrial	39.4	39.4	1	0.004	0.95	KR571851.1	313	....A................	333
1412Select seq gb|KR571782.1|	Illinoia sp. BOLD-2016 voucher BIOUG09178-C04 cytochrome oxidase subunit 1 (COI) gene, partial cds; mitochondrial	39.4	39.4	1	0.004	0.95	KR571782.1	305	....A................	325
1413Select seq gb|KR571763.1|	Brachycaudus sp. BOLD:AAC1165 voucher BIOUG16130-G09 cytochrome oxidase subunit 1 (COI) gene, partial cds; mitochondrial	39.4	39.4	1	0.004	0.95	KR571763.1	312	....A................	332
1414Select seq gb|KR571755.1|	Aphididae sp. BOLD:AAD1504 voucher BIOUG09137-B09 cytochrome oxidase subunit 1 (COI) gene, partial cds; mitochondrial	39.4	39.4	1	0.004	0.95	KR571755.1	305	....A................	325
1415Select seq gb|KR571747.1|	Macrosiphum sp. BOLD-2016 voucher BIOUG05956-A03 cytochrome oxidase subunit 1 (COI) gene, partial cds; mitochondrial	39.4	39.4	1	0.004	0.95	KR571747.1	305	....A................	325
1416Select seq gb|KR571741.1|	Calaphidinae sp. BOLD-2016 voucher BIOUG04225-B02 cytochrome oxidase subunit 1 (COI) gene, partial cds; mitochondrial	39.4	39.4	1	0.004	0.95	KR571741.1	313	....A................	333
1417Select seq gb|KR571739.1|	Macrosiphum sp. BOLD-2016 voucher BIOUG07932-H11 cytochrome oxidase subunit 1 (COI) gene, partial cds; mitochondrial	39.4	39.4	1	0.004	0.95	KR571739.1	303	....A................	323
1418Select seq gb|KR571718.1|	Calaphidinae sp. BOLD-2016 voucher BIOUG03696-H06 cytochrome oxidase subunit 1 (COI) gene, partial cds; mitochondrial	39.4	39.4	1	0.004	0.95	KR571718.1	313	....A................	333
1419Select seq gb|KR571708.1|	Macrosiphum sp. BOLD-2016 voucher BIOUG09179-D08 cytochrome oxidase subunit 1 (COI) gene, partial cds; mitochondrial	39.4	39.4	1	0.004	0.95	KR571708.1	313	....A................	333
1420Select seq gb|KR571696.1|	Illinoia sp. BOLD-2016 voucher BIOUG09236-H01 cytochrome oxidase subunit 1 (COI) gene, partial cds; mitochondrial	39.4	39.4	1	0.004	0.95	KR571696.1	305	....A................	325
1421Select seq gb|KR571675.1|	Flatidae sp. BOLD:AAG4399 voucher BIOUG08805-B02 cytochrome oxidase subunit 1 (COI) gene, partial cds; mitochondrial	39.4	39.4	1	0.004	0.95	KR571675.1	253	....T................	273
1422Select seq gb|KR571666.1|	Hyperomyzus pallidus voucher BIOUG07800-F08 cytochrome oxidase subunit 1 (COI) gene, partial cds; mitochondrial	39.4	39.4	1	0.004	0.95	KR571666.1	305	....A................	325
1423Select seq gb|KR571650.1|	Macrosiphum sp. BOLD-2016 voucher BIOUG13141-B04 cytochrome oxidase subunit 1 (COI) gene, partial cds; mitochondrial	39.4	39.4	1	0.004	0.95	KR571650.1	313	....A................	333
1424Select seq gb|KR571606.1|	Macrosiphoniella millefolii voucher BIOUG14661-B12 cytochrome oxidase subunit 1 (COI) gene, partial cds; mitochondrial	39.4	39.4	1	0.004	0.95	KR571606.1	303	....A................	323
1425Select seq gb|KR571570.1|	Uroleucon sp. BOLD-2016 voucher BIOUG04396-D12 cytochrome oxidase subunit 1 (COI) gene, partial cds; mitochondrial	39.4	39.4	1	0.004	0.95	KR571570.1	313	....A................	333
1426Select seq gb|KR571560.1|	Macrosiphum sp. BOLD-2016 voucher BIOUG06245-E04 cytochrome oxidase subunit 1 (COI) gene, partial cds; mitochondrial	39.4	39.4	1	0.004	0.95	KR571560.1	305	....A................	325
1427Select seq gb|KR571552.1|	Macrosiphum sp. BOLD-2016 voucher BIOUG08388-H11 cytochrome oxidase subunit 1 (COI) gene, partial cds; mitochondrial	39.4	39.4	1	0.004	0.95	KR571552.1	303	....A................	323
1428Select seq gb|KR571511.1|	Aphidinae sp. BOLD-2016 voucher BIOUG14005-A12 cytochrome oxidase subunit 1 (COI) gene, partial cds; mitochondrial	39.4	39.4	1	0.004	0.95	KR571511.1	292	....A................	312
1429Select seq gb|KR571492.1|	Aphididae sp. BOLD:AAF7621 voucher BIOUG14011-D01 cytochrome oxidase subunit 1 (COI) gene, partial cds; mitochondrial	39.4	39.4	1	0.004	0.95	KR571492.1	312	....A................	332
1430Select seq gb|KR571457.1|	Calaphidinae sp. BOLD-2016 voucher BIOUG04197-D04 cytochrome oxidase subunit 1 (COI) gene, partial cds; mitochondrial	39.4	39.4	1	0.004	0.95	KR571457.1	313	....A................	333
1431Select seq gb|KR571451.1|	Macrosiphum sp. BOLD-2016 voucher BIOUG07501-D12 cytochrome oxidase subunit 1 (COI) gene, partial cds; mitochondrial	39.4	39.4	1	0.004	0.95	KR571451.1	313	....A................	333
1432Select seq gb|KR571442.1|	Aphididae sp. BOLD:ACE5126 voucher BIOUG13141-C03 cytochrome oxidase subunit 1 (COI) gene, partial cds; mitochondrial	39.4	39.4	1	0.004	0.95	KR571442.1	313	....A................	333
1433Select seq gb|KR571438.1|	Macrosiphum sp. BOLD-2016 voucher BIOUG09178-F06 cytochrome oxidase subunit 1 (COI) gene, partial cds; mitochondrial	39.4	39.4	1	0.004	0.95	KR571438.1	247	....A................	267
1434Select seq gb|KR571434.1|	Macrosiphum sp. BOLD-2016 voucher BIOUG09178-G09 cytochrome oxidase subunit 1 (COI) gene, partial cds; mitochondrial	39.4	39.4	1	0.004	0.95	KR571434.1	305	....A................	325
1435Select seq gb|KR571426.1|	Macrosiphum sp. BOLD-2016 voucher BIOUG06422-B11 cytochrome oxidase subunit 1 (COI) gene, partial cds; mitochondrial	39.4	39.4	1	0.004	0.95	KR571426.1	305	....A................	325
1436Select seq gb|KR571408.1|	Metcalfa pruinosa voucher HLC-17480 cytochrome oxidase subunit 1 (COI) gene, partial cds; mitochondrial	39.4	39.4	1	0.004	0.95	KR571408.1	31	....T................	51
1437Select seq gb|KR571399.1|	Calaphidinae sp. BOLD-2016 voucher BIOUG03541-A04 cytochrome oxidase subunit 1 (COI) gene, partial cds; mitochondrial	39.4	39.4	1	0.004	0.95	KR571399.1	313	....A................	333
1438Select seq gb|KR571395.1|	Uroleucon sp. BOLD-2016 voucher BIOUG09180-G04 cytochrome oxidase subunit 1 (COI) gene, partial cds; mitochondrial	39.4	39.4	1	0.004	0.95	KR571395.1	300	....A................	320
1439Select seq gb|KR571378.1|	Illinoia sp. BOLD-2016 voucher BIOUG17682-G02 cytochrome oxidase subunit 1 (COI) gene, partial cds; mitochondrial	39.4	39.4	1	0.004	0.95	KR571378.1	303	....A................	323
1440Select seq gb|KR571352.1|	Metcalfa pruinosa voucher BIOUG00856-G04 cytochrome oxidase subunit 1 (COI) gene, partial cds; mitochondrial	39.4	39.4	1	0.004	0.95	KR571352.1	84	....T................	104
1441Select seq gb|KR571326.1|	Calaphidinae sp. BOLD-2016 voucher BIOUG04197-G11 cytochrome oxidase subunit 1 (COI) gene, partial cds; mitochondrial	39.4	39.4	1	0.004	0.95	KR571326.1	313	....A................	333
1442Select seq gb|KR571323.1|	Macrosiphum sp. BOLD-2016 voucher BIOUG09179-B01 cytochrome oxidase subunit 1 (COI) gene, partial cds; mitochondrial	39.4	39.4	1	0.004	0.95	KR571323.1	279	....A................	299
1443Select seq gb|KR571305.1|	Macrosiphum sp. BOLD-2016 voucher BIOUG07700-A09 cytochrome oxidase subunit 1 (COI) gene, partial cds; mitochondrial	39.4	39.4	1	0.004	0.95	KR571305.1	313	....A................	333
1444Select seq gb|KR571302.1|	Calaphidinae sp. BOLD-2016 voucher BIOUG04196-C02 cytochrome oxidase subunit 1 (COI) gene, partial cds; mitochondrial	39.4	39.4	1	0.004	0.95	KR571302.1	313	....A................	333
1445Select seq gb|KR571287.1|	Aphidinae sp. BOLD-2016 voucher BIOUG14005-G02 cytochrome oxidase subunit 1 (COI) gene, partial cds; mitochondrial	39.4	39.4	1	0.004	0.95	KR571287.1	292	....A................	312
1446Select seq gb|KR571279.1|	Calaphidinae sp. BOLD-2016 voucher BIOUG03158-G10 cytochrome oxidase subunit 1 (COI) gene, partial cds; mitochondrial	39.4	39.4	1	0.004	0.95	KR571279.1	313	....A................	333
1447Select seq gb|KR571230.1|	Aphis nerii voucher BIOUG08646-C07 cytochrome oxidase subunit 1 (COI) gene, partial cds; mitochondrial	39.4	39.4	1	0.004	0.95	KR571230.1	312	....A................	332
1448Select seq gb|KR571221.1|	Myzaphis rosarum voucher BIOUG16115-A08 cytochrome oxidase subunit 1 (COI) gene, partial cds; mitochondrial	39.4	39.4	1	0.004	0.95	KR571221.1	258	....A................	278
1449Select seq gb|KR571203.1|	Macrosiphum zionense voucher BIOUG09681-A09 cytochrome oxidase subunit 1 (COI) gene, partial cds; mitochondrial	39.4	39.4	1	0.004	0.95	KR571203.1	305	....A................	325
1450Select seq gb|KR571193.1|	Aphidinae sp. BOLD-2016 voucher BIOUG03862-G05 cytochrome oxidase subunit 1 (COI) gene, partial cds; mitochondrial	39.4	39.4	1	0.004	0.95	KR571193.1	313	....A................	333
1451Select seq gb|KR571162.1|	Diuraphis sp. BOLD-2016 voucher BIOUG06707-E11 cytochrome oxidase subunit 1 (COI) gene, partial cds; mitochondrial	39.4	39.4	1	0.004	0.95	KR571162.1	313	....A................	333
1452Select seq gb|KR571159.1|	Aphididae sp. BOLD:AAF4380 voucher BIOUG12622-F01 cytochrome oxidase subunit 1 (COI) gene, partial cds; mitochondrial	39.4	39.4	1	0.004	0.95	KR571159.1	303	....A................	323
1453Select seq gb|KR571148.1|	Aphis glycines voucher BIOUG16045-C05 cytochrome oxidase subunit 1 (COI) gene, partial cds; mitochondrial	39.4	39.4	1	0.004	0.95	KR571148.1	312	....A................	332
1454Select seq gb|KR571140.1|	Aphididae sp. BOLD:ACE5126 voucher BIOUG13141-B07 cytochrome oxidase subunit 1 (COI) gene, partial cds; mitochondrial	39.4	39.4	1	0.004	0.95	KR571140.1	313	....A................	333
1455Select seq gb|KR571139.1|	Metopolophium sp. BOLD-2016 voucher BIOUG06155-A07 cytochrome oxidase subunit 1 (COI) gene, partial cds; mitochondrial	39.4	39.4	1	0.004	0.95	KR571139.1	305	....A................	325
1456Select seq gb|KR571108.1|	Macrosiphum sp. BOLD-2016 voucher BIOUG05152-A01 cytochrome oxidase subunit 1 (COI) gene, partial cds; mitochondrial	39.4	39.4	1	0.004	0.95	KR571108.1	313	....A................	333
1457Select seq gb|KR571105.1|	Illinoia sp. BOLD-2016 voucher BIOUG05091-H07 cytochrome oxidase subunit 1 (COI) gene, partial cds; mitochondrial	39.4	39.4	1	0.004	0.95	KR571105.1	291	....A................	311
1458Select seq gb|KR571090.1|	Calaphidinae sp. BOLD-2016 voucher BIOUG03852-F09 cytochrome oxidase subunit 1 (COI) gene, partial cds; mitochondrial	39.4	39.4	1	0.004	0.95	KR571090.1	313	....A................	333
1459Select seq gb|KR571082.1|	Macrosiphum sp. BOLD-2016 voucher BIOUG05111-C03 cytochrome oxidase subunit 1 (COI) gene, partial cds; mitochondrial	39.4	39.4	1	0.004	0.95	KR571082.1	228	....A................	248
1460Select seq gb|KR571064.1|	Nasonovia sp. BOLD:AAB9332 voucher BIOUG08659-E10 cytochrome oxidase subunit 1 (COI) gene, partial cds; mitochondrial	39.4	39.4	1	0.004	0.95	KR571064.1	312	....A................	332
1461Select seq gb|KR571053.1|	Macrosiphum sp. BOLD-2016 voucher BIOUG09173-F03 cytochrome oxidase subunit 1 (COI) gene, partial cds; mitochondrial	39.4	39.4	1	0.004	0.95	KR571053.1	305	....A................	325
1462Select seq gb|KR571002.1|	Macrosiphum sp. BOLD-2016 voucher BIOUG16130-C03 cytochrome oxidase subunit 1 (COI) gene, partial cds; mitochondrial	39.4	39.4	1	0.004	0.95	KR571002.1	303	....A................	323
1463Select seq gb|KR570995.1|	Uroleucon sp. BOLD-2016 voucher BIOUG09177-H07 cytochrome oxidase subunit 1 (COI) gene, partial cds; mitochondrial	39.4	39.4	1	0.004	0.95	KR570995.1	304	....A................	324
1464Select seq gb|KR570951.1|	Rhopalosiphum cerasifoliae voucher BIOUG16130-F09 cytochrome oxidase subunit 1 (COI) gene, partial cds; mitochondrial	39.4	39.4	1	0.004	0.95	KR570951.1	312	....A................	332
1465Select seq gb|KR570941.1|	Aulacorthum sp. BOLD:AAB2572 voucher BIOUG16095-A07 cytochrome oxidase subunit 1 (COI) gene, partial cds; mitochondrial	39.4	39.4	1	0.004	0.95	KR570941.1	300	....A................	320
1466Select seq gb|KR570926.1|	Macrosiphum sp. BOLD-2016 voucher BIOUG06391-A07 cytochrome oxidase subunit 1 (COI) gene, partial cds; mitochondrial	39.4	39.4	1	0.004	0.95	KR570926.1	313	....A................	333
1467Select seq gb|KR570925.1|	Nearctaphis sp. BOLD-2016 voucher BIOUG03633-G07 cytochrome oxidase subunit 1 (COI) gene, partial cds; mitochondrial	39.4	39.4	1	0.004	0.95	KR570925.1	313	....A................	333
1468Select seq gb|KR570917.1|	Calaphidinae sp. BOLD-2016 voucher BIOUG04225-A04 cytochrome oxidase subunit 1 (COI) gene, partial cds; mitochondrial	39.4	39.4	1	0.004	0.95	KR570917.1	313	....A................	333
1469Select seq gb|KR570906.1|	Uroleucon luteolum voucher BIOUG16106-D04 cytochrome oxidase subunit 1 (COI) gene, partial cds; mitochondrial	39.4	39.4	1	0.004	0.95	KR570906.1	312	....A................	332
1470Select seq gb|KR570894.1|	Calaphidinae sp. BOLD-2016 voucher BIOUG04225-B07 cytochrome oxidase subunit 1 (COI) gene, partial cds; mitochondrial	39.4	39.4	1	0.004	0.95	KR570894.1	313	....A................	333
1471Select seq gb|KR570878.1|	Metopolophium sp. BOLD-2016 voucher 10BBCHEM-0870 cytochrome oxidase subunit 1 (COI) gene, partial cds; mitochondrial	39.4	39.4	1	0.004	0.95	KR570878.1	313	....A................	333
1472Select seq gb|KR570874.1|	Calaphidinae sp. BOLD-2016 voucher BIOUG04225-D07 cytochrome oxidase subunit 1 (COI) gene, partial cds; mitochondrial	39.4	39.4	1	0.004	0.95	KR570874.1	313	....A................	333
1473Select seq gb|KR570846.1|	Calaphidinae sp. BOLD-2016 voucher BIOUG03696-E04 cytochrome oxidase subunit 1 (COI) gene, partial cds; mitochondrial	39.4	39.4	1	0.004	0.95	KR570846.1	313	....A................	333
1474Select seq gb|KR570826.1|	Aphis glycines voucher BIOUG08688-C02 cytochrome oxidase subunit 1 (COI) gene, partial cds; mitochondrial	39.4	39.4	1	0.004	0.95	KR570826.1	312	....A................	332
1475Select seq gb|KR570813.1|	Macrosiphum sp. BOLD-2016 voucher BIOUG09161-C06 cytochrome oxidase subunit 1 (COI) gene, partial cds; mitochondrial	39.4	39.4	1	0.004	0.95	KR570813.1	303	....A................	323
1476Select seq gb|KR570800.1|	Macrosiphum sp. BOLD-2016 voucher BIOUG05092-A07 cytochrome oxidase subunit 1 (COI) gene, partial cds; mitochondrial	39.4	39.4	1	0.004	0.95	KR570800.1	303	....A................	323
1477Select seq gb|KR570790.1|	Macrosiphum sp. BOLD-2016 voucher BIOUG09177-B01 cytochrome oxidase subunit 1 (COI) gene, partial cds; mitochondrial	39.4	39.4	1	0.004	0.95	KR570790.1	293	....A................	313
1478Select seq gb|KR570778.1|	Illinoia sp. BOLD-2016 voucher BIOUG09208-A02 cytochrome oxidase subunit 1 (COI) gene, partial cds; mitochondrial	39.4	39.4	1	0.004	0.95	KR570778.1	284	....A................	304
1479Select seq gb|KR570763.1|	Macrosiphum sp. BOLD-2016 voucher 10BBCHEM-0749 cytochrome oxidase subunit 1 (COI) gene, partial cds; mitochondrial	39.4	39.4	1	0.004	0.95	KR570763.1	313	....A................	333
1480Select seq gb|KR570739.1|	Drepanaphis kanzensis voucher BIOUG16056-F09 cytochrome oxidase subunit 1 (COI) gene, partial cds; mitochondrial	39.4	39.4	1	0.004	0.95	KR570739.1	312	....A................	332
1481Select seq gb|KR570716.1|	Uroleucon luteolum voucher BIOUG16025-F04 cytochrome oxidase subunit 1 (COI) gene, partial cds; mitochondrial	39.4	39.4	1	0.004	0.95	KR570716.1	288	....A................	308
1482Select seq gb|KR570690.1|	Calaphidinae sp. BOLD-2016 voucher BIOUG04097-B12 cytochrome oxidase subunit 1 (COI) gene, partial cds; mitochondrial	39.4	39.4	1	0.004	0.95	KR570690.1	313	....A................	333
1483Select seq gb|KR570675.1|	Macrosiphum sp. BOLD-2016 voucher BIOUG05956-C07 cytochrome oxidase subunit 1 (COI) gene, partial cds; mitochondrial	39.4	39.4	1	0.004	0.95	KR570675.1	305	....A................	325
1484Select seq gb|KR570666.1|	Calaphis betulaecolens voucher BIOUG08438-B05 cytochrome oxidase subunit 1 (COI) gene, partial cds; mitochondrial	39.4	39.4	1	0.004	0.95	KR570666.1	312	....A................	332
1485Select seq gb|KR570637.1|	Brachycaudus sp. BOLD:AAC1165 voucher BIOUG10937-A07 cytochrome oxidase subunit 1 (COI) gene, partial cds; mitochondrial	39.4	39.4	1	0.004	0.95	KR570637.1	305	....A................	325
1486Select seq gb|KR570625.1|	Illinoia sp. BOLD-2016 voucher BIOUG09179-H11 cytochrome oxidase subunit 1 (COI) gene, partial cds; mitochondrial	39.4	39.4	1	0.004	0.95	KR570625.1	280	....A................	300
1487Select seq gb|KR570618.1|	Aphididae sp. BOLD:AAJ3619 voucher BIOUG13898-H03 cytochrome oxidase subunit 1 (COI) gene, partial cds; mitochondrial	39.4	39.4	1	0.004	0.95	KR570618.1	313	....A................	333
1488Select seq gb|KR570590.1|	Illinoia sp. BOLD-2016 voucher BIOUG05793-B11 cytochrome oxidase subunit 1 (COI) gene, partial cds; mitochondrial	39.4	39.4	1	0.004	0.95	KR570590.1	303	....A................	323
1489Select seq gb|KR570566.1|	Metopolophium sp. BOLD:AAE7796 voucher BIOUG16125-A05 cytochrome oxidase subunit 1 (COI) gene, partial cds; mitochondrial	39.4	39.4	1	0.004	0.95	KR570566.1	223	....A................	243
1490Select seq gb|KR570519.1|	Aphis glycines voucher BIOUG16025-C10 cytochrome oxidase subunit 1 (COI) gene, partial cds; mitochondrial	39.4	39.4	1	0.004	0.95	KR570519.1	276	....A................	296
1491Select seq gb|KR570516.1|	Illinoia sp. BOLD-2016 voucher BIOUG09300-A08 cytochrome oxidase subunit 1 (COI) gene, partial cds; mitochondrial	39.4	39.4	1	0.004	0.95	KR570516.1	313	....A................	333
1492Select seq gb|KR570495.1|	Macrosiphum sp. BOLD-2016 voucher BIOUG09367-F01 cytochrome oxidase subunit 1 (COI) gene, partial cds; mitochondrial	39.4	39.4	1	0.004	0.95	KR570495.1	302	....A................	322
1493Select seq gb|KR570494.1|	Myzaphis rosarum voucher BIOUG16115-A09 cytochrome oxidase subunit 1 (COI) gene, partial cds; mitochondrial	39.4	39.4	1	0.004	0.95	KR570494.1	303	....A................	323
1494Select seq gb|KR570467.1|	Aphis glycines voucher BIOUG01607-F08 cytochrome oxidase subunit 1 (COI) gene, partial cds; mitochondrial	39.4	39.4	1	0.004	0.95	KR570467.1	257	....A................	277
1495Select seq gb|KR570457.1|	Macrosiphum sp. BOLD-2016 voucher BIOUG16068-D10 cytochrome oxidase subunit 1 (COI) gene, partial cds; mitochondrial	39.4	39.4	1	0.004	0.95	KR570457.1	309	....A................	329
1496Select seq gb|KR570448.1|	Myzus sp. BOLD:AAB2802 voucher BIOUG08491-A03 cytochrome oxidase subunit 1 (COI) gene, partial cds; mitochondrial	39.4	39.4	1	0.004	0.95	KR570448.1	303	....A................	323
1497Select seq gb|KR570437.1|	Macrosiphum zionense voucher BIOUG09681-E01 cytochrome oxidase subunit 1 (COI) gene, partial cds; mitochondrial	39.4	39.4	1	0.004	0.95	KR570437.1	305	....A................	325
1498Select seq gb|KR570432.1|	Calaphidinae sp. BOLD-2016 voucher BIOUG03360-G06 cytochrome oxidase subunit 1 (COI) gene, partial cds; mitochondrial	39.4	39.4	1	0.004	0.95	KR570432.1	313	....A................	333
1499Select seq gb|KR570417.1|	Illinoia sp. BOLD-2016 voucher BIOUG08187-F01 cytochrome oxidase subunit 1 (COI) gene, partial cds; mitochondrial	39.4	39.4	1	0.004	0.95	KR570417.1	300	....A................	320
1500Select seq gb|KR570416.1|	Macrosiphum sp. BOLD-2016 voucher BIOUG09178-F02 cytochrome oxidase subunit 1 (COI) gene, partial cds; mitochondrial	39.4	39.4	1	0.004	0.95	KR570416.1	303	....A................	323
1501Select seq gb|KR570378.1|	Macrosiphum sp. BOLD-2016 voucher BIOUG06637-H08 cytochrome oxidase subunit 1 (COI) gene, partial cds; mitochondrial	39.4	39.4	1	0.004	0.95	KR570378.1	305	....A................	325
1502Select seq gb|KR570367.1|	Macrosiphum sp. BOLD-2016 voucher BIOUG06245-A11 cytochrome oxidase subunit 1 (COI) gene, partial cds; mitochondrial	39.4	39.4	1	0.004	0.95	KR570367.1	291	....A................	311
1503Select seq gb|KR570355.1|	Illinoia sp. BOLD-2016 voucher BIOUG09177-F04 cytochrome oxidase subunit 1 (COI) gene, partial cds; mitochondrial	39.4	39.4	1	0.004	0.95	KR570355.1	311	....A................	331
1504Select seq gb|KR570343.1|	Anoecia sp. BOLD-2016 voucher BIOUG01652-F06 cytochrome oxidase subunit 1 (COI) gene, partial cds; mitochondrial	39.4	39.4	1	0.004	0.95	KR570343.1	313	....A................	333
1505Select seq gb|KR570337.1|	Aphidinae sp. BOLD-2016 voucher BIOUG03938-A12 cytochrome oxidase subunit 1 (COI) gene, partial cds; mitochondrial	39.4	39.4	1	0.004	0.95	KR570337.1	313	....A................	333
1506Select seq gb|KR570336.1|	Uroleucon sp. BOLD-2016 voucher BIOUG09174-F10 cytochrome oxidase subunit 1 (COI) gene, partial cds; mitochondrial	39.4	39.4	1	0.004	0.95	KR570336.1	303	....A................	323
1507Select seq gb|KR570335.1|	Macrosiphum sp. BOLD-2016 voucher BIOUG09177-A09 cytochrome oxidase subunit 1 (COI) gene, partial cds; mitochondrial	39.4	39.4	1	0.004	0.95	KR570335.1	304	....A................	324
1508Select seq gb|KR570332.1|	Hyperomyzus picridis voucher BIOUG16146-A07 cytochrome oxidase subunit 1 (COI) gene, partial cds; mitochondrial	39.4	39.4	1	0.004	0.95	KR570332.1	312	....A................	332
1509Select seq gb|KR570331.1|	Metcalfa pruinosa voucher BIOUG08378-A10 cytochrome oxidase subunit 1 (COI) gene, partial cds; mitochondrial	39.4	39.4	1	0.004	0.95	KR570331.1	221	....T................	241
1510Select seq gb|KR570303.1|	Macrosiphum sp. BOLD-2016 voucher BIOUG06637-A12 cytochrome oxidase subunit 1 (COI) gene, partial cds; mitochondrial	39.4	39.4	1	0.004	0.95	KR570303.1	305	....A................	325
1511Select seq gb|KR570294.1|	Macrosiphum sp. BOLD-2016 voucher BIOUG08884-D09 cytochrome oxidase subunit 1 (COI) gene, partial cds; mitochondrial	39.4	39.4	1	0.004	0.95	KR570294.1	311	....A................	331
1512Select seq gb|KR570292.1|	Myzus sp. BOLD:AAA7683 voucher BIOUG16018-H03 cytochrome oxidase subunit 1 (COI) gene, partial cds; mitochondrial	39.4	39.4	1	0.004	0.95	KR570292.1	246	....A................	266
1513Select seq gb|KR570271.1|	Rhopalomyzus lonicerae voucher BIOUG16146-A09 cytochrome oxidase subunit 1 (COI) gene, partial cds; mitochondrial	39.4	39.4	1	0.004	0.95	KR570271.1	303	....A................	323
1514Select seq gb|KR570213.1|	Macrosiphum sp. BOLD-2016 voucher BIOUG07601-B07 cytochrome oxidase subunit 1 (COI) gene, partial cds; mitochondrial	39.4	39.4	1	0.004	0.95	KR570213.1	313	....A................	333
1515Select seq gb|KR570166.1|	Calaphidinae sp. BOLD-2016 voucher BIOUG04097-A06 cytochrome oxidase subunit 1 (COI) gene, partial cds; mitochondrial	39.4	39.4	1	0.004	0.95	KR570166.1	313	....A................	333
1516Select seq gb|KR570163.1|	Macrosiphum sp. BOLD-2016 voucher BIOUG06155-H11 cytochrome oxidase subunit 1 (COI) gene, partial cds; mitochondrial	39.4	39.4	1	0.004	0.95	KR570163.1	313	....A................	333
1517Select seq gb|KR570162.1|	Illinoia sp. BOLD-2016 voucher BIOUG09623-E12 cytochrome oxidase subunit 1 (COI) gene, partial cds; mitochondrial	39.4	39.4	1	0.004	0.95	KR570162.1	303	....A................	323
1518Select seq gb|KR570151.1|	Macrosiphum pseudocoryli voucher BIOUG05100-H07 cytochrome oxidase subunit 1 (COI) gene, partial cds; mitochondrial	39.4	39.4	1	0.004	0.95	KR570151.1	60	....A................	80
1519Select seq gb|KR570139.1|	Diuraphis sp. BOLD-2016 voucher BIOUG08284-A06 cytochrome oxidase subunit 1 (COI) gene, partial cds; mitochondrial	39.4	39.4	1	0.004	0.95	KR570139.1	291	....A................	311
1520Select seq gb|KR570135.1|	Rhopalosiphum nymphaeae voucher BIOUG16048-G01 cytochrome oxidase subunit 1 (COI) gene, partial cds; mitochondrial	39.4	39.4	1	0.004	0.95	KR570135.1	303	....A................	323
1521Select seq gb|KR570130.1|	Flatidae sp. BOLD:AAG4399 voucher BIOUG08415-H06 cytochrome oxidase subunit 1 (COI) gene, partial cds; mitochondrial	39.4	39.4	1	0.004	0.95	KR570130.1	313	....T................	333
1522Select seq gb|KR570106.1|	Macrosiphum sp. BOLD-2016 voucher BIOUG09461-D07 cytochrome oxidase subunit 1 (COI) gene, partial cds; mitochondrial	39.4	39.4	1	0.004	0.95	KR570106.1	303	....A................	323
1523Select seq gb|KR570084.1|	Aphis sp. BOLD:AAA6378 voucher BIOUG06391-F04 cytochrome oxidase subunit 1 (COI) gene, partial cds; mitochondrial	39.4	39.4	1	0.004	0.95	KR570084.1	257	....A................	277
1524Select seq gb|KR570082.1|	Calaphidinae sp. BOLD-2016 voucher BIOUG04196-H04 cytochrome oxidase subunit 1 (COI) gene, partial cds; mitochondrial	39.4	39.4	1	0.004	0.95	KR570082.1	313	....A................	333
1525Select seq gb|KR570039.1|	Macrosiphum sp. BOLD-2016 voucher BIOUG09180-F11 cytochrome oxidase subunit 1 (COI) gene, partial cds; mitochondrial	39.4	39.4	1	0.004	0.95	KR570039.1	297	....A................	317
1526Select seq gb|KR570026.1|	Metcalfa pruinosa voucher BIOUG06799-F12 cytochrome oxidase subunit 1 (COI) gene, partial cds; mitochondrial	39.4	39.4	1	0.004	0.95	KR570026.1	26	....T................	46
1527Select seq gb|KR570009.1|	Uroleucon nigrotibium voucher 10BBCHEM-1140 cytochrome oxidase subunit 1 (COI) gene, partial cds; mitochondrial	39.4	39.4	1	0.004	0.95	KR570009.1	275	....A................	295
1528Select seq gb|KR569993.1|	Aphididae sp. BOLD:AAD8424 voucher BIOUG17480-H05 cytochrome oxidase subunit 1 (COI) gene, partial cds; mitochondrial	39.4	39.4	1	0.004	0.95	KR569993.1	303	....A................	323
1529Select seq gb|KR569966.1|	Macrosiphum sp. BOLD-2016 voucher BIOUG09179-B12 cytochrome oxidase subunit 1 (COI) gene, partial cds; mitochondrial	39.4	39.4	1	0.004	0.95	KR569966.1	305	....A................	325
1530Select seq gb|KR569958.1|	Aphididae sp. BOLD:AAD2548 voucher BIOUG09681-H08 cytochrome oxidase subunit 1 (COI) gene, partial cds; mitochondrial	39.4	39.4	1	0.004	0.95	KR569958.1	305	....A................	325
1531Select seq gb|KR569931.1|	Calaphidinae sp. BOLD-2016 voucher BIOUG04097-A10 cytochrome oxidase subunit 1 (COI) gene, partial cds; mitochondrial	39.4	39.4	1	0.004	0.95	KR569931.1	313	....A................	333
1532Select seq gb|KR569923.1|	Aphis nerii voucher BIOUG16150-A06 cytochrome oxidase subunit 1 (COI) gene, partial cds; mitochondrial	39.4	39.4	1	0.004	0.95	KR569923.1	303	....A................	323
1533Select seq gb|KR569921.1|	Macrosiphum sp. BOLD-2016 voucher BIOUG08791-H07 cytochrome oxidase subunit 1 (COI) gene, partial cds; mitochondrial	39.4	39.4	1	0.004	0.95	KR569921.1	305	....A................	325
1534Select seq gb|KR569912.1|	Macrosiphum sp. BOLD-2016 voucher BIOUG09180-C08 cytochrome oxidase subunit 1 (COI) gene, partial cds; mitochondrial	39.4	39.4	1	0.004	0.95	KR569912.1	284	....A................	304
1535Select seq gb|KR569903.1|	Calaphidinae sp. BOLD-2016 voucher BIOUG03541-H09 cytochrome oxidase subunit 1 (COI) gene, partial cds; mitochondrial	39.4	39.4	1	0.004	0.95	KR569903.1	313	....A................	333
1536Select seq gb|KR569860.1|	Illinoia sp. BOLD-2016 voucher BIOUG17682-F08 cytochrome oxidase subunit 1 (COI) gene, partial cds; mitochondrial	39.4	39.4	1	0.004	0.95	KR569860.1	303	....A................	323
1537Select seq gb|KR569815.1|	Macrosiphum sp. BOLD-2016 voucher BIOUG05473-C03 cytochrome oxidase subunit 1 (COI) gene, partial cds; mitochondrial	39.4	39.4	1	0.004	0.95	KR569815.1	313	....A................	333
1538Select seq gb|KR569801.1|	Cavariella sp. BOLD:AAC6115 voucher BIOUG06661-F05 cytochrome oxidase subunit 1 (COI) gene, partial cds; mitochondrial	39.4	39.4	1	0.004	0.95	KR569801.1	303	....A................	323
1539Select seq gb|KR569791.1|	Nearctaphis bakeri voucher BIOUG12856-D02 cytochrome oxidase subunit 1 (COI) gene, partial cds; mitochondrial	39.4	39.4	1	0.004	0.95	KR569791.1	312	....A................	332
1540Select seq gb|KR569778.1|	Protaphis middletonii voucher BIOUG07905-A01 cytochrome oxidase subunit 1 (COI) gene, partial cds; mitochondrial	39.4	39.4	1	0.004	0.95	KR569778.1	303	....A................	323
1541Select seq gb|KR569773.1|	Catamergus sp. BOLD-2016 voucher BIOUG03541-A09 cytochrome oxidase subunit 1 (COI) gene, partial cds; mitochondrial	39.4	39.4	1	0.004	0.95	KR569773.1	313	....A................	333
1542Select seq gb|KR569765.1|	Uroleucon sp. BOLD-2016 voucher BIOUG06707-B03 cytochrome oxidase subunit 1 (COI) gene, partial cds; mitochondrial	39.4	39.4	1	0.004	0.95	KR569765.1	303	....A................	323
1543Select seq gb|KR569758.1|	Metopolophium sp. BOLD:AAE7796 voucher BIOUG16125-C06 cytochrome oxidase subunit 1 (COI) gene, partial cds; mitochondrial	39.4	39.4	1	0.004	0.95	KR569758.1	189	....A................	209
1544Select seq gb|KR569739.1|	Nasonovia sp. BOLD:AAB9332 voucher BIOUG16005-D08 cytochrome oxidase subunit 1 (COI) gene, partial cds; mitochondrial	39.4	39.4	1	0.004	0.95	KR569739.1	303	....A................	323
1545Select seq gb|KR569710.1|	Uroleucon sp. BOLD-2016 voucher BIOUG07900-G03 cytochrome oxidase subunit 1 (COI) gene, partial cds; mitochondrial	39.4	39.4	1	0.004	0.95	KR569710.1	312	....A................	332
1546Select seq gb|KR569695.1|	Chaitophorus sp. BOLD-2016 voucher BIOUG13411-F02 cytochrome oxidase subunit 1 (COI) gene, partial cds; mitochondrial	39.4	39.4	1	0.004	0.95	KR569695.1	303	....A................	323
1547Select seq gb|KR569686.1|	Nearctaphis bakeri voucher BIOUG16129-C09 cytochrome oxidase subunit 1 (COI) gene, partial cds; mitochondrial	39.4	39.4	1	0.004	0.95	KR569686.1	312	....A................	332
1548Select seq gb|KR569651.1|	Cinara pruinosa voucher BIOUG16115-B02 cytochrome oxidase subunit 1 (COI) gene, partial cds; mitochondrial	39.4	39.4	1	0.004	0.95	KR569651.1	303	....A................	323
1549Select seq gb|KR569639.1|	Illinoia sp. BOLD-2016 voucher BIOUG09300-D08 cytochrome oxidase subunit 1 (COI) gene, partial cds; mitochondrial	39.4	39.4	1	0.004	0.95	KR569639.1	313	....A................	333
1550Select seq gb|KR569587.1|	Aphidinae sp. BOLD:AAB1787 voucher BIOUG04359-H05 cytochrome oxidase subunit 1 (COI) gene, partial cds; mitochondrial	39.4	39.4	1	0.004	0.95	KR569587.1	313	....A................	333
1551Select seq gb|KR569560.1|	Aphis rubicola voucher 10BBCHEM-1149 cytochrome oxidase subunit 1 (COI) gene, partial cds; mitochondrial	39.4	39.4	1	0.004	0.95	KR569560.1	62	....A................	82
1552Select seq gb|KR569533.1|	Macrosiphum sp. BOLD-2016 voucher BIOUG09176-C11 cytochrome oxidase subunit 1 (COI) gene, partial cds; mitochondrial	39.4	39.4	1	0.004	0.95	KR569533.1	300	....A................	320
1553Select seq gb|KR569518.1|	Aphidinae sp. BOLD-2016 voucher BIOUG03160-C10 cytochrome oxidase subunit 1 (COI) gene, partial cds; mitochondrial	39.4	39.4	1	0.004	0.95	KR569518.1	313	....A................	333
1554Select seq gb|KR569508.1|	Chaitophorus sp. BOLD-2016 voucher BIOUG16152-B07 cytochrome oxidase subunit 1 (COI) gene, partial cds; mitochondrial	39.4	39.4	1	0.004	0.95	KR569508.1	312	....A................	332
1555Select seq gb|KR569478.1|	Aphis pentstemonicola voucher BIOUG03700-D11 cytochrome oxidase subunit 1 (COI) gene, partial cds; mitochondrial	39.4	39.4	1	0.004	0.95	KR569478.1	313	....A................	333
1556Select seq gb|KR569467.1|	Hyadaphis sp. BOLD:ACE3923 voucher BIOUG16095-A08 cytochrome oxidase subunit 1 (COI) gene, partial cds; mitochondrial	39.4	39.4	1	0.004	0.95	KR569467.1	276	....A................	296
1557Select seq gb|KR569435.1|	Illinoia sp. BOLD-2016 voucher BIOUG09176-F09 cytochrome oxidase subunit 1 (COI) gene, partial cds; mitochondrial	39.4	39.4	1	0.004	0.95	KR569435.1	305	....A................	325
1558Select seq gb|KR569402.1|	Calaphidinae sp. BOLD-2016 voucher BIOUG04359-B03 cytochrome oxidase subunit 1 (COI) gene, partial cds; mitochondrial	39.4	39.4	1	0.004	0.95	KR569402.1	313	....A................	333
1559Select seq gb|KR569380.1|	Tamalia sp. BOLD-2016 voucher BIOUG03971-B08 cytochrome oxidase subunit 1 (COI) gene, partial cds; mitochondrial	39.4	39.4	1	0.004	0.95	KR569380.1	313	....A................	333
1560Select seq gb|KR569376.1|	Aphididae sp. BOLD:AAD6640 voucher BIOUG13597-C04 cytochrome oxidase subunit 1 (COI) gene, partial cds; mitochondrial	39.4	39.4	1	0.004	0.95	KR569376.1	313	....A................	333
1561Select seq gb|KR569371.1|	Aphidinae sp. BOLD-2016 voucher BIOUG03941-B02 cytochrome oxidase subunit 1 (COI) gene, partial cds; mitochondrial	39.4	39.4	1	0.004	0.95	KR569371.1	313	....A................	333
1562Select seq gb|KR569356.1|	Plocamaphis sp. BOLD-2016 voucher BIOUG03541-F02 cytochrome oxidase subunit 1 (COI) gene, partial cds; mitochondrial	39.4	39.4	1	0.004	0.95	KR569356.1	313	....A................	333
1563Select seq gb|KR569346.1|	Calaphidinae sp. BOLD-2016 voucher BIOUG06799-F02 cytochrome oxidase subunit 1 (COI) gene, partial cds; mitochondrial	39.4	39.4	1	0.004	0.95	KR569346.1	303	....A................	323
1564Select seq gb|KR569314.1|	Calaphidinae sp. BOLD-2016 voucher BIOUG04197-F10 cytochrome oxidase subunit 1 (COI) gene, partial cds; mitochondrial	39.4	39.4	1	0.004	0.95	KR569314.1	313	....A................	333
1565Select seq gb|KR569296.1|	Calaphidinae sp. BOLD-2016 voucher BIOUG03158-E09 cytochrome oxidase subunit 1 (COI) gene, partial cds; mitochondrial	39.4	39.4	1	0.004	0.95	KR569296.1	313	....A................	333
1566Select seq gb|KR569287.1|	Macrosiphum sp. BOLD-2016 voucher BIOUG09179-B05 cytochrome oxidase subunit 1 (COI) gene, partial cds; mitochondrial	39.4	39.4	1	0.004	0.95	KR569287.1	305	....A................	325
1567Select seq gb|KR569266.1|	Illinoia sp. BOLD-2016 voucher BIOUG09338-H11 cytochrome oxidase subunit 1 (COI) gene, partial cds; mitochondrial	39.4	39.4	1	0.004	0.95	KR569266.1	305	....A................	325
1568Select seq gb|KR569248.1|	Schizolachnus sp. BOLD:AAE3796 voucher BIOUG16134-H01 cytochrome oxidase subunit 1 (COI) gene, partial cds; mitochondrial	39.4	39.4	1	0.004	0.95	KR569248.1	313	....A................	333
1569Select seq gb|KR569241.1|	Calaphidinae sp. BOLD-2016 voucher BIOUG04225-B11 cytochrome oxidase subunit 1 (COI) gene, partial cds; mitochondrial	39.4	39.4	1	0.004	0.95	KR569241.1	313	....A................	333
1570Select seq gb|KR569199.1|	Aphidinae sp. BOLD-2016 voucher BIOUG09028-H02 cytochrome oxidase subunit 1 (COI) gene, partial cds; mitochondrial	39.4	39.4	1	0.004	0.95	KR569199.1	305	....A................	325
1571Select seq gb|KR569194.1|	Aphis glycines voucher BIOUG16028-A01 cytochrome oxidase subunit 1 (COI) gene, partial cds; mitochondrial	39.4	39.4	1	0.004	0.95	KR569194.1	313	....A................	333
1572Select seq gb|KR569191.1|	Calaphidinae sp. BOLD-2016 voucher BIOUG04225-D12 cytochrome oxidase subunit 1 (COI) gene, partial cds; mitochondrial	39.4	39.4	1	0.004	0.95	KR569191.1	313	....A................	333
1573Select seq gb|KR569110.1|	Macrosiphum sp. BOLD-2016 voucher BIOUG05100-F01 cytochrome oxidase subunit 1 (COI) gene, partial cds; mitochondrial	39.4	39.4	1	0.004	0.95	KR569110.1	303	....A................	323
1574Select seq gb|KR569094.1|	Uroleucon sp. BOLD-2016 voucher BIOUG07937-F07 cytochrome oxidase subunit 1 (COI) gene, partial cds; mitochondrial	39.4	39.4	1	0.004	0.95	KR569094.1	312	....A................	332
1575Select seq gb|KR569078.1|	Chaetosiphon sp. BOLD-2016 voucher BIOUG05090-A05 cytochrome oxidase subunit 1 (COI) gene, partial cds; mitochondrial	39.4	39.4	1	0.004	0.95	KR569078.1	313	....A................	333
1576Select seq gb|KR569005.1|	Aphididae sp. BOLD:AAF8501 voucher BIOUG09681-G05 cytochrome oxidase subunit 1 (COI) gene, partial cds; mitochondrial	39.4	39.4	1	0.004	0.95	KR569005.1	305	....A................	325
1577Select seq gb|KR568993.1|	Aphis rubicola voucher BIOUG04653-D04 cytochrome oxidase subunit 1 (COI) gene, partial cds; mitochondrial	39.4	39.4	1	0.004	0.95	KR568993.1	60	....A................	80
1578Select seq gb|KR568960.1|	Drepanaphis sp. BOLD-2016 voucher BIOUG16056-F01 cytochrome oxidase subunit 1 (COI) gene, partial cds; mitochondrial	39.4	39.4	1	0.004	0.95	KR568960.1	312	....A................	332
1579Select seq gb|KR568959.1|	Aphidinae sp. BOLD-2016 voucher BIOUG09367-B04 cytochrome oxidase subunit 1 (COI) gene, partial cds; mitochondrial	39.4	39.4	1	0.004	0.95	KR568959.1	305	....A................	325
1580Select seq gb|KR568958.1|	Rhopalomyzus lonicerae voucher BIOUG16168-D03 cytochrome oxidase subunit 1 (COI) gene, partial cds; mitochondrial	39.4	39.4	1	0.004	0.95	KR568958.1	303	....A................	323
1581Select seq gb|KR568944.1|	Calaphidinae sp. BOLD-2016 voucher BIOUG03360-D03 cytochrome oxidase subunit 1 (COI) gene, partial cds; mitochondrial	39.4	39.4	1	0.004	0.95	KR568944.1	313	....A................	333
1582Select seq gb|KR568934.1|	Metopolophium sp. BOLD:AAE7796 voucher BIOUG16130-F07 cytochrome oxidase subunit 1 (COI) gene, partial cds; mitochondrial	39.4	39.4	1	0.004	0.95	KR568934.1	222	....A................	242
1583Select seq gb|KR568925.1|	Macrosiphum zionense voucher BIOUG09237-D06 cytochrome oxidase subunit 1 (COI) gene, partial cds; mitochondrial	39.4	39.4	1	0.004	0.95	KR568925.1	305	....A................	325
1584Select seq gb|KR568909.1|	Illinoia sp. BOLD-2016 voucher BIOUG09177-G11 cytochrome oxidase subunit 1 (COI) gene, partial cds; mitochondrial	39.4	39.4	1	0.004	0.95	KR568909.1	305	....A................	325
1585Select seq gb|KR568894.1|	Aphthargelia symphoricarpi voucher BIOUG16063-B10 cytochrome oxidase subunit 1 (COI) gene, partial cds; mitochondrial	39.4	39.4	1	0.004	0.95	KR568894.1	312	....A................	332
1586Select seq gb|KR568882.1|	Aphidinae sp. BOLD-2016 voucher BIOUG05473-A05 cytochrome oxidase subunit 1 (COI) gene, partial cds; mitochondrial	39.4	39.4	1	0.004	0.95	KR568882.1	301	....A................	321
1587Select seq gb|KR568879.1|	Calaphidinae sp. BOLD-2016 voucher BIOUG03696-D04 cytochrome oxidase subunit 1 (COI) gene, partial cds; mitochondrial	39.4	39.4	1	0.004	0.95	KR568879.1	313	....A................	333
1588Select seq gb|KR568845.1|	Rhopalosiphum nymphaeae voucher BIOUG16066-H03 cytochrome oxidase subunit 1 (COI) gene, partial cds; mitochondrial	39.4	39.4	1	0.004	0.95	KR568845.1	303	....A................	323
1589Select seq gb|KR568832.1|	Uroleucon anomalae voucher BIOUG16025-C06 cytochrome oxidase subunit 1 (COI) gene, partial cds; mitochondrial	39.4	39.4	1	0.004	0.95	KR568832.1	313	....A................	333
1590Select seq gb|KR568831.1|	Calaphidinae sp. BOLD-2016 voucher BIOUG04196-G11 cytochrome oxidase subunit 1 (COI) gene, partial cds; mitochondrial	39.4	39.4	1	0.004	0.95	KR568831.1	313	....A................	333
1591Select seq gb|KR568823.1|	Macrosiphum sp. BOLD-2016 voucher BIOUG09208-E04 cytochrome oxidase subunit 1 (COI) gene, partial cds; mitochondrial	39.4	39.4	1	0.004	0.95	KR568823.1	305	....A................	325
1592Select seq gb|KR568805.1|	Calaphidinae sp. BOLD-2016 voucher BIOUG04225-B03 cytochrome oxidase subunit 1 (COI) gene, partial cds; mitochondrial	39.4	39.4	1	0.004	0.95	KR568805.1	313	....A................	333
1593Select seq gb|KR568802.1|	Aphis glycines voucher BIOUG16150-A09 cytochrome oxidase subunit 1 (COI) gene, partial cds; mitochondrial	39.4	39.4	1	0.004	0.95	KR568802.1	303	....A................	323
1594Select seq gb|KR568798.1|	Macrosiphum sp. BOLD-2016 voucher BIOUG06245-C11 cytochrome oxidase subunit 1 (COI) gene, partial cds; mitochondrial	39.4	39.4	1	0.004	0.95	KR568798.1	313	....A................	333
1595Select seq gb|KR568786.1|	Rhopalosiphum sp. BOLD:AAD1504 voucher BIOUG12856-C11 cytochrome oxidase subunit 1 (COI) gene, partial cds; mitochondrial	39.4	39.4	1	0.004	0.95	KR568786.1	312	....A................	332
1596Select seq gb|KR568768.1|	Aphidinae sp. BOLD-2016 voucher BIOUG05473-G03 cytochrome oxidase subunit 1 (COI) gene, partial cds; mitochondrial	39.4	39.4	1	0.004	0.95	KR568768.1	305	....A................	325
1597Select seq gb|KR568750.1|	Calaphidinae sp. BOLD-2016 voucher BIOUG04197-E04 cytochrome oxidase subunit 1 (COI) gene, partial cds; mitochondrial	39.4	39.4	1	0.004	0.95	KR568750.1	313	....A................	333
1598Select seq gb|KR568728.1|	Flatidae sp. BOLD:AAG4399 voucher BIOUG09137-E01 cytochrome oxidase subunit 1 (COI) gene, partial cds; mitochondrial	39.4	39.4	1	0.004	0.95	KR568728.1	305	....T................	325
1599Select seq gb|KR568723.1|	Aphididae sp. BOLD:AAG2059 voucher BIOUG14005-D01 cytochrome oxidase subunit 1 (COI) gene, partial cds; mitochondrial	39.4	39.4	1	0.004	0.95	KR568723.1	292	....A................	312
1600Select seq gb|KR568722.1|	Callipterinella sp. BOLD-2016 voucher BIOUG16131-D01 cytochrome oxidase subunit 1 (COI) gene, partial cds; mitochondrial	39.4	39.4	1	0.004	0.95	KR568722.1	312	....A................	332
1601Select seq gb|KR568713.1|	Aphis glycines voucher BIOUG16139-H09 cytochrome oxidase subunit 1 (COI) gene, partial cds; mitochondrial	39.4	39.4	1	0.004	0.95	KR568713.1	303	....A................	323
1602Select seq gb|KR568699.1|	Illinoia sp. BOLD-2016 voucher BIOUG09300-D10 cytochrome oxidase subunit 1 (COI) gene, partial cds; mitochondrial	39.4	39.4	1	0.004	0.95	KR568699.1	313	....A................	333
1603Select seq gb|KR568694.1|	Calaphidinae sp. BOLD-2016 voucher BIOUG04097-C06 cytochrome oxidase subunit 1 (COI) gene, partial cds; mitochondrial	39.4	39.4	1	0.004	0.95	KR568694.1	313	....A................	333
1604Select seq gb|KR568678.1|	Macrosiphum sp. BOLD-2016 voucher BIOUG09179-H05 cytochrome oxidase subunit 1 (COI) gene, partial cds; mitochondrial	39.4	39.4	1	0.004	0.95	KR568678.1	313	....A................	333
1605Select seq gb|KR568667.1|	Hyperomyzus sp. BOLD:AAB8566 voucher BIOUG16125-A02 cytochrome oxidase subunit 1 (COI) gene, partial cds; mitochondrial	39.4	39.4	1	0.004	0.95	KR568667.1	261	....A................	281
1606Select seq gb|KR568666.1|	Macrosiphum sp. BOLD-2016 voucher BIOUG09179-G06 cytochrome oxidase subunit 1 (COI) gene, partial cds; mitochondrial	39.4	39.4	1	0.004	0.95	KR568666.1	305	....A................	325
1607Select seq gb|KR568647.1|	Illinoia sp. BOLD-2016 voucher BIOUG09461-E08 cytochrome oxidase subunit 1 (COI) gene, partial cds; mitochondrial	39.4	39.4	1	0.004	0.95	KR568647.1	303	....A................	323
1608Select seq gb|KR568646.1|	Tetraneura sp. BOLD:AAG3894 voucher BIOUG06939-E05 cytochrome oxidase subunit 1 (COI) gene, partial cds; mitochondrial	39.4	39.4	1	0.004	0.95	KR568646.1	305	....A................	325
1609Select seq gb|KR568645.1|	Macrosiphum sp. BOLD-2016 voucher BIOUG03941-B09 cytochrome oxidase subunit 1 (COI) gene, partial cds; mitochondrial	39.4	39.4	1	0.004	0.95	KR568645.1	313	....A................	333
1610Select seq gb|KR568610.1|	Cinara laricifex voucher 10PROBE-22328 cytochrome oxidase subunit 1 (COI) gene, partial cds; mitochondrial	39.4	39.4	1	0.004	0.95	KR568610.1	282	....A................	302
1611Select seq gb|KR568590.1|	Uroleucon sp. BOLD-2016 voucher BIOUG09174-C11 cytochrome oxidase subunit 1 (COI) gene, partial cds; mitochondrial	39.4	39.4	1	0.004	0.95	KR568590.1	305	....A................	325
1612Select seq gb|KR568581.1|	Macrosiphum sp. BOLD-2016 voucher BIOUG18091-D05 cytochrome oxidase subunit 1 (COI) gene, partial cds; mitochondrial	39.4	39.4	1	0.004	0.95	KR568581.1	303	....A................	323
1613Select seq gb|KR568573.1|	Macrosiphum sp. BOLD-2016 voucher BIOUG09173-B03 cytochrome oxidase subunit 1 (COI) gene, partial cds; mitochondrial	39.4	39.4	1	0.004	0.95	KR568573.1	304	....A................	324
1614Select seq gb|KR568570.1|	Macrosiphum sp. BOLD-2016 voucher BIOUG16025-C08 cytochrome oxidase subunit 1 (COI) gene, partial cds; mitochondrial	39.4	39.4	1	0.004	0.95	KR568570.1	313	....A................	333
1615Select seq gb|KR568566.1|	Hayhurstia atriplicis voucher BIOUG12795-B04 cytochrome oxidase subunit 1 (COI) gene, partial cds; mitochondrial	39.4	39.4	1	0.004	0.95	KR568566.1	303	....A................	323
1616Select seq gb|KR568558.1|	Macrosiphum sp. BOLD-2016 voucher BIOUG09179-F08 cytochrome oxidase subunit 1 (COI) gene, partial cds; mitochondrial	39.4	39.4	1	0.004	0.95	KR568558.1	296	....A................	316
1617Select seq gb|KR568557.1|	Illinoia sp. BOLD-2016 voucher BIOUG06155-A05 cytochrome oxidase subunit 1 (COI) gene, partial cds; mitochondrial	39.4	39.4	1	0.004	0.95	KR568557.1	313	....A................	333
1618Select seq gb|KR568547.1|	Calaphidinae sp. BOLD-2016 voucher BIOUG03541-F05 cytochrome oxidase subunit 1 (COI) gene, partial cds; mitochondrial	39.4	39.4	1	0.004	0.95	KR568547.1	313	....A................	333
1619Select seq gb|KR568518.1|	Calaphidinae sp. BOLD-2016 voucher BIOUG04097-E02 cytochrome oxidase subunit 1 (COI) gene, partial cds; mitochondrial	39.4	39.4	1	0.004	0.95	KR568518.1	313	....A................	333
1620Select seq gb|KR568506.1|	Illinoia sp. BOLD-2016 voucher BIOUG16130-G06 cytochrome oxidase subunit 1 (COI) gene, partial cds; mitochondrial	39.4	39.4	1	0.004	0.95	KR568506.1	312	....A................	332
1621Select seq gb|KR568504.1|	Macrosiphum sp. BOLD-2016 voucher BIOUG06358-B08 cytochrome oxidase subunit 1 (COI) gene, partial cds; mitochondrial	39.4	39.4	1	0.004	0.95	KR568504.1	304	....A................	324
1622Select seq gb|KR568471.1|	Calaphidinae sp. BOLD-2016 voucher BIOUG04196-C11 cytochrome oxidase subunit 1 (COI) gene, partial cds; mitochondrial	39.4	39.4	1	0.004	0.95	KR568471.1	313	....A................	333
1623Select seq gb|KR568470.1|	Aphidinae sp. BOLD-2016 voucher BIOUG05473-C01 cytochrome oxidase subunit 1 (COI) gene, partial cds; mitochondrial	39.4	39.4	1	0.004	0.95	KR568470.1	305	....A................	325
1624Select seq gb|KR568453.1|	Calaphidinae sp. BOLD-2016 voucher BIOUG03158-C03 cytochrome oxidase subunit 1 (COI) gene, partial cds; mitochondrial	39.4	39.4	1	0.004	0.95	KR568453.1	313	....A................	333
1625Select seq gb|KR568428.1|	Calaphidinae sp. BOLD-2016 voucher BIOUG04197-G01 cytochrome oxidase subunit 1 (COI) gene, partial cds; mitochondrial	39.4	39.4	1	0.004	0.95	KR568428.1	265	....A................	285
1626Select seq gb|KR568414.1|	Braggia sp. BOLD-2016 voucher BIOUG03541-E11 cytochrome oxidase subunit 1 (COI) gene, partial cds; mitochondrial	39.4	39.4	1	0.004	0.95	KR568414.1	313	....A................	333
1627Select seq gb|KR568412.1|	Aphididae sp. BOLD:AAI3449 voucher BIOUG08671-A03 cytochrome oxidase subunit 1 (COI) gene, partial cds; mitochondrial	39.4	39.4	1	0.004	0.95	KR568412.1	305	....A................	325
1628Select seq gb|KR568391.1|	Hyperomyzus picridis voucher BIOUG16008-D07 cytochrome oxidase subunit 1 (COI) gene, partial cds; mitochondrial	39.4	39.4	1	0.004	0.95	KR568391.1	261	....A................	281
1629Select seq gb|KR568369.1|	Macrosiphoniella sp. BOLD-2016 voucher BIOUG16055-D08 cytochrome oxidase subunit 1 (COI) gene, partial cds; mitochondrial	39.4	39.4	1	0.004	0.95	KR568369.1	312	....A................	332
1630Select seq gb|KR568358.1|	Macrosiphum sp. BOLD-2016 voucher BIOUG08862-H07 cytochrome oxidase subunit 1 (COI) gene, partial cds; mitochondrial	39.4	39.4	1	0.004	0.95	KR568358.1	296	....A................	316
1631Select seq gb|KR568346.1|	Aphidinae sp. BOLD-2016 voucher BIOUG08337-F06 cytochrome oxidase subunit 1 (COI) gene, partial cds; mitochondrial	39.4	39.4	1	0.004	0.95	KR568346.1	313	....A................	333
1632Select seq gb|KR568322.1|	Aulacorthum sp. BOLD:AAB2572 voucher BIOUG08005-D06 cytochrome oxidase subunit 1 (COI) gene, partial cds; mitochondrial	39.4	39.4	1	0.004	0.95	KR568322.1	303	....A................	323
1633Select seq gb|KR568316.1|	Macrosiphum pseudocoryli voucher BIOUG05100-G03 cytochrome oxidase subunit 1 (COI) gene, partial cds; mitochondrial	39.4	39.4	1	0.004	0.95	KR568316.1	123	....A................	143
1634Select seq gb|KR568314.1|	Myzus cerasi voucher BIOUG07527-B08 cytochrome oxidase subunit 1 (COI) gene, partial cds; mitochondrial	39.4	39.4	1	0.004	0.95	KR568314.1	305	....A................	325
1635Select seq gb|KR568310.1|	Aphidinae sp. BOLD:AAB1787 voucher BIOUG02739-E05 cytochrome oxidase subunit 1 (COI) gene, partial cds; mitochondrial	39.4	39.4	1	0.004	0.95	KR568310.1	313	....A................	333
1636Select seq gb|KR568292.1|	Calaphidinae sp. BOLD-2016 voucher BIOUG03716-B05 cytochrome oxidase subunit 1 (COI) gene, partial cds; mitochondrial	39.4	39.4	1	0.004	0.95	KR568292.1	313	....A................	333
1637Select seq gb|KR568272.1|	Macrosiphum sp. BOLD-2016 voucher BIOUG08388-A12 cytochrome oxidase subunit 1 (COI) gene, partial cds; mitochondrial	39.4	39.4	1	0.004	0.95	KR568272.1	303	....A................	323
1638Select seq gb|KR568263.1|	Illinoia sp. BOLD-2016 voucher BIOUG09623-B07 cytochrome oxidase subunit 1 (COI) gene, partial cds; mitochondrial	39.4	39.4	1	0.004	0.95	KR568263.1	303	....A................	323
1639Select seq gb|KR568262.1|	Calaphidinae sp. BOLD-2016 voucher BIOUG04196-F05 cytochrome oxidase subunit 1 (COI) gene, partial cds; mitochondrial	39.4	39.4	1	0.004	0.95	KR568262.1	313	....A................	333
1640Select seq gb|KR568237.1|	Macrosiphum sp. BOLD-2016 voucher BIOUG05473-B07 cytochrome oxidase subunit 1 (COI) gene, partial cds; mitochondrial	39.4	39.4	1	0.004	0.95	KR568237.1	313	....A................	333
1641Select seq gb|KR568215.1|	Uroleucon sp. BOLD-2016 voucher BIOUG09178-B02 cytochrome oxidase subunit 1 (COI) gene, partial cds; mitochondrial	39.4	39.4	1	0.004	0.95	KR568215.1	304	....A................	324
1642Select seq gb|KR568203.1|	Aphis glycines voucher BIOUG16008-D09 cytochrome oxidase subunit 1 (COI) gene, partial cds; mitochondrial	39.4	39.4	1	0.004	0.95	KR568203.1	258	....A................	278
1643Select seq gb|KR568198.1|	Aphis glycines voucher BIOUG01607-B07 cytochrome oxidase subunit 1 (COI) gene, partial cds; mitochondrial	39.4	39.4	1	0.004	0.95	KR568198.1	287	....A................	307
1644Select seq gb|KR568191.1|	Aphidinae sp. BOLD-2016 voucher BIOUG05116-A05 cytochrome oxidase subunit 1 (COI) gene, partial cds; mitochondrial	39.4	39.4	1	0.004	0.95	KR568191.1	313	....A................	333
1645Select seq gb|KR568175.1|	Rhopalosiphum cerasifoliae voucher BIOUG12502-C10 cytochrome oxidase subunit 1 (COI) gene, partial cds; mitochondrial	39.4	39.4	1	0.004	0.95	KR568175.1	303	....A................	323
1646Select seq gb|KR568173.1|	Uroleucon sp. BOLD-2016 voucher BIOUG04874-D04 cytochrome oxidase subunit 1 (COI) gene, partial cds; mitochondrial	39.4	39.4	1	0.004	0.95	KR568173.1	303	....A................	323
1647Select seq gb|KR568172.1|	Brachycaudus sp. BOLD:AAC1165 voucher BIOUG07700-D02 cytochrome oxidase subunit 1 (COI) gene, partial cds; mitochondrial	39.4	39.4	1	0.004	0.95	KR568172.1	313	....A................	333
1648Select seq gb|KR568164.1|	Aphis craccae voucher BIOUG12795-C11 cytochrome oxidase subunit 1 (COI) gene, partial cds; mitochondrial	39.4	39.4	1	0.004	0.95	KR568164.1	313	....A................	333
1649Select seq gb|KR568161.1|	Illinoia sp. BOLD-2016 voucher BIOUG09623-H09 cytochrome oxidase subunit 1 (COI) gene, partial cds; mitochondrial	39.4	39.4	1	0.004	0.95	KR568161.1	303	....A................	323
1650Select seq gb|KR568136.1|	Macrosiphum sp. BOLD-2016 voucher BIOUG16130-H01 cytochrome oxidase subunit 1 (COI) gene, partial cds; mitochondrial	39.4	39.4	1	0.004	0.95	KR568136.1	303	....A................	323
1651Select seq gb|KR568118.1|	Uroleucon sp. BOLD-2016 voucher BIOUG08503-A01 cytochrome oxidase subunit 1 (COI) gene, partial cds; mitochondrial	39.4	39.4	1	0.004	0.95	KR568118.1	304	....A................	324
1652Select seq gb|KR568094.1|	Aphis glycines voucher BIOUG16071-G02 cytochrome oxidase subunit 1 (COI) gene, partial cds; mitochondrial	39.4	39.4	1	0.004	0.95	KR568094.1	312	....A................	332
1653Select seq gb|KR568072.1|	Metopolophium sp. BOLD:AAE7796 voucher BIOUG16018-B08 cytochrome oxidase subunit 1 (COI) gene, partial cds; mitochondrial	39.4	39.4	1	0.004	0.95	KR568072.1	300	....A................	320
1654Select seq gb|KR568068.1|	Macrosiphum zionense voucher BIOUG09237-A12 cytochrome oxidase subunit 1 (COI) gene, partial cds; mitochondrial	39.4	39.4	1	0.004	0.95	KR568068.1	305	....A................	325
1655Select seq gb|KR568058.1|	Nearctaphis sp. BOLD-2016 voucher BIOUG03726-D09 cytochrome oxidase subunit 1 (COI) gene, partial cds; mitochondrial	39.4	39.4	1	0.004	0.95	KR568058.1	313	....A................	333
1656Select seq gb|KR568039.1|	Macrosiphum pseudocoryli voucher BIOUG05111-B03 cytochrome oxidase subunit 1 (COI) gene, partial cds; mitochondrial	39.4	39.4	1	0.004	0.95	KR568039.1	135	....A................	155
1657Select seq gb|KR568026.1|	Aphidinae sp. BOLD-2016 voucher BIOUG05473-H11 cytochrome oxidase subunit 1 (COI) gene, partial cds; mitochondrial	39.4	39.4	1	0.004	0.95	KR568026.1	305	....A................	325
1658Select seq gb|KR568024.1|	Macrosiphum sp. BOLD-2016 voucher BIOUG04396-H01 cytochrome oxidase subunit 1 (COI) gene, partial cds; mitochondrial	39.4	39.4	1	0.004	0.95	KR568024.1	313	....A................	333
1659Select seq gb|KR568019.1|	Illinoia sp. BOLD-2016 voucher BIOUG09461-C07 cytochrome oxidase subunit 1 (COI) gene, partial cds; mitochondrial	39.4	39.4	1	0.004	0.95	KR568019.1	303	....A................	323
1660Select seq gb|KR568011.1|	Hyperomyzus picridis voucher BIOUG16008-A05 cytochrome oxidase subunit 1 (COI) gene, partial cds; mitochondrial	39.4	39.4	1	0.004	0.95	KR568011.1	313	....A................	333
1661Select seq gb|KR568009.1|	Calaphidinae sp. BOLD-2016 voucher BIOUG03696-H05 cytochrome oxidase subunit 1 (COI) gene, partial cds; mitochondrial	39.4	39.4	1	0.004	0.95	KR568009.1	313	....A................	333
1662Select seq gb|KR567975.1|	Calaphidinae sp. BOLD-2016 voucher BIOUG03852-G07 cytochrome oxidase subunit 1 (COI) gene, partial cds; mitochondrial	39.4	39.4	1	0.004	0.95	KR567975.1	313	....A................	333
1663Select seq gb|KR567973.1|	Rhopalosiphum sp. BOLD:ABZ6546 voucher BIOUG08646-D02 cytochrome oxidase subunit 1 (COI) gene, partial cds; mitochondrial	39.4	39.4	1	0.004	0.95	KR567973.1	312	....A................	332
1664Select seq gb|KR567970.1|	Aphidinae sp. BOLD-2016 voucher BIOUG05793-C01 cytochrome oxidase subunit 1 (COI) gene, partial cds; mitochondrial	39.4	39.4	1	0.004	0.95	KR567970.1	313	....A................	333
1665Select seq gb|KR567965.1|	Aphis sp. BOLD:AAB7937 voucher BIOUG10896-H02 cytochrome oxidase subunit 1 (COI) gene, partial cds; mitochondrial	39.4	39.4	1	0.004	0.95	KR567965.1	316	....A................	336
1666Select seq gb|KR567958.1|	Macrosiphum sp. BOLD-2016 voucher BIOUG04445-H04 cytochrome oxidase subunit 1 (COI) gene, partial cds; mitochondrial	39.4	39.4	1	0.004	0.95	KR567958.1	303	....A................	323
1667Select seq gb|KR567953.1|	Macrosiphum sp. BOLD-2016 voucher BIOUG06252-F08 cytochrome oxidase subunit 1 (COI) gene, partial cds; mitochondrial	39.4	39.4	1	0.004	0.95	KR567953.1	313	....A................	333
1668Select seq gb|KR567931.1|	Macrosiphum sp. BOLD-2016 voucher BIOUG01000-A01 cytochrome oxidase subunit 1 (COI) gene, partial cds; mitochondrial	39.4	39.4	1	0.004	0.95	KR567931.1	313	....A................	333
1669Select seq gb|KR567908.1|	Rhopalosiphum sp. BOLD:ABZ6546 voucher BIOUG08648-G04 cytochrome oxidase subunit 1 (COI) gene, partial cds; mitochondrial	39.4	39.4	1	0.004	0.95	KR567908.1	312	....A................	332
1670Select seq gb|KR567893.1|	Metopolophium sp. BOLD:AAE7796 voucher BIOUG16129-B11 cytochrome oxidase subunit 1 (COI) gene, partial cds; mitochondrial	39.4	39.4	1	0.004	0.95	KR567893.1	297	....A................	317
1671Select seq gb|KR567848.1|	Aphis glycines voucher BIOUG16068-C11 cytochrome oxidase subunit 1 (COI) gene, partial cds; mitochondrial	39.4	39.4	1	0.004	0.95	KR567848.1	313	....A................	333
1672Select seq gb|KR567844.1|	Uroleucon sp. BOLD-2016 voucher BIOUG05090-F10 cytochrome oxidase subunit 1 (COI) gene, partial cds; mitochondrial	39.4	39.4	1	0.004	0.95	KR567844.1	261	....A................	281
1673Select seq gb|KR567837.1|	Calaphidinae sp. BOLD-2016 voucher BIOUG04196-B12 cytochrome oxidase subunit 1 (COI) gene, partial cds; mitochondrial	39.4	39.4	1	0.004	0.95	KR567837.1	313	....A................	333
1674Select seq gb|KR567829.1|	Macrosiphum sp. BOLD-2016 voucher BIOUG09623-A11 cytochrome oxidase subunit 1 (COI) gene, partial cds; mitochondrial	39.4	39.4	1	0.004	0.95	KR567829.1	303	....A................	323
1675Select seq gb|KR567827.1|	Uroleucon sp. BOLD-2016 voucher BIOUG02022-D10 cytochrome oxidase subunit 1 (COI) gene, partial cds; mitochondrial	39.4	39.4	1	0.004	0.95	KR567827.1	313	....A................	333
1676Select seq gb|KR567812.1|	Illinoia sp. BOLD-2016 voucher BIOUG06901-A04 cytochrome oxidase subunit 1 (COI) gene, partial cds; mitochondrial	39.4	39.4	1	0.004	0.95	KR567812.1	313	....A................	333
1677Select seq gb|KR567810.1|	Calaphidinae sp. BOLD-2016 voucher BIOUG03696-C07 cytochrome oxidase subunit 1 (COI) gene, partial cds; mitochondrial	39.4	39.4	1	0.004	0.95	KR567810.1	313	....A................	333
1678Select seq gb|KR567805.1|	Macrosiphum sp. BOLD-2016 voucher BIOUG06252-D12 cytochrome oxidase subunit 1 (COI) gene, partial cds; mitochondrial	39.4	39.4	1	0.004	0.95	KR567805.1	293	....A................	313
1679Select seq gb|KR567786.1|	Macrosiphum zionense voucher 10BBCHEM-0396 cytochrome oxidase subunit 1 (COI) gene, partial cds; mitochondrial	39.4	39.4	1	0.004	0.95	KR567786.1	313	....A................	333
1680Select seq gb|KR567774.1|	Aphis sp. BOLD-2016 voucher BIOUG02749-F11 cytochrome oxidase subunit 1 (COI) gene, partial cds; mitochondrial	39.4	39.4	1	0.004	0.95	KR567774.1	313	....A................	333
1681Select seq gb|KR567773.1|	Capitophorus sp. BOLD-2016 voucher BIOUG08493-A11 cytochrome oxidase subunit 1 (COI) gene, partial cds; mitochondrial	39.4	39.4	1	0.004	0.95	KR567773.1	312	....A................	332
1682Select seq gb|KR567771.1|	Saltusaphidinae sp. BOLD-2016 voucher BIOUG06240-G09 cytochrome oxidase subunit 1 (COI) gene, partial cds; mitochondrial	39.4	39.4	1	0.004	0.95	KR567771.1	313	....A................	333
1683Select seq gb|KR567755.1|	Tetraneura sp. BOLD:AAG3894 voucher BIOUG08392-A03 cytochrome oxidase subunit 1 (COI) gene, partial cds; mitochondrial	39.4	39.4	1	0.004	0.95	KR567755.1	303	....A................	323
1684Select seq gb|KR567736.1|	Macrosiphum sp. BOLD-2016 voucher BIOUG09178-C12 cytochrome oxidase subunit 1 (COI) gene, partial cds; mitochondrial	39.4	39.4	1	0.004	0.95	KR567736.1	300	....A................	320
1685Select seq gb|KR567726.1|	Aphis forbesi voucher BIOUG05013-A04 cytochrome oxidase subunit 1 (COI) gene, partial cds; mitochondrial	39.4	39.4	1	0.004	0.95	KR567726.1	3	....A................	23
1686Select seq gb|KR567725.1|	Aphis sp. BOLD-2016 voucher BIOUG13926-A05 cytochrome oxidase subunit 1 (COI) gene, partial cds; mitochondrial	39.4	39.4	1	0.004	0.95	KR567725.1	303	....A................	323
1687Select seq gb|KR567719.1|	Macrosiphum sp. BOLD-2016 voucher BIOUG06010-B02 cytochrome oxidase subunit 1 (COI) gene, partial cds; mitochondrial	39.4	39.4	1	0.004	0.95	KR567719.1	313	....A................	333
1688Select seq gb|KR567694.1|	Calaphidinae sp. BOLD-2016 voucher BIOUG04359-A10 cytochrome oxidase subunit 1 (COI) gene, partial cds; mitochondrial	39.4	39.4	1	0.004	0.95	KR567694.1	313	....A................	333
1689Select seq gb|KR567685.1|	Uroleucon sp. BOLD-2016 voucher BIOUG09175-F09 cytochrome oxidase subunit 1 (COI) gene, partial cds; mitochondrial	39.4	39.4	1	0.004	0.95	KR567685.1	304	....A................	324
1690Select seq gb|KR567677.1|	Aphidinae sp. BOLD-2016 voucher BIOUG17480-G10 cytochrome oxidase subunit 1 (COI) gene, partial cds; mitochondrial	39.4	39.4	1	0.004	0.95	KR567677.1	303	....A................	323
1691Select seq gb|KR567675.1|	Macrosiphum sp. BOLD-2016 voucher BIOUG05956-E03 cytochrome oxidase subunit 1 (COI) gene, partial cds; mitochondrial	39.4	39.4	1	0.004	0.95	KR567675.1	305	....A................	325
1692Select seq gb|KR567669.1|	Aphis sp. BOLD:AAB7937 voucher BIOUG10486-G11 cytochrome oxidase subunit 1 (COI) gene, partial cds; mitochondrial	39.4	39.4	1	0.004	0.95	KR567669.1	313	....A................	333
1693Select seq gb|KR567662.1|	Macrosiphum sp. BOLD-2016 voucher BIOUG09079-G11 cytochrome oxidase subunit 1 (COI) gene, partial cds; mitochondrial	39.4	39.4	1	0.004	0.95	KR567662.1	303	....A................	323
1694Select seq gb|KR567617.1|	Illinoia sp. BOLD-2016 voucher BIOUG09178-E11 cytochrome oxidase subunit 1 (COI) gene, partial cds; mitochondrial	39.4	39.4	1	0.004	0.95	KR567617.1	301	....A................	321
1695Select seq gb|KR567614.1|	Metcalfa pruinosa voucher BIOUG08644-H09 cytochrome oxidase subunit 1 (COI) gene, partial cds; mitochondrial	39.4	39.4	1	0.004	0.95	KR567614.1	226	....T................	246
1696Select seq gb|KR567591.1|	Flatidae sp. BOLD:AAG4399 voucher BIOUG10780-E11 cytochrome oxidase subunit 1 (COI) gene, partial cds; mitochondrial	39.4	39.4	1	0.004	0.95	KR567591.1	167	....T................	187
1697Select seq gb|KR567571.1|	Hyadaphis passerinii voucher BIOUG08659-F03 cytochrome oxidase subunit 1 (COI) gene, partial cds; mitochondrial	39.4	39.4	1	0.004	0.95	KR567571.1	312	....A................	332
1698Select seq gb|KR567545.1|	Nearctaphis sp. BOLD-2016 voucher BIOUG03523-C03 cytochrome oxidase subunit 1 (COI) gene, partial cds; mitochondrial	39.4	39.4	1	0.004	0.95	KR567545.1	313	....A................	333
1699Select seq gb|KR567512.1|	Illinoia sp. BOLD-2016 voucher BIOUG09173-H06 cytochrome oxidase subunit 1 (COI) gene, partial cds; mitochondrial	39.4	39.4	1	0.004	0.95	KR567512.1	300	....A................	320
1700Select seq gb|KR567508.1|	Uroleucon sp. BOLD-2016 voucher BIOUG09175-H08 cytochrome oxidase subunit 1 (COI) gene, partial cds; mitochondrial	39.4	39.4	1	0.004	0.95	KR567508.1	305	....A................	325
1701Select seq gb|KR567486.1|	Ovatomyzus boraginacearum voucher BIOUG16010-G03 cytochrome oxidase subunit 1 (COI) gene, partial cds; mitochondrial	39.4	39.4	1	0.004	0.95	KR567486.1	252	....A................	272
1702Select seq gb|KR567473.1|	Hyperomyzus sp. BOLD:AAB8566 voucher BIOUG16161-C09 cytochrome oxidase subunit 1 (COI) gene, partial cds; mitochondrial	39.4	39.4	1	0.004	0.95	KR567473.1	303	....A................	323
1703Select seq gb|KR567469.1|	Calaphidinae sp. BOLD-2016 voucher BIOUG03852-H03 cytochrome oxidase subunit 1 (COI) gene, partial cds; mitochondrial	39.4	39.4	1	0.004	0.95	KR567469.1	313	....A................	333
1704Select seq gb|KR567468.1|	Aphidinae sp. BOLD:AAD9153 voucher BIOUG08044-H04 cytochrome oxidase subunit 1 (COI) gene, partial cds; mitochondrial	39.4	39.4	1	0.004	0.95	KR567468.1	312	....A................	332
1705Select seq gb|KR567453.1|	Calaphidinae sp. BOLD-2016 voucher BIOUG04197-A05 cytochrome oxidase subunit 1 (COI) gene, partial cds; mitochondrial	39.4	39.4	1	0.004	0.95	KR567453.1	313	....A................	333
1706Select seq gb|KR567426.1|	Nearctaphis bakeri voucher BIOUG16130-D09 cytochrome oxidase subunit 1 (COI) gene, partial cds; mitochondrial	39.4	39.4	1	0.004	0.95	KR567426.1	288	....A................	308
1707Select seq gb|KR567425.1|	Aphididae sp. BOLD:ACE5126 voucher BIOUG13563-B01 cytochrome oxidase subunit 1 (COI) gene, partial cds; mitochondrial	39.4	39.4	1	0.004	0.95	KR567425.1	303	....A................	323
1708Select seq gb|KR567424.1|	Macrosiphum sp. BOLD-2016 voucher BIOUG04445-A12 cytochrome oxidase subunit 1 (COI) gene, partial cds; mitochondrial	39.4	39.4	1	0.004	0.95	KR567424.1	312	....A................	332
1709Select seq gb|KR567397.1|	Calaphidinae sp. BOLD-2016 voucher BIOUG04197-E06 cytochrome oxidase subunit 1 (COI) gene, partial cds; mitochondrial	39.4	39.4	1	0.004	0.95	KR567397.1	313	....A................	333
1710Select seq gb|KR567396.1|	Macrosiphum sp. BOLD-2016 voucher BIOUG05116-D11 cytochrome oxidase subunit 1 (COI) gene, partial cds; mitochondrial	39.4	39.4	1	0.004	0.95	KR567396.1	276	....A................	296
1711Select seq gb|KR567386.1|	Ovatus crataegarius voucher BIOUG13117-B08 cytochrome oxidase subunit 1 (COI) gene, partial cds; mitochondrial	39.4	39.4	1	0.004	0.95	KR567386.1	313	....A................	333
1712Select seq gb|KR567370.1|	Uroleucon sp. BOLD-2016 voucher BIOUG09180-D12 cytochrome oxidase subunit 1 (COI) gene, partial cds; mitochondrial	39.4	39.4	1	0.004	0.95	KR567370.1	304	....A................	324
1713Select seq gb|KR567312.1|	Aphis sp. BOLD:AAA6378 voucher BIOUG04653-C10 cytochrome oxidase subunit 1 (COI) gene, partial cds; mitochondrial	39.4	39.4	1	0.004	0.95	KR567312.1	312	....A................	332
1714Select seq gb|KR567276.1|	Nearctaphis sp. BOLD-2016 voucher BIOUG05232-F01 cytochrome oxidase subunit 1 (COI) gene, partial cds; mitochondrial	39.4	39.4	1	0.004	0.95	KR567276.1	305	....A................	325
1715Select seq gb|KR567221.1|	Uroleucon sp. BOLD-2016 voucher BIOUG05111-H06 cytochrome oxidase subunit 1 (COI) gene, partial cds; mitochondrial	39.4	39.4	1	0.004	0.95	KR567221.1	312	....A................	332
1716Select seq gb|KR567219.1|	Brachycaudus sp. BOLD:AAC1165 voucher BIOUG12376-A09 cytochrome oxidase subunit 1 (COI) gene, partial cds; mitochondrial	39.4	39.4	1	0.004	0.95	KR567219.1	313	....A................	333
1717Select seq gb|KR567192.1|	Macrosiphum sp. BOLD-2016 voucher BIOUG05433-B08 cytochrome oxidase subunit 1 (COI) gene, partial cds; mitochondrial	39.4	39.4	1	0.004	0.95	KR567192.1	303	....A................	323
1718Select seq gb|KR567191.1|	Uroleucon sp. BOLD-2016 voucher BIOUG06706-D09 cytochrome oxidase subunit 1 (COI) gene, partial cds; mitochondrial	39.4	39.4	1	0.004	0.95	KR567191.1	303	....A................	323
1719Select seq gb|KR567187.1|	Aphidinae sp. BOLD-2016 voucher BIOUG13346-H09 cytochrome oxidase subunit 1 (COI) gene, partial cds; mitochondrial	39.4	39.4	1	0.004	0.95	KR567187.1	300	....A................	320
1720Select seq gb|KR567177.1|	Uroleucon sp. BOLD-2016 voucher BIOUG03672-D07 cytochrome oxidase subunit 1 (COI) gene, partial cds; mitochondrial	39.4	39.4	1	0.004	0.95	KR567177.1	313	....A................	333
1721Select seq gb|KR567167.1|	Calaphidinae sp. BOLD-2016 voucher BIOUG04359-G10 cytochrome oxidase subunit 1 (COI) gene, partial cds; mitochondrial	39.4	39.4	1	0.004	0.95	KR567167.1	313	....A................	333
1722Select seq gb|KR567155.1|	Uroleucon sp. BOLD-2016 voucher BIOUG05116-G05 cytochrome oxidase subunit 1 (COI) gene, partial cds; mitochondrial	39.4	39.4	1	0.004	0.95	KR567155.1	303	....A................	323
1723Select seq gb|KR567150.1|	Saltusaphidinae sp. BOLD-2016 voucher BIOUG06314-E03 cytochrome oxidase subunit 1 (COI) gene, partial cds; mitochondrial	39.4	39.4	1	0.004	0.95	KR567150.1	313	....A................	333
1724Select seq gb|KR567144.1|	Aphididae sp. BOLD:AAB1787 voucher BIOUG13927-C02 cytochrome oxidase subunit 1 (COI) gene, partial cds; mitochondrial	39.4	39.4	1	0.004	0.95	KR567144.1	303	....A................	323
1725Select seq gb|KR567142.1|	Calaphidinae sp. BOLD-2016 voucher BIOUG03541-H02 cytochrome oxidase subunit 1 (COI) gene, partial cds; mitochondrial	39.4	39.4	1	0.004	0.95	KR567142.1	313	....A................	333
1726Select seq gb|KR567128.1|	Macrosiphum sp. BOLD-2016 voucher BIOUG09178-F01 cytochrome oxidase subunit 1 (COI) gene, partial cds; mitochondrial	39.4	39.4	1	0.004	0.95	KR567128.1	313	....A................	333
1727Select seq gb|KR567120.1|	Calaphidinae sp. BOLD-2016 voucher BIOUG04359-C06 cytochrome oxidase subunit 1 (COI) gene, partial cds; mitochondrial	39.4	39.4	1	0.004	0.95	KR567120.1	313	....A................	333
1728Select seq gb|KR567113.1|	Aphididae sp. BOLD:AAB7938 voucher BIOUG09681-E08 cytochrome oxidase subunit 1 (COI) gene, partial cds; mitochondrial	39.4	39.4	1	0.004	0.95	KR567113.1	297	....A................	317
1729Select seq gb|KR567110.1|	Uroleucon sp. BOLD-2016 voucher BIOUG09236-B03 cytochrome oxidase subunit 1 (COI) gene, partial cds; mitochondrial	39.4	39.4	1	0.004	0.95	KR567110.1	305	....A................	325
1730Select seq gb|KR567106.1|	Macrosiphum sp. BOLD-2016 voucher BIOUG09173-D02 cytochrome oxidase subunit 1 (COI) gene, partial cds; mitochondrial	39.4	39.4	1	0.004	0.95	KR567106.1	305	....A................	325
1731Select seq gb|KR567100.1|	Macrosiphoniella paucisetosa voucher BIOUG07212-F03 cytochrome oxidase subunit 1 (COI) gene, partial cds; mitochondrial	39.4	39.4	1	0.004	0.95	KR567100.1	313	....A................	333
1732Select seq gb|KR567089.1|	Aphis sp. BOLD:AAB7937 voucher BIOUG12461-E02 cytochrome oxidase subunit 1 (COI) gene, partial cds; mitochondrial	39.4	39.4	1	0.004	0.95	KR567089.1	312	....A................	332
1733Select seq gb|KR567063.1|	Gypsoaphis sp. BOLD-2016 voucher BIOUG03541-A11 cytochrome oxidase subunit 1 (COI) gene, partial cds; mitochondrial	39.4	39.4	1	0.004	0.95	KR567063.1	313	....A................	333
1734Select seq gb|KR567047.1|	Myzus lythri voucher BIOUG16001-E12 cytochrome oxidase subunit 1 (COI) gene, partial cds; mitochondrial	39.4	39.4	1	0.004	0.95	KR567047.1	312	....A................	332
1735Select seq gb|KR567044.1|	Calaphidinae sp. BOLD-2016 voucher BIOUG04359-C01 cytochrome oxidase subunit 1 (COI) gene, partial cds; mitochondrial	39.4	39.4	1	0.004	0.95	KR567044.1	313	....A................	333
1736Select seq gb|KR567041.1|	Illinoia sp. BOLD-2016 voucher BIOUG09461-E04 cytochrome oxidase subunit 1 (COI) gene, partial cds; mitochondrial	39.4	39.4	1	0.004	0.95	KR567041.1	303	....A................	323
1737Select seq gb|KR567026.1|	Calaphidinae sp. BOLD-2016 voucher BIOUG03696-E02 cytochrome oxidase subunit 1 (COI) gene, partial cds; mitochondrial	39.4	39.4	1	0.004	0.95	KR567026.1	313	....A................	333
1738Select seq gb|KR567016.1|	Cinara sp. BOLD-2016 voucher BIOUG07800-H06 cytochrome oxidase subunit 1 (COI) gene, partial cds; mitochondrial	39.4	39.4	1	0.004	0.95	KR567016.1	314	....A................	334
1739Select seq gb|KR567008.1|	Calaphidinae sp. BOLD-2016 voucher BIOUG03158-G08 cytochrome oxidase subunit 1 (COI) gene, partial cds; mitochondrial	39.4	39.4	1	0.004	0.95	KR567008.1	313	....A................	333
1740Select seq gb|KR566999.1|	Aphis sp. BOLD:AAE7309 voucher BIOUG07525-C07 cytochrome oxidase subunit 1 (COI) gene, partial cds; mitochondrial	39.4	39.4	1	0.004	0.95	KR566999.1	305	....A................	325
1741Select seq gb|KR566986.1|	Illinoia sp. BOLD-2016 voucher BIOUG14006-H08 cytochrome oxidase subunit 1 (COI) gene, partial cds; mitochondrial	39.4	39.4	1	0.004	0.95	KR566986.1	292	....A................	312
1742Select seq gb|KR566969.1|	Aphididae sp. BOLD:AAB7938 voucher BIOUG09640-F07 cytochrome oxidase subunit 1 (COI) gene, partial cds; mitochondrial	39.4	39.4	1	0.004	0.95	KR566969.1	298	....A................	318
1743Select seq gb|KR566954.1|	Illinoia sp. BOLD-2016 voucher BIOUG07312-A05 cytochrome oxidase subunit 1 (COI) gene, partial cds; mitochondrial	39.4	39.4	1	0.004	0.95	KR566954.1	304	....A................	324
1744Select seq gb|KR566946.1|	Macrosiphum sp. BOLD-2016 voucher BIOUG09179-F02 cytochrome oxidase subunit 1 (COI) gene, partial cds; mitochondrial	39.4	39.4	1	0.004	0.95	KR566946.1	279	....A................	299
1745Select seq gb|KR566924.1|	Tetraneura sp. BOLD:AAG3894 voucher BIOUG08648-G05 cytochrome oxidase subunit 1 (COI) gene, partial cds; mitochondrial	39.4	39.4	1	0.004	0.95	KR566924.1	312	....A................	332
1746Select seq gb|KR566914.1|	Aphididae sp. BOLD:AAB1787 voucher BIOUG14258-G05 cytochrome oxidase subunit 1 (COI) gene, partial cds; mitochondrial	39.4	39.4	1	0.004	0.95	KR566914.1	303	....A................	323
1747Select seq gb|KR566904.1|	Aphis sp. BOLD:AAB7937 voucher BIOUG12795-C01 cytochrome oxidase subunit 1 (COI) gene, partial cds; mitochondrial	39.4	39.4	1	0.004	0.95	KR566904.1	303	....A................	323
1748Select seq gb|KR566903.1|	Callipterinella sp. BOLD-2016 voucher BIOUG16130-B12 cytochrome oxidase subunit 1 (COI) gene, partial cds; mitochondrial	39.4	39.4	1	0.004	0.95	KR566903.1	309	....A................	329
1749Select seq gb|KR566902.1|	Macrosiphum sp. BOLD-2016 voucher BIOUG09180-H10 cytochrome oxidase subunit 1 (COI) gene, partial cds; mitochondrial	39.4	39.4	1	0.004	0.95	KR566902.1	293	....A................	313
1750Select seq gb|KR566889.1|	Metopolophium sp. BOLD:AAE7796 voucher BIOUG16161-C06 cytochrome oxidase subunit 1 (COI) gene, partial cds; mitochondrial	39.4	39.4	1	0.004	0.95	KR566889.1	303	....A................	323
1751Select seq gb|KR566876.1|	Aphis glycines voucher BIOUG16150-A11 cytochrome oxidase subunit 1 (COI) gene, partial cds; mitochondrial	39.4	39.4	1	0.004	0.95	KR566876.1	312	....A................	332
1752Select seq gb|KR566870.1|	Macrosiphum sp. BOLD-2016 voucher BIOUG06641-C03 cytochrome oxidase subunit 1 (COI) gene, partial cds; mitochondrial	39.4	39.4	1	0.004	0.95	KR566870.1	305	....A................	325
1753Select seq gb|KR566869.1|	Aphis pentstemonicola voucher BIOUG04396-B10 cytochrome oxidase subunit 1 (COI) gene, partial cds; mitochondrial	39.4	39.4	1	0.004	0.95	KR566869.1	313	....A................	333
1754Select seq gb|KR566851.1|	Macrosiphum sp. BOLD-2016 voucher BIOUG06245-H07 cytochrome oxidase subunit 1 (COI) gene, partial cds; mitochondrial	39.4	39.4	1	0.004	0.95	KR566851.1	304	....A................	324
1755Select seq gb|KR566840.1|	Chaitophorus populicola voucher 10BBCHEM-1151 cytochrome oxidase subunit 1 (COI) gene, partial cds; mitochondrial	39.4	39.4	1	0.004	0.95	KR566840.1	313	....A................	333
1756Select seq gb|KR566833.1|	Hamamelistes spinosus voucher BIOUG06234-E06 cytochrome oxidase subunit 1 (COI) gene, partial cds; mitochondrial	39.4	39.4	1	0.004	0.95	KR566833.1	224	....A................	244
1757Select seq gb|KR566828.1|	Calaphidinae sp. BOLD-2016 voucher BIOUG03541-A06 cytochrome oxidase subunit 1 (COI) gene, partial cds; mitochondrial	39.4	39.4	1	0.004	0.95	KR566828.1	313	....A................	333
1758Select seq gb|KR566822.1|	Macrosiphum sp. BOLD-2016 voucher BIOUG05090-A01 cytochrome oxidase subunit 1 (COI) gene, partial cds; mitochondrial	39.4	39.4	1	0.004	0.95	KR566822.1	303	....A................	323
1759Select seq gb|KR566818.1|	Macrosiphum sp. BOLD-2016 voucher BIOUG09180-B08 cytochrome oxidase subunit 1 (COI) gene, partial cds; mitochondrial	39.4	39.4	1	0.004	0.95	KR566818.1	305	....A................	325
1760Select seq gb|KR566802.1|	Macrosiphum sp. BOLD-2016 voucher BIOUG09623-F04 cytochrome oxidase subunit 1 (COI) gene, partial cds; mitochondrial	39.4	39.4	1	0.004	0.95	KR566802.1	303	....A................	323
1761Select seq gb|KR566767.1|	Uroleucon taraxaci voucher BIOUG08646-D03 cytochrome oxidase subunit 1 (COI) gene, partial cds; mitochondrial	39.4	39.4	1	0.004	0.95	KR566767.1	312	....A................	332
1762Select seq gb|KR566747.1|	Aphidinae sp. BOLD:AAB1787 voucher BIOUG08493-B08 cytochrome oxidase subunit 1 (COI) gene, partial cds; mitochondrial	39.4	39.4	1	0.004	0.95	KR566747.1	312	....A................	332
1763Select seq gb|KR566742.1|	Cinara sp. BOLD-2016 voucher BIOUG08112-E04 cytochrome oxidase subunit 1 (COI) gene, partial cds; mitochondrial	39.4	39.4	1	0.004	0.95	KR566742.1	312	....A................	332
1764Select seq gb|KR566735.1|	Rhopalosiphum cerasifoliae voucher BIOUG16130-C08 cytochrome oxidase subunit 1 (COI) gene, partial cds; mitochondrial	39.4	39.4	1	0.004	0.95	KR566735.1	312	....A................	332
1765Select seq gb|KR566727.1|	Macrosiphum sp. BOLD-2016 voucher BIOUG05090-D07 cytochrome oxidase subunit 1 (COI) gene, partial cds; mitochondrial	39.4	39.4	1	0.004	0.95	KR566727.1	303	....A................	323
1766Select seq gb|KR566722.1|	Calaphidinae sp. BOLD-2016 voucher BIOUG03716-C08 cytochrome oxidase subunit 1 (COI) gene, partial cds; mitochondrial	39.4	39.4	1	0.004	0.95	KR566722.1	313	....A................	333
1767Select seq gb|KR566698.1|	Aphidinae sp. BOLD-2016 voucher BIOUG05464-G01 cytochrome oxidase subunit 1 (COI) gene, partial cds; mitochondrial	39.4	39.4	1	0.004	0.95	KR566698.1	313	....A................	333
1768Select seq gb|KR566686.1|	Drepanaphis kanzensis voucher BIOUG16056-E06 cytochrome oxidase subunit 1 (COI) gene, partial cds; mitochondrial	39.4	39.4	1	0.004	0.95	KR566686.1	312	....A................	332
1769Select seq gb|KR566673.1|	Uroleucon sp. BOLD-2016 voucher BIOUG08388-C04 cytochrome oxidase subunit 1 (COI) gene, partial cds; mitochondrial	39.4	39.4	1	0.004	0.95	KR566673.1	303	....A................	323
1770Select seq gb|KR566668.1|	Macrosiphum sp. BOLD-2016 voucher BIOUG09175-B06 cytochrome oxidase subunit 1 (COI) gene, partial cds; mitochondrial	39.4	39.4	1	0.004	0.95	KR566668.1	304	....A................	324
1771Select seq gb|KR566656.1|	Aphis glycines voucher BIOUG16068-C12 cytochrome oxidase subunit 1 (COI) gene, partial cds; mitochondrial	39.4	39.4	1	0.004	0.95	KR566656.1	303	....A................	323
1772Select seq gb|KR566655.1|	Illinoia sp. BOLD-2016 voucher BIOUG08388-G04 cytochrome oxidase subunit 1 (COI) gene, partial cds; mitochondrial	39.4	39.4	1	0.004	0.95	KR566655.1	303	....A................	323
1773Select seq gb|KR566629.1|	Calaphidinae sp. BOLD-2016 voucher BIOUG04572-A04 cytochrome oxidase subunit 1 (COI) gene, partial cds; mitochondrial	39.4	39.4	1	0.004	0.95	KR566629.1	313	....A................	333
1774Select seq gb|KR566624.1|	Aphis glycines voucher BIOUG16037-D09 cytochrome oxidase subunit 1 (COI) gene, partial cds; mitochondrial	39.4	39.4	1	0.004	0.95	KR566624.1	313	....A................	333
1775Select seq gb|KR566622.1|	Calaphidinae sp. BOLD-2016 voucher BIOUG03158-G09 cytochrome oxidase subunit 1 (COI) gene, partial cds; mitochondrial	39.4	39.4	1	0.004	0.95	KR566622.1	313	....A................	333
1776Select seq gb|KR566620.1|	Brachycaudus helichrysi voucher BIOUG13373-F10 cytochrome oxidase subunit 1 (COI) gene, partial cds; mitochondrial	39.4	39.4	1	0.004	0.95	KR566620.1	303	....A................	323
1777Select seq gb|KR566608.1|	Aphis sp. BOLD:AAA4183 voucher BIOUG16167-B02 cytochrome oxidase subunit 1 (COI) gene, partial cds; mitochondrial	39.4	39.4	1	0.004	0.95	KR566608.1	312	....A................	332
1778Select seq gb|KR566606.1|	Mindarus sp. 1 CF-2009 voucher BIOUG05828-F03 cytochrome oxidase subunit 1 (COI) gene, partial cds; mitochondrial	39.4	39.4	1	0.004	0.95	KR566606.1	313	....A................	333
1779Select seq gb|KR566596.1|	Calaphidinae sp. BOLD-2016 voucher BIOUG02749-A09 cytochrome oxidase subunit 1 (COI) gene, partial cds; mitochondrial	39.4	39.4	1	0.004	0.95	KR566596.1	313	....A................	333
1780Select seq gb|KR566590.1|	Macrosiphum sp. BOLD-2016 voucher BIOUG07601-C06 cytochrome oxidase subunit 1 (COI) gene, partial cds; mitochondrial	39.4	39.4	1	0.004	0.95	KR566590.1	313	....A................	333
1781Select seq gb|KR566563.1|	Macrosiphum sp. BOLD-2016 voucher BIOUG09179-A01 cytochrome oxidase subunit 1 (COI) gene, partial cds; mitochondrial	39.4	39.4	1	0.004	0.95	KR566563.1	305	....A................	325
1782Select seq gb|KR566552.1|	Aphididae sp. BOLD:AAB7938 voucher BIOUG08324-H03 cytochrome oxidase subunit 1 (COI) gene, partial cds; mitochondrial	39.4	39.4	1	0.004	0.95	KR566552.1	313	....A................	333
1783Select seq gb|KR566544.1|	Macrosiphum sp. BOLD-2016 voucher BIOUG06688-C12 cytochrome oxidase subunit 1 (COI) gene, partial cds; mitochondrial	39.4	39.4	1	0.004	0.95	KR566544.1	304	....A................	324
1784Select seq gb|KR566543.1|	Metopolophium sp. BOLD-2016 voucher BIOUG06155-G11 cytochrome oxidase subunit 1 (COI) gene, partial cds; mitochondrial	39.4	39.4	1	0.004	0.95	KR566543.1	305	....A................	325
1785Select seq gb|KR566534.1|	Diuraphis sp. BOLD-2016 voucher BIOUG01643-C01 cytochrome oxidase subunit 1 (COI) gene, partial cds; mitochondrial	39.4	39.4	1	0.004	0.95	KR566534.1	313	....A................	333
1786Select seq gb|KR566531.1|	Capitophorus sp. BOLD-2016 voucher BIOUG16156-E11 cytochrome oxidase subunit 1 (COI) gene, partial cds; mitochondrial	39.4	39.4	1	0.004	0.95	KR566531.1	312	....A................	332
1787Select seq gb|KR566524.1|	Aphis sp. BOLD:AAB7937 voucher BIOUG12757-E12 cytochrome oxidase subunit 1 (COI) gene, partial cds; mitochondrial	39.4	39.4	1	0.004	0.95	KR566524.1	303	....A................	323
1788Select seq gb|KR566508.1|	Hyperomyzus sp. BOLD:AAB8566 voucher BIOUG09208-E08 cytochrome oxidase subunit 1 (COI) gene, partial cds; mitochondrial	39.4	39.4	1	0.004	0.95	KR566508.1	277	....A................	297
1789Select seq gb|KR566505.1|	Macrosiphum sp. BOLD-2016 voucher BIOUG05961-B01 cytochrome oxidase subunit 1 (COI) gene, partial cds; mitochondrial	39.4	39.4	1	0.004	0.95	KR566505.1	313	....A................	333
1790Select seq gb|KR566491.1|	Capitophorus sp. BOLD-2016 voucher BIOUG07956-B04 cytochrome oxidase subunit 1 (COI) gene, partial cds; mitochondrial	39.4	39.4	1	0.004	0.95	KR566491.1	313	....A................	333
1791Select seq gb|KR566475.1|	Capitophorus sp. BOLD-2016 voucher BIOUG16021-A04 cytochrome oxidase subunit 1 (COI) gene, partial cds; mitochondrial	39.4	39.4	1	0.004	0.95	KR566475.1	312	....A................	332
1792Select seq gb|KR566447.1|	Macrosiphoniella sp. BOLD-2016 voucher BIOUG07811-E08 cytochrome oxidase subunit 1 (COI) gene, partial cds; mitochondrial	39.4	39.4	1	0.004	0.95	KR566447.1	313	....A................	333
1793Select seq gb|KR566432.1|	Macrosiphum sp. BOLD-2016 voucher BIOUG09173-D12 cytochrome oxidase subunit 1 (COI) gene, partial cds; mitochondrial	39.4	39.4	1	0.004	0.95	KR566432.1	304	....A................	324
1794Select seq gb|KR566430.1|	Calaphidinae sp. BOLD-2016 voucher BIOUG03696-C11 cytochrome oxidase subunit 1 (COI) gene, partial cds; mitochondrial	39.4	39.4	1	0.004	0.95	KR566430.1	313	....A................	333
1795Select seq gb|KR566392.1|	Aulacorthum sp. BOLD:AAB2572 voucher BIOUG08005-E02 cytochrome oxidase subunit 1 (COI) gene, partial cds; mitochondrial	39.4	39.4	1	0.004	0.95	KR566392.1	312	....A................	332
1796Select seq gb|KR566390.1|	Calaphidinae sp. BOLD-2016 voucher BIOUG03852-H11 cytochrome oxidase subunit 1 (COI) gene, partial cds; mitochondrial	39.4	39.4	1	0.004	0.95	KR566390.1	313	....A................	333
1797Select seq gb|KR566372.1|	Macrosiphum sp. BOLD-2016 voucher BIOUG09461-H09 cytochrome oxidase subunit 1 (COI) gene, partial cds; mitochondrial	39.4	39.4	1	0.004	0.95	KR566372.1	303	....A................	323
1798Select seq gb|KR566359.1|	Chaitophorus sp. BOLD-2016 voucher BIOUG13383-B02 cytochrome oxidase subunit 1 (COI) gene, partial cds; mitochondrial	39.4	39.4	1	0.004	0.95	KR566359.1	303	....A................	323
1799Select seq gb|KR566350.1|	Calaphidinae sp. BOLD-2016 voucher BIOUG07661-H11 cytochrome oxidase subunit 1 (COI) gene, partial cds; mitochondrial	39.4	39.4	1	0.004	0.95	KR566350.1	312	....A................	332
1800Select seq gb|KR566328.1|	Aphis glycines voucher BIOUG16071-E02 cytochrome oxidase subunit 1 (COI) gene, partial cds; mitochondrial	39.4	39.4	1	0.004	0.95	KR566328.1	297	....A................	317
1801Select seq gb|KR566323.1|	Calaphidinae sp. BOLD-2016 voucher BIOUG03541-H11 cytochrome oxidase subunit 1 (COI) gene, partial cds; mitochondrial	39.4	39.4	1	0.004	0.95	KR566323.1	313	....A................	333
1802Select seq gb|KR566308.1|	Calaphidinae sp. BOLD-2016 voucher BIOUG03852-E05 cytochrome oxidase subunit 1 (COI) gene, partial cds; mitochondrial	39.4	39.4	1	0.004	0.95	KR566308.1	313	....A................	333
1803Select seq gb|KR566302.1|	Metcalfa pruinosa voucher BIOUG08650-H03 cytochrome oxidase subunit 1 (COI) gene, partial cds; mitochondrial	39.4	39.4	1	0.004	0.95	KR566302.1	313	....T................	333
1804Select seq gb|KR566268.1|	Callipterinella sp. BOLD-2016 voucher BIOUG16099-B05 cytochrome oxidase subunit 1 (COI) gene, partial cds; mitochondrial	39.4	39.4	1	0.004	0.95	KR566268.1	312	....A................	332
1805Select seq gb|KR566259.1|	Callipterinella sp. BOLD-2016 voucher BIOUG16097-D05 cytochrome oxidase subunit 1 (COI) gene, partial cds; mitochondrial	39.4	39.4	1	0.004	0.95	KR566259.1	312	....A................	332
1806Select seq gb|KR566231.1|	Calaphidinae sp. BOLD-2016 voucher BIOUG04359-D06 cytochrome oxidase subunit 1 (COI) gene, partial cds; mitochondrial	39.4	39.4	1	0.004	0.95	KR566231.1	313	....A................	333
1807Select seq gb|KR566218.1|	Calaphidinae sp. BOLD-2016 voucher BIOUG16131-F06 cytochrome oxidase subunit 1 (COI) gene, partial cds; mitochondrial	39.4	39.4	1	0.004	0.95	KR566218.1	303	....A................	323
1808Select seq gb|KR566213.1|	Macrosiphum sp. BOLD-2016 voucher BIOUG06311-A12 cytochrome oxidase subunit 1 (COI) gene, partial cds; mitochondrial	39.4	39.4	1	0.004	0.95	KR566213.1	303	....A................	323
1809Select seq gb|KR566202.1|	Calaphidinae sp. BOLD-2016 voucher BIOUG13183-A08 cytochrome oxidase subunit 1 (COI) gene, partial cds; mitochondrial	39.4	39.4	1	0.004	0.95	KR566202.1	303	....A................	323
1810Select seq gb|KR566183.1|	Macrosiphum sp. BOLD-2016 voucher BIOUG09176-A11 cytochrome oxidase subunit 1 (COI) gene, partial cds; mitochondrial	39.4	39.4	1	0.004	0.95	KR566183.1	311	....A................	331
1811Select seq gb|KR566145.1|	Hyperomyzus sp. BOLD:AAB8566 voucher BIOUG06548-F08 cytochrome oxidase subunit 1 (COI) gene, partial cds; mitochondrial	39.4	39.4	1	0.004	0.95	KR566145.1	303	....A................	323
1812Select seq gb|KR566129.1|	Calaphidinae sp. BOLD-2016 voucher BIOUG04196-D03 cytochrome oxidase subunit 1 (COI) gene, partial cds; mitochondrial	39.4	39.4	1	0.004	0.95	KR566129.1	313	....A................	333
1813Select seq gb|KR566122.1|	Schizaphis graminum voucher BIOUG16025-D12 cytochrome oxidase subunit 1 (COI) gene, partial cds; mitochondrial	39.4	39.4	1	0.004	0.95	KR566122.1	303	....A................	323
1814Select seq gb|KR566119.1|	Uroleucon sp. BOLD-2016 voucher BIOUG08284-D01 cytochrome oxidase subunit 1 (COI) gene, partial cds; mitochondrial	39.4	39.4	1	0.004	0.95	KR566119.1	303	....A................	323
1815Select seq gb|KR566104.1|	Hyperomyzus picridis voucher BIOUG16086-H02 cytochrome oxidase subunit 1 (COI) gene, partial cds; mitochondrial	39.4	39.4	1	0.004	0.95	KR566104.1	303	....A................	323
1816Select seq gb|KR566097.1|	Macrosiphum sp. BOLD-2016 voucher BIOUG05091-D11 cytochrome oxidase subunit 1 (COI) gene, partial cds; mitochondrial	39.4	39.4	1	0.004	0.95	KR566097.1	309	....A................	329
1817Select seq gb|KR566093.1|	Aphidinae sp. BOLD:AAB1787 voucher BIOUG02739-E09 cytochrome oxidase subunit 1 (COI) gene, partial cds; mitochondrial	39.4	39.4	1	0.004	0.95	KR566093.1	313	....A................	333
1818Select seq gb|KR566090.1|	Aphididae sp. SMTPD4485-13 voucher BIOUG08659-F01 cytochrome oxidase subunit 1 (COI) gene, partial cds; mitochondrial	39.4	39.4	1	0.004	0.95	KR566090.1	173	....A................	193
1819Select seq gb|KR566062.1|	Calaphidinae sp. BOLD-2016 voucher BIOUG05404-G07 cytochrome oxidase subunit 1 (COI) gene, partial cds; mitochondrial	39.4	39.4	1	0.004	0.95	KR566062.1	313	....A................	333
1820Select seq gb|KR566050.1|	Nasonovia sp. BOLD:AAB9332 voucher BIOUG16130-A09 cytochrome oxidase subunit 1 (COI) gene, partial cds; mitochondrial	39.4	39.4	1	0.004	0.95	KR566050.1	312	....A................	332
1821Select seq gb|KR566048.1|	Macrosiphum zionense voucher BIOUG09237-D11 cytochrome oxidase subunit 1 (COI) gene, partial cds; mitochondrial	39.4	39.4	1	0.004	0.95	KR566048.1	302	....A................	322
1822Select seq gb|KR566047.1|	Aphis glycines voucher BIOUG16038-A04 cytochrome oxidase subunit 1 (COI) gene, partial cds; mitochondrial	39.4	39.4	1	0.004	0.95	KR566047.1	303	....A................	323
1823Select seq gb|KR566041.1|	Macrosiphum sp. BOLD-2016 voucher BIOUG09174-G03 cytochrome oxidase subunit 1 (COI) gene, partial cds; mitochondrial	39.4	39.4	1	0.004	0.95	KR566041.1	303	....A................	323
1824Select seq gb|KR566034.1|	Aphis sp. BOLD:AAB7937 voucher BIOUG12856-A11 cytochrome oxidase subunit 1 (COI) gene, partial cds; mitochondrial	39.4	39.4	1	0.004	0.95	KR566034.1	312	....A................	332
1825Select seq gb|KR566032.1|	Macrosiphum sp. BOLD-2016 voucher BIOUG06422-H05 cytochrome oxidase subunit 1 (COI) gene, partial cds; mitochondrial	39.4	39.4	1	0.004	0.95	KR566032.1	305	....A................	325
1826Select seq gb|KR566024.1|	Calaphis betulaecolens voucher BIOUG07279-G04 cytochrome oxidase subunit 1 (COI) gene, partial cds; mitochondrial	39.4	39.4	1	0.004	0.95	KR566024.1	313	....A................	333
1827Select seq gb|KR565991.1|	Uroleucon sp. BOLD-2016 voucher BIOUG04826-G06 cytochrome oxidase subunit 1 (COI) gene, partial cds; mitochondrial	39.4	39.4	1	0.004	0.95	KR565991.1	303	....A................	323
1828Select seq gb|KR565963.1|	Aphididae sp. BOLD:ACE5126 voucher BIOUG13141-F02 cytochrome oxidase subunit 1 (COI) gene, partial cds; mitochondrial	39.4	39.4	1	0.004	0.95	KR565963.1	313	....A................	333
1829Select seq gb|KR565960.1|	Uroleucon (Uroleucon) sp. BOLD-2016 voucher BIOUG01504-E12 cytochrome oxidase subunit 1 (COI) gene, partial cds; mitochondrial	39.4	39.4	1	0.004	0.95	KR565960.1	313	....A................	333
1830Select seq gb|KR565956.1|	Aphididae sp. SSBRA1529-14 voucher BIOUG12622-E10 cytochrome oxidase subunit 1 (COI) gene, partial cds; mitochondrial	39.4	39.4	1	0.004	0.95	KR565956.1	303	....A................	323
1831Select seq gb|KR565945.1|	Uroleucon sp. BOLD:AAC1285 voucher BIOUG07967-D01 cytochrome oxidase subunit 1 (COI) gene, partial cds; mitochondrial	39.4	39.4	1	0.004	0.95	KR565945.1	312	....A................	332
1832Select seq gb|KR565928.1|	Aphis glycines voucher BIOUG01607-G04 cytochrome oxidase subunit 1 (COI) gene, partial cds; mitochondrial	39.4	39.4	1	0.004	0.95	KR565928.1	257	....A................	277
1833Select seq gb|KR565924.1|	Aphis sp. BOLD:AAB7937 voucher BIOUG16086-H09 cytochrome oxidase subunit 1 (COI) gene, partial cds; mitochondrial	39.4	39.4	1	0.004	0.95	KR565924.1	300	....A................	320
1834Select seq gb|KR565913.1|	Macrosiphum sp. BOLD-2016 voucher BIOUG09180-A08 cytochrome oxidase subunit 1 (COI) gene, partial cds; mitochondrial	39.4	39.4	1	0.004	0.95	KR565913.1	296	....A................	316
1835Select seq gb|KR565875.1|	Aphis sp. BOLD:AAB7937 voucher BIOUG10896-G11 cytochrome oxidase subunit 1 (COI) gene, partial cds; mitochondrial	39.4	39.4	1	0.004	0.95	KR565875.1	314	....A................	334
1836Select seq gb|KR565852.1|	Aphis sp. BOLD:AAA6378 voucher BIOUG06391-E11 cytochrome oxidase subunit 1 (COI) gene, partial cds; mitochondrial	39.4	39.4	1	0.004	0.95	KR565852.1	304	....A................	324
1837Select seq gb|KR565849.1|	Macrosiphum sp. BOLD-2016 voucher BIOUG09367-F06 cytochrome oxidase subunit 1 (COI) gene, partial cds; mitochondrial	39.4	39.4	1	0.004	0.95	KR565849.1	305	....A................	325
1838Select seq gb|KR565848.1|	Calaphidinae sp. BOLD-2016 voucher BIOUG03716-G01 cytochrome oxidase subunit 1 (COI) gene, partial cds; mitochondrial	39.4	39.4	1	0.004	0.95	KR565848.1	313	....A................	333
1839Select seq gb|KR565842.1|	Aphididae sp. BOLD:AAG3894 voucher BIOUG14251-A05 cytochrome oxidase subunit 1 (COI) gene, partial cds; mitochondrial	39.4	39.4	1	0.004	0.95	KR565842.1	288	....A................	308
1840Select seq gb|KR565822.1|	Macrosiphum sp. BOLD-2016 voucher BIOUG09173-A12 cytochrome oxidase subunit 1 (COI) gene, partial cds; mitochondrial	39.4	39.4	1	0.004	0.95	KR565822.1	246	....A................	266
1841Select seq gb|KR565812.1|	Drepanosiphum sp. BOLD:AAH2853 voucher BIOUG07292-F06 cytochrome oxidase subunit 1 (COI) gene, partial cds; mitochondrial	39.4	39.4	1	0.004	0.95	KR565812.1	313	....A................	333
1842Select seq gb|KR565793.1|	Macrosiphum sp. BOLD-2016 voucher BIOUG09174-C09 cytochrome oxidase subunit 1 (COI) gene, partial cds; mitochondrial	39.4	39.4	1	0.004	0.95	KR565793.1	300	....A................	320
1843Select seq gb|KR565776.1|	Rhopalosiphum cerasifoliae voucher BIOUG07811-C03 cytochrome oxidase subunit 1 (COI) gene, partial cds; mitochondrial	39.4	39.4	1	0.004	0.95	KR565776.1	315	....A................	335
1844Select seq gb|KR565773.1|	Calaphidinae sp. BOLD-2016 voucher BIOUG04196-H05 cytochrome oxidase subunit 1 (COI) gene, partial cds; mitochondrial	39.4	39.4	1	0.004	0.95	KR565773.1	313	....A................	333
1845Select seq gb|KR565757.1|	Aphididae sp. BOLD:AAB1787 voucher BIOUG08671-G11 cytochrome oxidase subunit 1 (COI) gene, partial cds; mitochondrial	39.4	39.4	1	0.004	0.95	KR565757.1	296	....A................	316
1846Select seq gb|KR565747.1|	Macrosiphum sp. BOLD-2016 voucher BIOUG09179-E10 cytochrome oxidase subunit 1 (COI) gene, partial cds; mitochondrial	39.4	39.4	1	0.004	0.95	KR565747.1	296	....A................	316
1847Select seq gb|KR565745.1|	Calaphidinae sp. BOLD-2016 voucher BIOUG04197-G10 cytochrome oxidase subunit 1 (COI) gene, partial cds; mitochondrial	39.4	39.4	1	0.004	0.95	KR565745.1	313	....A................	333
1848Select seq gb|KR565722.1|	Macrosiphum sp. BOLD-2016 voucher BIOUG05956-H02 cytochrome oxidase subunit 1 (COI) gene, partial cds; mitochondrial	39.4	39.4	1	0.004	0.95	KR565722.1	305	....A................	325
1849Select seq gb|KR565707.1|	Hyperomyzus sp. BOLD:AAB8566 voucher BIOUG03672-D11 cytochrome oxidase subunit 1 (COI) gene, partial cds; mitochondrial	39.4	39.4	1	0.004	0.95	KR565707.1	313	....A................	333
1850Select seq gb|KR565683.1|	Nearctaphis crataegifoliae voucher BIOUG16161-C10 cytochrome oxidase subunit 1 (COI) gene, partial cds; mitochondrial	39.4	39.4	1	0.004	0.95	KR565683.1	312	....A................	332
1851Select seq gb|KR565657.1|	Illinoia sp. BOLD-2016 voucher BIOUG09175-D12 cytochrome oxidase subunit 1 (COI) gene, partial cds; mitochondrial	39.4	39.4	1	0.004	0.95	KR565657.1	300	....A................	320
1852Select seq gb|KR565647.1|	Calaphidinae sp. BOLD-2016 voucher BIOUG04225-A12 cytochrome oxidase subunit 1 (COI) gene, partial cds; mitochondrial	39.4	39.4	1	0.004	0.95	KR565647.1	313	....A................	333
1853Select seq gb|KR565617.1|	Macrosiphum sp. BOLD-2016 voucher BIOUG05956-G12 cytochrome oxidase subunit 1 (COI) gene, partial cds; mitochondrial	39.4	39.4	1	0.004	0.95	KR565617.1	305	....A................	325
1854Select seq gb|KR565606.1|	Calaphidinae sp. BOLD-2016 voucher BIOUG03852-F01 cytochrome oxidase subunit 1 (COI) gene, partial cds; mitochondrial	39.4	39.4	1	0.004	0.95	KR565606.1	313	....A................	333
1855Select seq gb|KR565589.1|	Nasonovia sp. BOLD:AAB9332 voucher BIOUG16097-D01 cytochrome oxidase subunit 1 (COI) gene, partial cds; mitochondrial	39.4	39.4	1	0.004	0.95	KR565589.1	303	....A................	323
1856Select seq gb|KR565579.1|	Macrosiphum sp. BOLD-2016 voucher BIOUG09175-F02 cytochrome oxidase subunit 1 (COI) gene, partial cds; mitochondrial	39.4	39.4	1	0.004	0.95	KR565579.1	305	....A................	325
1857Select seq gb|KR565578.1|	Uroleucon (Lambersius) sp. BOLD-2016 voucher 10BBCHEM-0199 cytochrome oxidase subunit 1 (COI) gene, partial cds; mitochondrial	39.4	39.4	1	0.004	0.95	KR565578.1	313	....A................	333
1858Select seq gb|KR565573.1|	Calaphidinae sp. BOLD-2016 voucher BIOUG04225-B01 cytochrome oxidase subunit 1 (COI) gene, partial cds; mitochondrial	39.4	39.4	1	0.004	0.95	KR565573.1	313	....A................	333
1859Select seq gb|KR565571.1|	Nasonovia sp. BOLD:AAB9332 voucher BIOUG16112-C07 cytochrome oxidase subunit 1 (COI) gene, partial cds; mitochondrial	39.4	39.4	1	0.004	0.95	KR565571.1	303	....A................	323
1860Select seq gb|KR565557.1|	Aphidinae sp. BOLD:AAB1787 voucher BIOUG12132-A09 cytochrome oxidase subunit 1 (COI) gene, partial cds; mitochondrial	39.4	39.4	1	0.004	0.95	KR565557.1	312	....A................	332
1861Select seq gb|KR565542.1|	Macrosiphum sp. BOLD-2016 voucher BIOUG01000-A02 cytochrome oxidase subunit 1 (COI) gene, partial cds; mitochondrial	39.4	39.4	1	0.004	0.95	KR565542.1	313	....A................	333
1862Select seq gb|KR565540.1|	Aphis sp. BOLD:AAC7705 voucher BIOUG12531-C09 cytochrome oxidase subunit 1 (COI) gene, partial cds; mitochondrial	39.4	39.4	1	0.004	0.95	KR565540.1	300	....A................	320
1863Select seq gb|KR565525.1|	Aphididae sp. BOLD:AAI3996 voucher BIOUG15929-C11 cytochrome oxidase subunit 1 (COI) gene, partial cds; mitochondrial	39.4	39.4	1	0.004	0.95	KR565525.1	303	....A................	323
1864Select seq gb|KR565519.1|	Calaphidinae sp. BOLD-2016 voucher BIOUG03541-F09 cytochrome oxidase subunit 1 (COI) gene, partial cds; mitochondrial	39.4	39.4	1	0.004	0.95	KR565519.1	313	....A................	333
1865Select seq gb|KR565508.1|	Calaphidinae sp. BOLD-2016 voucher BIOUG03541-C11 cytochrome oxidase subunit 1 (COI) gene, partial cds; mitochondrial	39.4	39.4	1	0.004	0.95	KR565508.1	313	....A................	333
1866Select seq gb|KR565489.1|	Macrosiphum sp. BOLD-2016 voucher BIOUG06245-B01 cytochrome oxidase subunit 1 (COI) gene, partial cds; mitochondrial	39.4	39.4	1	0.004	0.95	KR565489.1	304	....A................	324
1867Select seq gb|KR565453.1|	Uroleucon sp. BOLD-2016 voucher BIOUG04396-C11 cytochrome oxidase subunit 1 (COI) gene, partial cds; mitochondrial	39.4	39.4	1	0.004	0.95	KR565453.1	313	....A................	333
1868Select seq gb|KR565451.1|	Calaphidinae sp. BOLD-2016 voucher BIOUG04197-G02 cytochrome oxidase subunit 1 (COI) gene, partial cds; mitochondrial	39.4	39.4	1	0.004	0.95	KR565451.1	313	....A................	333
1869Select seq gb|KR565434.1|	Calaphidinae sp. BOLD-2016 voucher BIOUG03055-E11 cytochrome oxidase subunit 1 (COI) gene, partial cds; mitochondrial	39.4	39.4	1	0.004	0.95	KR565434.1	313	....A................	333
1870Select seq gb|KR565431.1|	Aphidinae sp. BOLD-2016 voucher BIOUG07312-B05 cytochrome oxidase subunit 1 (COI) gene, partial cds; mitochondrial	39.4	39.4	1	0.004	0.95	KR565431.1	305	....A................	325
1871Select seq gb|KR565428.1|	Aphis caliginosa voucher BIOUG00999-B01 cytochrome oxidase subunit 1 (COI) gene, partial cds; mitochondrial	39.4	39.4	1	0.004	0.95	KR565428.1	313	....A................	333
1872Select seq gb|KR565412.1|	Calaphidinae sp. BOLD-2016 voucher BIOUG04196-D12 cytochrome oxidase subunit 1 (COI) gene, partial cds; mitochondrial	39.4	39.4	1	0.004	0.95	KR565412.1	313	....A................	333
1873Select seq gb|KR565407.1|	Calaphidinae sp. BOLD-2016 voucher BIOUG03716-E05 cytochrome oxidase subunit 1 (COI) gene, partial cds; mitochondrial	39.4	39.4	1	0.004	0.95	KR565407.1	313	....A................	333
1874Select seq gb|KR565390.1|	Calaphidinae sp. BOLD-2016 voucher BIOUG04196-G07 cytochrome oxidase subunit 1 (COI) gene, partial cds; mitochondrial	39.4	39.4	1	0.004	0.95	KR565390.1	313	....A................	333
1875Select seq gb|KR565388.1|	Calaphidinae sp. BOLD-2016 voucher BIOUG03672-F04 cytochrome oxidase subunit 1 (COI) gene, partial cds; mitochondrial	39.4	39.4	1	0.004	0.95	KR565388.1	313	....A................	333
1876Select seq gb|KR565385.1|	Nearctaphis sp. BOLD-2016 voucher BIOUG03700-E01 cytochrome oxidase subunit 1 (COI) gene, partial cds; mitochondrial	39.4	39.4	1	0.004	0.95	KR565385.1	313	....A................	333
1877Select seq gb|KR565384.1|	Rhopalosiphum nymphaeae voucher BIOUG16133-H03 cytochrome oxidase subunit 1 (COI) gene, partial cds; mitochondrial	39.4	39.4	1	0.004	0.95	KR565384.1	312	....A................	332
1878Select seq gb|KR565376.1|	Aphis pentstemonicola voucher BIOUG05351-C05 cytochrome oxidase subunit 1 (COI) gene, partial cds; mitochondrial	39.4	39.4	1	0.004	0.95	KR565376.1	313	....A................	333
1879Select seq gb|KR565363.1|	Macrosiphum sp. BOLD-2016 voucher BIOUG08734-A01 cytochrome oxidase subunit 1 (COI) gene, partial cds; mitochondrial	39.4	39.4	1	0.004	0.95	KR565363.1	300	....A................	320
1880Select seq gb|KR565349.1|	Hyadaphis passerinii voucher BIOUG08659-F10 cytochrome oxidase subunit 1 (COI) gene, partial cds; mitochondrial	39.4	39.4	1	0.004	0.95	KR565349.1	312	....A................	332
1881Select seq gb|KR565298.1|	Rhopalomyzus lonicerae voucher BIOUG16093-C03 cytochrome oxidase subunit 1 (COI) gene, partial cds; mitochondrial	39.4	39.4	1	0.004	0.95	KR565298.1	281	....A................	301
1882Select seq gb|KR565286.1|	Aphis glycines voucher BIOUG16139-F04 cytochrome oxidase subunit 1 (COI) gene, partial cds; mitochondrial	39.4	39.4	1	0.004	0.95	KR565286.1	312	....A................	332
1883Select seq gb|KR565284.1|	Calaphidinae sp. BOLD-2016 voucher BIOUG03541-D12 cytochrome oxidase subunit 1 (COI) gene, partial cds; mitochondrial	39.4	39.4	1	0.004	0.95	KR565284.1	313	....A................	333
1884Select seq gb|KR565262.1|	Aphis sp. BOLD:AAA6378 voucher BIOUG12502-E07 cytochrome oxidase subunit 1 (COI) gene, partial cds; mitochondrial	39.4	39.4	1	0.004	0.95	KR565262.1	312	....A................	332
1885Select seq gb|KR565258.1|	Calaphidinae sp. BOLD-2016 voucher BIOUG04097-F12 cytochrome oxidase subunit 1 (COI) gene, partial cds; mitochondrial	39.4	39.4	1	0.004	0.95	KR565258.1	313	....A................	333
1886Select seq gb|KR565244.1|	Aphididae sp. BOLD:AAC1372 voucher BIOUG09681-H05 cytochrome oxidase subunit 1 (COI) gene, partial cds; mitochondrial	39.4	39.4	1	0.004	0.95	KR565244.1	305	....A................	325
1887Select seq gb|KR565225.1|	Aphis glycines voucher BIOUG16021-B08 cytochrome oxidase subunit 1 (COI) gene, partial cds; mitochondrial	39.4	39.4	1	0.004	0.95	KR565225.1	312	....A................	332
1888Select seq gb|KR565223.1|	Calaphidinae sp. BOLD-2016 voucher BIOUG03672-A10 cytochrome oxidase subunit 1 (COI) gene, partial cds; mitochondrial	39.4	39.4	1	0.004	0.95	KR565223.1	313	....A................	333
1889Select seq gb|KR565197.1|	Aphididae sp. BOLD:AAA4183 voucher BIOUG09129-C01 cytochrome oxidase subunit 1 (COI) gene, partial cds; mitochondrial	39.4	39.4	1	0.004	0.95	KR565197.1	303	....A................	323
1890Select seq gb|KR565195.1|	Calaphidinae sp. BOLD-2016 voucher BIOUG04196-E10 cytochrome oxidase subunit 1 (COI) gene, partial cds; mitochondrial	39.4	39.4	1	0.004	0.95	KR565195.1	313	....A................	333
1891Select seq gb|KR565187.1|	Aphidinae sp. BOLD-2016 voucher BIOUG14006-G08 cytochrome oxidase subunit 1 (COI) gene, partial cds; mitochondrial	39.4	39.4	1	0.004	0.95	KR565187.1	292	....A................	312
1892Select seq gb|KR565138.1|	Illinoia sp. BOLD-2016 voucher BIOUG09173-A09 cytochrome oxidase subunit 1 (COI) gene, partial cds; mitochondrial	39.4	39.4	1	0.004	0.95	KR565138.1	300	....A................	320
1893Select seq gb|KR565135.1|	Uroleucon sp. BOLD:AAF8501 voucher BIOUG07937-F12 cytochrome oxidase subunit 1 (COI) gene, partial cds; mitochondrial	39.4	39.4	1	0.004	0.95	KR565135.1	312	....A................	332
1894Select seq gb|KR565128.1|	Illinoia sp. BOLD-2016 voucher BIOUG09178-D12 cytochrome oxidase subunit 1 (COI) gene, partial cds; mitochondrial	39.4	39.4	1	0.004	0.95	KR565128.1	290	....A................	310
1895Select seq gb|KR565113.1|	Calaphidinae sp. BOLD-2016 voucher BIOUG04197-B06 cytochrome oxidase subunit 1 (COI) gene, partial cds; mitochondrial	39.4	39.4	1	0.004	0.95	KR565113.1	313	....A................	333
1896Select seq gb|KR565112.1|	Calaphidinae sp. BOLD-2016 voucher BIOUG03696-B09 cytochrome oxidase subunit 1 (COI) gene, partial cds; mitochondrial	39.4	39.4	1	0.004	0.95	KR565112.1	313	....A................	333
1897Select seq gb|KR565110.1|	Metcalfa pruinosa voucher BIOUG16004-B12 cytochrome oxidase subunit 1 (COI) gene, partial cds; mitochondrial	39.4	39.4	1	0.004	0.95	KR565110.1	278	....T................	298
1898Select seq gb|KR565090.1|	Calaphidinae sp. BOLD-2016 voucher BIOUG04197-F08 cytochrome oxidase subunit 1 (COI) gene, partial cds; mitochondrial	39.4	39.4	1	0.004	0.95	KR565090.1	313	....A................	333
1899Select seq gb|KR565088.1|	Aphidinae sp. BOLD-2016 voucher BIOUG09367-C06 cytochrome oxidase subunit 1 (COI) gene, partial cds; mitochondrial	39.4	39.4	1	0.004	0.95	KR565088.1	305	....A................	325
1900Select seq gb|KR565079.1|	Calaphidinae sp. BOLD-2016 voucher BIOUG03852-F05 cytochrome oxidase subunit 1 (COI) gene, partial cds; mitochondrial	39.4	39.4	1	0.004	0.95	KR565079.1	313	....A................	333
1901Select seq gb|KR565069.1|	Uroleucon sp. BOLD-2016 voucher BIOUG09180-A10 cytochrome oxidase subunit 1 (COI) gene, partial cds; mitochondrial	39.4	39.4	1	0.004	0.95	KR565069.1	303	....A................	323
1902Select seq gb|KR565058.1|	Calaphidinae sp. BOLD-2016 voucher BIOUG04196-G06 cytochrome oxidase subunit 1 (COI) gene, partial cds; mitochondrial	39.4	39.4	1	0.004	0.95	KR565058.1	313	....A................	333
1903Select seq gb|KR565019.1|	Cinara strobi voucher BIOUG07159-H10 cytochrome oxidase subunit 1 (COI) gene, partial cds; mitochondrial	39.4	39.4	1	0.004	0.95	KR565019.1	313	....A................	333
1904Select seq gb|KR565014.1|	Aphididae sp. BOLD:AAD6640 voucher BIOUG13248-E09 cytochrome oxidase subunit 1 (COI) gene, partial cds; mitochondrial	39.4	39.4	1	0.004	0.95	KR565014.1	312	....A................	332
1905Select seq gb|KR565004.1|	Nearctaphis bakeri voucher BIOUG16131-G02 cytochrome oxidase subunit 1 (COI) gene, partial cds; mitochondrial	39.4	39.4	1	0.004	0.95	KR565004.1	312	....A................	332
1906Select seq gb|KR564991.1|	Calaphidinae sp. BOLD-2016 voucher BIOUG03852-G04 cytochrome oxidase subunit 1 (COI) gene, partial cds; mitochondrial	39.4	39.4	1	0.004	0.95	KR564991.1	313	....A................	333
1907Select seq gb|KR564985.1|	Illinoia sp. BOLD-2016 voucher BIOUG09623-D12 cytochrome oxidase subunit 1 (COI) gene, partial cds; mitochondrial	39.4	39.4	1	0.004	0.95	KR564985.1	303	....A................	323
1908Select seq gb|KR564979.1|	Uroleucon sp. BOLD-2016 voucher BIOUG04653-H08 cytochrome oxidase subunit 1 (COI) gene, partial cds; mitochondrial	39.4	39.4	1	0.004	0.95	KR564979.1	288	....A................	308
1909Select seq gb|KR564958.1|	Aphis sp. BOLD:AAB7937 voucher BIOUG10486-F08 cytochrome oxidase subunit 1 (COI) gene, partial cds; mitochondrial	39.4	39.4	1	0.004	0.95	KR564958.1	313	....A................	333
1910Select seq gb|KR564949.1|	Rhopalomyzus lonicerae voucher BIOUG16063-F10 cytochrome oxidase subunit 1 (COI) gene, partial cds; mitochondrial	39.4	39.4	1	0.004	0.95	KR564949.1	312	....A................	332
1911Select seq gb|KR564942.1|	Drepanaphis sp. BOLD-2016 voucher BIOUG09282-D05 cytochrome oxidase subunit 1 (COI) gene, partial cds; mitochondrial	39.4	39.4	1	0.004	0.95	KR564942.1	312	....A................	332
1912Select seq gb|KR564938.1|	Uroleucon sp. BOLD-2016 voucher BIOUG09176-C05 cytochrome oxidase subunit 1 (COI) gene, partial cds; mitochondrial	39.4	39.4	1	0.004	0.95	KR564938.1	313	....A................	333
1913Select seq gb|KR564929.1|	Aphis equiseticola voucher BIOUG16099-B02 cytochrome oxidase subunit 1 (COI) gene, partial cds; mitochondrial	39.4	39.4	1	0.004	0.95	KR564929.1	312	....A................	332
1914Select seq gb|KR564922.1|	Calaphidinae sp. BOLD-2016 voucher BIOUG03716-C02 cytochrome oxidase subunit 1 (COI) gene, partial cds; mitochondrial	39.4	39.4	1	0.004	0.95	KR564922.1	313	....A................	333
1915Select seq gb|KR564917.1|	Macrosiphum zionense voucher BIOUG09237-B02 cytochrome oxidase subunit 1 (COI) gene, partial cds; mitochondrial	39.4	39.4	1	0.004	0.95	KR564917.1	302	....A................	322
1916Select seq gb|KR564913.1|	Uroleucon sp. BOLD-2016 voucher BIOUG09176-G08 cytochrome oxidase subunit 1 (COI) gene, partial cds; mitochondrial	39.4	39.4	1	0.004	0.95	KR564913.1	305	....A................	325
1917Select seq gb|KR564912.1|	Macrosiphum zionense voucher BIOUG09237-B11 cytochrome oxidase subunit 1 (COI) gene, partial cds; mitochondrial	39.4	39.4	1	0.004	0.95	KR564912.1	304	....A................	324
1918Select seq gb|KR564856.1|	Metopolophium sp. BOLD:AAE7796 voucher BIOUG16018-C02 cytochrome oxidase subunit 1 (COI) gene, partial cds; mitochondrial	39.4	39.4	1	0.004	0.95	KR564856.1	303	....A................	323
1919Select seq gb|KR564854.1|	Macrosiphum sp. BOLD-2016 voucher BIOUG05956-D03 cytochrome oxidase subunit 1 (COI) gene, partial cds; mitochondrial	39.4	39.4	1	0.004	0.95	KR564854.1	304	....A................	324
1920Select seq gb|KR564821.1|	Aphis glycines voucher BIOUG16071-G07 cytochrome oxidase subunit 1 (COI) gene, partial cds; mitochondrial	39.4	39.4	1	0.004	0.95	KR564821.1	303	....A................	323
1921Select seq gb|KR564813.1|	Calaphidinae sp. BOLD-2016 voucher BIOUG04097-F10 cytochrome oxidase subunit 1 (COI) gene, partial cds; mitochondrial	39.4	39.4	1	0.004	0.95	KR564813.1	313	....A................	333
1922Select seq gb|KR564795.1|	Utamphorophora humboldti voucher BIOUG16013-C02 cytochrome oxidase subunit 1 (COI) gene, partial cds; mitochondrial	39.4	39.4	1	0.004	0.95	KR564795.1	312	....A................	332
1923Select seq gb|KR564782.1|	Macrosiphum sp. BOLD-2016 voucher BIOUG06422-H08 cytochrome oxidase subunit 1 (COI) gene, partial cds; mitochondrial	39.4	39.4	1	0.004	0.95	KR564782.1	313	....A................	333
[truncated: 3,077 more rows]

## Sheet: Reverse primer matched sequence
Sequences producing significant alignments:									Primer forward sequence alignments
[truncated: 5,001 more rows]
